# Supplementary material
Source: PubMed Central journal article supplement (PMC8904692)
Supplement: 11606_2021_7055_MOESM1_ESM.pdf [file 11606_2021_7055_MOESM1_ESM.pdf]

**eSupplement:** Predictors of physician compassion, empathy and related constructs: a systematic review

*A. Pavlova, C.X.Y. Wang, A. O’Callaghan, A. Boggiss & N. Consedine*

**eSupplement 1:** ECRC construct selection rationale

It has been recognised for some time that research on “compassion” substantially overlaps with studies of empathy, care, and other constructs<sup>1</sup>. While most healthcare professionals are encouraged to practice with compassion specifically, it has been suggested that research specific to medical compassion is scarce, with the majority of studies focusing on compassion fatigue, empathy, and other related constructs such as kindness and patient-centred care<sup>2</sup>. Making matters more complex is that such terms and constructs are often used interchangeably – conceptually as well as with respect to measurement. Braker<sup>3</sup>, for example, defines empathy as “the act of perceiving, understanding, experiencing, and responding to the emotional state and ideas of another person” (p.141) while Geer, Estupinan, and Manguno Mire<sup>4</sup> define empathy as “the ability to perceive another person’s point-of-view, experience the emotions of another and behave compassionately” (p. 101), despite the fact that compassion is typically differentiated from empathy because of its focus on *actively* alleviating suffering<sup>5</sup>. Compassion and empathy, in particular, are similarly conflated in measurement with commonly-used measures such as the Jefferson Scale of Physician Empathy incorporating “Compassionate Care” as a subscale<sup>6</sup>.

Nevertheless, while a more restrictive review might be beneficial, the empirical overlap in studies suggests that only allowing reports including the term “compassion” would both misrepresent the state of the literature and preclude commentary on where prior studies are focused. Thus, to characterise the extent to which compassion versus related constructs has been the focus of research and to evaluate whether the factors predicting compassion versus constructs are similar or different, this review included both compassion and related constructs. In addition to compassion, studies included in the review looked at the factors that also predicted such constructs as compassionate care, empathy, empathetic or empathic concern, prosocial behaviours such as motivation or desire to help, patient-centred or person-centred care, caring behaviour, kindness, humanistic care and cynicism (a reverse construct defined as inability to understand and be moved by someone’s suffering, leading to inaction<sup>7</sup>).

The following constructs were excluded due to limited construct validity: compassion or empathy fatigue, sympathy; depersonalization (internal process); communication-related studies (e.g., patient-centred communication, empathic communication); doctor-patient relationships or therapeutic alliance; and confidence in providing compassionate care.

PREDICTORS OF PHYSICIAN COMPASSION: A SYSTEMATIC REVIEW

**eSupplement 2:** Search strategies (24.04.2020) (N=total/deduplicated)

**EMBASE (N=7142/3547), MEDLINE/PreMEDLINE (N=4324/4319), PsycINFO**

**(N=1009/654), OvidJournals (N=947/323), AMED (N=58/39) (OVID SP interface)**

| # | Search Statement                                                                                                                                                                                                                                                                                                                                                                                                                                                                                                                                                                                                                                                                                                                                                                                                                                                                                                                                                                                                                                                                                                                                                                                                                                                         |
|---|--------------------------------------------------------------------------------------------------------------------------------------------------------------------------------------------------------------------------------------------------------------------------------------------------------------------------------------------------------------------------------------------------------------------------------------------------------------------------------------------------------------------------------------------------------------------------------------------------------------------------------------------------------------------------------------------------------------------------------------------------------------------------------------------------------------------------------------------------------------------------------------------------------------------------------------------------------------------------------------------------------------------------------------------------------------------------------------------------------------------------------------------------------------------------------------------------------------------------------------------------------------------------|
| 1 | health personnel/ or case managers/ or medical staff/ or medical staff, hospital/ or hospitalists/ or personnel, hospital/ or general practitioners/ or health care personnel/ or advanced practice provider/ or care coordinator/ or clinician/ or health workforce/ or hospital personnel/ or medical personnel/ or paramedical personnel/ or medical staff/ or medical assistant/ or medical expert/ or medical registrar/ or medical specialist/ or medical staff/ or psychotherapist/ or health practitioner/ or health visitor/                                                                                                                                                                                                                                                                                                                                                                                                                                                                                                                                                                                                                                                                                                                                    |
| 2 | nurses/ or nurse practitioners/ or family nurse practitioners/ or pediatric nurse practitioners/ or nurse specialists/ or nurse clinicians/ or nurse midwives/ or nurses, pediatric/ or nurses, neonatal/ or nursing staff/ or nursing staff, hospital/ or physicians/ or physicians, family/ or physicians, primary care/ or nurse anesthetists/ or nurse/ or advanced practice nurse/ or nursing assistant/ or nursing staff/ or case manager/ or expert nurse/ or first assistant/ or foreign nurse/ or licensed practical nurse/ or male nurse/ or nurse consultant/ or practical nurse/ or registered nurse/ or staff nurse/ or nurse specialist/ or clinical nurse specialist/ or neonatal nurse/ or nurse anesthetist/ or nurse midwife/ or oncology nurse/ or pediatric nurse/ or nurse practitioner/ or acute care nurse practitioner/ or adult nurse practitioner/ or emergency nurse practitioner/ or family nurse practitioner/ or gerontologic nurse practitioner/ or infection control practitioner/ or neonatal nurse practitioner/ or pediatric nurse practitioner/ or physician/ or hospital physician/ or physician assistant/ or female physician/ or foreign physician/ or emergency physician/ or occupational physician/ or osteopathic physician/ |
| 3 | anesthetists/ or anesthesiologists/ or audiologists/ or dental staff/ or dental staff, hospital/ or dentists/ or nutritionists/ or occupational therapists/ or optometrists/ or physical therapists/ or allergists/ or cardiologists/ or dermatologists/ or endocrinologists/ or gastroenterologists/ or geriatricians/ or nephrologists/ or neurologists/ or occupational health physicians/ or oncologists/ or radiation oncologists/ or ophthalmologists/ or osteopathic physicians/ or otolaryngologists/ or pediatricians/ or neonatologists/ or physiatrists/ or pulmonologists/ or radiologists/ or rheumatologists/ or surgeons/ or neurosurgeons/ or orthopedic surgeons/ or urologists/ or andrologist/ or anesthesiologist/ or cardiologist/ or dermatologist/ or diabetologist/ or endocrinologist/ or epileptologist/ or gastroenterologist/ or general practitioner/ or geriatrician/ or gerontologist/ or gynecologist/ or hematologist/ or hepatologist/ or immunologist/ or infectious disease specialist/ or intensivist/ or internist/ or medical geneticist/ or neonatologist/ or                                                                                                                                                                    |

PREDICTORS OF PHYSICIAN COMPASSION: A SYSTEMATIC REVIEW

|   |                                                                                                                                                                                                                                                                                                                                                                                                                                                                                                                                                                                                                                                                                                                                                                                                                                                                                                                                                                                                                                                                                                                                                                                                                                                                                                                                                                                                                                                                                                                                                                                                                                                                                                                        |
|---|------------------------------------------------------------------------------------------------------------------------------------------------------------------------------------------------------------------------------------------------------------------------------------------------------------------------------------------------------------------------------------------------------------------------------------------------------------------------------------------------------------------------------------------------------------------------------------------------------------------------------------------------------------------------------------------------------------------------------------------------------------------------------------------------------------------------------------------------------------------------------------------------------------------------------------------------------------------------------------------------------------------------------------------------------------------------------------------------------------------------------------------------------------------------------------------------------------------------------------------------------------------------------------------------------------------------------------------------------------------------------------------------------------------------------------------------------------------------------------------------------------------------------------------------------------------------------------------------------------------------------------------------------------------------------------------------------------------------|
|   | <p>nephrologist/ or neurologist/ or obstetrician/ or oncologist/ or ophthalmologist/ or orthopedic specialist/ or otolaryngologist/ or pathologist/ or pediatrician/ or phlebologist/ or physiatrist/ or podiatrist/ or psychiatrist/ or pulmonologist/ or radiologist/ or rheumatologist/ or urologist/ or vaccinologist/ or anesthesiologist/ or dental personnel/ or eye care professional/ or orthotist/ or prosthetist/ or dental prosthetist/ or transplant coordinator/ or radiologist/ or diagnostic radiologist/ or interventional radiologist/ or musculoskeletal radiologist/ or neuroradiologist/ or pediatric radiologist/ or radiographer/ or radiologist assistant/ or radiotherapist/ or interventional neuroradiologist/ or surgeon/ or cardiac surgeon/ or dental surgeon/ or high volume surgeon/ or low volume surgeon/ or neurosurgeon/ or orthopedic surgeon/ or pediatric surgeon/ or plastic surgeon/ or thoracic surgeon/ or transplant surgeon/ or trauma surgeon/ or vascular surgeon/ or oncologist/ or gynecologic oncologist/ or hematologist-oncologist/ or medical oncologist/ or orthopedic oncologist/ or pediatric oncologist/ or radiation oncologist/ or surgical oncologist/ or gynecologist/ or fertility specialist/ or gynecologic oncologist/ or urogynecologist/ or endoscopist/ or bronchoscopist/ or laparoscopist/ or ophthalmologist/ or orthoptist/ or audiologist/ or dietitian/ or endoscopist/ or lactation consultant/ or midwife/ or occupational therapist/ or occupational therapy assistant/ or phlebotomist/ or physiotherapist/ or physiotherapist assistant/ or radiographer/ or respiratory therapist/ or sonographer/ or speech language pathologist/</p> |
| 4 | <p>Students, Health Occupations/ or clinical clerkship/ or "internship and residency"/ or preceptorship/ or students, medical/ or students, nursing/ or medical student/ or resident/ or paramedical student/ or physician assistant student/ or health student/ or nursing student/ or baccalaureate nursing student/ or graduate nursing student/ or male nursing student/ or allied health student/ or audiology student/ or dental hygiene student/ or dental student/ or dietetics student/ or midwifery student/ or nursing student/ or occupational therapy student/ or physical therapy student/ or respiratory therapy student/ or medical registrar/ or general practise registrar/ or specialist registrar/ or surgical registrar/</p>                                                                                                                                                                                                                                                                                                                                                                                                                                                                                                                                                                                                                                                                                                                                                                                                                                                                                                                                                                      |
| 5 | <p>(physician? or doctor? or nurse? or clinician? or specialist? or practitioner? or hospital-personnel or health-care-personnel or healthcare-personnel or medical-staff or medical-resident? or advanced-practice-provider* or advanced-practice-professional? or care-coordinator* or allied-health-provider? or allied-health-personnel or allied-health-worker? or allied-health-staff or allied-health-employee? or clinical-associate? or health-personnel or medical-personnel or paramedic? or paramedical-professional? or paramedical-personnel or paramedical-worker? or paramedical-employee? or paramedical-staff? or paramedical-assistant? or registrar? or trainee-intern* or house-officer* or medical-officer? or case-manager* or midwif* or midwif* or</p>                                                                                                                                                                                                                                                                                                                                                                                                                                                                                                                                                                                                                                                                                                                                                                                                                                                                                                                                        |

PREDICTORS OF PHYSICIAN COMPASSION: A SYSTEMATIC REVIEW

|    |                                                                                                                                                                                                                                                                                                                                                                                                                                                                                                                                                                                                                                                                                                                                                                                                                                                                                                                                                                                                                                                                                                                                                                                                                                                                                                                                                                                                                                     |
|----|-------------------------------------------------------------------------------------------------------------------------------------------------------------------------------------------------------------------------------------------------------------------------------------------------------------------------------------------------------------------------------------------------------------------------------------------------------------------------------------------------------------------------------------------------------------------------------------------------------------------------------------------------------------------------------------------------------------------------------------------------------------------------------------------------------------------------------------------------------------------------------------------------------------------------------------------------------------------------------------------------------------------------------------------------------------------------------------------------------------------------------------------------------------------------------------------------------------------------------------------------------------------------------------------------------------------------------------------------------------------------------------------------------------------------------------|
|    | healthcare-professional? or medical-professional? or health-care-professional? or consultant? or trainee? or intern? or resident? or student? or trainee-intern? or clinical-clerk? or medical-staff or healthcare-staff or hospital-staff or health-care-staff or hospital-staff or nursing-staff or medical-expert? or health-expert? or healthcare-expert? or health-care-expert? or medical-assistant? or healthcare-assistant or health-care-assistant or medical-worker? or health-worker? or healthcare-worker? or health-care-worker? or hospital-worker? or medical-employee? or health-employee? or healthcare-employee? or health-care-employee? or hospital-employee? or health-visitor or case-manager? or first-assistant? or nursing-assistant? or radiologist-assistant? or dental-personnel or dental-staff or dental-care-provider? or dental-care-professional? or dental-professional? or eye-care-professional? or eyecare-professional? or mid-level-provider? or non-physician-provider? or physician-extender?).ti,ab,kw.                                                                                                                                                                                                                                                                                                                                                                                   |
| 6  | (anesthetist? or anesthesiologist? or anaesthetist? or anaesthesiologist? or audiologist? or dental-staff or dentist? or hospitalist? or nursing-staff or nutritionist? or therapist? or optometrist? or allergist? or cardiologist? or dermatologist? or endocrinologist? or gastroenterologist? or geriatrician? or nephrologist? or neurologist? or oncologist? or ophthalmologist? or Otolaryngologist? or pediatrician? or paediatrician? or neonatologist? or physiatrist? or pulmonologist? or radiologist? or rheumatologist? or surgeon? or neurosurgeon? or urologist? or andrologist? or diabetologist? or gerontologist? or gynecologist? or gynaecologist? or haematologist? or hematologist? or hepatologist? or immunologist? or intensivist? or internist? or geneticist? or obstetrician? or pathologist? or phlebologist? or podiatrist? or vaccinologist? or orthotist? or prosthetist? or transplant-coordinator? or radiologist? or neuroradiologist? or roentgenologist? or rontgenologist? or radiographer? or radiotherapist? or neurosurgeon? or urogynecologist? or endoscopist? or bronchoscopist? or laparoscopist? or orthoptist? or orthopaedist? or orthopedist? or dietitian? or occupational-therapist? or occupational-therapy-assistant? or phlebotomist? or physiotherapist? or physiotherapist-assistant? or respiratory-therapist? or sonographer? or speech-language-pathologist?).ti,ab,kw. |
| 7  | or/1-6                                                                                                                                                                                                                                                                                                                                                                                                                                                                                                                                                                                                                                                                                                                                                                                                                                                                                                                                                                                                                                                                                                                                                                                                                                                                                                                                                                                                                              |
| 8  | empathy/ or compassion fatigue/                                                                                                                                                                                                                                                                                                                                                                                                                                                                                                                                                                                                                                                                                                                                                                                                                                                                                                                                                                                                                                                                                                                                                                                                                                                                                                                                                                                                     |
| 9  | (compassion or compassionate or empathy or empathetic or empathic or compassion-fatigue or empathy-fatigue or motivation-to-help* or desire-to-help* or kindness or prosocial-attitude? or prosocial-behavior? or prosocial-behaviour? or prosocial-concern or prosocial-motivation).ti,kw.                                                                                                                                                                                                                                                                                                                                                                                                                                                                                                                                                                                                                                                                                                                                                                                                                                                                                                                                                                                                                                                                                                                                         |
| 10 | or/8-9                                                                                                                                                                                                                                                                                                                                                                                                                                                                                                                                                                                                                                                                                                                                                                                                                                                                                                                                                                                                                                                                                                                                                                                                                                                                                                                                                                                                                              |
| 11 | (factor? or influenc* or affect* or hinder* or caus* or facilitator? or barrier? or antecedent* or precursor* or challenge? or impact* or                                                                                                                                                                                                                                                                                                                                                                                                                                                                                                                                                                                                                                                                                                                                                                                                                                                                                                                                                                                                                                                                                                                                                                                                                                                                                           |

## PREDICTORS OF PHYSICIAN COMPASSION: A SYSTEMATIC REVIEW

|    |                                                                                                                   |
|----|-------------------------------------------------------------------------------------------------------------------|
|    | predict* or facilitat* or interfer* or foster* or enhanc* or increas* or enabl* or worsen* or decreas*).ti,ab,kw. |
| 12 | 7 and 10 and 11                                                                                                   |
| 13 | limit 12 to "humans only (removes records about animals)"                                                         |

\* Note, that after a pilot study of 500 records we shifted the focus of this review from broadly defined healthcare professionals to medical doctors only (excluding pharmacists and dentists – another broad categories) as it became apparent that the numbers of studies outlining factors that affect compassion and compassion-related constructs for all healthcare professionals would be too high (i.e., circa 900-1000 studies). Large number of studies can compromise the quality of the evidence synthesis (1). Therefore, we have decided to focus on qualified physicians only, with a parallel review focusing on medical students.

### CINAHL (24.04.2021) (N=2160/1273)

S1

SU ( empathy or compassion or caring or "compassion fatigue" or "empathy fatigue" ) OR TI (compassion or compassionate or empathy or empathetic or empathic or "compassion fatigue" or "empathy fatigue" or "motivation to help\*" or "desire to help\*" or kindness or "prosocial attitude?" or "prosocial behavior?" or "prosocial behaviour?" or "prosocial concern" or "prosocial motivation") OR MW (compassion or compassionate or empathy or empathetic or empathic or "compassion fatigue" or "empathy fatigue" or "motivation to help\*" or "desire to help\*" or kindness or "prosocial attitude?" or "prosocial behavior?" or "prosocial behaviour?" or "prosocial concern" or "prosocial motivation")

S2

TI ( factor? OR influenc\* OR affect\* OR hinder\* OR caus\* OR facilitator? OR barrier? OR antecedent? OR precursor? OR challenge? OR impact\* OR predict\* OR facilitat\* OR interfer\* OR foster\* OR enhance\* OR increase\* OR enabl\* OR worsen\* OR decreas\* ) OR AB ( ffactor? OR influenc\* OR affect\* OR hinder\* OR caus\* OR facilitator? OR barrier? OR antecedent? OR precursor? OR challenge? OR impact\* OR predict\* OR facilitat\* OR interfer\* OR foster\* OR enhance\* OR increase\* OR enabl\* OR worsen\* OR decreas\* ) OR MW ( factor? OR influenc\* OR affect\* OR hinder\* OR caus\* OR facilitator? OR barrier? OR antecedent? OR precursor? OR challenge? OR impact\* OR predict\* OR facilitat\* OR interfer\* OR foster\* OR enhance\* OR increase\* OR enabl\* OR worsen\* OR decreas\* )

S3

TI ( anesthetist? or anesthesiologist? or anaesthetist? or anaesthesiologist? or audiologist? or "dental staff" or dentist? or hospitalist? or "nursing staff" or nutritionist? or therapist? or optometrist? or allergist? or cardiologist? or dermatologist? or endocrinologist? or gastroenterologist? or geriatrician? or nephrologist? or neurologist? or oncologist? or ophthalmologist? or Otolaryngologist? or pediatrician? or paediatrician? or neonatologist? or physiatrist? or pulmonologist? or radiologist? or rheumatologist? or surgeon? or neurosurgeon? or urologist? or andrologist? or diabetologist? or gerontologist? or gynecologist? or gynaecologist? or haematologist? or hematologist? or hepatologist? or immunologist? or intensivist? or internist? or geneticist? or obstetrician? or pathologist? or phlebologist? or podiatrist? or vaccinologist? or orthotist? or prosthetist? or "transplant coordinator?" or radiologist? or neuroradiologist? or roentgenologist? or rontgenologist? or radiographer? or radiotherapist? or neurosurgeon? or urogynecologist? or endoscopist? or bronchoscopist? or laparoscopist? or orthoptist? or orthopaedist? or orthopedist? or dietitian? or "occupational therapist?" or "occupational therapy assistant?" or phlebotomist? or physiotherapist? or "physiotherapist assistant?" or "respiratory therapist?" or sonographer? or "speech language pathologist?" or physician? or doctor? or nurse? or clinician? or specialist? or practitioner? or "hospital

## PREDICTORS OF PHYSICIAN COMPASSION: A SYSTEMATIC REVIEW

personnel” or “health care personnel” or “healthcare personnel” or “medical staff” or “medical resident?” or “advanced practice provider\*” or “advanced practice professional?” or “care coordinator\*” or “allied health provider?” or “allied health personnel” or “allied health worker?” or “allied health staff” or “allied health employee?” or “clinical associate?” or “health personnel” or “medical personnel” or paramedic? or “paramedical professional?” or “paramedical personnel” or “paramedical worker?” or “paramedical employee?” or “paramedical staff?” or “paramedical assistant?” or “registrar?” or “trainee intern\*” or “house officer\*” or “medical officer?” or “case manager\*” or midwiv\* or midwif\* or “healthcare professional?” or “medical professional?” or “health care professional?” or consultant? or trainee? or intern? or resident? or student? or “trainee intern?” or “clinical clerk?” or “medical staff” or “healthcare staff” or “hospital staff” or “health care staff” or “hospital staff” or “nursing staff” or “medical expert?” or “health expert?” or “healthcare expert?” or “health care expert?” or “medical assistant?” or “healthcare assistant” or “health care assistant” or “medical worker?” or “health worker?” or “healthcare worker?” or “health care worker?” or “hospital worker?” or “medical employee?” or “health employee?” or “healthcare employee?” or “health care employee?” or “hospital employee?” or “health visitor” or “case manager?” or “first assistant?” or “nursing assistant?” or “radiologist assistant?” or “dental personnel” or “dental staff” or “dental care provider?” or “dental care professional?” or “dental professional?” or “eye care professional?” or “eyecare professional?” or “mid level provider?” or “non physician provider?” or “physician extender?” ) OR AB ( anesthetist? or anesthesiologist? or anaesthetist? or anaesthesiologist? or audiologist? or dental staff or dentist? or hospitalist? or “nursing staff” or nutritionist? or therapist? or optometrist? or allergist? or cardiologist? or dermatologist? or endocrinologist? or gastroenterologist? or geriatrician? or nephrologist? or neurologist? or oncologist? or ophthalmologist? or Otolaryngologist? or pediatrician? or paediatrician? or neonatologist? or physiatrist? or pulmonologist? or radiologist? or rheumatologist? or surgeon? or neurosurgeon? or urologist? or andrologist? or diabetologist? or gerontologist? or gynecologist? or gynaecologist? or haematologist? or hematologist? or hepatologist? or immunologist? or intensivist? or internist? or geneticist? or obstetrician? or pathologist? or phlebologist? or podiatrist? or vaccinologist? or orthotist? or prosthetist? or transplant coordinator? or radiologist? or neuroradiologist? or roentgenologist? or rontgenologist? radiographer? or radiotherapist? or neurosurgeon? or urogynecologist? or endoscopist? or bronchoscopist? or laparoscopist? or orthoptist? or orthopaedist? or orthopedist? or dietitian? or “occupational therapist?” or “occupational therapy assistant?” or phlebotomist? or physiotherapist? or “physiotherapist assistant?” or “respiratory therapist?” or sonographer? or “speech language pathologist?” or physician? or doctor? or nurse? or clinician? or specialist? or practitioner? or “hospital personnel” or “health care personnel” or “healthcare personnel” or “medical staff” or “medical resident?” or “advanced practice provider\*” or “advanced practice professional?” or “care coordinator\*” or “allied health provider?” or “allied health personnel” or “allied health worker?” or “allied health staff” or “allied health employee?” or “clinical associate?” or “health personnel” or “medical personnel” or paramedic? or “paramedical professional?” or “paramedical personnel” or “paramedical worker?” or “paramedical employee?” or “paramedical staff?” or “paramedical assistant?” or “registrar?” or “trainee intern\*” or “house officer\*” or “medical officer?” or “case manager\*” or midwiv\* or midwif\* or “healthcare professional?” or “medical professional?” or “health care professional?” or consultant? or trainee? or intern? or resident? or student? or “trainee intern?” or “clinical clerk?” or “medical staff” or “healthcare staff” or “hospital staff” or “health care staff” or “hospital staff” or “nursing staff” or “medical expert?” or “health expert?” or “healthcare expert?” or “health care expert?” or “medical assistant?” or “healthcare assistant” or “health care assistant” or “medical worker?” or “health worker?” or “healthcare worker?” or “health care worker?” or “hospital worker?” or “medical employee?” or “health employee?” or “healthcare employee?” or “health care employee?” or “hospital employee?” or “health visitor” or “case manager?” or “first assistant?” or “nursing assistant?” or “radiologist assistant?” or “dental personnel” or “dental staff” or “dental care provider?” or “dental care professional?” or “dental professional?” or “eye care professional?” or “eyecare professional?” or “mid level provider?” or “non physician provider?” or “physician extender?” ) OR MW ( anesthetist? or anesthesiologist? or anaesthetist? or anaesthesiologist? or audiologist? or dental staff or dentist? or hospitalist? or “nursing staff” or nutritionist? or therapist? or optometrist? or allergist? or cardiologist? or dermatologist? or endocrinologist? or gastroenterologist? or geriatrician? or nephrologist? or neurologist? or oncologist? or ophthalmologist? or Otolaryngologist? or pediatrician? or paediatrician? or neonatologist? or physiatrist? or pulmonologist? or radiologist? or rheumatologist? or surgeon? or neurosurgeon? or urologist? or andrologist? or diabetologist? or gerontologist? or gynecologist? or gynaecologist? or haematologist? or hematologist? or hepatologist? or immunologist? or intensivist? or internist? or geneticist? or obstetrician? or pathologist? or phlebologist? or podiatrist? or vaccinologist? or orthotist? or prosthetist? or transplant coordinator? or radiologist? or neuroradiologist? or

## PREDICTORS OF PHYSICIAN COMPASSION: A SYSTEMATIC REVIEW

roentgenologist? or rontgenologist? radiographer? or radiotherapist? or neurosurgeon? or urogynecologist? or endoscopist? or bronchoscopist? or laparoscopist? or orthoptist? or orthopaedist? or orthopedist? or dietitian? or "occupational therapist?" or "occupational therapy assistant?" or phlebotomist? or physiotherapist? or "physiotherapist assistant?" or "respiratory therapist?" or sonographer? or "speech language pathologist?" or physician? or doctor? or nurse? or clinician? or specialist? or practitioner? or "hospital personnel" or "health care personnel" or "healthcare personnel" or "medical staff" or "medical resident?" or "advanced practice provider\*" or "advanced practice professional?" or "care coordinator\*" or "allied health provider?" or "allied health personnel" or "allied health worker?" or "allied health staff" or "allied health employee?" or "clinical associate?" or "health personnel" or "medical personnel" or paramedic? or "paramedical professional?" or "paramedical personnel" or "paramedical worker?" or "paramedical employee?" or "paramedical staff?" or "paramedical assistant?" or "registrar?" or "trainee intern\*" or "house officer\*" or "medical officer?" or "case manager\*" or midwif\* or midwif\* or "healthcare professional?" or "medical professional?" or "health care professional?" or consultant? or trainee? or intern? or resident? or student? or "trainee intern?" or "clinical clerk?" or "medical staff" or "healthcare staff" or "hospital staff" or "health care staff" or "hospital staff" or "nursing staff" or "medical expert?" or "health expert?" or "healthcare expert?" or "health care expert?" or "medical assistant?" or "healthcare assistant" or "health care assistant" or "medical worker?" or "health worker?" or "healthcare worker?" or "health care worker?" or "hospital worker?" or "medical employee?" or "health employee?" or "healthcare employee?" or "health care employee?" or "hospital employee?" or "health visitor" or "case manager?" or "first assistant?" or "nursing assistant?" or "radiologist assistant?" or "dental personnel" or "dental staff" or "dental care provider?" or "dental care professional?" or "dental professional?" or "eye care professional?" or "eyecare professional?" or "mid level provider?" or "non physician provider?" or "physician extender?" )

S1 AND S2 AND S3

*Limiters - English Language; Exclude MEDLINE records; Human;*

*Expanders - Apply equivalent subjects*

*Search modes - Boolean/Phrase*

### **Cochrane Libraries (including CENTRAL) (N=453/90)**

Last Saved: 24/04/2020 16:59:26

ID Search

- #1 MeSH descriptor: [Empathy] explode all trees
- #2 MeSH descriptor: [Compassion Fatigue] explode all trees
- #3 compassion or compassionate or empathy or empathetic or empathic or "compassion fatigue" or "empathy fatigue" or "motivation to help\*" or "desire to help\*" or kindness or "prosocial attitude?" or "prosocial behavior?" or "prosocial behaviour?" or "prosocial concern" or "prosocial motivation"
- #4 factor? or influenc\* or affect\* or hinder\* or caus\* or facilitator? or barrier? or antecedent\* or precursor\* or challenge? or impact\* or predict\* or facilitat\* or interfer\* or foster\* or enhanc\* or increas\* or enabl\* or worsen\* or decreas\*
- #5 anesthetist? OR anesthesiologist? OR anaesthetist? OR anaesthesiologist? OR audiologist? OR "dental staff" OR dentist? OR hospitalist? OR "nursing staff" OR nutritionist? OR therapist? OR optometrist? OR allergist? OR cardiologist? OR dermatologist? OR endocrinologist? OR gastroenterologist? OR geriatrician? OR nephrologist? OR neurologist? OR oncologist? OR ophthalmologist? OR Otolaryngologist? OR pediatrician? OR paediatrician? OR neonatologist? OR physiatrist? OR pulmonologist? OR radiologist? OR rheumatologist? OR surgeon? OR neurosurgeon? OR urologist? OR andrologist? OR diabetologist? OR gerontologist? OR gynecologist? OR gynaecologist? OR haematologist? OR hematologist? OR hepatologist? OR immunologist? OR intensivist? OR internist? OR geneticist? OR obstetrician? OR pathologist? OR phlebologist? OR podiatrist?

## PREDICTORS OF PHYSICIAN COMPASSION: A SYSTEMATIC REVIEW

OR vaccinologist? OR orthotist? OR prosthetist? OR “transplant coordinator?” OR radiologist? OR neuroradiologist? OR roentgenologist? OR rontgenologist? Or radiographer? OR radiotherapist? OR neurosurgeon? OR urogynecologist? OR endoscopist? OR bronchoscopist? OR laparoscopist? OR orthoptist? OR orthopaedist? OR orthopedist? OR dietitian? OR “occupational therapist?” OR “occupational therapy assistant?” OR phlebotomist? OR physiotherapist? OR “physiotherapist assistant?” OR “respiratory therapist?” OR sonographer? OR “speech language pathologist?” OR physician? OR doctor? OR nurse? OR clinician? OR specialist? OR practitioner? OR “hospital personnel” OR “health care personnel” OR “healthcare personnel” OR “medical staff” OR “medical resident?” OR “advanced practice provider\*” OR “advanced practice professional?” OR “care coordinator\*” OR “allied health provider?” OR “allied health personnel” OR “allied health worker?” OR “allied health staff” OR “allied health employee?” OR “clinical associate?” OR “health personnel” OR “medical personnel” OR paramedic? OR “paramedical professional?” OR “paramedical personnel” OR “paramedical worker?” OR “paramedical employee?” OR “paramedical staff?” OR “paramedical assistant?” OR “registrar?” OR “trainee intern\*” OR “house officer\*” OR “medical officer?” OR “case manager\*” OR midwif\* OR midwif\* OR “healthcare professional?” OR “medical professional?” OR “health care professional?” OR consultant? OR trainee? OR intern? OR resident? OR student? OR “trainee intern?” OR “clinical clerk?” OR “medical staff” OR “healthcare staff” OR “hospital staff” OR “health care staff” OR “hospital staff” OR “nursing staff” OR “medical expert?” OR “health expert?” OR “healthcare expert?” OR “health care expert?” OR “medical assistant?” OR “healthcare assistant” OR “health care assistant” OR “medical worker?” OR “health worker?” OR “healthcare worker?” OR “health care worker?” OR “hospital worker?” OR “medical employee?” OR “health employee?” OR “healthcare employee?” OR “health care employee?” OR “hospital employee?” OR “health visitor” OR “case manager?” OR “first assistant?” OR “nursing assistant?” OR “radiologist assistant?” OR “dental personnel” OR “dental staff” OR “dental care provider?” OR “dental care professional?” OR “dental professional?” OR “eye care professional?” OR “eyecare professional?” OR “mid level provider?” OR “non physician provider?” OR “physician extender?”

#6 MeSH descriptor: [Health Personnel] this term only

#7 MeSH descriptor: [Case Management] explode all trees

#8 MeSH descriptor: [Medical Staff] this term only

#9 MeSH descriptor: [Medical Staff, Hospital] this term only

#10 MeSH descriptor: [Hospitalists] this term only

#11 MeSH descriptor: [Personnel, Hospital] this term only

#12 MeSH descriptor: [General Practitioners] this term only

#13 MeSH descriptor: [Nursing] explode all trees

#14 MeSH descriptor: [Nurses] explode all trees

#15 MeSH descriptor: [Physicians] explode all trees

#16 MeSH descriptor: [Health Personnel] explode all trees

#17 MeSH descriptor: [Students, Health Occupations] explode all trees

#18 MeSH descriptor: [Clinical Clerkship] this term only

#19 MeSH descriptor: [Internship and Residency] this term only

#20 MeSH descriptor: [Preceptorship] this term only

#21 #1 or #2 or #3

#22 #5 or #6 or #7 or #8 or #9 or #10 or #11 or #12 or #13 or #14 or #15 or #16 or #17 or #18 or #19 or #20

#26 #4 and #21 and #22



## PREDICTORS OF PHYSICIAN COMPASSION: A SYSTEMATIC REVIEW

Scopus (24.04.2020) (N=7481/1640)

(( TITLE-ABS-KEY ( anesthetist? OR anesthesiologist? OR anaesthetist? OR anaesthesiologist? OR audiologist? OR "dental staff" OR dentist? OR hospitalist? OR "nursing staff" OR nutritionist? OR therapist? OR optometrist? OR allergist? OR cardiologist? OR dermatologist? OR endocrinologist? OR gastroenterologist? OR geriatrician? OR nephrologist? OR neurologist? OR oncologist? OR ophthalmologist? OR otolaryngologist? OR pediatrician? OR paediatrician? OR neonatologist? OR physiatrist? OR pulmonologist? OR radiologist? OR rheumatologist? OR surgeon? OR neurosurgeon? OR urologist? OR andrologist? OR diabetologist? OR gerontologist? OR gynecologist? OR gynaecologist? OR haematologist? OR hematologist? OR hepatologist? OR immunologist? OR intensivist? OR internist? OR geneticist? OR obstetrician? OR pathologist? OR phlebologist? OR podiatrist? OR vaccinologist? OR orthotist? OR prosthetist? OR "transplant coordinator" OR radiologist? OR neuroradiologist? OR roentgenologist? OR rontgenologist? OR radiographer? OR radiotherapist? OR neurosurgeon? OR urogynecologist? OR endoscopist? OR bronchoscopist? OR laparoscopist? OR orthoptist? OR orthopaedist? OR orthopedist? OR dietitian? OR "occupational therapist" OR "occupational therapy assistant" OR phlebotomist? OR physiotherapist? OR "physiotherapist assistant" OR "respiratory therapist" OR sonographer? OR "speech language pathologist" OR physician? OR doctor? OR nurse? OR clinician? OR specialist? OR practitioner? OR "hospital personnel" OR "health care personnel" OR "healthcare personnel" OR "medical staff" OR "medical resident" OR "advanced practice provider" OR "advanced practice professional" OR "care coordinator" OR "allied health provider" OR "allied health personnel" OR "allied health worker" OR "allied health staff" OR "allied health employee" OR "clinical associate" OR "health personnel" OR "medical personnel" OR paramedic? OR "paramedical professional" OR "paramedical personnel" OR "paramedical worker" OR "paramedical employee" OR "paramedical staff" OR "paramedical assistant" OR registrar? OR "trainee intern" OR "house officer" OR "medical officer" OR "case manager" OR midwiv\* OR midwif\* OR "healthcare professional" OR "medical professional" OR "health care professional" OR consultant? OR trainee? OR intern? OR resident? OR student? OR "trainee intern" OR "clinical clerk" OR "medical staff" OR "healthcare staff" OR "hospital staff" OR "health care staff" OR "hospital staff" OR "nursing staff" OR "medical expert" OR "health expert" OR "healthcare expert" OR "health care expert" OR "medical assistant" OR "healthcare assistant" OR "health care assistant" OR "medical worker" OR "health worker" OR "healthcare worker" OR "health care worker" OR "hospital worker" OR "medical employee" OR "health employee" OR "healthcare employee" OR "health care employee" OR "hospital employee" OR "health visitor" OR "case manager" OR "first assistant" OR "nursing assistant" OR "radiologist assistant" OR "dental personnel" OR "dental staff" OR "dental care provider" OR "dental care professional" OR "dental professional" OR "eye care professional" OR "eyecare professional" OR "mid level provider" OR "non physician provider" OR "physician extender" )) AND ( TITLE ( compassion OR compassionate OR empathy OR empathetic OR empathic OR "compassion fatigue" OR "empathy fatigue" OR "motivation to help" OR "desire to help" OR kindness OR "prosocial attitude" OR "prosocial behavior" OR "prosocial behaviour" OR "prosocial concern" OR "prosocial motivation" ) OR KEY ( compassion OR compassionate OR empathy OR empathetic OR empathic OR "compassion fatigue" OR "empathy fatigue" OR "motivation to help" OR "desire to help" OR kindness OR "prosocial attitude" OR "prosocial behavior" OR "prosocial behaviour" OR "prosocial concern" OR "prosocial motivation" )) ) AND ( TITLE-ABS-KEY ( factor? OR influenc\* OR affect\* OR hinder\* OR caus\* OR facilitator? OR barrier? OR antecedent? OR precursor? OR

## PREDICTORS OF PHYSICIAN COMPASSION: A SYSTEMATIC REVIEW

challenge? OR impact\* OR predict\* OR facilitat\* OR interfer\* OR foster\* OR enhance\* OR increase\* OR enabl\* OR worsen\* OR decrease\* ) ) AND ( LIMIT-TO ( LANGUAGE , "English" ) )

**Web of Science (24.04.2020) (N=2062/756)**

|           |                                                                                                                                                                                                                                                                                                                                                                                                                                                                                                                                                                                                                                                                                                                                                                                                                                                                                                                                                                                                                                                                                                                                                                                                                                                                                                                                                                                                                                                                                                                                      |
|-----------|--------------------------------------------------------------------------------------------------------------------------------------------------------------------------------------------------------------------------------------------------------------------------------------------------------------------------------------------------------------------------------------------------------------------------------------------------------------------------------------------------------------------------------------------------------------------------------------------------------------------------------------------------------------------------------------------------------------------------------------------------------------------------------------------------------------------------------------------------------------------------------------------------------------------------------------------------------------------------------------------------------------------------------------------------------------------------------------------------------------------------------------------------------------------------------------------------------------------------------------------------------------------------------------------------------------------------------------------------------------------------------------------------------------------------------------------------------------------------------------------------------------------------------------|
| #7 AND #2 | <i>Indexes=SCI-EXPANDED, SSCI, A&amp;HCI, CPCI-S, CPCI-SSH, BKCI-S, BKCI-SSH, ESCI Timespan=All years</i>                                                                                                                                                                                                                                                                                                                                                                                                                                                                                                                                                                                                                                                                                                                                                                                                                                                                                                                                                                                                                                                                                                                                                                                                                                                                                                                                                                                                                            |
| # 7       | #6 AND #3<br><i>Indexes=SCI-EXPANDED, SSCI, A&amp;HCI, CPCI-S, CPCI-SSH, BKCI-S, BKCI-SSH, ESCI Timespan=All years</i>                                                                                                                                                                                                                                                                                                                                                                                                                                                                                                                                                                                                                                                                                                                                                                                                                                                                                                                                                                                                                                                                                                                                                                                                                                                                                                                                                                                                               |
| # 6       | (TS=(compassion OR compassionate OR empathy OR empathetic OR empathic OR "compassion fatigue" OR "empathy fatigue" OR "motivation to help*" OR "desire to help"* OR kindness OR "prosocial attitude?" OR "prosocial behavior?" OR "prosocial behaviour?" OR "prosocial concern" OR "prosocial motivation" ) ) AND LANGUAGE: (English)<br><i>Indexes=SCI-EXPANDED, SSCI, A&amp;HCI, CPCI-S, CPCI-SSH, BKCI-S, BKCI-SSH, ESCI Timespan=All years</i>                                                                                                                                                                                                                                                                                                                                                                                                                                                                                                                                                                                                                                                                                                                                                                                                                                                                                                                                                                                                                                                                                   |
| # 5       | #4 AND #2<br><i>Indexes=SCI-EXPANDED, SSCI, A&amp;HCI, CPCI-S, CPCI-SSH, BKCI-S, BKCI-SSH, ESCI Timespan=All years</i>                                                                                                                                                                                                                                                                                                                                                                                                                                                                                                                                                                                                                                                                                                                                                                                                                                                                                                                                                                                                                                                                                                                                                                                                                                                                                                                                                                                                               |
| # 4       | #3 AND #1<br><i>Indexes=SCI-EXPANDED, SSCI, A&amp;HCI, CPCI-S, CPCI-SSH, BKCI-S, BKCI-SSH, ESCI Timespan=All years</i>                                                                                                                                                                                                                                                                                                                                                                                                                                                                                                                                                                                                                                                                                                                                                                                                                                                                                                                                                                                                                                                                                                                                                                                                                                                                                                                                                                                                               |
| # 3       | (TS=(anesthetist? OR anesthesiologist? OR anaesthetist? OR anaesthesiologist? OR audiologist? OR "dental staff" OR dentist? OR hospitalist? OR "nursing staff" OR nutritionist? OR therapist? OR optometrist? OR allergist? OR cardiologist? OR dermatologist? OR endocrinologist? OR gastroenterologist? OR geriatrician? OR nephrologist? OR neurologist? OR oncologist? OR ophthalmologist? OR Otolaryngologist? OR pediatrician? OR paediatrician? OR neonatologist? OR physiatrist? OR pulmonologist? OR radiologist? OR rheumatologist? OR surgeon? OR neurosurgeon? OR urologist? OR andrologist? OR diabetologist? OR gerontologist? OR gynecologist? OR gynaecologist? OR haematologist? OR hematologist? OR hepatologist? OR immunologist? OR intensivist? OR internist? OR geneticist? OR obstetrician? OR pathologist? OR phlebologist? OR podiatrist? OR vaccinologist? OR orthotist? OR prosthetist? OR "transplant coordinator" OR radiologist? OR neuroradiologist? OR roentgenologist? OR rontgenologist? OR radiographer? OR radiotherapist? OR neurosurgeon? OR urogynecologist? OR endoscopist? OR bronchoscopist? OR laparoscopist? OR orthoptist? OR orthopaedist? OR orthopedist? OR dietitian? OR "occupational therapist" OR "occupational therapy assistant" OR phlebotomist? OR physiotherapist? OR "physiotherapist assistant" OR "respiratory therapist" OR sonographer? OR "speech language pathologist" OR physician? OR doctor? OR nurse? OR clinician? OR specialist? OR practitioner? OR "hospital |

- personnel" OR "health care personnel" OR "healthcare personnel" OR "medical staff" OR "medical resident" OR "advanced practice provider" OR "advanced practice professional" OR "care coordinator" OR "allied health provider" OR "allied health personnel" OR "allied health worker" OR "allied health staff" OR "allied health employee" OR "clinical associate" OR "health personnel" OR "medical personnel" OR paramedic? OR "paramedical professional" OR "paramedical personnel" OR "paramedical worker" OR "paramedical employee" OR "paramedical staff" OR "paramedical assistant" OR registrar? OR "trainee intern" OR "house officer" OR "medical officer" OR "case manager" OR midwiv\* OR midwif\* OR "healthcare professional" OR "medical professional" OR "health care professional" OR consultant? OR trainee? OR intern? OR resident? OR student? OR "trainee intern" OR "clinical clerk" OR "medical staff" OR "healthcare staff" OR "hospital staff" OR "health care staff" OR "hospital staff" OR "nursing staff" OR "medical expert" OR "health expert" OR "healthcare expert" OR "health care expert" OR "medical assistant" OR "healthcare assistant" OR "health care assistant" OR "medical worker" OR "health worker" OR "healthcare worker" OR "health care worker" OR "hospital worker" OR "medical employee" OR "health employee" OR "healthcare employee" OR "health care employee" OR "hospital employee" OR "health visitor" OR "case manager" OR "first assistant" OR "nursing assistant" OR "radiologist assistant" OR "dental personnel" OR "dental staff" OR "dental care provider" OR "dental care professional" OR "dental professional" OR "eye care professional" OR "eyecare professional" OR "mid level provider" OR "non physician provider" OR "physician extender") ) **AND LANGUAGE:** (English)  
*Indexes=SCI-EXPANDED, SSCI, A&HCI, CPCI-S, CPCI-SSH, BKCI-S, BKCI-SSH, ESCI Timespan=All years*
- # 2 (TS=(factor? OR influenc\* OR affect\* OR hinder\* OR caus\* OR facilitator? OR barrier? OR antecedent? OR precursor? OR challenge? OR impact\* OR predict\* OR facilitat\* OR interfer\* OR foster\* OR enhance\* OR increase\* OR enabl\* OR worsen\* OR decrease\*) ) **AND LANGUAGE:** (English)  
*Indexes=SCI-EXPANDED, SSCI, A&HCI, CPCI-S, CPCI-SSH, BKCI-S, BKCI-SSH, ESCI Timespan=All years*
- # 1 (TI=(compassion OR compassionate OR empathy OR empathetic OR empathic OR "compassion fatigue" OR "empathy fatigue" OR "motivation to help\*" OR "desire to help"\* OR kindness OR "prosocial attitude?" OR "prosocial behavior?" OR "prosocial behaviour?" OR "prosocial concern" OR "prosocial motivation") ) **AND LANGUAGE:** (English)  
*Indexes=SCI-EXPANDED, SSCI, A&HCI, CPCI-S, CPCI-SSH, BKCI-S, BKCI-SSH, ESCI Timespan=All years*

## PREDICTORS OF PHYSICIAN COMPASSION: A SYSTEMATIC REVIEW

### ProQuest databases (24.04.2020) (N=2916/1522):

((((ti(compassion OR compassionate OR empathy OR empathetic OR empathic OR "compassion fatigue" OR "empathy fatigue" OR "motivation to help\*" OR "desire to help\*" OR kindness OR "prosocial attitude?" OR "prosocial behavior?" OR "prosocial behaviour?" OR "prosocial concern" OR "prosocial motivation") OR MESH.EXACT(compassion OR empathy OR "compassion fatigue"))) AND (noft(anesthetist? OR anesthesiologist? OR anaesthetist? OR anaesthesiologist? OR audiologist? OR "dental staff" OR dentist? OR hospitalist? OR "nursing staff" OR nutritionist? OR therapist? OR optometrist? OR allergist? OR cardiologist? OR dermatologist? OR endocrinologist? OR gastroenterologist? OR geriatrician? OR nephrologist? OR neurologist? OR oncologist? OR ophthalmologist? OR Otolaryngologist? OR pediatrician? OR paediatrician? OR neonatologist? OR physiatrist? OR pulmonologist? OR radiologist? OR rheumatologist? OR surgeon? OR neurosurgeon? OR urologist? OR andrologist? OR diabetologist? OR gerontologist? OR gynecologist? OR gynaecologist? OR haematologist? OR hematologist? OR hepatologist? OR immunologist? OR intensivist? OR internist? OR geneticist? OR obstetrician? OR pathologist? OR phlebologist? OR podiatrist? OR vaccinologist? OR orthotist? OR prosthetist? OR "transplant coordinator" OR radiologist? OR neuroradiologist? OR roentgenologist? OR rontgenologist? OR radiographer? OR radiotherapist? OR neurosurgeon? OR urogynecologist? OR endoscopist? OR bronchoscopist? OR laparoscopist? OR orthoptist? OR orthopaedist? OR orthopedist? OR dietitian? OR "occupational therapist" OR "occupational therapy assistant" OR phlebotomist? OR physiotherapist? OR "physiotherapist assistant" OR "respiratory therapist" OR sonographer? OR "speech language pathologist" OR physician? OR doctor? OR nurse? OR clinician? OR specialist? OR practitioner? OR "hospital personnel" OR "health care personnel" OR "healthcare personnel" OR "medical staff" OR "medical resident" OR "advanced practice provider" OR "advanced practice professional" OR "care coordinator" OR "allied health provider" OR "allied health personnel" OR "allied health worker" OR "allied health staff" OR "allied health employee" OR "clinical associate" OR "health personnel" OR "medical personnel" OR paramedic? OR "paramedical professional" OR "paramedical personnel" OR "paramedical worker" OR "paramedical employee" OR "paramedical staff" OR "paramedical assistant" OR registrar? OR "trainee intern" OR "house officer" OR "medical officer" OR "case manager" OR midwif\* OR midwif\* OR "healthcare professional" OR "medical professional" OR "health care professional" OR consultant? OR trainee? OR intern? OR resident? OR student? OR "trainee intern" OR "clinical clerk" OR "medical staff" OR "healthcare staff" OR "hospital staff" OR "health care staff" OR "hospital staff" OR "nursing staff" OR "medical expert" OR "health expert" OR "healthcare expert" OR "health care expert" OR "medical assistant" OR "healthcare assistant" OR "health care assistant" OR "medical worker" OR "health worker" OR "healthcare worker" OR "health care worker" OR "hospital worker" OR "medical employee" OR "health employee" OR "healthcare employee" OR "health care employee" OR "hospital employee" OR "health visitor" OR "case manager" OR "first assistant" OR "nursing assistant" OR "radiologist assistant" OR "dental personnel" OR "dental staff" OR "dental care provider" OR "dental care professional" OR "dental professional" OR "eye care professional" OR "eyecare professional" OR "mid level provider" OR "non physician provider" OR "physician extender") OR MESH.EXACT("health personnel" OR "case managers" OR "medical staff" OR "medical staff, hospital" OR "hospitalists" OR "personnel, hospital" OR "general practitioners" OR "nurses" OR "nurse practitioners" OR "family nurse practitioners" OR "pediatric nurse practitioners" OR "nurse specialists" OR "nurse clinicians" OR "nurse midwives" OR "nurses, pediatric" OR "nurses, neonatal" OR "nursing staff" OR "nursing staff, hospital" OR "physicians" OR "physicians, family" OR "physicians, primary care" OR "nurse anesthetists" OR "anesthetists" OR "anesthesiologists" OR "audiologists" OR "dental staff" OR "dental staff, hospital" OR "dentists" OR "nutritionists" OR "occupational therapists" OR "optometrists" OR "physical therapists" OR "allergists" OR "cardiologists" OR "dermatologists" OR "endocrinologists" OR "gastroenterologists" OR "geriatricians" OR "nephrologists" OR "neurologists" OR "occupational health physicians" OR "oncologists" OR "radiation oncologists" OR "ophthalmologists" OR "osteopathic physicians" OR "otolaryngologists" OR "pediatricians" OR "neonatologists" OR "physiatrists" OR "pulmonologists" OR "radiologists" OR "rheumatologists" OR "surgeons" OR "neurosurgeons" OR "orthopedic surgeons" OR "urologists")))) AND (noft(factor? OR influenc\* OR affect\* OR hinder\* OR caus\* OR facilitator? OR barrier? OR antecedent? OR precursor? OR challenge? OR impact\* OR predict\* OR facilitat\* OR interfer\* OR foster\* OR enhance\* OR increase\* OR enabl\* OR worsen\* OR decrease\*)) NOT la.exact("ENG"))

## PREDICTORS OF PHYSICIAN COMPASSION: A SYSTEMATIC REVIEW

ProQuest Databases searched:

- ProQuest Central
- ProQuest Dissertations and Global Theses: General, Social Sciences, Health & Medicine
- Health Research Primary Collection
- ERIC
- Nursing and Allied Healthcare Database
- Health and Medical Collection
- Research Library: General, Social Sciences, Health & Medicine
- Psychology Database
- Education Database
- Sociology Database
- Public Health Database
- Sociological Abstracts
- Social Services Abstracts
- IBSS
- PTSDpubs
- Social Science Database
- Consumer Health Database
- Healthcare Administration Database
- Australia & New Zealand Database
- Turkey Database
- Eastern Europe, Central Europe Database
- Middle East & Africa Database
- UK & Ireland Database
- India Database: General, Health & Medicine
- Latin America & Iberia Database
- GenderWatch

**eSupplement 3:** Extraction form data points

The following data points were collected via Qualtrics extraction forms.

|                            |                                                                                                                                                                                                                                                                                                                                                                                                                                                                                                                                                                      |
|----------------------------|----------------------------------------------------------------------------------------------------------------------------------------------------------------------------------------------------------------------------------------------------------------------------------------------------------------------------------------------------------------------------------------------------------------------------------------------------------------------------------------------------------------------------------------------------------------------|
| <b>General information</b> | <ul style="list-style-type: none"> <li>- Database</li> <li>- Author(s)</li> <li>- Source</li> <li>- Date of publication</li> <li>- Publication type</li> <li>- Study title</li> <li>- Study aim</li> </ul>                                                                                                                                                                                                                                                                                                                                                           |
| <b>Methodology</b>         | <ul style="list-style-type: none"> <li>- Study type (e.g., quantitative/qualitative/mixed methods)</li> <li>- Research design (e.g. correlation/association study, exposure, RCT)</li> <li>- Quantitative design (e.g. cross-sectional, longitudinal)</li> <li>- Data type (e.g. self-report/survey, interview, participant observation, behavioural assessment)</li> <li>- Method of analysis (e.g. thematic analysis, discourse analysis, regression, analysis of variance)</li> <li>- Sampling method</li> <li>- Response rate</li> <li>- Missing data</li> </ul> |
| <b>Constructs</b>          | <ul style="list-style-type: none"> <li>- Construct</li> <li>- Measurement/scale</li> </ul>                                                                                                                                                                                                                                                                                                                                                                                                                                                                           |
| <b>Participants</b>        | <ul style="list-style-type: none"> <li>- Participant type (e.g. physician, resident)</li> <li>- Number of participants/sample size</li> <li>- Gender representativeness (%female)</li> <li>- Ethnicity/race representativeness (%White)</li> <li>- Experience</li> <li>- Speciality</li> <li>- Patient type</li> </ul>                                                                                                                                                                                                                                               |
| <b>Context</b>             | <ul style="list-style-type: none"> <li>- Country</li> <li>- Multi-centre study</li> <li>- Primary/secondary or tertiary healthcare settings</li> <li>- Public or private institution</li> <li>- Urban or rural settings</li> <li>- Large/small/or medium hospital</li> </ul>                                                                                                                                                                                                                                                                                         |
| <b>Factors</b>             | <ul style="list-style-type: none"> <li>- Physician factors</li> <li>- Environmental factors</li> <li>- Patient and family factors</li> <li>- Clinical factors</li> </ul>                                                                                                                                                                                                                                                                                                                                                                                             |

### eSupplement 4: Risk of Bias and Quality Assessment.

#### Quantitative studies risk of bias

We used an adaptation of ROBINS-I because most of the ROBINS-I domains are congruent with other quality assessment tools for non-intervention studies (e.g. Quality Assessment Tool for Quantitative Studies – EPHPP<sup>8</sup>, Joanna Briggs Checklists<sup>9</sup>, CASP Checklist for Cohort studies<sup>10</sup>, NICE checklist for correlations and associations<sup>11</sup>, STROBE checklist for cross-sectional/cohort studies<sup>12</sup>). Namely, we used the following domains - 1, 2, 5, 6, 7 - for analytical cross-sectional studies, and all the domains for observational exposure studies and longitudinal or timeseries studies where we replace intervention with the appropriate exposure (e.g., time, exogenous factors, other exposures). Based on an a priori review of the relevant literature, gender and experience have been considered potential confounds. Potential confounding effects from time-based confounding (in longitudinal studies) or co-interventions were also assessed. While the authors of ROBINS-I tool recommend having a target study (i.e., a hypothetical randomized trial) in mind before the assessment, we were not able to do so as we anticipated high variation in study designs, including studies that would not be classified as trials.

The ROBINS-I tool assesses the following domains<sup>13</sup>:

1. **Confounding bias:** Are there common causes of the outcome of interest and a confounder?
2. **Selection bias:** Were there any eligible participants that were excluded that could affect outcomes?
3. **Bias due to classification of intervention:** Is there a chance that the intervention status/exposure was misclassified?
4. **Bias due to deviations from intended interventions:** were there deviations from the intended intervention/exposure beyond what would be expected in usual practice? What about intervention adherence?
5. **Bias due to missing data:** Were there any important data missing? Were any participants excluded due to missing data on intervention/exposure status?
6. **Bias in measurement of outcomes:** Could the outcome measure have been influenced by knowledge of the intervention/exposure/outcome received by either assessors or the participants? Were measurements comparable between groups? Were any systematic errors in measurement of the outcome related to intervention/exposure received?
7. **Bias in selection of the reported result:** Is the reported effect estimate likely to be selected, on the basis of the results, from multiple measurements, analyses, or subgroups?

We classified a study as having a low risk of bias if all of the domains of the study outcome are associated with low risk. We classified a study as having a moderate risk of bias if all of the domains of the study outcome are associated with low or moderate risk. We classified a study as having a serious risk of bias if the study contains a serious risk of bias in at least one domain, and critical if the study contains a critical risk of bias in at least one domain. If there is no clear indication that the study is at serious or critical risk of bias and there is a lack of information in one or more domains of bias that is unlikely to seriously alter the results, we classified the study as having no information sufficient to make a judgement.

### Qualitative studies risk of bias

We used the Critical Appraisal Skills Programme (CASP) quality assessment, to assess the risk of bias for qualitative studies<sup>14</sup>. Studies were given the weight of evidence (low, medium, high) based on (1) data collection, research design and implementation, and grounding of results in data (i.e. researcher reflexivity and accountability of personal bias, consistency and transparency assurance, verbatim narrative support of the findings), and (2) richness of data/analysis and privileging of the participants' explanatory models. Namely, the study was considered to have a low risk of bias when risk of bias was unclear, or could be evident in less than 2 domains; the study was considered to have a medium risk of bias when risk of bias was unclear, or could be evident in more than 2 but less than 4 domains; the study was considered to have a high risk of bias when risk of bias was unclear, or could be evident in more than 4 domains. Additionally, throughout the synthesis we kept in mind that different types of participants, and different contexts, could reflect differences in findings.

### Data synthesis

Following data collection and the assessment of risk of bias, we used the framework thematic synthesis approach<sup>15</sup> to analyse the data and synthesise the evidence. This approach can be characterised by synthesising the evidence according to a theoretical framework – here the TMPC – that we have selected a priori. The Cochrane Qualitative Review Methods Group recommends the framework thematic synthesis where the evidence is largely descriptive, rather than conceptual or already theorised.

Although many qualitative synthesis studies used purposive sampling strategy to deal with large quantities of data<sup>16</sup>, this systematic review strived to use the complete list of included works because our aim is also to quantify amount of literature per factor. In addition, using the TMPC framework helped in classifying the data. We were, however, sensitive to studies coherence and relevance in terms of construct (compassion vs related construct), context (physician seniority, speciality, patient type), as well as research design and risk of bias by applying GRADE-CERQual guidance<sup>17</sup>.

In application of the framework thematic synthesis, we used the following process. We first selected the framework during the protocol stage after brief familiarisation with data. After studying the framework in depth, all three review authors independently read the selected studies and iteratively applied the factors from selected studies onto the framework. During this process, the authors discussed the characteristics and the limits of each of the categories of the framework and created subcategories that emerged from the data. We have then created charts of the evidence, further rearranging the data according to framework (sub)categories by using Miro software. After the charting process, we independently mapped all the data via extraction tables. We then used the output tables for crystallization process. More precisely, being able to visualize the data within a framework allowed us to suspend the process of the detailed examination of the data, reflect on the final output of the analysis, and make final adjustments to the framework mapping<sup>18</sup>. We used the final synthesis to interpret the findings, describing the nature and the variability of the factors, and seeking associations between the framework themes in order to develop more robust explanations of the findings.

Although we considered a formal meta-analysis, establishing pooled effect measures for the factors affecting ECRC, we were not able to conduct such analyses because, with the exemption of gender, both the measures and the outcomes lacked coherence, while some



## PREDICTORS OF PHYSICIAN COMPASSION: A SYSTEMATIC REVIEW

domains lacked data adequacy. However, we summarized the effect of the factors with regards to its direction and narratively. More precisely, positive or negative factors were grouped if these had a significant positive or negative effect ( $p < 0.05$ ) or correlation (as defined by the authors of the study in question) with ECRC constructs, or when the factors were mentioned to have a positive or negative effect in qualitative studies. Factors mentioned in a study that did not show a significant effect ( $p < 0.05$ ) or correlation, or factors that were explicitly mentioned as unimportant in qualitative studies were reported as factors with no effect. We have only reported significant effects if these remained after authors' specified controls/confounders have been taken into account. For qualitative studies, we have only used the data from direct quotes (descriptive data), rather than interpretations by the study authors<sup>19</sup> to ensure we are only using 'first order constructs' or direct experiences and participants own interpretations of the environments<sup>20</sup>.

### Subgroup analysis

We have initially planned to implement a subgroup analysis of healthcare professionals by speciality and level of experience. However, due to low coherence of results and missing data, the subgroup analysis was not feasible.

### Assessment of confidence in the synthesis findings

The Grades of Recommendation, Assessment, Development, and Evaluation -Confidence in the Evidence from Qualitative Reviews (GRADE-CERQual or CERQual) approach<sup>15, 17</sup> was applied to assess confidence in the review findings. Each finding can receive a high, moderate, low or very low confidence rating. We graded the quality of evidence per TMPC domain, sub-domains, and separate pieces of evidence.

The CERQual framework assesses four components which may affect confidence in the evidence<sup>17</sup>:

- Methodological limitations of the included studies and how they are reflected in the synthesis
- Coherence of the synthesis findings
- Data adequacy - the degree of richness and quantity of the data supporting this review
- Relevance of the included studies to the review question

For each of these domains, we will downgrade the evidence from high quality by one level (for serious) or by two levels (for very serious). We will then use these domains to rate the overall quality of evidence for the primary outcome according to the following:

1. High quality: further research is very unlikely to change our confidence in the findings
2. Moderate quality: further research is likely to have an important impact on our confidence in the findings, and may change the findings
3. Low quality: further research is very likely to have an important impact on our confidence in the findings, and may change the findings, or

Very low quality: we are very uncertain about the finding

## PREDICTORS OF PHYSICIAN COMPASSION: A SYSTEMATIC REVIEW

### eSupplement 5: Theoretical studies

| authors                    | title                                                                                                                   | journal                                   | volume | issue | PublicationType | MainConstruct          | Sample                 |
|----------------------------|-------------------------------------------------------------------------------------------------------------------------|-------------------------------------------|--------|-------|-----------------|------------------------|------------------------|
| Kerasidou, 2020            | Artificial intelligence and the ongoing need for empathy, compassion and trust in healthcare                            | Bulletin of the World Health Organization | 98     | 4     | Journal article | Empathy/compassion     | HCPs                   |
| Liao, Lester & Cheng, 2019 | The Empathy Tank as a revised model for fostering empathy in medical education                                          | Medical Teacher                           | 41     | 1     | Journal article | Empathy                | Targeted at physicians |
| Donelli et al., 2018       | Empathic disconnection and the patient-physician relationship in clinical practice                                      | Italian Journal of Medicine               | 12     | 4     | Journal article | Empathic disconnection | Physicians             |
| Flores & Brown, 2018       | The changing place of care and compassion within the English NHS: an Eliasean perspective                               | Social Theory & Health                    | 16     | 2     | Journal article | Compassion             | HCPs                   |
| Gillies, 2018              | Compassion, medical humanities and medical education                                                                    | Education For Primary Care                | 29     | 2     | Journal article | Compassion             | HCPs                   |
| Rydon-Grange, 2018         | Psychological perspective on compassion in modern healthcare settings                                                   | Journal of Medical Ethics                 | 44     | 11    | Journal article | Compassionate care     | HCPs                   |
| Barratt, 2017              | Exploring how mindfulness and self-compassion can enhance compassionate care                                            | Nursing Standard                          | 31     | 21    | Journal article | Compassion             | HCPs                   |
| Ekman & Krasner, 2017      | Empathy in medicine: neuroscience, education and challenges                                                             | Medical Teacher                           | 39     | 2     | Journal article | Empathy                | Targeted at physicians |
| Hardy, 2017                | Empathizing with patients: the role of interaction and narratives in providing better patient care.                     | Empathy                                   |        |       |                 |                        | HCPs                   |
| Liao, 2017                 | The physician as person framework: How human nature impacts empathy, depression, burnout, and the practice of medicine. | Canadian Medical Education Journal        | 8      | 4     | Journal article | Empathy                | Physicians             |
| Schattner, 2017            | Residents' responsibilities: adopting a wider view                                                                      | Medical Teacher                           | 39     | 12    | Journal article | Empathy                | Residents              |

## PREDICTORS OF PHYSICIAN COMPASSION: A SYSTEMATIC REVIEW

| authors                            | title                                                                                                              | journal                                         | volume | issue | PublicationType | MainConstruct                | Sample                |      |
|------------------------------------|--------------------------------------------------------------------------------------------------------------------|-------------------------------------------------|--------|-------|-----------------|------------------------------|-----------------------|------|
| Baverstock & Finlay, 2016          | Maintaining compassion and preventing compassion fatigue: a practical guide                                        | Archives of Disease in Childhood                | 101    | 4     | Journal article | Compassion                   | Targeted at all HCPs? |      |
| Chadwick & Lown, 2016              | What do we need to do to sustain compassionate medical care?                                                       | Medicine (United Kingdom)                       | 44     | 10    | Journal article | Compassion                   | HCPs                  |      |
| Kerasidou & Horn, 2016             | Making space for empathy: supporting doctors in the emotional labour of clinical care                              | BMC Medical Ethics                              | 17     |       | Journal article | Empathy/emotional engagement | Targeted at doctors   |      |
| Lown, 2016                         | A social neuroscience-informed model for teaching and practising compassion in health care                         | Medical Education                               | 50     | 3     | Journal article | Compassion                   | HCPs in general       |      |
| Mills & Chapman, 2016              | Compassion and self-compassion in medicine: self-care for the caregiver.                                           | Australasian Medical Journal                    | 9      | 5     | Journal article | Compassion                   | HCPs                  |      |
| Wang, 2016                         | Smiling through clenched teeth: why compassion cannot be written into the rules                                    | Journal of Medical Ethics                       | 42     | 1     | Journal article | Compassion                   | General - HCP         |      |
| George, 2015                       | Integrative medicine is integral to providing patient-centered care.                                               | Annals of Allergy, Asthma & Immunology          | 114    | 4     | Journal article | Patient-centred care         | Physicians            |      |
| Gray & Cox, 2015                   | The roots of compassion and empathy: implementing the Francis report and the search for new models of health care. | European Journal for Person Centered Healthcare | 3      | 1     | Journal article | Compassion, empathy          |                       |      |
| Gregory, 2015                      | William Pickles lecture 2014: cum scientia caritas - compassion with knowledge                                     | British Journal of General Practice             | 65     | 630   | Journal article | Compassion                   | Doctors in general    |      |
| Miles, Asbridge, & Caballero, 2015 | Towards a person-centered medical education: challenges and imperatives (I)                                        | Educacion Medica                                | 16     | 1     | Journal article | Patient-centred care         | Residents             |      |
| Navarro, 2015                      | At the crossroads of empathy and evidence in modern medicine                                                       | Empathy                                         |        |       |                 |                              |                       | HCPs |
| Bynum & Goodie, 2014               | Shame, guilt, and the medical learner: ignored connections and why we should care                                  | Medical Education                               | 48     | 11    | Journal article | Empathy                      | "Learners"            |      |
| Decety et al., 2014                | A social neuroscience perspective on clinical empathy                                                              | World Psychiatry                                | 13     | 3     | Journal article | Empathy                      | Physicians            |      |

## PREDICTORS OF PHYSICIAN COMPASSION: A SYSTEMATIC REVIEW

| authors                           | title                                                                                                                                           | journal                                           | volume | issue | PublicationType | MainConstruct                              | Sample                                                                |
|-----------------------------------|-------------------------------------------------------------------------------------------------------------------------------------------------|---------------------------------------------------|--------|-------|-----------------|--------------------------------------------|-----------------------------------------------------------------------|
| Fernando & Consedine, 2014        | Beyond compassion fatigue: the transactional model of physician compassion                                                                      | Journal of Pain and Symptom Management            | 48     | 2     | Journal article | Compassion                                 | HCPs                                                                  |
| Post et al., 2014                 | Routine, empathic and compassionate patient care: definitions, development, obstacles, education and beneficiaries                              | Journal of Evaluation in Clinical Practice        | 20     | 6     | Journal article | Empathy, compassionate care                | Physicians                                                            |
| de Zulueta, 2013                  | Compassion in 21st century medicine: Is it sustainable?                                                                                         | Clinical Ethics                                   | 8      | 4     | Journal article | Compassion                                 | Targeted at HCPs in general, mentions doctors and nurses specifically |
| Miles, 2013                       | Science, humanism, judgement, ethics: person-centered medicine as an emergent model of modern clinical practice.                                | Folia Medica                                      | 55     |       | Journal article | Person-centred medicine                    | Physicians                                                            |
| Rushton, Kaszniak & Halifax, 2013 | Addressing moral distress: application of a framework to palliative care practice                                                               | Journal of Palliative Medicine                    | 16     | 9     | Journal article | Empathy                                    | HCPs in general                                                       |
| Rushton, Kaszniak & Halifax, 2013 | A framework for understanding moral distress among palliative care clinicians                                                                   | Journal of Palliative Medicine                    | 16     | 9     | Journal article | Compassionate responding to moral distress | Aimed at all clinicians                                               |
| Smajdor, 2013                     | Reification and compassion in medicine: a tale of two systems.                                                                                  | Clinical Ethics                                   | 8      | 4     | Journal article | Compassion                                 | HCPs                                                                  |
| Halifax, 2012                     | A heuristic model of enactive compassion                                                                                                        | Current Opinion in Supportive and Palliative Care | 6      | 2     | Journal article | Compassion                                 | Clinicians NOS                                                        |
| Heusser et al., 2012              | Towards non-reductionistic medical anthropology, medical education and practitioner-patient-interaction: the example of anthroposophic medicine | Patient Education and Counseling                  | 89     | 3     | Journal article | Empathy                                    | Targeted at physicians                                                |

## PREDICTORS OF PHYSICIAN COMPASSION: A SYSTEMATIC REVIEW

| authors                       | title                                                                                                                                                   | journal                                    | volume | issue | PublicationType | MainConstruct        | Sample                            |
|-------------------------------|---------------------------------------------------------------------------------------------------------------------------------------------------------|--------------------------------------------|--------|-------|-----------------|----------------------|-----------------------------------|
| Mealem, Siniver & Yaniv, 2012 | Patient compliance, physician empathy and financial incentives within a principal-agent framework                                                       | The Journal of Socio-Economics             | 41     | 6     | Journal article | Empathetic behavior  | Physicians                        |
| Buckman, Tulsky & Rodin, 2011 | Empathic responses in clinical practice: intuition or tuition?                                                                                          | Canadian Medical Association Journal       | 183    | 5     | Journal article | Empathy              | HCPs                              |
| Cohen et al., 2011            | Stigmatization of patients with chronic pain: the extinction of empathy                                                                                 | Pain Medicine                              | 12     | 11    | Journal article | Empathy              | HCPs                              |
| Cox et al., 2011              | Empathy, identity and engagement in person-centred medicine: The sociocultural context                                                                  | Journal of Evaluation in Clinical Practice | 17     | 2     | Journal article | Empathy              | Medical practice                  |
| Zigmond, 2011                 | Five executive follies. How commodification imperils compassion in personal healthcare.                                                                 | Journal of Holistic Healthcare             | 8      | 3     | Journal article | Compassion           | HCPs                              |
| Abbott Moore, 2010            | Being empathetic: benefits and challenges for the clinician and client                                                                                  | Topics in stroke rehabilitation            | 17     | 1     | Journal article | Empathy              | Therapists                        |
| Finset, 2010                  | Emotions, narratives and empathy in clinical communication.                                                                                             | International Journal of Integrated Care   | 10     |       | Journal article | Empathy              | HCPs                              |
| Frampton & Guastello, 2010    | Patient-centered care: more than the sum of its parts.                                                                                                  | American Journal of Nursing                | 9      |       | Journal article | Patient-centred care |                                   |
| Pembroke, 2010                | Human dimension in medical care: insights from Buber and Marcel                                                                                         | Southern medical journal                   | 103    | 12    | Journal article | Compassion           | HCPs                              |
| Berwick, 2009                 | What 'patient-centered' should mean: confessions of an extremist.                                                                                       | Health Affairs                             | 28     | 4     | Journal article | Patient-centred care |                                   |
| Neumann et al., 2009          | Analyzing the "nature" and "specific effectiveness" of clinical empathy: a theoretical overview and contribution towards a theory-based research agenda | Patient education and counseling           | 74     | 3     | Journal article | Empathy              | HCPs                              |
| Banja et al., 2008            | Toward a more empathic relationship in pain medicine                                                                                                    | Pain Medicine                              | 9      | 8     | Journal article | Empathy              | Targeted at HCPs in pain medicine |
| Looi, 2008                    | Empathy and competence                                                                                                                                  | The Medical journal of Australia           | 188    | 7     | Journal article | Empathy              | HCPs                              |

## PREDICTORS OF PHYSICIAN COMPASSION: A SYSTEMATIC REVIEW

| authors                   | title                                                                                                           | journal                                    | volume | issue | PublicationType | MainConstruct                   | Sample                    |
|---------------------------|-----------------------------------------------------------------------------------------------------------------|--------------------------------------------|--------|-------|-----------------|---------------------------------|---------------------------|
| Sonnex, 2008              | Empathy: improving the quality of the genitourinary medicine consultation                                       | International journal of STD & AIDS        | 19     | 2     | Journal article | Empathy                         | Physicians                |
| Cohen, 2007               | Linking professionalism to humanism: what it means, why it matters                                              | Academic Medicine                          | 82     | 11    | Journal article | Humanism                        | HCPs                      |
| Macleod & McPherson, 2007 | Care and compassion: part of person-centred rehabilitation, inappropriate response or a forgotten art?          | Disability and Rehabilitation              | 29     | 20    | Journal article | Caring                          | Rehabilitation clinicians |
| Banja, 2006               | Empathy in the physician's pain practice: benefits, barriers, and recommendations                               | Pain medicine                              | 7      | 3     | Journal article | Empathy                         | HCPs                      |
| Hojat et al., 2003        | Physician empathy in medical education and practice: experience with the Jefferson Scale of Physician Empathy.  | Seminars in Integrative Medicine           | 1      |       | Journal article | Empathy                         | Physicians                |
| Charon, 2001              | The patient-physician relationship. Narrative medicine: a model for empathy, reflection, profession, and trust. | Academic Medicine                          | 286    | 15    | Journal article | Empathy                         | Physicians                |
| Coulehan et al., 2001     | "Let me see if i have this right.": words that help build empathy.                                              | Annals of Internal Medicine                | 135    |       | Journal article | Empathy                         | HCPs                      |
| Markakis et al., 2000     | The path to professionalism: cultivating humanistic values and attitudes in residency training.                 | Academic Medicine                          | 75     |       | Journal article | Humanistic values and attitudes | Residents                 |
| Miller & Schmidt, 1999    | The habit of humanism: a framework for making humanistic care a reflexive clinical skill.                       | Academic Medicine                          | 74     |       | Journal article | Humanistic care                 | HCPs                      |
| White, 1999               | Compassionate patient care and personal survival in orthopaedics. A 35-year perspective                         | Clinical Orthopaedics and Related Research |        |       |                 | Caring for patients             | Orthopaedics              |
| Neufeld, 1998             | Physician as humanist: still an educational challenge.                                                          | Cmaj                                       | 159    |       | Journal article | Humanism                        | Physicians                |
| Emanuel & Dubler, 1995    | Preserving the physician-patient relationship in the era of managed care                                        | JAMA                                       | 273    | 4     | Journal article | Compassion                      | HCPs                      |

## PREDICTORS OF PHYSICIAN COMPASSION: A SYSTEMATIC REVIEW

| authors                          | title                                                                              | journal                                   | volume | issue | PublicationType | MainConstruct | Sample                                               |
|----------------------------------|------------------------------------------------------------------------------------|-------------------------------------------|--------|-------|-----------------|---------------|------------------------------------------------------|
| Scott et al., 1995               | Organizational aspects of caring                                                   | The Milbank Quarterly                     | 73     | 1     | Journal article | Caring        | HCPs                                                 |
| Larson, 1993                     | Self-concealment: Implications for stress and empathy in oncology care             | Journal of Psychosocial Oncology          | 11     | 4     | Journal article | Empathy       | Oncology staff                                       |
| Nadelson, 1993                   | Ethics, empathy, and gender in health care.                                        | American Journal of Psychotherapy         | 150    |       | Journal article | Empathy       | HCPs                                                 |
| Book, 1991                       | Is empathy cost efficient?                                                         | American Journal of Psychotherapy         | 45     | 1     | Journal article | Empathy       | Psychiatrists (+ by extension, doctors)              |
| Gallop, Lancee & Garfinkel, 1990 | The empathic process and its mediators. A heuristic model                          | The Journal of Nervous and Mental Disease | 178    | 10    | Journal article | Empathy       | HCPs (aimed at teachers, therapists and researchers) |
| Friedland , 1988                 | AIDS and compassion                                                                | JAMA                                      | 259    | 19    | Journal article | Compassion    | Society and HCPs in general                          |
| Wilmer, 1987                     | The doctor-patient relationship and the and issues of pity, sympathy, and empathy. | Empathy                                   |        |       |                 |               | Physicians                                           |
| Barber, 1976                     | Compassion in medicine: toward new definitions and new institutions.               | New England Journal of Medicine           | 295    |       | Journal article | Compassion    | HCPs                                                 |

## PREDICTORS OF PHYSICIAN COMPASSION: A SYSTEMATIC REVIEW

### eSupplement 6: Reviews

| authors                                 | year | title                                                                                                                                                                               | journal                                                          | volume | issue | PublicationType | Review Type        | MainConstruct                                      | Sample                            |
|-----------------------------------------|------|-------------------------------------------------------------------------------------------------------------------------------------------------------------------------------------|------------------------------------------------------------------|--------|-------|-----------------|--------------------|----------------------------------------------------|-----------------------------------|
| Maximiano-Barreto et al., 2020          | 2020 | Factors associated with levels of empathy among students and professionals in the health field: a systematic review.                                                                | Trends in Psychiatry and Psychotherapy                           | 42     | 2     | Journal article | Systematic review  | Empathy                                            | HCPs                              |
| Moudatsou et al., 2020                  | 2020 | The role of empathy in health and social care professionals                                                                                                                         | Healthcare                                                       | 8      | 1     | Journal article | Literature review  | Empathy                                            | HCPs                              |
| Kemp et al., 2020                       | 2020 | Delivery of compassionate mental health care in a digital technology-driven age: scoping review                                                                                     | Journal of Medical Internet Research                             | 22     | 3     | Journal article | Scoping review     | Compassionate care                                 | HCPs in general                   |
| Sinclair et al., 2020                   | 2020 | Compassion in pediatric healthcare: a scoping review                                                                                                                                | Journal of Pediatric Nursing-Nursing Care of Children & Families | 51     |       | Journal article | Scoping review     | Compassion                                         | Pediatric HCPs                    |
| Kondo, et al., 2019                     | 2019 | Clinical empathy in medical consultations in Japan.                                                                                                                                 | Papers in Language and Communication Studies                     | 2      | 3     | Journal article | Literature review  | Empathy                                            | Doctors                           |
| Das & Charlton, 2018                    | 2018 | Guarding against dispassion for doctors in the NHS                                                                                                                                  | Journal of the Royal Society of Medicine                         | 111    | 10    | Journal article | Literature review  | Compassion                                         | Aimed at doctors                  |
| Elayyan, Rankin, Janet & Chaarani, 2018 | 2018 | Factors affecting empathetic patient care behaviour among medical doctors and nurses: an integrative literature review                                                              | Eastern Mediterranean Health Journal                             | 24     | 3     | Journal article | Literature review  | Empathy                                            | HCPs (including nurses + doctors) |
| Nightingale et al., 2018                | 2018 | The impact of emotional intelligence in health care professionals on caring behaviour towards patients in clinical and long-term care settings: Findings from an integrative review | International Journal of Nursing Studies                         | 80     |       | Journal article | Integrative review | Caring behaviours (in terms of compassionate care) | Includes nurses + physicians      |
| Han & Pappas, 2018                      | 2018 | A review of empathy, its importance, and its teaching in surgical training                                                                                                          | Journal of Surgical Education                                    | 75     | 1     | Journal article | Literature review  | Empathy                                            | Surgery residents                 |



## PREDICTORS OF PHYSICIAN COMPASSION: A SYSTEMATIC REVIEW

| authors                           | year | title                                                                                                                       | journal                                           | volume | issue | PublicationType | Review Type        | MainConstruct | Sample                                                                                                                    |
|-----------------------------------|------|-----------------------------------------------------------------------------------------------------------------------------|---------------------------------------------------|--------|-------|-----------------|--------------------|---------------|---------------------------------------------------------------------------------------------------------------------------|
|                                   |      |                                                                                                                             |                                                   |        |       |                 |                    |               | /surgeons                                                                                                                 |
| Brito-Pons & Librada-Flores, 2018 | 2018 | Compassion in palliative care: a review                                                                                     | Current Opinion in Supportive and Palliative Care | 12     | 4     | Journal article | Literature review  | Compassion    | Targeted at all palliative care HCPs                                                                                      |
| Wilkinson et al., 2017            | 2017 | Examining the relationship between burnout and empathy in healthcare professionals: a systematic review                     | Burnout Research                                  | 6      |       | Journal article | Systematic review  | Empathy       | 10 studies involving nurses (n=4), nurses + mental health workers (n=1), doctors (n=3) and mixed doctors and nurses (n=2) |
| Sinclair et al., 2017             | 2017 | Can self-compassion promote healthcare provider well-being and compassionate care to others? Results of a systematic review | Applied Psychology. Health and well-being         | 9      | 2     | Journal article | Systematic review  | Compassion    | HCPs                                                                                                                      |
| Mills, Wand & Fraser, 2017        | 2017 | Palliative care professionals' care and compassion for self and others: a narrative review.                                 | International Journal of Palliative Nursing       | 23     |       | Journal article | Narrative review   | Compassion    | HCPs (palliative)                                                                                                         |
| dle Zulueta, 2016                 | 2016 | Developing compassionate leadership in health care: an integrative review                                                   | Journal of Healthcare Leadership                  | 8      |       | Journal article | Integrative review | Compassion    | HCPs                                                                                                                      |

## PREDICTORS OF PHYSICIAN COMPASSION: A SYSTEMATIC REVIEW

| authors                           | year | title                                                                                                        | journal                                | volume | issue | PublicationType | Review Type       | MainConstruct     | Sample                                      |
|-----------------------------------|------|--------------------------------------------------------------------------------------------------------------|----------------------------------------|--------|-------|-----------------|-------------------|-------------------|---------------------------------------------|
| Sinclair et al., 2016             | 2016 | Compassion: a scoping review of the healthcare literature                                                    | BMC Palliative Care                    | 15     |       | Journal article | Scoping review    | Compassion        | HCPs                                        |
| Jackson, Euguene & Tremblay, 2015 | 2015 | Improving empathy in the care of pain patients                                                               | AJOB Neuroscience                      | 6      | 3     | Journal article | Literature review | Empathy           | Doctors, nurses + other HCPs                |
| Mannava et al., 2015              | 2015 | Attitudes and behaviours of maternal health care providers in interactions with clients: a systematic review | Globalization and Health               | 11     | 1     | Journal article | Systematic review | Caring behaviours | HCPs                                        |
| Lachal et al., 2015               | 2015 | Metasynthesis of youth suicidal behaviours: Perspectives of youth, parents, and health care professionals    | PLoS ONE                               | 10     | 5     | Journal article | Metasynthesis     | Empathy           | Physicians                                  |
| Raab, 2014                        | 2014 | Mindfulness, self-compassion, and empathy among health care professionals: a review of the literature        | Journal of Health Care Chaplaincy      | 20     | 3     | Journal article | Literature review | Empathy           | HCPs                                        |
| Borkar, 2014                      | 2014 | Empathy in physician-patient relationship: the construct and its applicability to India's health care        | Social Change                          | 44     | 3     | Journal article | Literature review | Empathy           | Physicians                                  |
| Crawford et al., 2014             | 2014 | The design of compassionate care                                                                             | Journal of Clinical Nursing            | 23     | 23    | Journal article | Literature review | Compassion        | Targeted at all HCPs                        |
| Jani, Blane, & Mercer, 2012       | 2012 | The role of empathy in therapy and the physician-patient relationship                                        | Forschende Komplementarme Dizin (2006) | 19     | 5     | Journal article | Literature review | Empathy           | HCPs (including doctors + psychotherapists) |
| Neumann et al., 2011              | 2011 | Empathy decline and its reasons: a systematic review of studies with medical students and residents          | Academic Medicine                      | 86     | 8     | Journal article | Systematic review | Empathy           | Targeted at medical students and residents  |

## PREDICTORS OF PHYSICIAN COMPASSION: A SYSTEMATIC REVIEW

| authors               | year | title                                                                                                               | journal                                                    | volume | issue | PublicationType | Review Type        | MainConstruct                                               | Sample                                                   |
|-----------------------|------|---------------------------------------------------------------------------------------------------------------------|------------------------------------------------------------|--------|-------|-----------------|--------------------|-------------------------------------------------------------|----------------------------------------------------------|
| Colliver et al., 2010 | 2010 | Reports of the decline of empathy during medical education are greatly exaggerated: a reexamination of the research | Academic Medicine                                          | 85     | 4     | Journal article | Literature review  | Empathy                                                     | Students /Residents                                      |
| Pedersen, 2009        | 2009 | Empirical research on empathy in medicine-A critical review                                                         | Patient Education and Counseling                           | 76     | 3     | Journal article | Critical review    | Empathy                                                     | Clinicians                                               |
| Garden, 2009          | 2009 | Expanding clinical empathy: an activist perspective                                                                 | Journal of General Internal medicine                       | 24     | 1     | Journal article | Literature review  | Empathy (+ "alleviating suffering" = compassion)            | Physicians                                               |
| Sanghavi, 2006        | 2006 | What makes for a compassionate patient-caregiver relationship?                                                      | The Joint Commission Journal on Quality and Patient Safety | 32     | 5     | Journal article | Review/re-analysis | Compassion                                                  | HCPs                                                     |
| Pompili et al., 2005  | 2005 | Emergency staff reactions to suicidal and self-harming patients                                                     | European Journal of Emergency Medicine                     | 12     | 4     | Journal article | Literature review  | Responses/attitudes to people who self-harm/attempt suicide | Aimed at staff, mentions doctors and nurses specifically |
| May et al., 2004      | 2004 | Framing the doctor-patient relationship in chronic illness: a comparative study of general practitioners' accounts  | Sociology of health & illness                              | 26     | 2     | Journal article | Review/re-analysis | Empathy                                                     | GPs                                                      |
| Yunus, 2004           | 2004 | Suffering, science and sabotage                                                                                     | Journal of Musculoskeletal Pain                            | 12     | 2     | Journal article | Literature review  | Empathy                                                     | Physicians                                               |
| MacLeod, 2000         | 2000 | Learning to care: a medical perspective                                                                             | Palliative Medicine                                        | 14     | 3     | Journal article | Literature review  | Empathy                                                     | Palliative care                                          |

## PREDICTORS OF PHYSICIAN COMPASSION: A SYSTEMATIC REVIEW

### eSupplement 7: A detailed portrait of studies' methodology

| Author(s) and Year                                 | Publication type | Research aim                                                                                                                                                                                                                      | Methodology  | Qualitative research design               | Qualitative data type                                            | Quantitative research design                              | Quantitative data type      | Analysis method                                                     |
|----------------------------------------------------|------------------|-----------------------------------------------------------------------------------------------------------------------------------------------------------------------------------------------------------------------------------|--------------|-------------------------------------------|------------------------------------------------------------------|-----------------------------------------------------------|-----------------------------|---------------------------------------------------------------------|
| Ahrweiler et al., 2014 <sup>153</sup>              | Journal article  | to examine factors that promote and inhibit the development of empathy during medical education                                                                                                                                   | Qualitative  | Qualitative description/thematic analysis | Reflective writing/open-ended written questionnaires             | --                                                        | --                          | --                                                                  |
| Alcorta-Garza et al., 2016 <sup>94</sup>           | Journal article  | to confirm JSE psychometric properties in the cross-cultural context of Spain and Latin American countries, to measure the influence of social and cultural factors on the development of medical empathy in health practitioners | Quantitative | --                                        | --                                                               | Correlation/association study: Analytical cross-sectional | Self-report (questionnaire) | Frequencies/descriptives, Non-parametric tests, Regression, CFA/PCA |
| Anandarajah & Roseman, 2014 <sup>136</sup>         | Journal article  | to examine how physicians' spiritual beliefs related to their provision of compassionate care                                                                                                                                     | Qualitative  | Qualitative description/thematic analysis | Interviews, Reflective writing/open-ended written questionnaires | --                                                        | --                          | --                                                                  |
| Aomatsu et al., 2013 <sup>142</sup>                | Journal article  | to compare residents' vs medical students' concepts of empathy                                                                                                                                                                    | Qualitative  | Qualitative description/thematic analysis | Focus groups                                                     | --                                                        | --                          | --                                                                  |
| Avasarala, Whitehouse & Drake, 2015 <sup>122</sup> | Journal article  | to investigate factors affecting empathy in PGY1 doctors                                                                                                                                                                          | Quantitative | --                                        | --                                                               | Non-randomised exposure: Cohort study                     | Self-report (questionnaire) | Regression                                                          |

## PREDICTORS OF PHYSICIAN COMPASSION: A SYSTEMATIC REVIEW

|                                                      |                 |                                                                                                                                                                                                                  |               |                                           |                                                      |                                                           |                             |                                                |
|------------------------------------------------------|-----------------|------------------------------------------------------------------------------------------------------------------------------------------------------------------------------------------------------------------|---------------|-------------------------------------------|------------------------------------------------------|-----------------------------------------------------------|-----------------------------|------------------------------------------------|
| <b>Baker et al., 2018</b> <sup>151</sup>             | Journal article | to analyse the relationships between compassionate care and evidence-based practice discourse                                                                                                                    | Qualitative   | Discourse analysis                        | Interviews, Text/document analysis                   | --                                                        | --                          | --                                             |
| <b>Bateman et al., 2017</b> <sup>113</sup>           | Journal article | to explore the influence of physician gender and physician parental status on (1) physician-parent communication and (2) care of pediatric patients at the end of life (EOL).                                    | Qualitative   | Grounded theory                           | Interviews                                           | --                                                        | --                          | --                                             |
| <b>Batley et al., 2016</b> <sup>138</sup>            | Journal article | to investigate cynicism/empathy in medical students and doctors working in ED                                                                                                                                    | Qualitative   | Qualitative description/thematic analysis | Interviews                                           | --                                                        | --                          | --                                             |
| <b>Battegay et al., 1991</b> <sup>182</sup>          | Journal article | to explore how doctor patient relationships exploration affects physicians working with patients with AIDS                                                                                                       | Qualitative   | Case study                                | Case study                                           | --                                                        | --                          | --                                             |
| <b>Batton et al., 2011</b> <sup>133</sup>            | Journal article | to examine matters of privacy, parent emotional state, NICU communication, and quality of NICU care from the perspectives of physicians who are also the parents of an infant that required admission to an NICU | Mixed-methods | Qualitative description/thematic analysis | Reflective writing/open-ended written questionnaires | Correlation/association study: Analytical cross-sectional | Self-report (questionnaire) | Correlation analysis, T-tests                  |
| <b>Bayne et al., 2013</b> <sup>38</sup>              | Journal article | to develop a model for the conceptualisation of empathy during the medical consultation, using interview data from physicians                                                                                    | Qualitative   | Grounded theory                           | Interviews                                           | --                                                        | --                          | --                                             |
| <b>Bellini, Baime &amp; Shea, 2002</b> <sup>66</sup> | Journal article | to examine longitudinal changes in mood and empathy over the course of the internal medicine residency                                                                                                           | Quantitative  | --                                        | --                                                   | Non-randomised exposure: Cohort study                     | Self-report (questionnaire) | Frequencies/descriptives, Analyses of variance |
| <b>Bellini &amp; Shea, 2005</b> <sup>67</sup>        | Journal article | to investigate changes in empathy and mood over the course of internship year                                                                                                                                    | Quantitative  | --                                        | --                                                   | Non-randomised                                            | Self-report (questionnaire) | Frequencies/descriptives, T-                   |

## PREDICTORS OF PHYSICIAN COMPASSION: A SYSTEMATIC REVIEW

|                                                          |                 |                                                                                                                                         |               |                                                             |                                                      | exposure:<br>Cohort study                                    |                                                                                                               | tests,Analyses of<br>variance                                |
|----------------------------------------------------------|-----------------|-----------------------------------------------------------------------------------------------------------------------------------------|---------------|-------------------------------------------------------------|------------------------------------------------------|--------------------------------------------------------------|---------------------------------------------------------------------------------------------------------------|--------------------------------------------------------------|
| <b>Bertakis, 2011</b> <sup>101</sup>                     | Journal article | to investigate whether patient and physician gender, as well as gender concordance, may influence the provision of patient-centred care | Quantitative  | --                                                          | --                                                   | Non-randomised exposure:<br>Cohort study                     | Self-report (questionnaire), Assessed by coders (e.g. (video- or audiorecorded) interview assessed by coders) | Frequencies/descriptives, T-tests, Regression                |
| <b>Bertakis &amp; Azari, 2012</b> <sup>178</sup>         | Journal article | to characterize patient-centered care and identify associated variables                                                                 | Quantitative  | --                                                          | --                                                   | Correlation/association study:<br>Analytical cross-sectional | Self-report (questionnaire), Assessed by coders (e.g. (video- or audiorecorded) interview assessed by coders) | Frequencies/descriptives, Correlation analysis, Regression   |
| <b>Bessen et al., 2019</b> <sup>154</sup>                | Journal article | to qualitatively characterize methods utilized by physicians that facilitate the delivery of compassionate care at EOL                  | Qualitative   | Qualitative description/thematic analysis,<br>Phenomenology | Interviews                                           | --                                                           | --                                                                                                            | --                                                           |
| <b>Bishop et al., 2014</b> <sup>168</sup>                | Report          | to understand dynamics between efficiency and compassionate care                                                                        | Qualitative   | Qualitative description/thematic analysis                   | Focus groups                                         | --                                                           | --                                                                                                            | --                                                           |
| <b>Borracci et al., 2015</b> <sup>118</sup>              | Journal article | to investigate psychometrics of Spanish JSE among Argentinian doctors                                                                   | Quantitative  | --                                                          | --                                                   | Correlation/association study:<br>Analytical cross-sectional | Self-report (questionnaire)                                                                                   | Frequencies/descriptives, Non-parametric tests, CFA/PCA, KMO |
| <b>Brady, Bambury &amp; O'Reilly, 2015</b> <sup>78</sup> | Journal article | to understand empathy in effective doctor-patient relationship                                                                          | Mixed-methods | Qualitative description/thematic analysis                   | Reflective writing/open-ended written questionnaires | Correlation/association study:<br>Analytical cross-sectional | Self-report (questionnaire)                                                                                   | Frequencies/descriptives                                     |

## PREDICTORS OF PHYSICIAN COMPASSION: A SYSTEMATIC REVIEW

|                                                            |                 |                                                                                                                                            |              |                                 |                                                      |                                                                                |                                                                                  |                                                                                  |
|------------------------------------------------------------|-----------------|--------------------------------------------------------------------------------------------------------------------------------------------|--------------|---------------------------------|------------------------------------------------------|--------------------------------------------------------------------------------|----------------------------------------------------------------------------------|----------------------------------------------------------------------------------|
| <b>Branch et al., 2017</b> <sup>148</sup>                  | Journal article | to understand how physicians who completed an intensive faculty development program in medical humanism sustain their humanistic practices | Qualitative  | Case study (small group course) | Reflective writing/open-ended written questionnaires | --                                                                             | --                                                                               | --                                                                               |
| <b>Bratek et al., 2015</b> <sup>49</sup>                   | Journal article | to investigate empathy in medical students and professionals in Poland                                                                     | Quantitative | --                              | --                                                   | Correlation/association study: Analytical cross-sectional                      | Self-report (questionnaire)                                                      | Frequencies/descriptives, Correlation analysis, Chi square, Non-parametric tests |
| <b>Butalid, Bensing &amp; Verhaak, 2014</b> <sup>186</sup> | Journal article | to investigate changes in GPs' communication behaviours in psychosocial consultations over time                                            | Quantitative | --                              | --                                                   | Non-randomised exposure: (Interrupted) time-series, Analytical cross-sectional | Assessed by coders (e.g. (video- or audiorecorded) interview assessed by coders) | Frequencies/descriptives, Regression                                             |
| <b>Bylund &amp; Makoul, 2002</b> <sup>114</sup>            | Journal article | to develops a scale for measuring empathic communication, and compares results between genders                                             | Quantitative | --                              | --                                                   | Correlation/association study: Analytical cross-sectional                      | Assessed by coders (e.g. (video- or audiorecorded) interview assessed by coders) | Frequencies/descriptives, T-tests                                                |
| <b>Bylund &amp; Makoul, 2005</b> <sup>184</sup>            | Journal article | to investigate factors influencing empathic opportunity creation by patients, and empathic communication responses by physicians           | Quantitative | --                              | --                                                   | Correlation/association study: Analytical cross-sectional                      | Assessed by coders (e.g. (video- or audiorecorded) interview assessed by coders) | Frequencies/descriptives, Correlation analysis, T-tests                          |

## PREDICTORS OF PHYSICIAN COMPASSION: A SYSTEMATIC REVIEW

|                                                    |                 |                                                                                                                                                                                                 |              |                                           |            |                                                           |                                                                                                               |                                                                                            |
|----------------------------------------------------|-----------------|-------------------------------------------------------------------------------------------------------------------------------------------------------------------------------------------------|--------------|-------------------------------------------|------------|-----------------------------------------------------------|---------------------------------------------------------------------------------------------------------------|--------------------------------------------------------------------------------------------|
| <b>Carmel &amp; Glick, 1996</b> <sup>50</sup>      | Journal article | to understand personal characteristics that distinguish CEPs from other physicians, and organizational factors that might enhance or inhibit physicians' compassionate--empathic behavior (CEB) | Quantitative | --                                        | --         | Correlation/association study: Analytical cross-sectional | Self-report (questionnaire), Assessed by coders (e.g. (video- or audiorecorded) interview assessed by coders) | Frequencies/descriptives, Chi square, T-tests, Analyses of variance, Duncan multiple range |
| <b>Chaitoff et al., 2017</b> <sup>99</sup>         | Journal article | to identify correlates of physician empathy                                                                                                                                                     | Quantitative | --                                        | --         | Correlation/association study: Analytical cross-sectional | Self-report (questionnaire)                                                                                   | Frequencies/descriptives, Analyses of variance, Regression                                 |
| <b>Charles et al., 2018</b> <sup>51</sup>          | Journal article | to investigate empathy in GPs and factors affecting it                                                                                                                                          | Quantitative | --                                        | --         | Correlation/association study: Analytical cross-sectional | Self-report (questionnaire)                                                                                   | Frequencies/descriptives, Regression                                                       |
| <b>Chou, Kellom &amp; Shea, 2014</b> <sup>89</sup> | Journal article | to identify attitudes and habits that highly humanistic physicians perceive allow them to sustain their humanistic approach to patient care                                                     | Qualitative  | Qualitative description/thematic analysis | Interviews | --                                                        | --                                                                                                            | --                                                                                         |
| <b>Cicekci et al., 2017</b> <sup>95</sup>          | Journal article | to analyze the attitudes displayed by the relatives of patients and the physician with the purpose of determining the communication between the two parties                                     | Quantitative | --                                        | --         | Correlation/association study: Analytical cross-sectional | Self-report (questionnaire)                                                                                   | Frequencies/descriptives, Non-parametric tests                                             |
| <b>Clara et al., 2006</b> <sup>39</sup>            | Journal article | to investigate vascular surgeons' compassionate vs pragmatic responses in ethical situations, and what factors predict "compassionate" surgeons                                                 | Quantitative | --                                        | --         | Correlation/association study: Analytical cross-sectional | Self-report (questionnaire), Behavioural task                                                                 | Frequencies/descriptives, Chi square, T-tests, Regression, Cluster analyses                |



## PREDICTORS OF PHYSICIAN COMPASSION: A SYSTEMATIC REVIEW

|                                                     |                 |                                                                                                                                                                                                                  |              |                                                       |                       |                                                           |                             |                                                                               |
|-----------------------------------------------------|-----------------|------------------------------------------------------------------------------------------------------------------------------------------------------------------------------------------------------------------|--------------|-------------------------------------------------------|-----------------------|-----------------------------------------------------------|-----------------------------|-------------------------------------------------------------------------------|
| <b>Crowe &amp; Brugha, 2018</b> <sup>156</sup>      | Journal article | to explore expressions and management of emotion in doctors' narratives of work and training for insights into how socialisation continues after graduation                                                      | Qualitative  | Qualitative description/thematic analysis, Case study | Interviews            | --                                                        | --                          | --                                                                            |
| <b>Cyrus et al., 2017</b> <sup>83</sup>             | Journal article | to evaluate and investigate if gender, age, grade, marriage and specialized field affected empathy scores among trainees, interns and resident physicians                                                        | Quantitative | --                                                    | --                    | Correlation/association study: Analytical cross-sectional | Self-report (questionnaire) | Frequencies/descriptives, T-tests, Analyses of variance                       |
| <b>Davidson &amp; Fosgerau, 2014</b> <sup>100</sup> | Journal article | to investigate general practitioners' (GPs') and psychiatrists' responses to emotional disclosures in consultations with patients with depression.                                                               | Qualitative  | Discourse analysis                                    | Conversation analysis | --                                                        | --                          | --                                                                            |
| <b>Dehning et al., 2014</b> <sup>115</sup>          | Journal article | to analyse the differences bw surgeons and psychiatrists empathy                                                                                                                                                 | Quantitative | --                                                    | --                    | Correlation/association study: Analytical cross-sectional | Self-report (questionnaire) | Frequencies/descriptives, Correlation analysis, T-tests, Analyses of variance |
| <b>Derksen et al., 2015</b> <sup>87</sup>           | Journal article | to explore GP's experiences and the application of empathy in daily practice and to investigate the practical use of empathy. Facts such as preconditions, barriers and facilitating possibilities are described | Qualitative  | Iterative content analysis                            | Interviews            | --                                                        | --                          | --                                                                            |
| <b>Derksen et al., 2016</b> <sup>149</sup>          | Journal article | to investigate barriers to empathy amongst GPs and how they manage them                                                                                                                                          | Qualitative  | Iterative content analysis                            | Interviews            | --                                                        | --                          | --                                                                            |

## PREDICTORS OF PHYSICIAN COMPASSION: A SYSTEMATIC REVIEW

|                                                             |                 |                                                                                                                                                 |               |                                                        |                                     |                                                           |                                                                                  |                                                                                                       |
|-------------------------------------------------------------|-----------------|-------------------------------------------------------------------------------------------------------------------------------------------------|---------------|--------------------------------------------------------|-------------------------------------|-----------------------------------------------------------|----------------------------------------------------------------------------------|-------------------------------------------------------------------------------------------------------|
| <b>Derksen et al., 2018</b> <sup>146</sup>                  | Journal article | to explore why receiving and offering empathy during the encounter in general practice does not always meet the wishes of both patients and GPs | Qualitative   | Qualitative description/thematic analysis              | Interviews                          | --                                                        | --                                                                               | --                                                                                                    |
| <b>Dhawan, Steinbach &amp; Halpern, 2007</b> <sup>109</sup> | Journal article | to investigate differences in empathy between physicians working in correctional vs non-correctional settings                                   | Quantitative  | --                                                     | --                                  | Correlation/association study: Analytical cross-sectional | Self-report (questionnaire)                                                      | Frequencies/descriptives, Correlation analysis, Chi square                                            |
| <b>Di Lillo et al., 2009</b> <sup>79</sup>                  | Journal article | to investigate psychometrics of JSE in Italian physicians and factors affecting empathy                                                         | Quantitative  | --                                                     | --                                  | Correlation/association study: Analytical cross-sectional | Self-report (questionnaire)                                                      | Frequencies/descriptives, Correlation analysis, T-tests, Analyses of variance, CFA/PCA                |
| <b>Epstein &amp; Borrelli, 2001</b> <sup>125</sup>          | Journal article | to show how cultural values affect empathy                                                                                                      | Qualitative   | Qualitative description/thematic analysis, Ethnography | Interviews, Participant observation | --                                                        | --                                                                               | --                                                                                                    |
| <b>Epstein et al., 2007</b> <sup>185</sup>                  | Journal article | to investigate how doctors' responded to patients' empathic opportunities                                                                       | Mixed-methods | Qualitative description/thematic analysis              | Participant observation             | Correlation/association study: Analytical cross-sectional | Assessed by coders (e.g. (video- or audiorecorded) interview assessed by coders) | Frequencies/descriptives, Correlation analysis, Regression, Sequence analyses                         |
| <b>Ferreira, Afons &amp; Ramos, 2020</b> <sup>84</sup>      | Journal article | to investigate burnout and empathy in physicians and their relationship to each other and stage of training                                     | Quantitative  | --                                                     | --                                  | Correlation/association study: Analytical cross-sectional | Self-report (questionnaire)                                                      | Frequencies/descriptives, Correlation analysis, Chi square, T-tests, Non-parametric tests, Regression |
| <b>Foo et al., 2017</b> <sup>112</sup>                      | Journal article | to investigate the role of racial differences in patient-physician communication around mental health versus biomedical issues                  | Quantitative  | --                                                     | --                                  | Correlation/association study: Analytical cross-sectional | Assessed by coders (e.g. (video- or audiorecorded))                              | Frequencies/descriptives, Correlation analysis, Regression                                            |

## PREDICTORS OF PHYSICIAN COMPASSION: A SYSTEMATIC REVIEW

|                                                                       |                 |                                                                                                                                   |              |                                           |                                                                  |                                                           |                               |                                                                               |
|-----------------------------------------------------------------------|-----------------|-----------------------------------------------------------------------------------------------------------------------------------|--------------|-------------------------------------------|------------------------------------------------------------------|-----------------------------------------------------------|-------------------------------|-------------------------------------------------------------------------------|
|                                                                       |                 |                                                                                                                                   |              |                                           |                                                                  |                                                           | interview assessed by coders) |                                                                               |
| <b>Foreback et al., 2018</b> <sup>62</sup>                            | Journal article | to examine the self-reported empathy levels of internal medicine (IM) residents in 3 community-based teaching hospitals.          | Quantitative | --                                        | --                                                               | Correlation/association study: Analytical cross-sectional | Self-report (questionnaire)   | Frequencies/descriptives, Analyses of variance                                |
| <b>Fox et al., 2009</b> <sup>128</sup>                                | Journal article | to investigate how GPs' personal experience of illness impacted their practice                                                    | Qualitative  | Phenomenology (IPA)                       | Interviews                                                       | --                                                        | --                            | --                                                                            |
| <b>Fulop et al., 2011</b> <sup>140</sup>                              | Journal article | to study the causal factors of empathy and burnout and the effect of emotional involvement on medical doctors                     | Quantitative | --                                        | --                                                               | Correlation/association study: Analytical cross-sectional | Self-report (questionnaire)   | Frequencies/descriptives, Correlation analysis, Non-parametric tests, CFA/PCA |
| <b>Gateshill, Kucharska-Pietura &amp; Wattis, 2011</b> <sup>110</sup> | Journal article | to investigate mental healthcare HCPs' and non-mental-healthcare HCPs' attitudes towards people with mental disorders and empathy | Quantitative | --                                        | --                                                               | Correlation/association study: Analytical cross-sectional | Self-report (questionnaire)   | Frequencies/descriptives, Chi square, Non-parametric tests                    |
| <b>Gilligan et al., 2019</b> <sup>160</sup>                           | Journal article | to investigate insitutional healthcare leaders' opinions on facilitators and barriers to high quality humanistic care             | Qualitative  | Qualitative description/thematic analysis | Interviews, Reflective writing/open-ended written questionnaires | --                                                        | --                            | --                                                                            |
| <b>Gleichgerrcht &amp; Decety, 2013</b> <sup>52</sup>                 | Journal article | to investigate the factors affecting ProQoL and empathy in physicians                                                             | Quantitative | --                                        | --                                                               | Correlation/association study: Analytical cross-sectional | Self-report (questionnaire)   | Frequencies/descriptives, Correlation analysis, T-tests, Analyses of variance |
| <b>Gottenborg et al., 2018</b> <sup>139</sup>                         | Journal article | to investigate female physicians' experiences of pregnancy, parental leave and return to work                                     | Qualitative  | Qualitative description/thematic analysis | Interviews                                                       | --                                                        | --                            | --                                                                            |

## PREDICTORS OF PHYSICIAN COMPASSION: A SYSTEMATIC REVIEW

|                                                    |                 |                                                                                                                                                                 |              |                                           |              |                                                              |                                                                                  |                                                                                                        |
|----------------------------------------------------|-----------------|-----------------------------------------------------------------------------------------------------------------------------------------------------------------|--------------|-------------------------------------------|--------------|--------------------------------------------------------------|----------------------------------------------------------------------------------|--------------------------------------------------------------------------------------------------------|
| <b>Greenberg et al., 2015<sup>70</sup></b>         | Journal article | to investigate empathy, sense of power and personality traits in paediatric residents                                                                           | Quantitative | --                                        | --           | Non-randomised exposure:<br>Cohort study                     | Self-report (questionnaire)                                                      | Frequencies/descriptives, T-tests                                                                      |
| <b>Haider, Riaz &amp; Gill, 2020<sup>127</sup></b> | Journal article | to explore the reasons for decline in empathy among physicians to identify strategies for fostering empathetic clinical practice.                               | Qualitative  | Qualitative description/thematic analysis | Focus groups | --                                                           | --                                                                               | --                                                                                                     |
| <b>Handford et al., 2013<sup>40</sup></b>          | Journal article | to provide a more objective index of possible changes in empathy across the spectrum of clinical exposure                                                       | Quantitative | --                                        | --           | Correlation/association study:<br>Analytical cross-sectional | Self-report (questionnaire), Behavioural task, Heart Rate                        | Frequencies/descriptives, Correlation analysis, Chi square, Analyses of variance, Non-parametric tests |
| <b>Hayuni et al., 2019<sup>161</sup></b>           | Journal article | to examine the mediating role of the two components of secondary traumatic stress (STS) and burnout in the relation between empathy and grief among oncologists | Quantitative | --                                        | --           | Correlation/association study:<br>Analytical cross-sectional | Self-report (questionnaire)                                                      | Frequencies/descriptives, Correlation analysis, Regression                                             |
| <b>Hojat et al., 2002a<sup>96</sup></b>            | Journal article | to investigate construct validity of JSE, and compare scores by gender and specialty                                                                            | Quantitative | --                                        | --           | Correlation/association study:<br>Analytical cross-sectional | Self-report (questionnaire)                                                      | Frequencies/descriptives, T-tests, Analyses of variance, CFA/PCA                                       |
| <b>Hojat et al., 2002b<sup>92</sup></b>            | Journal article | to investigate gender and specialty differences in JSE scores                                                                                                   | Quantitative | --                                        | --           | Correlation/association study:<br>Analytical cross-sectional | Self-report (questionnaire)                                                      | Frequencies/descriptives, Correlation analysis, Analyses of variance                                   |
| <b>Hojat et al., 2005<sup>141</sup></b>            | Journal article | to investigate relationship between empathy scores of medical students who have become doctors to test the predictive validity of the JSE                       | Quantitative | --                                        | --           | Non-randomised exposure:<br>Cohort study                     | Assessed by coders (e.g. (video- or audiorecorded) interview assessed by coders) | Frequencies/descriptives, T-tests, the method of contrasted groups                                     |

## PREDICTORS OF PHYSICIAN COMPASSION: A SYSTEMATIC REVIEW

|                                                 |                 |                                                                                                                                                                                    |              |                                           |            |                                                              |                                                                                                    |                                                                                                       |
|-------------------------------------------------|-----------------|------------------------------------------------------------------------------------------------------------------------------------------------------------------------------------|--------------|-------------------------------------------|------------|--------------------------------------------------------------|----------------------------------------------------------------------------------------------------|-------------------------------------------------------------------------------------------------------|
| <b>Hong et al., 2011</b> <sup>63</sup>          | Journal article | to investigate the relationship between empathy and grades, marital status and personality in psychiatric residents                                                                | Quantitative | --                                        | --         | Correlation/association study: Analytical cross-sectional    | Self-report (questionnaire)                                                                        | Frequencies/descriptives, Correlation analysis, T-tests, Analyses of variance, Regression             |
| <b>Jaye &amp; Wilson, 2003</b> <sup>129</sup>   | Journal article | to provide a qualitative perspective on issues identified by GPs when they tell stories about their experiences of illness, including their interactions with attending physicians | Qualitative  | Qualitative description/thematic analysis | Interviews | --                                                           | --                                                                                                 | --                                                                                                    |
| <b>Jiao et al., 2014</b> <sup>53</sup>          | Journal article | to investigate attitudes towards suicide among psychiatrists, and factors which affect these                                                                                       | Quantitative | --                                        | --         | Correlation/association study: Analytical cross-sectional    | Self-report (questionnaire)                                                                        | Frequencies/descriptives, T-tests, Non-parametric tests                                               |
| <b>Jin et al., 2020</b> <sup>106</sup>          | Journal article | to explore the potential mediating effect of PsyCap on the relationship between distress and empathy                                                                               | Quantitative | --                                        | --         | Correlation/association study: Analytical cross-sectional    | Self-report (questionnaire)                                                                        | Frequencies/descriptives, Correlation analysis, T-tests, Analyses of variance, Pathway analysis (SEM) |
| <b>Jing, Jin &amp; Liu, 2019</b> <sup>85</sup>  | Journal article | to investigate how monetary incentives influence physicians' prosocial behaviour in online consultations                                                                           | Quantitative | --                                        | --         | Non-randomised exposure: Before-and-after study (controlled) | Behavioural task                                                                                   | Frequencies/descriptives, Correlation analysis, Regression                                            |
| <b>Johnson Shen et al., 2019</b> <sup>176</sup> | Journal article | to examine the empathic opportunities and responses within clinical consultations of lung cancer patients and how these each are associated with patient-reported outcomes         | Quantitative | --                                        | --         | Correlation/association study: Analytical cross-sectional    | Assessed by coders (e.g. (video- or audiorecorded) interview assessed by coders), Behavioural task | Frequencies/descriptives, Correlation analysis, Chi square                                            |

## PREDICTORS OF PHYSICIAN COMPASSION: A SYSTEMATIC REVIEW

|                                                 |                 |                                                                                                                                                                                                                               |              |    |    |                                                                   |                                                                                  |                                                                                 |
|-------------------------------------------------|-----------------|-------------------------------------------------------------------------------------------------------------------------------------------------------------------------------------------------------------------------------|--------------|----|----|-------------------------------------------------------------------|----------------------------------------------------------------------------------|---------------------------------------------------------------------------------|
| <b>Julia-Sanchis et al., 2019</b> <sup>41</sup> | Journal article | to determine the prevalence of burnout syndrome among Spanish emergency medical service professionals and establish any possible relationships between their levels of empathy and sociodemographic and/or working conditions | Quantitative | -- | -- | Correlation/association study: Analytical cross-sectional         | Self-report (questionnaire)                                                      | Frequencies/descriptives, Correlation analysis, T-tests, Analyses of variance   |
| <b>Kataoka et al., 2012</b> <sup>42</sup>       | Journal article | to investigate factors affecting empathy in female physicians                                                                                                                                                                 | Quantitative | -- | -- | Correlation/association study: Analytical cross-sectional         | Self-report (questionnaire)                                                      | Frequencies/descriptives, Correlation analysis, T-tests, Analyses of variance   |
| <b>Katsari et al., 2020</b> <sup>43</sup>       | Journal article | to investigate the Greek JSPPPE (i.e. patients' perceptions of physician empathy), and physician empathy in a sample of doctors                                                                                               | Quantitative | -- | -- | Correlation/association study: Analytical cross-sectional         | Self-report (questionnaire)                                                      | Frequencies/descriptives, Correlation analysis, Non-parametric tests, CFA/PCA   |
| <b>Kealy et al., 2016</b> <sup>162</sup>        | Journal article | to investigate residents' burnout, empathic functioning and coping strategies                                                                                                                                                 | Quantitative | -- | -- | Correlation/association study: Analytical cross-sectional         | Self-report (questionnaire)                                                      | Frequencies/descriptives, Chi square, Non-parametric tests                      |
| <b>Kemper et al., 2020</b> <sup>158</sup>       | Journal article | to describe the national epidemiology of burnout in pediatric residents                                                                                                                                                       | Quantitative | -- | -- | Non-randomised exposure: Cohort study, Analytical cross-sectional | Self-report (questionnaire)                                                      | Frequencies/descriptives, Chi square, T-tests, Analyses of variance, Regression |
| <b>Kennifer et al., 2009</b> <sup>175</sup>     | Journal article | to investigate how patient emotion influences doctors' empathic vs non-empathic responses                                                                                                                                     | Quantitative | -- | -- | Correlation/association study: Analytical cross-sectional         | Assessed by coders (e.g. (video- or audiorecorded) interview assessed by coders) | Frequencies/descriptives, Regression, Odds ratio                                |

## PREDICTORS OF PHYSICIAN COMPASSION: A SYSTEMATIC REVIEW

|                                                     |                 |                                                                                                                                                                                                                                                                                                                          |               |                                           |                                        |                                                           |                             |                                                                               |
|-----------------------------------------------------|-----------------|--------------------------------------------------------------------------------------------------------------------------------------------------------------------------------------------------------------------------------------------------------------------------------------------------------------------------|---------------|-------------------------------------------|----------------------------------------|-----------------------------------------------------------|-----------------------------|-------------------------------------------------------------------------------|
| <b>Kerasidou &amp; Kingori, 2019</b> <sup>171</sup> | Journal article | to understand the effects of austerity from the standpoint of the healthcare professionals                                                                                                                                                                                                                               | Qualitative   | Qualitative description/thematic analysis | Interviews                             | --                                                        | --                          | --                                                                            |
| <b>Kerasidou, 2019</b> <sup>169</sup>               | Journal article | to investigate the impact of austerity measures and culture of efficiency on HCPs' work experiences in A&E                                                                                                                                                                                                               | Qualitative   | Qualitative description/thematic analysis | Interviews                             | --                                                        | --                          | --                                                                            |
| <b>Khajavi &amp; Hekmat, 1971</b> <sup>71</sup>     | Journal article | to evaluate whether members of psychiatric team differ on empathy                                                                                                                                                                                                                                                        | Quantitative  | --                                        | --                                     | Correlation/association study: Analytical cross-sectional | Self-report (questionnaire) | Frequencies/descriptives, Correlation analysis, T-tests, Analyses of variance |
| <b>Kirmayer, 2008</b> <sup>126</sup>                | Journal article | to explore the limits of clinical empathy in situations of radical otherness                                                                                                                                                                                                                                             | Qualitative   | Case study                                | Case study presented at the conference | --                                                        | --                          | --                                                                            |
| <b>Kliszcz et al., 2006</b> <sup>116</sup>          | Journal article | to investigate scale validation of Polish version of JSE in mixed group of HCPs                                                                                                                                                                                                                                          | Quantitative  | --                                        | --                                     | Correlation/association study: Analytical cross-sectional | Self-report (questionnaire) | Frequencies/descriptives, Correlation analysis, Analyses of variance, CFA/PCA |
| <b>Kobayasi et al., 2018</b> <sup>119</sup>         | Journal article | to assess gender differences in the perception of quality of life with quantitative methods and to understand further, from the female residents' point of view, the reasons that may influence the perception of quality of life using qualitative method; resilience, empathy and daytime sleepiness were also scored. | Mixed-methods | Qualitative description/thematic analysis | Focus groups                           | Correlation/association study: Analytical cross-sectional | Self-report (questionnaire) | Frequencies/descriptives, Non-parametric tests                                |
| <b>Komisar &amp; McFarland, 2017</b> <sup>123</sup> | Journal article | to understand if the ability to find meaning in the clinical situations that residents face might be associated with empathy                                                                                                                                                                                             | Quantitative  | --                                        | --                                     | Correlation/association study: Analytical cross-sectional | Self-report (questionnaire) | Frequencies/descriptives, Chi square, T-tests                                 |

## PREDICTORS OF PHYSICIAN COMPASSION: A SYSTEMATIC REVIEW

|                                                   |                 |                                                                                                                                                                                                                                                                                                 |              |    |    |                                                           |                                                                                                    |                                                                                  |
|---------------------------------------------------|-----------------|-------------------------------------------------------------------------------------------------------------------------------------------------------------------------------------------------------------------------------------------------------------------------------------------------|--------------|----|----|-----------------------------------------------------------|----------------------------------------------------------------------------------------------------|----------------------------------------------------------------------------------|
| <b>Kondo et al., 2013</b> <sup>54</sup>           | Journal article | to clarify the relationship between personal characteristics and empathic behavior in Japanese oncologists                                                                                                                                                                                      | Quantitative | -- | -- | Correlation/association study: Analytical cross-sectional | Assessed by coders (e.g. (video- or audiorecorded) interview assessed by coders), Behavioural task | Frequencies/descriptives, Correlation analysis, Non-parametric tests, Regression |
| <b>Kozeny &amp; Tisanska, 2013</b> <sup>55</sup>  | Journal article | to examine the JSPE-HP psychometric parameters, underlying dimensionality via exploratory and confirmatory factor analysis<br>to examine the relation of empathy scores to age, gender, practice experience, and practice type using responses from a representative sample of Czech physicians | Quantitative | -- | -- | Correlation/association study: Analytical cross-sectional | Self-report (questionnaire)                                                                        | Frequencies/descriptives, Analyses of variance, CFA/PCA                          |
| <b>Krenek &amp; Zalewski, 1993</b> <sup>134</sup> | Journal article | to examine how familial psychopathology affects therapeutic relationships                                                                                                                                                                                                                       | Quantitative | -- | -- | Correlation/association study: Analytical cross-sectional | Self-report (questionnaire)                                                                        | Frequencies/descriptives, Analyses of variance, Regression                       |
| <b>Lases et al., 2019</b> <sup>172</sup>          | Journal article | to find associations of learning climate with residents' work-related well-being (incl. empathy)                                                                                                                                                                                                | Quantitative | -- | -- | Correlation/association study: Analytical cross-sectional | Self-report (questionnaire)                                                                        | Frequencies/descriptives, Regression                                             |
| <b>Lebowitz &amp; Ahn, 2014</b> <sup>189</sup>    | Journal article | to examine how biological explanations of patients' symptoms would affect mental health clinicians' empathy                                                                                                                                                                                     | Quantitative | -- | -- | Non-randomised exposure: Non-randomised trial             | Self-report (questionnaire), Behavioural task                                                      | Frequencies/descriptives, Analyses of variance                                   |
| <b>Lee et al., 2018</b> <sup>72</sup>             | Journal article | to evaluate empathy and burnout levels in residents in Singapore                                                                                                                                                                                                                                | Quantitative | -- | -- | Correlation/association study: Analytical cross-sectional | Self-report (questionnaire)                                                                        | Frequencies/descriptives, T-tests, Analyses of variance                          |



## PREDICTORS OF PHYSICIAN COMPASSION: A SYSTEMATIC REVIEW

|                                                         |                 |                                                                                                           |               |                                           |                                                      |                                                                |                                                                                                               |                                                                                           |
|---------------------------------------------------------|-----------------|-----------------------------------------------------------------------------------------------------------|---------------|-------------------------------------------|------------------------------------------------------|----------------------------------------------------------------|---------------------------------------------------------------------------------------------------------------|-------------------------------------------------------------------------------------------|
| <b>Lelorain et al., 2013</b> <sup>56</sup>              | Journal article | to examine physician practice characteristics that could explain clinical empathy beyond empathic concern | Quantitative  | --                                        | --                                                   | Correlation/association study: Analytical cross-sectional      | Self-report (questionnaire)                                                                                   | Frequencies/descriptives, Regression                                                      |
| <b>Lin, Hsu &amp; Chong, 2008</b> <sup>157</sup>        | Journal article | to investigate patients' and doctors' perceptions of doctor empathy                                       | Qualitative   | Phenomenology                             | Interviews                                           | --                                                             | --                                                                                                            | --                                                                                        |
| <b>Lown, Shin &amp; Jones, 2019</b> <sup>57</sup>       | Journal article | to understand empathy in effective doctor-patient relationship                                            | Quantitative  | --                                        | --                                                   | Correlation/association study: Analytical cross-sectional      | Self-report (questionnaire)                                                                                   | Frequencies/descriptives, Correlation analysis, Chi square, Analyses of variance          |
| <b>*Lyness, 1993</b> <sup>147</sup>                     | Dissertation    | to understand why physicians avoid being empathetic                                                       | Qualitative   | Qualitative description/thematic analysis | Interviews                                           | --                                                             | --                                                                                                            | --                                                                                        |
| <b>Mahoney, Sladek &amp; Neild, 2016</b> <sup>107</sup> | Journal article | to investigate doctors' and medical students' empathy and the factors affecting it                        | Mixed-methods | Qualitative description/thematic analysis | Reflective writing/open-ended written questionnaires | Correlation/association study: Analytical cross-sectional      | Self-report (questionnaire)                                                                                   | Frequencies/descriptives, T-tests, Analyses of variance                                   |
| <b>Mangione et al., 2002</b> <sup>73</sup>              | Journal article | to learn whether empathy could change at different levels of medical education                            | Quantitative  | --                                        | --                                                   | Correlation/association study: Analytical cross-sectional      | Self-report (questionnaire), Assessed by coders (e.g. (video- or audiorecorded) interview assessed by coders) | Frequencies/descriptives, Correlation analysis, Analyses of variance                      |
| <b>McFarland &amp; Roth, 2017</b> <sup>105</sup>        | Journal article | to analyse whether distress and empathy associate with resilience                                         | Quantitative  | --                                        | --                                                   | Non-randomised exposure: Before-and-after study (uncontrolled) | Self-report (questionnaire)                                                                                   | Frequencies/descriptives, Correlation analysis, Chi square, T-tests, Non-parametric tests |

## PREDICTORS OF PHYSICIAN COMPASSION: A SYSTEMATIC REVIEW

|                                                          |                 |                                                                                                               |              |                                           |                                     |                                                                |                                                                                  |                                                                                           |
|----------------------------------------------------------|-----------------|---------------------------------------------------------------------------------------------------------------|--------------|-------------------------------------------|-------------------------------------|----------------------------------------------------------------|----------------------------------------------------------------------------------|-------------------------------------------------------------------------------------------|
| <b>McFarland, Malone &amp; Roth, 2017</b> <sup>104</sup> | Journal article | to explore physician trainee empathy, distress, death exposures, and their attributed meaning for the trainee | Quantitative | --                                        | --                                  | Non-randomised exposure: Before-and-after study (uncontrolled) | Self-report (questionnaire)                                                      | Frequencies/descriptives, Correlation analysis, Chi square, T-tests, Non-parametric tests |
| <b>McManus et al., 2011</b> <sup>166</sup>               | Journal article | to investigate relationships between leisure activities, burnout and other variables (including empathy)      | Quantitative | --                                        | --                                  | Correlation/association study: Analytical cross-sectional      | Self-report (questionnaire)                                                      | Frequencies/descriptives, Correlation analysis, Regression                                |
| <b>Meeuwesen et al., 2006</b> <sup>174</sup>             | Journal article | to analyse whether Dutch GPs treat ethnical minority patients differently                                     | Quantitative | --                                        | --                                  | Correlation/association study: Analytical cross-sectional      | Assessed by coders (e.g. (video- or audiorecorded) interview assessed by coders) | Frequencies/descriptives, Regression                                                      |
| <b>Mills, Wand &amp; Fraser, 2018</b> <sup>155</sup>     | Journal article | to explore the meaning and practice of self-care as described by palliative care nurses and doctors           | Qualitative  | Qualitative description/thematic analysis | Interviews                          | --                                                             | --                                                                               | --                                                                                        |
| <b>Moralle et al., 2016</b> <sup>111</sup>               | Journal article | to investigate factors affecting empathy in residents                                                         | Quantitative | --                                        | --                                  | Correlation/association study: Analytical cross-sectional      | Self-report (questionnaire)                                                      | Frequencies/descriptives, Correlation analysis, T-tests                                   |
| <b>Moriarty et al., 2020</b> <sup>80</sup>               | Journal article | to investigate factors affecting GPs' attitudes towards young adults who self-harm                            | Quantitative | --                                        | --                                  | Correlation/association study: Analytical cross-sectional      | Self-report (questionnaire)                                                      | Frequencies/descriptives, T-tests, SEM                                                    |
| <b>Muggleton, Guy &amp; Howard, 2015</b> <sup>188</sup>  | Journal article | to investigate palliative HCPs' experiences of caring for patients with disgusting symptoms                   | Qualitative  | Phenomenology (IPA)                       | Interviews, Participant observation | --                                                             | --                                                                               | --                                                                                        |

## PREDICTORS OF PHYSICIAN COMPASSION: A SYSTEMATIC REVIEW

|                                                       |                 |                                                                                             |              |                                           |                                                                                                                                    |                                                           |                                                                                  |                                                                                           |
|-------------------------------------------------------|-----------------|---------------------------------------------------------------------------------------------|--------------|-------------------------------------------|------------------------------------------------------------------------------------------------------------------------------------|-----------------------------------------------------------|----------------------------------------------------------------------------------|-------------------------------------------------------------------------------------------|
| <b>Muslin &amp; Schlessinger, 1971</b> <sup>143</sup> | Journal article | to discuss a variety of reactions and interferences in empathic observations                | Qualitative  | Qualitative description/thematic analysis | Reflective writing/open-ended written questionnaires, Participant observation, Observation and reflection on videotaped interviews | --                                                        | --                                                                               | --                                                                                        |
| <b>Osim et al., 2019</b> <sup>86</sup>                | Journal article | to assess JSE in Nigeria                                                                    | Quantitative | --                                        | --                                                                                                                                 | Correlation/association study: Analytical cross-sectional | Self-report (questionnaire)                                                      | Frequencies/descriptives, Correlation analysis, Regression, CFA/PCA                       |
| <b>Paasche-Orlow &amp; Roter, 2003</b> <sup>103</sup> | Journal article | to compare communication behaviours between internal medicine vs family practice physicians | Quantitative | --                                        | --                                                                                                                                 | Correlation/association study: Analytical cross-sectional | Assessed by coders (e.g. (video- or audiorecorded) interview assessed by coders) | Frequencies/descriptives                                                                  |
| <b>Pardeshi et al., 2017</b> <sup>88</sup>            | Journal article | to investigate the attitudes or resident doctors towards patients with tuberculosis         | Quantitative | --                                        | --                                                                                                                                 | Correlation/association study: Analytical cross-sectional | Self-report (questionnaire)                                                      | Frequencies/descriptives, Chi square                                                      |
| <b>Park et al., 2016</b> <sup>64</sup>                | Journal article | to investigate residents' empathy and burnout and factors which affect these                | Quantitative | --                                        | --                                                                                                                                 | Correlation/association study: Analytical cross-sectional | Self-report (questionnaire)                                                      | Frequencies/descriptives, Correlation analysis, Chi square, T-tests, Analyses of variance |

## PREDICTORS OF PHYSICIAN COMPASSION: A SYSTEMATIC REVIEW

|                                                               |                 |                                                                                                                                                                                                                                           |              |                                                                                                          |                                |                                                           |                                                                                                                                 |                                                |
|---------------------------------------------------------------|-----------------|-------------------------------------------------------------------------------------------------------------------------------------------------------------------------------------------------------------------------------------------|--------------|----------------------------------------------------------------------------------------------------------|--------------------------------|-----------------------------------------------------------|---------------------------------------------------------------------------------------------------------------------------------|------------------------------------------------|
| <b>Park et al., 2018</b> <sup>181</sup>                       | Journal article | to explore the nature of emotional expressions found among patients new to HIV care, how HIV clinicians respond to these expressions, and predictors of clinician responses                                                               | Quantitative | --                                                                                                       | --                             | Correlation/association study: Analytical cross-sectional | Assessed by coders (e.g. (video- or audiorecorded) interview assessed by coders)                                                | Frequencies/descriptives, Regression           |
| <b>*Passalacqua, 2011</b> <sup>163</sup>                      | Dissertation    | to investigate how contextual demands, stress, and burnout impact empathy in residents throughout a long shift                                                                                                                            | Quantitative | --                                                                                                       | --                             | Non-randomised exposure: Cohort study                     | Self-report (questionnaire)                                                                                                     | Frequencies/descriptives, Chi square, T-tests  |
| <b>Paul-Savoie et al., 2018</b> <sup>44</sup>                 | Journal article | to investigate the influence of visible physical signs on caregiver's patient-centered and empathetic behaviours in chronic pain context                                                                                                  | Quantitative | --                                                                                                       | --                             | Non-randomised exposure: Case-control study               | Self-report (questionnaire), Assessed by coders (e.g. (video- or audiorecorded) interview assessed by coders), Behavioural task | Frequencies/descriptives, T-tests              |
| <b>Pawlikowski, Sak &amp; Marczewski, 2012</b> <sup>137</sup> | Journal article | to investigate physicians' religiosity and how this influences attitudes towards patients (including an empathy subscale)                                                                                                                 | Quantitative | --                                                                                                       | --                             | Correlation/association study: Analytical cross-sectional | Self-report (questionnaire)                                                                                                     | Frequencies/descriptives, Correlation analysis |
| <b>Peng, Clarkin &amp; Doja, 2018</b> <sup>145</sup>          | Journal article | to use online medical student discussion groups to provide insight into how cynicism in medicine is perceived, the consequences of cynicism on medical trainee development and potential links between the hidden curriculum and cynicism | Qualitative  | Qualitative description/thematic analysis, Narrative research (i.e. life experience), Discourse analysis | Content analysis (e.g. forums) | --                                                        | --                                                                                                                              | --                                             |

## PREDICTORS OF PHYSICIAN COMPASSION: A SYSTEMATIC REVIEW

|                                                    |                 |                                                                                                                                                                                           |              |                                           |            |                                                           |                                                                                  |                                                                                                    |
|----------------------------------------------------|-----------------|-------------------------------------------------------------------------------------------------------------------------------------------------------------------------------------------|--------------|-------------------------------------------|------------|-----------------------------------------------------------|----------------------------------------------------------------------------------|----------------------------------------------------------------------------------------------------|
| <b>Pensek &amp; Selic, 2018</b> <sup>130</sup>     | Journal article | to assess the burnout prevalence and level of empathic attitude in family medicine doctors (FMDs) and its associations with demographic factors, working conditions and physician health, | Quantitative | --                                        | --         | Correlation/association study: Analytical cross-sectional | Self-report (questionnaire)                                                      | Frequencies/descriptives, Correlation analysis, T-tests, Analyses of variance, Regression, CFA/PCA |
| <b>*Petrahai &amp; Nwangwu, 2003</b> <sup>74</sup> | Dissertation    | to investigate empathy in ED residents                                                                                                                                                    | Quantitative | --                                        | --         | Correlation/association study: Analytical cross-sectional | Self-report (questionnaire)                                                      | Frequencies/descriptives, Chi square                                                               |
| <b>Picard et al., 2016</b> <sup>93</sup>           | Journal article | to investigate doctors' perceptions of how burnout and empathy are related                                                                                                                | Qualitative  | Qualitative description/thematic analysis | Interviews | --                                                        | --                                                                               | --                                                                                                 |
| <b>Pinder, 1992</b> <sup>152</sup>                 | Journal article | to examine how GPs strike balance between detachment and empathy                                                                                                                          | Qualitative  | Qualitative description/thematic analysis | Interviews | --                                                        | --                                                                               | --                                                                                                 |
| <b>Pollak et al., 2007</b> <sup>58</sup>           | Journal article | to study whether oncologist traits were associated with empathic opportunities and empathic responses                                                                                     | Quantitative | --                                        | --         | Correlation/association study: Analytical cross-sectional | Assessed by coders (e.g. (video- or audiorecorded) interview assessed by coders) | Frequencies/descriptives, Chi square, T-tests                                                      |
| <b>Pollak et al., 2010</b> <sup>179</sup>          | Journal article | to investigate whether patient attributes predict oncologist empathic responses                                                                                                           | Quantitative | --                                        | --         | Correlation/association study: Analytical cross-sectional | Assessed by coders (e.g. (video- or audiorecorded) interview assessed by coders) | Frequencies/descriptives, Regression                                                               |
| <b>Polonsky et al., 2014</b> <sup>183</sup>        | Journal article | to understand how challenges affect empathy                                                                                                                                               | Quantitative | --                                        | --         | Correlation/association study: Analytical cross-sectional | Self-report (questionnaire)                                                      | Frequencies/descriptives, Correlation analysis, Regression, CFA/PCA                                |

## PREDICTORS OF PHYSICIAN COMPASSION: A SYSTEMATIC REVIEW

|                                                            |                 |                                                                                                                                                                       |               |                                           |                                                      |                                                                   |                                               |                                                                      |
|------------------------------------------------------------|-----------------|-----------------------------------------------------------------------------------------------------------------------------------------------------------------------|---------------|-------------------------------------------|------------------------------------------------------|-------------------------------------------------------------------|-----------------------------------------------|----------------------------------------------------------------------|
| <b>Porthe et al., 2018<sup>159</sup></b>                   | Journal article | to investigate HCPs and immigrant patients' perceptions of quality of care during Spanish economic crisis                                                             | Qualitative   | Qualitative description/thematic analysis | Interviews                                           | --                                                                | --                                            | --                                                                   |
| <b>*Psyhojos, 2017<sup>108</sup></b>                       | Dissertation    | to examine how the inclusion and analysis of patient-generated health data from internet of things may affect provider empathy and the physician-patient relationship | Quantitative  | --                                        | --                                                   | Correlation/association study: Analytical cross-sectional         | Self-report (questionnaire)                   | Frequencies/descriptives, Analyses of variance, Regression           |
| <b>Putrino et al., 2018<sup>59</sup></b>                   | Journal article | to investigate factors impacting empathy in psychologists, doctors, psychology students and medical students                                                          | Quantitative  | --                                        | --                                                   | Correlation/association study: Analytical cross-sectional         | Self-report (questionnaire), Behavioural task | Frequencies/descriptives, Correlation analysis, Analyses of variance |
| <b>Rawal, Strahlendorf &amp; Nimmon, 2020<sup>65</sup></b> | Journal article | to investigate trajectory of residents' empathy over time and factors affecting it                                                                                    | Qualitative   | Phenomenology                             | Interviews                                           | --                                                                | --                                            | --                                                                   |
| <b>Reed et al., 2018<sup>75</sup></b>                      | Journal article | to determine the short-term stability of factors associated with burnout (empathy)                                                                                    | Quantitative  | --                                        | --                                                   | Non-randomised exposure: Cohort study, Analytical cross-sectional | Self-report (questionnaire)                   | Frequencies/descriptives, Correlation analysis, Regression           |
| <b>Rider et al., 2018<sup>170</sup></b>                    | Journal article | to identify organizational factors that promote or inhibit humanistic practice of medicine by faculty physicians                                                      | Qualitative   | Qualitative description/thematic analysis | Reflective writing/open-ended written questionnaires | --                                                                | --                                            | --                                                                   |
| <b>Roberts et al., 2011<sup>45</sup></b>                   | Journal article | to investigate how doctors' personal experiences of illness influence their compassion/empathy                                                                        | Mixed-methods | Qualitative description/thematic analysis | Reflective writing/open-ended written questionnaires | Correlation/association study: Analytical cross-sectional         | Self-report (questionnaire)                   | Frequencies/descriptives, Analyses of variance                       |

## PREDICTORS OF PHYSICIAN COMPASSION: A SYSTEMATIC REVIEW

|                                                          |                 |                                                                                                                                                           |               |                                           |                                                      |                                                              |                             |                                                                                           |
|----------------------------------------------------------|-----------------|-----------------------------------------------------------------------------------------------------------------------------------------------------------|---------------|-------------------------------------------|------------------------------------------------------|--------------------------------------------------------------|-----------------------------|-------------------------------------------------------------------------------------------|
| <b>Rosen et al., 2006</b> <sup>68</sup>                  | Journal article | to explore the relationships between sleep deprivation and the evolution of mood disturbances, empathy, and burnout among a cohort of interns             | Quantitative  | --                                        | --                                                   | Non-randomised exposure:<br>Cohort study                     | Self-report (questionnaire) | Frequencies/descriptives, Chi square, T-tests                                             |
| <b>*Ross &amp; Indart, 2017</b> <sup>150</sup>           | Dissertation    | to investigate residents' empathy scores, impact of previous training, and to develop a new training curriculum to enhance doctor empathy                 | Mixed-methods | Qualitative description/thematic analysis | Reflective writing/open-ended written questionnaires | Correlation/association study:<br>Analytical cross-sectional | Self-report (questionnaire) | Frequencies/descriptives                                                                  |
| <b>Roth, Burgess &amp; Mahowald, 2007</b> <sup>187</sup> | Journal article | to assess and compare residents' beliefs and concerns about using opioids for treating pain in patients with cancer and noncancer low back pain (NLBP).   | Quantitative  | --                                        | --                                                   | Correlation/association study:<br>Analytical cross-sectional | Self-report (questionnaire) | Frequencies/descriptives, T-tests                                                         |
| <b>Roze des Ordon et al., 2020</b> <sup>167</sup>        | Journal article | to describe how individual and contextual challenges can impact compassion within critical care and palliative care settings                              | Qualitative   | Ethnography, Phenomenology                | Interviews, Focus groups, Participant observation    | --                                                           | --                          | --                                                                                        |
| <b>Rubinstein &amp; Bentwich, 2017</b> <sup>180</sup>    | Journal article | to investigate Israeli-Jewish doctors experiences of treating Syrian patients vs Palestinian/enemy combatant patients                                     | Qualitative   | Phenomenology                             | Interviews                                           | --                                                           | --                          | --                                                                                        |
| <b>Saguem et al., 2020</b> <sup>76</sup>                 | Journal article | to assess empathy dimensions in Tunisian psychiatry trainees and to evaluate their relationship with relevant professional and extra-professional factors | Quantitative  | --                                        | --                                                   | Correlation/association study:<br>Analytical cross-sectional | Self-report (questionnaire) | Frequencies/descriptives, Correlation analysis, T-tests, Analyses of variance, Regression |
| <b>Salyers et al., 2015</b> <sup>164</sup>               | Journal article | to identify ways that professional burnout may affect clinical work and consumer outcomes                                                                 | Mixed-methods | Qualitative description/thematic analysis | Reflective writing/open-ended written questionnaires | Correlation/association study:<br>Analytical cross-sectional | Self-report (questionnaire) | Frequencies/descriptives, Correlation analysis                                            |

PREDICTORS OF PHYSICIAN COMPASSION: A SYSTEMATIC REVIEW

|                                                         |                 |                                                                                                                                                                                                                                                                                |              |    |    |                                                           |                                                                                                               |                                                                              |
|---------------------------------------------------------|-----------------|--------------------------------------------------------------------------------------------------------------------------------------------------------------------------------------------------------------------------------------------------------------------------------|--------------|----|----|-----------------------------------------------------------|---------------------------------------------------------------------------------------------------------------|------------------------------------------------------------------------------|
| <b>Sandikci et al., 2017</b> <sup>102</sup>             | Journal article | to investigate physicians' definitions of "difficult patient" and attitudes/responses (including empathising) towards them                                                                                                                                                     | Quantitative | -- | -- | Correlation/association study: Analytical cross-sectional | Self-report (questionnaire)                                                                                   | Frequencies/descriptives, Chi square                                         |
| <b>Santamaria-Garcia et al., 2017</b> <sup>46</sup>     | Journal article | to (a) assess different dimensions of empathy for pain in mental health workers relative to general-physicians and non-medical workers; and (b) evaluate their relationship with relevant factors, such as moral profile, age, gender, years of experience, and workplace type | Quantitative | -- | -- | Non-randomised exposure: Non-randomised trial             | Self-report (questionnaire), Behavioural task                                                                 | Chi square, Analyses of variance, Regression                                 |
| <b>*Scott, 2011</b> <sup>144</sup>                      | Dissertation    | to investigate the factors affecting empathy                                                                                                                                                                                                                                   | Quantitative | -- | -- | Correlation/association study: Analytical cross-sectional | Self-report (questionnaire)                                                                                   | Correlation analysis, CFA/PCA                                                |
| <b>Shanafelt et al., 2005</b> <sup>77</sup>             | Journal article | to measure resident well-being and explored its relationship with empathy                                                                                                                                                                                                      | Quantitative | -- | -- | Correlation/association study: Analytical cross-sectional | Self-report (questionnaire)                                                                                   | Frequencies/descriptives, Wilcoxon Rank Sum Tests                            |
| <b>Shariat, Eshtad &amp; Ansari, 2010</b> <sup>47</sup> | Journal article | to investigate the psychometrics of the Persian JSE and factors affecting scores                                                                                                                                                                                               | Quantitative | -- | -- | Correlation/association study: Analytical cross-sectional | Self-report (questionnaire)                                                                                   | Frequencies/descriptives, Correlation analysis, T-tests, Regression, CFA/PCA |
| <b>Silvester et al., 2007</b> <sup>120</sup>            | Journal article | to assess if physician perceived control would affect empathy ratings via physician communication style                                                                                                                                                                        | Quantitative | -- | -- | Correlation/association study: Analytical cross-sectional | Self-report (questionnaire), Assessed by coders (e.g. (video- or audiorecorded) interview assessed by coders) | Frequencies/descriptives, Correlation analysis, SEM                          |



PREDICTORS OF PHYSICIAN COMPASSION: A SYSTEMATIC REVIEW

|                                                         |                 |                                                                                                                                                                                                                                                                                                                                                                                                                            |              |                                           |            |                                                           |                                                                                                               |                                                                      |
|---------------------------------------------------------|-----------------|----------------------------------------------------------------------------------------------------------------------------------------------------------------------------------------------------------------------------------------------------------------------------------------------------------------------------------------------------------------------------------------------------------------------------|--------------|-------------------------------------------|------------|-----------------------------------------------------------|---------------------------------------------------------------------------------------------------------------|----------------------------------------------------------------------|
| <b>Stanton et al., 2011</b> <sup>97</sup>               | Journal article | to investigate differences in emotional intelligence between psychiatrists and surgeons                                                                                                                                                                                                                                                                                                                                    | Quantitative | --                                        | --         | Correlation/association study: Analytical cross-sectional | Self-report (questionnaire)                                                                                   | Frequencies/descriptives, Correlation analysis, Non-parametric tests |
| <b>Stein, 1986</b> <sup>177</sup>                       | Journal article | to comment on how "real illness" vs "fake illness" are regarded by doctors in their personal explanatory models and how this may affect empathy                                                                                                                                                                                                                                                                            | Qualitative  | Case study                                | Case study | --                                                        | --                                                                                                            | --                                                                   |
| <b>Stratta, Riding &amp; Baker, 2016</b> <sup>98</sup>  | Journal article | to understand whether UK Foundation doctors perceived the phenomena of ethical erosion and empathy decline during their initial period of clinical practice, and if so, why this occurred                                                                                                                                                                                                                                  | Qualitative  | Qualitative description/thematic analysis | Interviews | --                                                        | --                                                                                                            | --                                                                   |
| <b>Street, Gordon &amp; Haidet, 2007</b> <sup>121</sup> | Journal article | to examine: (a) the relationships of physicians' patient-centered communication (informative, supportive, partnership-building) and affect (positive, contentious) on their perceptions of the patient, and (b) the degree to which communication and perceptions were affected by the physicians' characteristics, patients' demographic characteristics, physician-patient concordance, and the patient's communication. | Quantitative | --                                        | --         | Correlation/association study: Analytical cross-sectional | Self-report (questionnaire), Assessed by coders (e.g. (video- or audiorecorded) interview assessed by coders) | Frequencies/descriptives, Regression, CFA/PCA                        |
| <b>Suh et al., 2012</b> <sup>81</sup>                   | Journal article | to evaluate the psychometrics of a Korean version of the Jefferson Scale of Physician Empathy (JSPE) among Korean physicians                                                                                                                                                                                                                                                                                               | Quantitative | --                                        | --         | Correlation/association study: Analytical cross-sectional | Self-report (questionnaire)                                                                                   | Frequencies/descriptives, T-tests, Analyses of variance, CFA/PCA     |

## PREDICTORS OF PHYSICIAN COMPASSION: A SYSTEMATIC REVIEW

|                                                             |                 |                                                                                                                                                                                                      |              |                                           |            |                                                           |                                                                                  |                                                                     |
|-------------------------------------------------------------|-----------------|------------------------------------------------------------------------------------------------------------------------------------------------------------------------------------------------------|--------------|-------------------------------------------|------------|-----------------------------------------------------------|----------------------------------------------------------------------------------|---------------------------------------------------------------------|
| <b>Swendiman et al., 2019</b> <sup>90</sup>                 | Journal article | to identify attitudes, habits, and other factors that sustain humanism in academic surgical faculty, and compare these with attributes determined from a previous study of internal medicine faculty | Qualitative  | Qualitative description/thematic analysis | Interviews | --                                                        | --                                                                               | --                                                                  |
| <b>Uygun, Brown &amp; Herbert, 2019</b> <sup>131</sup>      | Journal article | to explore family physicians' capacity for and experiences of compassion in practice                                                                                                                 | Qualitative  | Phenomenology                             | Interviews | --                                                        | --                                                                               | --                                                                  |
| <b>van Hoorn et al., 2019</b> <sup>173</sup>                | Journal article | to investigate empathic opportunities and responses in a sample of patients visiting hand surgeons                                                                                                   | Quantitative | --                                        | --         | Non-randomised exposure: Case-control study               | Assessed by coders (e.g. (video- or audiorecorded) interview assessed by coders) | Frequencies/descriptives, Correlation analysis, T-tests             |
| <b>Walocha et al., 2013</b> <sup>165</sup>                  | Journal article | to determine whether a correlation existed between the level of empathy and burnout                                                                                                                  | Quantitative | --                                        | --         | Correlation/association study: Analytical cross-sectional | Self-report (questionnaire), Behavioural task                                    | Frequencies/descriptives, Correlation analysis, T-tests             |
| <b>Walocha, Tomaszewska &amp; Mizia, 2013</b> <sup>60</sup> | Journal article | to assess the levels of empathy among Polish physicians and surgeons                                                                                                                                 | Quantitative | --                                        | --         | Correlation/association study: Analytical cross-sectional | Self-report (questionnaire), Behavioural task                                    | Frequencies/descriptives, Correlation analysis, T-tests             |
| <b>Wasserman et al., 1983</b> <sup>117</sup>                | Journal article | to analyse how maternal concern affect empathy                                                                                                                                                       | Quantitative | --                                        | --         | Correlation/association study: Analytical cross-sectional | Assessed by coders (e.g. (video- or audiorecorded) interview assessed by coders) | Frequencies/descriptives, Correlation analysis, T-tests, Regression |

## PREDICTORS OF PHYSICIAN COMPASSION: A SYSTEMATIC REVIEW

|                                                              |                 |                                                                                                                                                                                                                                        |              |                                           |            |                                                           |                                                            |                                                                                           |
|--------------------------------------------------------------|-----------------|----------------------------------------------------------------------------------------------------------------------------------------------------------------------------------------------------------------------------------------|--------------|-------------------------------------------|------------|-----------------------------------------------------------|------------------------------------------------------------|-------------------------------------------------------------------------------------------|
| <b>West et al., 2006<sup>91</sup></b>                        | Journal article | to determine the association of self-perceived medical errors with resident quality of life, burnout, depression, and empathy                                                                                                          | Quantitative | --                                        | --         | Non-randomised exposure: Cohort study                     | Self-report (questionnaire)                                | Frequencies/descriptives, Regression, Wilcoxon-Mann-Whitney                               |
| <b>West et al., 2007<sup>69</sup></b>                        | Journal article | to explore residents' competency in medical knowledge and in empathy, one element of professionalism, and to evaluate the relationship between competencies in these domains.                                                          | Quantitative | --                                        | --         | Non-randomised exposure: Cohort study                     | Self-report (questionnaire), Academic knowledge assessment | Frequencies/descriptives, Correlation analysis, Wilcoxon signed rank test for paired data |
| <b>Wohlgemuth, Auerbach &amp; Parker, 2015<sup>135</sup></b> | Journal article | to examine the dual roles of geriatric clinicians who are caregivers                                                                                                                                                                   | Qualitative  | Qualitative description/thematic analysis | Interviews | --                                                        | --                                                         | --                                                                                        |
| <b>Wolfshohl et al., 2019<sup>48</sup></b>                   | Journal article | to determine the association between empathy and burnout among United States emergency medicine (EM) physicians                                                                                                                        | Quantitative | --                                        | --         | Correlation/association study: Analytical cross-sectional | Self-report (questionnaire)                                | Frequencies/descriptives, Correlation analysis, Chi square, Analyses of variance          |
| <b>Woolf et al., 2007<sup>132</sup></b>                      | Journal article | to investigate the relationship between doctors' and medical students' personal illness experiences, their examination results, preparedness for clinical practice, learning and professional attitudes and behaviour towards patients | Qualitative  | Qualitative description/thematic analysis | Interviews | --                                                        | --                                                         | --                                                                                        |
| <b>Yuguero et al., 2017<sup>124</sup></b>                    | Journal article | to investigate nurses' and doctors' empathy and burnout                                                                                                                                                                                | Quantitative | --                                        | --         | Correlation/association study: Analytical cross-sectional | Self-report (questionnaire)                                | Frequencies/descriptives, Correlation analysis, Chi square, Analyses of variance          |

## PREDICTORS OF PHYSICIAN COMPASSION: A SYSTEMATIC REVIEW

|                                           |                 |                                                                                                                                                                                                                                                                                                                                                               |              |    |    |                                                           |                                                                                                               |                                               |
|-------------------------------------------|-----------------|---------------------------------------------------------------------------------------------------------------------------------------------------------------------------------------------------------------------------------------------------------------------------------------------------------------------------------------------------------------|--------------|----|----|-----------------------------------------------------------|---------------------------------------------------------------------------------------------------------------|-----------------------------------------------|
| <b>Zandbelt et al., 2007<sup>61</sup></b> | Journal article | to examine variability in physicians' patient-centred behaviour in medical specialist encounters, and determine whether patient, visit, and physician characteristics influence this variability                                                                                                                                                              | Quantitative | -- | -- | Correlation/association study: Analytical cross-sectional | Self-report (questionnaire), Assessed by coders (e.g. (video- or audiorecorded) interview assessed by coders) | Frequencies/descriptives, Regression, CFA/PCA |
| <b>Zenasni et al., 2012<sup>82</sup></b>  | Journal article | (1) to develop a French version of the Jefferson Scale for Physician Empathy (JSPE) with appropriate psychometric properties; (2) to explore the relationships of clinical empathy with the sociodemographic characteristics of physicians, their training and aspects of their practice and (3) to examine associations between clinical empathy and burnout | Quantitative | -- | -- | Correlation/association study: Analytical cross-sectional | Self-report (questionnaire)                                                                                   | Frequencies/descriptives, Regression, CFA/PCA |

**eSupplement 8:** Construct measurement scales

| Construct measurement scale                                                                                                                                                        | Times used |
|------------------------------------------------------------------------------------------------------------------------------------------------------------------------------------|------------|
| JSPE or JSE                                                                                                                                                                        | 39         |
| IRI                                                                                                                                                                                | 26         |
| BEES                                                                                                                                                                               | 3          |
| Empathic Communication Coding System (ECCS)                                                                                                                                        | 3          |
| Roter's Interaction Analysis System (RIAS) coding                                                                                                                                  | 3          |
| Bar-On Emotional Quotient Inventory (Bar-On EQ-i)                                                                                                                                  | 2          |
| Epstein Emotional Empathy Scale                                                                                                                                                    | 2          |
| Modified Davis Observation Code                                                                                                                                                    | 2          |
| Reading the Mind in the Eyes test                                                                                                                                                  | 2          |
| Thematic Apperception Test (TAT) by Murray                                                                                                                                         | 2          |
| ABIM definition (ABIM, 1988)                                                                                                                                                       | 1          |
| CED - clinical ethical dilemmas                                                                                                                                                    | 1          |
| Continuers consisted of five behaviors that have been organized by educators under the mnemonic NURSE: Name, Understand, Respect, Support, and Explore                             | 1          |
| Empathic behavior in residency training by a postgraduate-rating form (Hojat, Veloski, & Borenstein, 1986)                                                                         | 1          |
| Empathy also anonymously reported by another physician                                                                                                                             | 1          |
| Empathy for pain task (EPT)                                                                                                                                                        | 1          |
| Fujimori M Akechi T Morita T Inagaki M Akizuki N Sakano Y et al. Preferences of cancer patients regarding the disclosure of bad news.                                              | 1          |
| Global affect scales of the Roter Interaction Analysis System                                                                                                                      | 1          |
| Hogan's empathy scale                                                                                                                                                              | 1          |
| Moral Judgement                                                                                                                                                                    | 1          |
| Multidimensional interaction analysis (MDIA) coding system                                                                                                                         | 1          |
| Other non-standardized: "Likert-scale items were used to assess residents' appraisals of empathic functioning"                                                                     | 1          |
| Other non-standardized: "a capacity and motivation to take in patient/colleague perspective and sense associated feelings—the ability to generate a safe/understanding atmosphere" | 1          |
| Other non-standardized: attitudes concerning compassion and empathy with patients in relation to their own and family members' personal health care                                | 1          |
| Other non-standardized: Developed own 28-item to assess residents perceptions of efficacy and safety of using opioids to treat pain in non-cancer and cancer patient samples       | 1          |
| Other non-standardized: Developed their own codebook to code empathic responses                                                                                                    | 1          |
| Other non-standardized: Developed their own survey measuring attitudes and behaviors of physicians in coping with difficult patients and their relatives.                          | 1          |

## PREDICTORS OF PHYSICIAN COMPASSION: A SYSTEMATIC REVIEW

| Construct measurement scale                                                                                                                                                                                              | Times used |
|--------------------------------------------------------------------------------------------------------------------------------------------------------------------------------------------------------------------------|------------|
| Other non-standardized: Did not state questionnaire just "questions related to feelings of empathy to psychiatric patients"                                                                                              | 1          |
| Other non-standardized: Feeling compassion/desire to help                                                                                                                                                                | 1          |
| Other non-standardized: Item "having an infant who required NICU admission has made me a more compassionate physician"                                                                                                   | 1          |
| Other non-standardized: Own coding structure                                                                                                                                                                             | 1          |
| Other non-standardized: Physicians' prosocial behaviors were the free consulting services offered by physicians in an online health care community, measured by the logged volume of free answers in a given month       | 1          |
| Other non-standardized: via adjectives, but used before and validated                                                                                                                                                    | 1          |
| Patient Practitioner Orientation Scale (F-PPOS)                                                                                                                                                                          | 1          |
| Patient-centred Behaviour Coding Instrument (Zandbelt et al. 2005)                                                                                                                                                       | 1          |
| Questionnaire based on the patient-physician communication questionnaire that was developed by Curtis et al. (2004) for chronic obstructive pulmonary disease patients in serious condition [validated in a pilot study] | 1          |
| Resource Exchange Analysis (REA)                                                                                                                                                                                         | 1          |
| Reynolds Empathy Scale (F-RES)                                                                                                                                                                                           | 1          |
| Scale of Attitude towards the Patient (SAtP)                                                                                                                                                                             | 1          |
| Schwartz Center Compassionate Care Scale (SCCCS)                                                                                                                                                                         | 1          |
| Self-harm knowledge, attitudes, and empathy                                                                                                                                                                              | 1          |
| Sherbrooke Observation Scale of patient-centered care (SOS-PCC)                                                                                                                                                          | 1          |
| State empathy (Tsang & Stanfords 2007)                                                                                                                                                                                   | 1          |
| Suchman's definitions of empathic opportunities and oncologists' responses to them                                                                                                                                       | 1          |
| The Scale of Public Attitudes about Suicide (SPAS) - empathy subscale (4)                                                                                                                                                | 1          |
| Toronto Empathy Questionnaire                                                                                                                                                                                            | 1          |
| Verona Coding Definitions of Emotional Sequences (VR-CoDES)                                                                                                                                                              | 1          |

### eSupplement 9: A detailed portrait of studies' participants and settings

| Country split                                  | Number of studies |
|------------------------------------------------|-------------------|
| United States                                  | 64                |
| United Kingdom (including England and Ireland) | 16                |
| Canada                                         | 7                 |
| The Netherlands                                | 7                 |
| Poland                                         | 5                 |
| Spain (including Catalan)                      | 5                 |
| China (including Taiwan)                       | 4                 |
| Australia                                      | 3                 |
| France                                         | 3                 |
| Israel                                         | 3                 |
| Japan                                          | 3                 |

PREDICTORS OF PHYSICIAN COMPASSION: A SYSTEMATIC REVIEW

| <b>Country split</b>             | <b>Number of studies</b> |
|----------------------------------|--------------------------|
| South Korea                      | 3                        |
| Argentina                        | 2                        |
| Denmark                          | 2                        |
| Germany                          | 2                        |
| Iran                             | 2                        |
| Latin American countries (mixed) | 2                        |
| Turkey                           | 2                        |
| Brazil                           | 1                        |
| Czech Republic                   | 1                        |
| Greece                           | 1                        |
| Hungary                          | 1                        |
| India                            | 1                        |
| Italy                            | 1                        |
| Lebanon                          | 1                        |
| Multi-country                    | 1                        |
| Multi-country (Spanish speaking) | 1                        |
| New Zealand                      | 1                        |
| Nigeria                          | 1                        |
| Pakistan                         | 1                        |
| Portugal                         | 1                        |
| Singapore                        | 1                        |
| Slovenia                         | 1                        |
| Switzerland                      | 1                        |
| Tunisia                          | 1                        |

PREDICTORS OF PHYSICIAN COMPASSION: A SYSTEMATIC REVIEW

**eSupplement 10:** A detailed portrait of studies' participants and settings

| Author(s) and Year                                 | Patient type       | Physician gender (%female) | Physician ethnicity(% White)                   | Physician experience (% >10 years) | Single Institution study? | Care settings (primary/2ndary/3tiary) | Private/public | Urban/rural | Contextual settings - other                    | Institution size |
|----------------------------------------------------|--------------------|----------------------------|------------------------------------------------|------------------------------------|---------------------------|---------------------------------------|----------------|-------------|------------------------------------------------|------------------|
| Ahrweiler et al., 2014 <sup>153</sup>              | General            | 24%                        | --                                             | 14.5 average                       | No                        | 2ndary/3tiary                         | --             | --          | Inpatient                                      | --               |
| Alcorta-Garza et al., 2016 <sup>94</sup>           | General            | 54%                        | Spanish-speaking - 50% Spain/50% Latin America | --                                 | No                        | --                                    | --             | --          | --                                             | --               |
| Anandarajah & Roseman, 2014 <sup>136</sup>         | General            | --                         | --                                             | 0%                                 | No                        | --                                    | --             | --          | --                                             | --               |
| Aomatsu et al., 2013 <sup>142</sup>                | General            | 38%                        | Japanese population                            | 0%                                 | Yes                       | Primary                               | --             | Urban       | --                                             | --               |
| Avasarala, Whitehouse & Drake, 2015 <sup>122</sup> | General            | 35%                        | --                                             | 0%                                 | Yes                       | Primary and secondary                 | Public         | Urban       | --                                             | --               |
| Baker et al., 2018 <sup>151</sup>                  | Chronic pain       | --                         | --                                             | --                                 | No                        | --                                    | --             | --          | Hospital pain centres and chronic pain clinics | --               |
| Bateman et al., 2017 <sup>113</sup>                | Children/infants   | 35%                        | 88%                                            | --                                 | Yes                       | 2ndary/3tiary                         | --             | --          | Paediatrics                                    | Medium           |
| Batley et al., 2016 <sup>138</sup>                 | General, Emergency | 40%                        | Lebanese population                            | --                                 | Yes                       | 3tiary                                | --             | --          | ED                                             | --               |
| Battegay et al., 1991 <sup>182</sup>               | HIV                | --                         | --                                             | --                                 | Yes                       | --                                    | --             | --          | AIDS outpatient clinic                         | --               |
| Batton et al., 2011 <sup>133</sup>                 | General            | --                         | 81%                                            | 19%                                | No                        | --                                    | --             | --          | --                                             | --               |
| Bayne et al., 2013 <sup>38</sup>                   | General            | 43%                        | 90%                                            | 76%                                | Yes                       | mixed                                 | --             | Mixed       | teaching hospital                              | --               |



PREDICTORS OF PHYSICIAN COMPASSION: A SYSTEMATIC REVIEW

| Author(s) and Year                                         | Patient type                     | Physician gender (%female) | Physician ethnicity(% White) | Physician experience (% >10 years) | Single Institution study? | Care settings (primary/2ndary/3tiary)                                                                                     | Private/public | Urban/rural | Contextual settings - other                 | Institution size |
|------------------------------------------------------------|----------------------------------|----------------------------|------------------------------|------------------------------------|---------------------------|---------------------------------------------------------------------------------------------------------------------------|----------------|-------------|---------------------------------------------|------------------|
| <b>Bellini, Baime &amp; Shea, 2002</b> <sup>66</sup>       | General                          | 40%                        | --                           | 0%                                 | Yes                       | Mixed (in intern program; 45 in the categorical program, 8 in the primary care program, and 8 in the preliminary program) | Private        | Urban       | --                                          | Large (776 beds) |
| <b>Bellini &amp; Shea, 2005</b> <sup>67</sup>              | General                          | 40%                        | --                           | 0%                                 | Yes                       | --                                                                                                                        | Private        | Urban       | --                                          | Large            |
| <b>Bertakis, 2011</b> <sup>101</sup>                       | General                          | 46%                        | --                           | --                                 | No                        | Primary/2ndary                                                                                                            | --             | --          | --                                          | --               |
| <b>Bertakis &amp; Azari, 2012</b> <sup>178</sup>           | General                          | 46%                        | --                           | --                                 | No                        | Primary/2ndary                                                                                                            | --             | --          | --                                          | --               |
| <b>Bessen et al., 2019</b> <sup>154</sup>                  | Oncology, Palliative/end-of-life | 46%                        | --                           | 54%                                | Yes                       | 2ndary                                                                                                                    | Private        | Rural       | Academic hospital                           | Medium           |
| <b>Bishop et al., 2014</b> <sup>168</sup>                  | ICU patients                     | --                         | --                           | 0%                                 | --                        | 3tiary                                                                                                                    | --             | --          | ICU                                         | --               |
| <b>Borracci et al., 2015</b> <sup>118</sup>                | Cardiac patients                 | 26%                        | Argentinian population       | --                                 | No                        | --                                                                                                                        | --             | --          | Cardiology                                  | --               |
| <b>Brady, Bambury &amp; O'Reilly, 2015</b> <sup>78</sup>   | General                          | 46%                        | --                           | --                                 | Yes                       | 2ndary/3tiary                                                                                                             | --             | --          | Teaching                                    | --               |
| <b>Branch et al., 2017</b> <sup>148</sup>                  | General                          | 59%                        | --                           | --                                 | No                        | --                                                                                                                        | --             | --          | medical schools, mostly teaching clinicians | --               |
| <b>Bratek et al., 2015</b> <sup>49</sup>                   | General                          | 77%                        | --                           | --                                 | Can't tell/unclear        | --                                                                                                                        | --             | --          | --                                          | --               |
| <b>Butalid, Bensing &amp; Verhaak, 2014</b> <sup>186</sup> | General                          | 26%                        | --                           | --                                 | No                        | Primary                                                                                                                   | --             | --          | --                                          | --               |

PREDICTORS OF PHYSICIAN COMPASSION: A SYSTEMATIC REVIEW

| Author(s) and Year                      | Patient type                      | Physician gender (%female) | Physician ethnicity(% White) | Physician experience (% >10 years)                    | Single Institution study? | Care settings (primary/2ndary/3tiary) | Private/public | Urban/rural | Contextual settings - other                | Institution size |
|-----------------------------------------|-----------------------------------|----------------------------|------------------------------|-------------------------------------------------------|---------------------------|---------------------------------------|----------------|-------------|--------------------------------------------|------------------|
| Bylund & Makoul, 2002 <sup>114</sup>    | General                           | 20%                        | --                           | --                                                    | No                        | Primary                               | --             | --          | --                                         | --               |
| Bylund & Makoul, 2005 <sup>184</sup>    | General                           | 20%                        | --                           | --                                                    | No                        | Primary                               | --             | --          | --                                         | --               |
| Carmel & Glick, 1996 <sup>50</sup>      | General                           | 18%                        | Israeli                      | Only average years after medical school report M=17.9 | Yes                       | --                                    | --             | Urban       | --                                         | Large            |
| Chaitoff et al., 2017 <sup>99</sup>     | General                           | 33%                        | 80.5%                        | 15 y on average                                       | Yes                       | --                                    | --             | --          | Survey taken prior to communication course | --               |
| Charles et al., 2018 <sup>51</sup>      | General                           | 47%                        | --                           | Average 19.08 years in practice                       | No                        | Primary                               | --             | Mixed       | --                                         | --               |
| Chou, Kellom & Shea, 2014 <sup>89</sup> | General                           | 56%                        | 81%                          | 10 mean years in practice                             | Yes                       | --                                    | --             | --          | Teaching                                   | --               |
| Cicekci et al., 2017 <sup>95</sup>      | ICU patients, Relatives/family    | 46%                        | Turkish population           | --                                                    | No                        | 3tiary                                | Mixed          | --          | ICU                                        | --               |
| Clara et al., 2006 <sup>39</sup>        | General, Vascular illness         | 26%                        | --                           | 53%                                                   | No                        | mixed                                 | Public         | Mixed       | --                                         | Mixed            |
| Crowe & Brugha, 2018 <sup>156</sup>     | General                           | 58%                        | --                           | 0%                                                    | No                        | --                                    | --             | --          | --                                         | --               |
| Cyrus et al., 2017 <sup>83</sup>        | General                           | 56%                        | Iranian population           | 0%                                                    | Yes                       | Primary                               | --             | --          | --                                         | --               |
| Daidsen & Fosgerau, 2014 <sup>100</sup> | Mental health/illness, depression | 48%                        | --                           | --                                                    | No                        | Primary/2ndary                        | Public         | --          | --                                         | --               |

PREDICTORS OF PHYSICIAN COMPASSION: A SYSTEMATIC REVIEW

| Author(s) and Year                               | Patient type                                              | Physician gender (%female)          | Physician ethnicity(% White) | Physician experience (% >10 years) | Single Institution study? | Care settings (primary/2ndary/3tiary)                                     | Private/public | Urban/rural | Contextual settings - other                                     | Institution size |
|--------------------------------------------------|-----------------------------------------------------------|-------------------------------------|------------------------------|------------------------------------|---------------------------|---------------------------------------------------------------------------|----------------|-------------|-----------------------------------------------------------------|------------------|
| Dehning et al., 2014 <sup>115</sup>              | General, Mental health/illness                            | 25% for surgeons; 50% psychiatrists | --                           | --                                 | Yes                       | --                                                                        | --             | --          | Department of Psychiatry & Psychotherapy; Department of Surgery | --               |
| Derksen et al., 2015 <sup>87</sup>               | General                                                   | 56%                                 | --                           | 16 years (mean experience)         | No                        | Primary                                                                   | Private        | Mixed       | solo/duo/group practice                                         | --               |
| Derksen et al., 2016 <sup>149</sup>              | General                                                   | 55%                                 | --                           | 16 years (mean experience)         | No                        | Primary                                                                   | Private        | Mixed       | solo/duo/group practice                                         | --               |
| Derksen et al., 2018 <sup>146</sup>              | General                                                   | 56%                                 | --                           | 16 years (mean experience)         | No                        | Primary                                                                   | Private        | Mixed       | solo, duo, group practice                                       | --               |
| Dhawan, Steinbach & Halpern, 2007 <sup>109</sup> | General, correctional facility patients                   | 18%                                 | ----                         | 69%                                | No                        | 54% correctional facilities; 46% non-correctional primary care physicians | --             | --          | --                                                              | --               |
| Di Lillo et al., 2009 <sup>79</sup>              | General                                                   | 26%                                 | --                           | 87%                                | No                        | 2ndary/3tiary                                                             | --             | --          | Teaching                                                        | Large            |
| Epstein & Borrelli, 2001 <sup>125</sup>          | General                                                   | --                                  | --                           | --                                 | No                        | Primary                                                                   | --             | --          | --                                                              | --               |
| Epstein et al., 2007 <sup>185</sup>              | Medically Unexplained Symptoms (worry, something serious) | 23%                                 | --                           | --                                 | No                        | Primary                                                                   | --             | Mixed       | 24% solo practitioners                                          | --               |

PREDICTORS OF PHYSICIAN COMPASSION: A SYSTEMATIC REVIEW

| Author(s) and Year                                         | Patient type          | Physician gender (%female) | Physician ethnicity(% White) | Physician experience (% >10 years) | Single Institution study? | Care settings (primary/2ndary/3tiary)                             | Private/public | Urban/rural | Contextual settings - other             | Institution size |
|------------------------------------------------------------|-----------------------|----------------------------|------------------------------|------------------------------------|---------------------------|-------------------------------------------------------------------|----------------|-------------|-----------------------------------------|------------------|
| Ferreira, Afons & Ramos, 2020 <sup>84</sup>                | General               | 48%                        | --                           | --                                 | No                        | 2 of 8 primary; 2 of 8 university hospitals; 4 district hospitals | --             | --          | --                                      | Medium and large |
| Foo et al., 2017 <sup>112</sup>                            | General               | 44%                        | 47%                          | --                                 | No                        | Primary                                                           | --             | --          | --                                      | --               |
| Foreback et al., 2018 <sup>62</sup>                        | General               | --                         | --                           | 0%                                 | No                        | --                                                                | --             | --          | --                                      | --               |
| Fox et al., 2009 <sup>128</sup>                            | General               | 41%                        | 94%                          | --                                 | No                        | Primary                                                           | Public         | --          | GPs who experienced significant illness | --               |
| Fulop et al., 2011 <sup>140</sup>                          | General               | 76%                        | --                           | 0%                                 | No                        | --                                                                | --             | --          | --                                      | --               |
| Gateshill, Kucharska-Pietura & Wattis, 2011 <sup>110</sup> | Mental health/illness | --                         | --                           | --                                 | No                        | Primary and secondary                                             | --             | --          | --                                      | --               |
| Gilligan et al., 2019 <sup>160</sup>                       | General               | 38%                        | --                           | --                                 | No                        | Primary                                                           | --             | --          | --                                      | --               |
| Gleichgerrcht & Decety, 2013 <sup>52</sup>                 | General               | 47%                        | Latin-American population    | Average of 11.9                    | No                        | --                                                                | --             | --          | www.intramed.net                        | --               |
| Gottenborg et al., 2018 <sup>139</sup>                     | General               | 100%                       | --                           | 30% (over 7 years)                 | No                        | --                                                                | --             | --          | --                                      | --               |
| Greenberg et al., 2015 <sup>70</sup>                       | Children/infants      | 82%                        | 88%                          | 0%                                 | Yes                       | --                                                                | --             | --          | teaching                                | --               |
| Haider, Riaz & Gill, 2020 <sup>127</sup>                   | General               | --                         | Pakistani population         | --                                 | Yes                       | --                                                                | --             | --          | --                                      | --               |
| Handford et al., 2013 <sup>40</sup>                        | General               | 45%                        | --                           | Mean duration of clinical          | Yes                       | --                                                                | --             | --          | --                                      | --               |

PREDICTORS OF PHYSICIAN COMPASSION: A SYSTEMATIC REVIEW

| Author(s) and Year                       | Patient type                         | Physician gender (%female) | Physician ethnicity(% White) | Physician experience (% >10 years) | Single Institution study? | Care settings (primary/2ndary/3tiary)  | Private/public | Urban/rural | Contextual settings - other             | Institution size |
|------------------------------------------|--------------------------------------|----------------------------|------------------------------|------------------------------------|---------------------------|----------------------------------------|----------------|-------------|-----------------------------------------|------------------|
|                                          |                                      |                            |                              | practice 22 years                  |                           |                                        |                |             |                                         |                  |
| Hayuni et al., 2019 <sup>161</sup>       | Oncology                             | 59%                        | Israeli population           | --                                 | No                        | Secondary                              | --             | --          | --                                      | --               |
| Hojat et al., 2002a <sup>96</sup>        | General                              | 25%                        | --                           | --                                 | Yes                       | Mixed                                  | --             | Urban       | --                                      | Large            |
| Hojat et al., 2002b <sup>92</sup>        | General                              | 26%                        | --                           | --                                 | Yes                       | Mixed                                  | --             | Urban       | --                                      |                  |
| Hojat et al., 2005 <sup>141</sup>        | General                              | 42%                        |                              | 0%                                 | No                        | --                                     | --             | --          | --                                      | --               |
| Hong et al., 2011 <sup>63</sup>          | Mental health/illness                | 42%                        | Korean population            | 0%                                 | No                        | --                                     | --             | --          | Psychiatric                             | --               |
| Jaye & Wilson, 2003 <sup>129</sup>       | General                              | 35%                        | --                           | 100%                               | No                        | Primary                                | --             | Mixed       |                                         |                  |
| Jiao et al., 2014 <sup>53</sup>          | Suicide ideation/self-harm           | 56%                        | Chinese population           | mean duration 14 years             | No                        | 2ndary/3tirary                         | --             | --          | Mental health hospitals/centred /rehubs | --               |
| Jin et al., 2020 <sup>106</sup>          | General                              | 60%                        | Chinese population           | 0%                                 | Yes                       | --                                     | --             | --          | --                                      | --               |
| Jing, Jin & Liu, 2019 <sup>85</sup>      | General                              | --                         | Chinese population           | --                                 | No                        | Not reported, mix from 3,851 hospitals | --             | --          | --                                      | --               |
| Johnson Shen et al., 2019 <sup>176</sup> | Lung cancer patients                 | --                         | --                           | --                                 | Yes                       | Secondary                              | --             | --          | Cancer centre                           | Large            |
| Julia-Sanchis et al., 2019 <sup>41</sup> | General, Children/infants, Emergency | 63%                        | --                           | 1-39 years (% not reported)        | No                        | --                                     | --             | --          | ED                                      | --               |
| Kataoka et al., 2012 <sup>42</sup>       | General                              | 100%                       | Japanese population          | --                                 | Yes                       | --                                     | --             | --          | teaching                                | --               |
| Katsari et al., 2020 <sup>43</sup>       | General                              | 53%                        | --                           | 6%                                 | Yes                       | --                                     | --             | --          | --                                      | --               |

PREDICTORS OF PHYSICIAN COMPASSION: A SYSTEMATIC REVIEW

| Author(s) and Year                       | Patient type              | Physician gender (%female) | Physician ethnicity(% White) | Physician experience (% >10 years) | Single Institution study? | Care settings (primary/2ndary/3tiary) | Private/public                  | Urban/rural            | Contextual settings - other                       | Institution size |
|------------------------------------------|---------------------------|----------------------------|------------------------------|------------------------------------|---------------------------|---------------------------------------|---------------------------------|------------------------|---------------------------------------------------|------------------|
| Kealy et al., 2016 <sup>162</sup>        | General                   | 64%                        | --                           | 0%                                 | No                        | --                                    | --                              | --                     | --                                                | --               |
| Kemper et al., 2020 <sup>158</sup>       | Children/infants          | 71-73%                     | 70-74%                       | 0%                                 | No                        | --                                    | --                              | --                     | residency programmes                              | --               |
| Kennifer et al., 2009 <sup>175</sup>     | Oncology                  | 18%                        | 81%                          | --                                 | No                        | Secondary                             | --                              | --                     | --                                                | --               |
| Kerasidou & Kingori, 2019 <sup>171</sup> | Emergency                 | --                         | --                           | --                                 | No                        | Primary                               | --                              | Mix of urban and rural | --                                                | Mix              |
| Kerasidou, 2019 <sup>169</sup>           | General, Emergency        | --                         | --                           | different seniority levels         | No                        | A&E (2ndary)                          | Public (NHS)                    | Urban and rural        | A&E (ED), two teaching and one regional hospitals | --               |
| Khajavi & Hekmat, 1971 <sup>71</sup>     | Mental health/illness     | --                         | --                           | --                                 | No                        | Primary                               | --                              | --                     | --                                                | --               |
| Kirmayer, 2008 <sup>126</sup>            | Mental health/illness     | 0%                         | --                           | 0%                                 | Yes                       | Secondary                             | --                              | --                     | --                                                | --               |
| Kliszcz et al., 2006 <sup>116</sup>      | General, Children/infants | 81%                        | --                           | 0%                                 | --                        | --                                    | --                              | --                     | --                                                | --               |
| Kobayasi et al., 2018 <sup>119</sup>     | General                   | 28%                        | Brazilian population - NR    | 0%                                 | Yes                       | 2ndary/3tiary                         | Public                          | Urban                  | Internal medicine rotations                       | Large            |
| Komisar & McFarland, 2017 <sup>123</sup> | Palliative/end-of-life    | 52%                        |                              | 0%                                 | Yes                       | Tertiary                              |                                 | Urban                  | End of Life Hematology/Oncology Ward              | Large            |
| Kondo et al., 2013 <sup>54</sup>         | Oncology                  | 17%                        | Japanese population - NR     | 50%                                | --                        | 2ndary/3tiary                         | --                              | --                     | Oncology                                          | --               |
| Kozeny & Tisanska, 2013 <sup>55</sup>    | General                   | 55%                        | --                           | --                                 | No                        | Mixed                                 | Mixed (47% private; 53% public) | Mixed                  | --                                                | Mixed            |

PREDICTORS OF PHYSICIAN COMPASSION: A SYSTEMATIC REVIEW

| Author(s) and Year                           | Patient type          | Physician gender (%female) | Physician ethnicity(% White) | Physician experience (% >10 years) | Single Institution study? | Care settings (primary/2ndary/3tiary) | Private/public | Urban/rural          | Contextual settings - other                                    | Institution size |
|----------------------------------------------|-----------------------|----------------------------|------------------------------|------------------------------------|---------------------------|---------------------------------------|----------------|----------------------|----------------------------------------------------------------|------------------|
| Krenek & Zalewski, 1993 <sup>134</sup>       | Mental health/illness | 15%                        | --                           | --                                 | No                        | --                                    | --             | --                   | --                                                             | --               |
| Lases et al., 2019 <sup>172</sup>            | General               | 45%                        | --                           | 0%                                 | No                        | --                                    | --             | --                   | academic & non-academic                                        | --               |
| Lebowitz & Ahn, 2014 <sup>189</sup>          | Mental health/illness | 56.8%, 71.4%, 68.9%        | 77.3%, 84.8%, 84%            | Median year of licensing 1999-2000 | No                        | --                                    | --             | --                   | mental health                                                  | --               |
| Lee et al., 2018 <sup>72</sup>               | General               | 55%                        | Chinese sample               | 0%                                 | No                        | Mixed                                 | --             | Mixed                | 3 general hospitals, 5 speciality centres, 9 community clinics | Mixed            |
| Lelorain et al., 2013 <sup>56</sup>          | General               | 49%                        | --                           | average reported 22.8 years        | No                        | Primary                               | --             | --                   | --                                                             | --               |
| Lin, Hsu & Chong, 2008 <sup>157</sup>        | Emergency             | 0%                         | Taiwanese population         | 9-17 years                         | No                        | 2ndary                                | --             | --                   | ED                                                             | Medium-large     |
| Lown, Shin & Jones, 2019 <sup>57</sup>       | General               | 19%                        | --                           | 32%                                | No                        | Primary and secondary                 | --             | --                   | --                                                             | Likely mixed     |
| *Lyness, 1993 <sup>147</sup>                 | Children/infants      | 68%                        | --                           | 0%                                 | Yes                       | Primary                               | --             | Urban                | Pediatrics                                                     | --               |
| Mahoney, Sladek & Neild, 2016 <sup>107</sup> | General               | --                         | --                           | > 8 years 94.4%, 98.7%             | No                        | Mixed                                 | 47.7% public   | Mostly urban (94.9%) | Majority teaching                                              | --               |
| Mangione et al., 2002 <sup>73</sup>          | General               | --                         | --                           | 0%                                 | Yes                       | --                                    | --             | --                   | --                                                             | --               |
| McFarland & Roth, 2017 <sup>105</sup>        | Oncology              | 52%                        | --                           | 0%                                 | Yes                       | 3tiary                                | Private        | Urban                | Teaching hospital, hematology/oncology ward                    | Large            |

PREDICTORS OF PHYSICIAN COMPASSION: A SYSTEMATIC REVIEW

| Author(s) and Year                                       | Patient type                                                  | Physician gender (%female) | Physician ethnicity(% White) | Physician experience (% >10 years) | Single Institution study? | Care settings (primary/2ndary/3tiary) | Private/public                      | Urban/rural | Contextual settings - other                 | Institution size |
|----------------------------------------------------------|---------------------------------------------------------------|----------------------------|------------------------------|------------------------------------|---------------------------|---------------------------------------|-------------------------------------|-------------|---------------------------------------------|------------------|
| <b>McFarland, Malone &amp; Roth, 2017</b> <sup>104</sup> | Oncology                                                      | 52%                        | --                           | 0%                                 | Yes                       | 3tiary                                | Private                             | Urban       | Teaching hospital, hematology/oncology ward | Large            |
| <b>McManus et al., 2011</b> <sup>166</sup>               | General                                                       |                            | --                           | --                                 | No                        | --                                    | --                                  | --          | --                                          | --               |
| <b>Meeuwesen et al., 2006</b> <sup>174</sup>             | General                                                       | 29%                        | --                           | --                                 | No                        | Primary                               | --                                  | Urban       | --                                          | --               |
| <b>Mills, Wand &amp; Fraser, 2018</b> <sup>155</sup>     | Palliative/end-of-life                                        | 63%                        | --                           | 83% (also includes the nurses)     | No                        | Mixed                                 | --                                  | Mixed       | Palliative                                  | Mixed            |
| <b>Moralle et al., 2016</b> <sup>111</sup>               | General                                                       | --                         | --                           | 0%                                 | Yes                       | --                                    | --                                  | Urban       | --                                          | --               |
| <b>Moriarty et al., 2020</b> <sup>80</sup>               | Suicide ideation/self-harm, Young adults (12 to 25 years old) | 54%                        | --                           | --                                 | No                        | --                                    | --                                  | --          | --                                          | --               |
| <b>Muggleton, Guy &amp; Howard, 2015</b> <sup>188</sup>  | Palliative/end-of-life, Disgusting symptoms                   | 100%                       | --                           | 100% (for physician)               | Yes                       | 3tiary                                | Public                              | --          | Palliative                                  | --               |
| <b>Muslin &amp; Schlessinger, 1971</b> <sup>143</sup>    | Mental health/illness                                         | --                         | --                           | 0%                                 | Yes                       | --                                    | --                                  | --          | --                                          | --               |
| <b>Osim et al., 2019</b> <sup>86</sup>                   | General                                                       | 42%                        | Nigerian population          | --                                 | Yes                       | Primary and Secondary                 | Public (assume by government-owned) | Urban       | --                                          | Large            |



PREDICTORS OF PHYSICIAN COMPASSION: A SYSTEMATIC REVIEW

| Author(s) and Year                                 | Patient type | Physician gender (%female) | Physician ethnicity(% White) | Physician experience (% >10 years)                   | Single Institution study? | Care settings (primary/2ndary/3tiary) | Private/public | Urban/rural          | Contextual settings - other                                        | Institution size |
|----------------------------------------------------|--------------|----------------------------|------------------------------|------------------------------------------------------|---------------------------|---------------------------------------|----------------|----------------------|--------------------------------------------------------------------|------------------|
| Paasche-Orlow & Roter, 2003 <sup>103</sup>         | General      | 10%                        | 85%                          | --                                                   | No                        | Primary                               | --             | Urban                | --                                                                 | --               |
| Pardeshi et al., 2017 <sup>88</sup>                | TB           | 45%                        | Indian population            | 0%                                                   | Yes                       | --                                    | --             | --                   | --                                                                 | --               |
| Park et al., 2016 <sup>64</sup>                    | General      | 33%                        | Korean population            | 0%                                                   | No                        | --                                    | --             | --                   | Teaching                                                           | --               |
| Park et al., 2018 <sup>181</sup>                   | HIV          | 79%                        | 68%                          | --                                                   | Yes                       | Secondary                             | --             | Urban                | --                                                                 | --               |
| *Passalacqua, 2011 <sup>163</sup>                  | General      | 32%                        | --                           | 0%                                                   | Yes                       | --                                    | --             | --                   | --                                                                 | --               |
| Paul-Savoie et al., 2018 <sup>44</sup>             | Chronic pain | 69%                        | --                           | average of 19.74 years of clinical experience (no %) | Can't tell/unclear        | Mixed                                 | --             | --                   | Chronic pain                                                       | --               |
| Pawlikowski, Sak & Marczewski, 2012 <sup>137</sup> | General      | 51%                        | --                           | --                                                   | No                        | --                                    | Public         | --                   | --                                                                 | --               |
| Peng, Clarkin & Doja, 2018 <sup>145</sup>          | General      | --                         | --                           | 0%                                                   | --                        | --                                    | --             | --                   | Premed101 (Canadian) and Student Doctor Network (American) forums. | --               |
| Pensek & Selic, 2018 <sup>130</sup>                | General      | 82%                        | --                           | 11.2 years average                                   | No                        | Primary                               | Public         | 63% urban; 37% rural | --                                                                 | --               |
| *Petrahai & Nwangwu, 2003 <sup>74</sup>            | General      | 23%                        | 87%                          | 0%                                                   | Yes                       | Primary                               | Public         | Urban                | --                                                                 | Large            |
| Picard et al., 2016 <sup>93</sup>                  | General      | 50%                        | --                           | 0%                                                   | No                        | 2ndary                                | --             | --                   | General Medicine                                                   | --               |

PREDICTORS OF PHYSICIAN COMPASSION: A SYSTEMATIC REVIEW

| Author(s) and Year                   | Patient type       | Physician gender (%female) | Physician ethnicity(% White) | Physician experience (% >10 years)        | Single Institution study? | Care settings (primary/2ndary/3tiary) | Private/public                                                                                 | Urban/rural | Contextual settings - other             | Institution size |
|--------------------------------------|--------------------|----------------------------|------------------------------|-------------------------------------------|---------------------------|---------------------------------------|------------------------------------------------------------------------------------------------|-------------|-----------------------------------------|------------------|
| Pinder, 1992 <sup>152</sup>          | Parkinsons Disease | --                         | --                           | --                                        | --                        | Primary                               | --                                                                                             | --          | --                                      | --               |
| Pollak et al., 2007 <sup>58</sup>    | Oncology           | 50%                        | 74%                          | Mean years since fellowship 14.7          | No                        | 3tiary                                | --                                                                                             | --          | Oncology                                | --               |
| Pollak et al., 2010 <sup>179</sup>   | Oncology           | 19%                        | 79%                          | mean years since fellowship 15.6          | No                        | 3tiary                                | --                                                                                             | --          | Oncology                                | --               |
| Polonsky et al., 2014 <sup>183</sup> | General            | 34%                        | NR - multicountry            | --                                        | No                        | Primary and secondary                 | --                                                                                             | --          | --                                      | --               |
| Porthe et al., 2018 <sup>159</sup>   | Immigrants         | 46%                        | Catalan population           | --                                        | No                        | Primary/2ndaty                        | --                                                                                             | Mixed       | --                                      | --               |
| *Psyhojos, 2017 <sup>108</sup>       | General            | 0%                         | --                           | 75% attending                             | No                        | --                                    | --                                                                                             | --          | The authors bought a database of emails | --               |
| Putrino et al., 2018 <sup>59</sup>   | General            | 62%                        | Argentinian - NR             | 24 out of 64 physicians and psychologists | No                        | --                                    | Mix (physicians from public hospitals and students either from a public or private university) | Urban       | --                                      | --               |

PREDICTORS OF PHYSICIAN COMPASSION: A SYSTEMATIC REVIEW

| Author(s) and Year                               | Patient type                                                                       | Physician gender (%female) | Physician ethnicity(% White) | Physician experience (% >10 years) | Single Institution study? | Care settings (primary/2ndary/3tiary) | Private/public | Urban/rural | Contextual settings - other          | Institution size |
|--------------------------------------------------|------------------------------------------------------------------------------------|----------------------------|------------------------------|------------------------------------|---------------------------|---------------------------------------|----------------|-------------|--------------------------------------|------------------|
| Rawal, Strahlendorf & Nimmon, 2020 <sup>65</sup> | Children/infants                                                                   | 70%                        | --                           | 0%                                 | Yes                       | --                                    | --             | Urban       | --                                   | Large            |
| Reed et al., 2018 <sup>75</sup>                  | Children/infants                                                                   | 63%                        | 78%                          | 0%                                 | Yes                       | 2ndary/3tiary                         | --             | --          | Children hospital                    | Large            |
| Rider et al., 2018 <sup>170</sup>                | General                                                                            | 59%                        | --                           | --                                 | No                        | Primary                               | --             | --          | --                                   | --               |
| Roberts et al., 2011 <sup>45</sup>               | General                                                                            | 45%                        | 69%                          | --                                 | Yes                       | Mixed                                 | --             | --          | Teaching hospital                    | --               |
| Rosen et al., 2006 <sup>68</sup>                 | General                                                                            | 51%                        | --                           | 0%                                 | Yes                       | --                                    | --             | --          | Teaching hospital                    | --               |
| *Ross & Indart, 2017 <sup>150</sup>              | General                                                                            | 61%                        | 46%                          | 0%                                 | Yes                       | Primary                               | --             | Urban       | --                                   | Large            |
| Roth, Burgess & Mahowald, 2007 <sup>187</sup>    | Chronic pain                                                                       | --                         | --                           | 0%                                 | Yes                       | Primary                               | --             | --          | --                                   | --               |
| Roze des Ordon et al., 2020 <sup>167</sup>       | Palliative/end-of-life, ICU                                                        | --                         | --                           | --                                 | --                        | --                                    | --             | --          | --                                   | --               |
| Rubinstein & Bentwich, 2017 <sup>180</sup>       | patient who are in direct (military) conflict with the host (Palestinians/Syrians) | 20%                        | Israeli - NR                 | 100%                               | No                        | 2ndary/3tiary                         | --             | --          | Military conflict                    | --               |
| Saguem et al., 2020 <sup>76</sup>                | Mental health/illness                                                              | Tunisian population        | 71%                          | --                                 | No                        | --                                    | --             | --          | In/outpatient, ED                    | --               |
| Salyers et al., 2015 <sup>164</sup>              | General, Veterans                                                                  | 69%                        | 77%                          | --                                 | Yes                       | --                                    | --             | --          | Veterans Affairs (VA) medical center | --               |

PREDICTORS OF PHYSICIAN COMPASSION: A SYSTEMATIC REVIEW

| Author(s) and Year                           | Patient type        | Physician gender (%female) | Physician ethnicity(% White) | Physician experience (% >10 years) | Single Institution study? | Care settings (primary/2ndary/3tiary) | Private/public     | Urban/rural | Contextual settings - other                                                      | Institution size |
|----------------------------------------------|---------------------|----------------------------|------------------------------|------------------------------------|---------------------------|---------------------------------------|--------------------|-------------|----------------------------------------------------------------------------------|------------------|
| Sandikci et al., 2017 <sup>102</sup>         | "Difficult patient" | 52%                        | Turkish population           | 25%                                | No                        | Mixed                                 | --                 | --          | --                                                                               | --               |
| Santamaria-Garcia et al., 2017 <sup>46</sup> | General, Pain       | 51%                        | Latin-American populations   | --                                 | No                        | Primary/2ndary                        | --                 | --          | Professionals who accessed Intramed (www.intramed.net)                           | --               |
| *Scott, 2011 <sup>144</sup>                  | General             | 59%                        | 33%                          | --                                 | No                        | Primary                               | --                 | --          | --                                                                               | --               |
| Shanafelt et al., 2005 <sup>77</sup>         | General             | 30%                        | --                           | 0%                                 | No                        | --                                    | --                 | --          | Teaching                                                                         | Large            |
| Shariat, Eshtad & Ansari, 2010 <sup>47</sup> | General             | 53%                        | Iranian population           | --                                 | No                        | Primary                               | --                 | --          | GPs approached during the Annual Meeting of the Iranian National Medical Council | --               |
| Silvester et al., 2007 <sup>120</sup>        | General             | 47%                        | 55%                          | 0%                                 | No                        | Primary                               | Public             | --          | NHS                                                                              | --               |
| Stanton et al., 2011 <sup>97</sup>           | General             | 30%                        | --                           | --                                 | No                        | --                                    | --                 | --          | --                                                                               | --               |
| Stein, 1986 <sup>177</sup>                   | Veterans            | --                         | --                           | --                                 | Yes                       | --                                    | --                 | --          | --                                                                               | --               |
| Stratta, Riding & Baker, 2016 <sup>98</sup>  | General             | 67%                        | --                           | 0% (foundation year)               | Yes                       | 2ndary/3tiary                         | Public             | Urban       | --                                                                               | Large            |
| Street, Gordon & Haidet, 2007 <sup>121</sup> | General             | 40%                        | 31%                          | --                                 | No                        | Primary                               | Public and private | Urban       | --                                                                               | --               |
| Suh et al., 2012 <sup>81</sup>               | General             | 45%                        | Korean population            | --                                 | Yes                       | 2ndary                                | --                 | --          | Teaching                                                                         | --               |
| Swendiman et al., 2019 <sup>90</sup>         | General             | 30%                        | 80%                          | 16 mean                            | Yes                       | --                                    | --                 | --          | Teaching                                                                         | --               |

PREDICTORS OF PHYSICIAN COMPASSION: A SYSTEMATIC REVIEW

| Author(s) and Year                                 | Patient type                               | Physician gender (%female) | Physician ethnicity(% White) | Physician experience (% >10 years) | Single Institution study? | Care settings (primary/2ndary/3tiary) | Private/public | Urban/rural | Contextual settings - other                                  | Institution size |
|----------------------------------------------------|--------------------------------------------|----------------------------|------------------------------|------------------------------------|---------------------------|---------------------------------------|----------------|-------------|--------------------------------------------------------------|------------------|
| Uygur, Brown & Herbert, 2019 <sup>131</sup>        | General, Palliative/end-of-life, Emergency | 59%                        | --                           | 41%                                | No                        | Mixed, mainly primary                 | --             | Both        | 3 academic (13.6%), 9 teaching (40.9%) = 54.5%               | --               |
| van Hoorn et al., 2019 <sup>173</sup>              | Hand surgery patients                      | --                         | --                           | --                                 | Yes                       | Secondary                             | --             | Urban       | --                                                           | --               |
| Walocha et al., 2013 <sup>165</sup>                | General                                    | 35%                        | --                           | --                                 | No                        | --                                    | --             | --          | Hospitals, outpatient clinics or university departments      | --               |
| Walocha, Tomaszewska & Mizia, 2013 <sup>60</sup>   | General                                    | 27%                        | --                           | --                                 | --                        | --                                    | --             | --          | Hospital wards, outpatient departments, didactic departments | --               |
| Wasserman et al., 1983 <sup>117</sup>              | Children/infants                           | 44%                        | --                           | 0%                                 | Yes                       | Primary                               | --             | Urban       | --                                                           | --               |
| West et al., 2006 <sup>91</sup>                    | General                                    | 36%                        | --                           | 0%                                 | Yes                       | --                                    | --             | --          | Internal Medicine                                            | --               |
| West et al., 2007 <sup>69</sup>                    | General                                    | 35%                        | --                           | 0%                                 | Yes                       | --                                    | --             | --          | Teaching                                                     | --               |
| Wohlgemuth, Auerbach & Parker, 2015 <sup>135</sup> | Elderly                                    | 81%                        | 100%                         | --                                 | Yes                       | 3tiary                                | --             | Urban       | Geriatric                                                    | --               |
| Wolfshohl et al., 2019 <sup>48</sup>               | General, Emergency                         | 29%                        | 78%                          | 23.5% > 5 years                    | Yes                       | --                                    | --             | --          | ED                                                           | --               |
| Woolf et al., 2007 <sup>132</sup>                  | General                                    | 50%                        | --                           | 38%                                | Yes                       | --                                    | --             | Urban       | Teaching hospital                                            | --               |
| Yuguero et al., 2017 <sup>124</sup>                | General                                    | 73%                        | Catalan population           | 48 median age                      | No                        | Primary                               | --             | Mixed       | --                                                           | --               |

PREDICTORS OF PHYSICIAN COMPASSION: A SYSTEMATIC REVIEW

| Author(s) and Year                  | Patient type | Physician gender (%female) | Physician ethnicity(% White) | Physician experience (% >10 years)          | Single Institution study? | Care settings (primary/2ndary/3tiary) | Private/public | Urban/rural | Contextual settings - other | Institution size |
|-------------------------------------|--------------|----------------------------|------------------------------|---------------------------------------------|---------------------------|---------------------------------------|----------------|-------------|-----------------------------|------------------|
| Zandbelt et al., 2007 <sup>61</sup> | General      | 47%                        | --                           | 8.6 years average (50% staff/50% residents) | Yes                       | 2ndary                                | --             | Urban       | --                          | Large            |
| Zenasni et al., 2012 <sup>82</sup>  | General      | 49%                        | --                           | Unknown - ages 27-75 y.o.                   | No                        | Primary                               | --             | Mixed       | GPs                         | --               |

# PREDICTORS OF PHYSICIAN COMPASSION: A SYSTEMATIC REVIEW

## eSupplement 11: Risk of Bias – Quantitative studies – ROBINS-I

### A) All studies

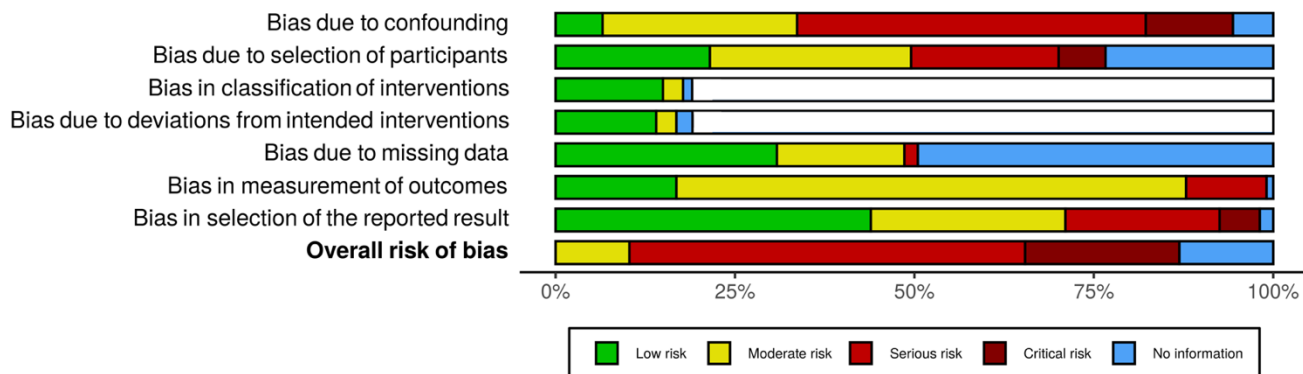

### B) Independent studies

|                                             | Risk of bias domains |    |    |    |    |    |    | Overall |
|---------------------------------------------|----------------------|----|----|----|----|----|----|---------|
|                                             | D1                   | D2 | D3 | D4 | D5 | D6 | D7 |         |
| Alcorta-Garza et al., 2016                  | ⊗                    | -  |    |    | -  | -  | +  | ⊗       |
| Avasarala, Whitehouse & Drake, 2015         | ⊗                    | ⊗  |    |    | +  | -  | +  | ⊗       |
| Batton et al., 2011                         | ⊕                    | -  |    |    | ?  | -  | +  | ⊕       |
| Bellini & Shea, 2005                        | ⊗                    | +  | +  | +  | ?  | -  | -  | ⊗       |
| Bellini, Baime & Shea, 2002                 | ⊗                    | +  | +  | +  | ?  | -  | +  | ⊗       |
| Bertakis & Azari, 2012                      | ⊗                    | +  | +  | +  | -  | +  | ⊗  | ⊗       |
| Bertakis, 2011                              | ⊗                    | +  | +  | +  | -  | +  | ⊗  | ⊗       |
| Borracci et al., 2015                       | ⊗                    | -  |    |    | ?  | -  | +  | ⊗       |
| Brady, Bambury & O'Reilly, 2015             | ⊕                    | ?  |    |    | ?  | -  | ⊕  | ⊕       |
| Bratek et al., 2015                         | ⊗                    | ?  |    |    | ?  | -  | ⊗  | ⊗       |
| Butalid, Bensing & Verhaak, 2014            | -                    | +  | +  | +  | -  | -  | -  | -       |
| Bylund & Makoul, 2002                       | ⊗                    | +  |    |    | +  | -  | -  | ⊗       |
| Bylund & Makoul, 2005                       | ⊗                    | ?  |    |    | +  | -  | ⊕  | ⊕       |
| Carmel & Glick, 1996                        | -                    | -  |    |    | ?  | ⊗  | -  | ⊗       |
| Chaitoff et al., 2017                       | -                    | ⊗  |    |    | ⊗  | -  | ⊗  | ⊗       |
| Charles et al., 2018                        | -                    | -  |    |    | +  | -  | +  | -       |
| Cicekci et al., 2017                        | ⊗                    | ?  |    |    | ?  | -  | +  | ⊗       |
| Clara et al., 2006                          | -                    | +  |    |    | -  | +  | +  | -       |
| Cyrus et al., 2017                          | ⊗                    | ⊕  |    |    | -  | -  | +  | ⊕       |
| Dehning et al., 2014                        | -                    | +  |    |    | +  | +  | +  | -       |
| Dhawan, Steinbach & Halpern, 2007           | ⊗                    | ⊕  |    |    | ?  | -  | -  | ⊕       |
| Di Lillo et al., 2009                       | -                    | ⊗  |    |    | +  | -  | +  | ⊗       |
| Epstein et al., 2007                        | ⊗                    | ⊗  |    |    | +  | ⊗  | +  | ⊗       |
| Ferreira, Afons & Ramos, 2020               | -                    | ?  |    |    | +  | -  | +  | ?       |
| Foo et al., 2017                            | ⊗                    | -  |    |    | ?  | +  | ?  | ⊗       |
| Foreback et al., 2018                       | ⊗                    | ⊗  |    |    | ?  | -  | ⊗  | ⊗       |
| Fulop et al., 2011                          | ⊕                    | ?  |    |    | ?  | -  | ⊗  | ⊕       |
| Gateshill, Kucharska-Pietura & Wattis, 2011 | ⊗                    | ?  |    |    | +  | -  | +  | ⊗       |

# PREDICTORS OF PHYSICIAN COMPASSION: A SYSTEMATIC REVIEW

|                                |   |   |   |   |   |   |   |   |
|--------------------------------|---|---|---|---|---|---|---|---|
| Gleichgerrcht & Decety, 2013   | - | ? |   |   | ? | - | + | ? |
| Greenberg et al., 2015         | ! | X | + | + | ? | - | + | ! |
| Handford et al., 2013          | + | ? |   |   | ? | + | + | ? |
| Hayuni et al., 2019            | X | - |   |   | - | - | + | X |
| Hojat et al., 2002a            | X | - |   |   | ? | - | - | X |
| Hojat et al., 2002b            | X | - |   |   | + | - | - | - |
| Hojat et al., 2005             | + | - | + | + | ? | X | - | X |
| Hong et al., 2011              | X | X |   |   | + | - | + | X |
| Jiao et al., 2014              | - | + |   |   | ? | - | + | ? |
| Jin et al., 2020               | X | + |   |   | + | - | - | X |
| Jing, Jin & Liu, 2019          | X | - | + | ? | + | + | - | X |
| Johnson Shen et al., 2019      | ! | - |   |   | ? | + | + | ! |
| Julia-Sanchis et al., 2019     | - | ? |   |   | + | - | + | ? |
| Kataoka et al., 2012           | X | X |   |   | ? | - | + | X |
| Katsari et al., 2020           | X | ? |   |   | ? | - | + | X |
| Kealy et al., 2016             | - | - |   |   | + | - | + | - |
| Kemper et al., 2020            | X | - | + | + | - | - | + | X |
| Kennifer et al., 2009          | X | - |   |   | + | X | X | X |
| Khajavi & Hekmat, 1971         | ? | ? |   |   | ? | - | - | ? |
| Kluszcz et al., 2006           | X | ? |   |   | ? | - | - | X |
| Kobayasi et al., 2018          | + | + |   |   | ? | - | + | ? |
| Komisar & McFarland , 2017     | - | - |   |   | ? | - | X | X |
| Kondo et al., 2013             | - | ? |   |   | + | + | + | ? |
| Kozeny & Tisanska, 2013        | - | + |   |   | ? | - | - | ? |
| Krenek & Zalewski, 1993        | X | ! |   |   | - | - | - | ! |
| Lases et al., 2019             | - | X |   |   | - | - | - | X |
| Lebowitz & Ahn, 2014           | X | ! | + | + | ? | - | + | ! |
| Lee et al., 2018               | + | X |   |   | ? | - | - | X |
| Lelorain et al., 2013          | ? | - |   |   | - | - | + | ? |
| Lown, Shin & Jones, 2019       | X | + |   |   | ? | - | X | X |
| Mahoney, Sladek & Neild, 2016  | X | ! |   |   | ? | - | X | ! |
| Mangione et al., 2002          | X | + |   |   | + | - | X | X |
| McFarland & Roth, 2017         | ! | - | - | - | - | - | + | ! |
| McFarland, Malone & Roth, 2017 | X | - | - | + | - | - | - | X |
| McManus et al., 2011           | ! | - |   |   | - | - | + | ! |
| Meeuwesen et al., 2006         | X | X |   |   | ? | + | ? | X |
| Moralle et al., 2016           | ? | X |   |   | ? | - | - | X |
| Moriarty et al., 2020          | - | + |   |   | - | - | + | - |
| Osim et al., 2019              | - | + |   |   | ? | - | + | ? |
| Paasche-Orlow & Roter, 2003    | X | X |   |   | + | + | - | X |
| Pardeshi et al., 2017          | X | + |   |   | ? | - | X | X |
| Park et al., 2016              | - | X |   |   | ? | - | + | X |
| Park et al., 2018              | X | ? |   |   | ? | + | + | X |
| Passalacqua, 2011              | - | ? |   |   | ? | X | - | X |
| Paul-Savoie et al., 2018       | X | ? | - | + | + | X | X | X |



# PREDICTORS OF PHYSICIAN COMPASSION: A SYSTEMATIC REVIEW

|                                     |    |    |   |   |    |    |    |    |
|-------------------------------------|----|----|---|---|----|----|----|----|
| Pawlikowski, Sak & Marczewski, 2012 | ⬇️ | ⚠️ |   |   | ?  | -  | -  | ⬇️ |
| Pensek & Selic, 2018                | ⚠️ | ⬇️ |   |   | +  | -  | +  | ⬇️ |
| Petrahai & Nwangwu, 2003            | ?  | +  |   |   | ?  | -  | ⬇️ | ⬇️ |
| Pollak et al., 2007                 | ⚠️ | ⬇️ |   |   | +  | +  | ⬇️ | ⬇️ |
| Pollak et al., 2010                 | ⬇️ | ⬇️ |   |   | +  | ⬇️ | ⬇️ | ⬇️ |
| Polonsky et al., 2014               | ⬇️ | ⚠️ |   |   | ?  | -  | -  | ⬇️ |
| Psyhojos, 2017                      | ?  | ⬇️ |   |   | +  | -  | +  | ⬇️ |
| Putrino et al., 2018                | ⬇️ | ?  |   |   | +  | +  | +  | ⬇️ |
| Reed et al., 2018                   | ⬇️ | -  | + | + | -  | -  | -  | ⬇️ |
| Roberts et al., 2011                | ⚠️ | ⚠️ |   |   | +  | ⬇️ | +  | ⬇️ |
| Rosen et al., 2006                  | ⬇️ | +  | + | + | ?  | -  | +  | ⬇️ |
| Ross & Indart, 2017                 | ⬇️ | ⬇️ |   |   | ?  | ⬇️ | -  | ⬇️ |
| Roth, Burgess & Mahowald, 2007      | ⬇️ | -  |   |   | ?  | -  | -  | ⬇️ |
| Saguem et al., 2020                 | ⬇️ | ⚠️ |   |   | +  | -  | ⬇️ | ⬇️ |
| Salyers et al., 2015                | ⬇️ | ⬇️ |   |   | ?  | ⬇️ | ⬇️ | ⬇️ |
| Sandikci et al., 2017               | ⬇️ | ⬇️ |   |   | ?  | ⬇️ | ⬇️ | ⬇️ |
| Santamaria-Garcia et al., 2017      | ⚠️ | ?  |   |   | ?  | ?  | ⬇️ | ⬇️ |
| Scott, 2011                         | ⬇️ | ⬇️ |   |   | ?  | -  | ⬇️ | ⬇️ |
| Shanafelt et al., 2005              | +  | -  |   |   | +  | -  | +  | -  |
| Shariat, Eshtad & Ansari, 2010      | ⬇️ | -  |   |   | +  | -  | ⬇️ | ⬇️ |
| Silvester et al., 2007              | ⬇️ | ?  | + | - | ?  | -  | -  | ⬇️ |
| Stanton et al., 2011                | ?  | -  |   |   | ?  | -  | +  | ?  |
| Street, Gordon & Haidet, 2007       | ⚠️ | ?  |   |   | ⬇️ | ⬇️ | -  | ⬇️ |
| Suh et al., 2012                    | ⬇️ | +  |   |   | +  | -  | +  | ⬇️ |
| van Hoorn et al., 2019              | +  | ?  | + | - | +  | +  | +  | ?  |
| Walocha et al., 2013                | ⬇️ | ?  |   |   | ?  | +  | ⬇️ | ⬇️ |
| Walocha, Tomaszewska & Mizia, 2013  | ⚠️ | ?  |   |   | ?  | +  | ⬇️ | ⬇️ |
| Wasserman et al., 1983              | +  | ?  |   |   | +  | -  | -  | ?  |
| West et al., 2006                   | ⚠️ | +  | + | + | -  | -  | +  | -  |
| West et al., 2007                   | ⬇️ | ⬇️ | + | + | ?  | -  | ⬇️ | ⬇️ |
| Wolfshohl et al., 2019              | ⬇️ | +  |   |   | +  | -  | ⬇️ | ⬇️ |
| Yuguero et al., 2017                | ⬇️ | ⬇️ |   |   | ?  | -  | ⬇️ | ⬇️ |
| Zandbelt et al., 2007               | ⚠️ | +  |   |   | -  | +  | +  | -  |
| Zenasni et al., 2012                | ⚠️ | ⚠️ |   |   | -  | -  | -  | -  |

Domains:  
D1: Bias due to confounding.  
D2: Bias due to selection of participants.  
D3: Bias in classification of interventions.  
D4: Bias due to deviations from intended interventions.  
D5: Bias due to missing data.  
D6: Bias in measurement of outcomes.  
D7: Bias in selection of the reported result.

Judgement  
⬇️ Critical  
⬇️ Serious  
⚠️ Moderate  
+ Low  
? No information

# PREDICTORS OF PHYSICIAN COMPASSION: A SYSTEMATIC REVIEW

## eSupplement 12: Risk of Bias – Qualitative studies (CASP)

### A) All studies

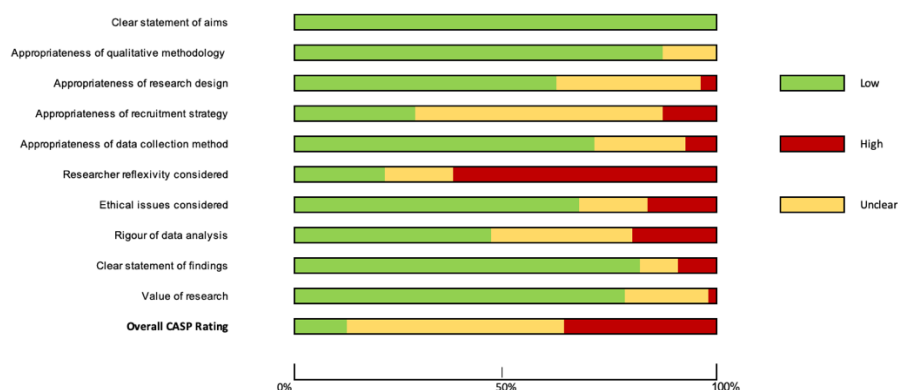

### A) Independent studies (N=53)

| Study                             | Criteria |   |   |   |   |   |   |   |   |          | Overall Assessment |
|-----------------------------------|----------|---|---|---|---|---|---|---|---|----------|--------------------|
|                                   | 1        | 2 | 3 | 4 | 5 | 6 | 7 | 8 | 9 | 10       |                    |
| Ahrweiler et al., 2014            | Y        | Y | Y | N | Y | Y | U | Y | Y | Valuable | Unclear            |
| Anandarajah & Roseman, 2014       | Y        | Y | Y | Y | Y | Y | Y | Y | Y | Valuable | Low                |
| Aomatsu et al., 2013              | Y        | Y | Y | U | Y | U | Y | U | Y | Valuable | Unclear            |
| Baker et al., 2018                | Y        | Y | Y | Y | Y | Y | Y | Y | Y | Valuable | Low                |
| Bateman et al., 2017              | Y        | Y | Y | U | Y | N | Y | U | Y | Valuable | Unclear            |
| Batley et al., 2016               | Y        | Y | Y | U | Y | Y | Y | Y | Y | Valuable | Low                |
| Battegay et al., 1991             | Y        | Y | U | U | U | N | N | U | Y | Valuable | High               |
| * Batton et al., 2011             | Y        | Y | U | Y | U | N | Y | N | U | Unclear  | High               |
| Bayne et al., 2013                | Y        | Y | Y | U | Y | N | Y | Y | Y | Valuable | Unclear            |
| Bessen et al., 2019               | Y        | Y | U | U | Y | N | U | U | Y | Valuable | High               |
| Bishop et al., 2014               | Y        | Y | Y | U | U | U | N | Y | Y | Valuable | Unclear            |
| * Brady, Bambury & O'Reilly, 2015 | Y        | U | U | U | U | U | N | N | N | Unclear  | High               |
| Branch et al., 2017               | Y        | Y | Y | N | Y | N | Y | Y | Y | Valuable | Unclear            |
| Chou, Kellom & Shea, 2014         | Y        | Y | N | Y | Y | N | Y | Y | Y | Valuable | Unclear            |
| Crowe & Brugha, 2018              | Y        | Y | Y | U | Y | N | Y | Y | U | Valuable | Unclear            |
| Daidsen & Fosgerau, 2014          | Y        | Y | Y | N | Y | U | U | Y | Y | Valuable | Unclear            |
| Derksen et al., 2015              | Y        | Y | Y | Y | Y | Y | N | U | Y | Valuable | Unclear            |
| Derksen et al., 2016              | Y        | Y | Y | Y | Y | N | Y | U | Y | Unclear  | Unclear            |
| Derksen et al., 2017              | Y        | Y | Y | U | U | U | Y | U | Y | Valuable | Unclear            |
| Epstein & Borrelli, 2001          | Y        | Y | U | U | Y | N | N | N | N | Valuable | High               |
| * Epstein et al., 2007            | Y        | Y | U | U | Y | N | Y | Y | Y | Unclear  | High               |
| Fox et al., 2009                  | Y        | Y | Y | Y | Y | Y | Y | Y | Y | Valuable | Low                |
| Gilligan et al., 2019             | Y        | Y | Y | U | U | N | Y | Y | Y | Valuable | Unclear            |

PREDICTORS OF PHYSICIAN COMPASSION: A SYSTEMATIC REVIEW

| Study                               | Criteria |   |   |   |   |   |   |   |   |          | Overall Assessment |
|-------------------------------------|----------|---|---|---|---|---|---|---|---|----------|--------------------|
|                                     | Authors  | 1 | 2 | 3 | 4 | 5 | 6 | 7 | 8 | 9        |                    |
| Gottenborg et al., 2018             | Y        | Y | U | Y | Y | N | Y | Y | Y | Valuable | Unclear            |
| Haider, Riaz & Gill, 2020           | Y        | Y | Y | U | Y | Y | U | Y | Y | Valuable | Unclear            |
| Jaye & Wilson, 2003                 | Y        | Y | U | Y | Y | N | N | Y | Y | Valuable | Unclear            |
| Kerasidou & Kingori, 2019           | Y        | Y | Y | U | Y | N | Y | U | Y | Valuable | Unclear            |
| Kerasidou, 2019                     | Y        | Y | U | U | U | N | Y | U | Y | Valuable | High               |
| Kirmayer, 2008                      | Y        | U | U | N | N | N | U | N | Y | Unclear  | High               |
| * Kobayasi et al., 2018             | Y        | Y | Y | U | Y | N | Y | Y | Y | Unclear  | Unclear            |
| Lin, Hsu & Chong, 2008              | Y        | Y | Y | U | Y | Y | Y | N | Y | Valuable | Unclear            |
| Lyness, 1993                        | Y        | Y | Y | U | Y | N | N | U | Y | Valuable | High               |
| Mahoney, Sladek & Neild, 2016       | Y        | Y | Y | U | Y | N | Y | N | Y | Valuable | Unclear            |
| Mills, Wand & Fraser, 2018          | Y        | Y | Y | U | Y | U | Y | Y | Y | Valuable | Unclear            |
| Mugleton, Guy & Howard, 2015        | Y        | Y | Y | N | Y | N | Y | N | U | Valuable | High               |
| Muslin & Schlessinger, 1971         | Y        | U | U | U | N | N | N | U | U | Unclear  | High               |
| Peng, Clarkin & Doja, 2018          | Y        | Y | Y | Y | Y | N | Y | Y | Y | Valuable | Unclear            |
| Picard et al., 2016                 | Y        | Y | Y | U | Y | U | U | Y | Y | Valuable | Unclear            |
| Pinder, 1992                        | Y        | Y | U | U | U | N | U | U | Y | Valuable | High               |
| Porthe et al., 2018                 | Y        | Y | U | Y | Y | N | Y | U | Y | Valuable | Unclear            |
| Rawal, Strahlendorf & Nimmon, 2020  | Y        | U | Y | Y | Y | Y | Y | Y | Y | Valuable | Low                |
| Rider et al., 2018                  | Y        | Y | U | U | U | U | Y | U | Y | Valuable | High               |
| * Roberts et al., 2011              | Y        | Y | Y | Y | Y | Y | Y | N | Y | Valuable | Unclear            |
| * Ross & Indart, 2017               | Y        | U | U | U | Y | U | Y | N | N | Unclear  | High               |
| Roze des Ordons et al., 2020        | Y        | Y | Y | U | Y | Y | Y | Y | Y | Valuable | Low                |
| Rubinstein & Bentwich, 2017         | Y        | Y | U | Y | Y | N | U | U | N | Unclear  | High               |
| * Salyers et al., 2015              | Y        | U | U | U | U | N | U | N | N | Unclear  | High               |
| Stein, 1986                         | Y        | U | U | N | N | N | N | N | U | Unclear  | High               |
| Stratta, Riding & Baker, 2016       | Y        | Y | U | N | N | N | Y | Y | Y | Valuable | High               |
| Swendiman et al., 2019              | Y        | Y | N | Y | Y | N | Y | Y | Y | Valuable | Unclear            |
| Uygur, Brown & Herbert, 2019        | Y        | Y | Y | Y | Y | Y | Y | Y | Y | Valuable | Low                |
| Wohlgemuth, Auerbach & Parker, 2015 | Y        | Y | Y | U | U | N | Y | Y | Y | Valuable | Unclear            |
| Woolf et al., 2007                  | Y        | Y | Y | U | U | N | Y | U | Y | Valuable | High               |

CASP criteria for qualitative studies: 1. Was there a clear statement of the aims of the research? 2. Is a qualitative methodology appropriate? 3. Was the research design appropriate to address the aims of the research? 4. Was the recruitment strategy appropriate to the aims of the research? 5. Was the data collected in a way that addressed the research issue? 6. Has the relationship between researcher and participants been adequately considered? 7. Have ethical issues been taken into consideration? 8. Was the data analysis sufficiently rigorous? 9. Is there a clear statement of findings? 10. How valuable is the research? Y = Yes, N = No, U = Unclear

PREDICTORS OF PHYSICIAN COMPASSION: A SYSTEMATIC REVIEW

eSupplement 13: GRADE-CERQual Assessment

| Domain description | Summary of review finding                                                                                                                                                                                                                          | GRADE-CREQual Assessment                                                                                                                                                                                                                                                       |                                                                                                                                                                                                          |                                                                                                                                                                                                                               |                                                                                                                                                                                                                                                                                                     | CERQual assessment         |
|--------------------|----------------------------------------------------------------------------------------------------------------------------------------------------------------------------------------------------------------------------------------------------|--------------------------------------------------------------------------------------------------------------------------------------------------------------------------------------------------------------------------------------------------------------------------------|----------------------------------------------------------------------------------------------------------------------------------------------------------------------------------------------------------|-------------------------------------------------------------------------------------------------------------------------------------------------------------------------------------------------------------------------------|-----------------------------------------------------------------------------------------------------------------------------------------------------------------------------------------------------------------------------------------------------------------------------------------------------|----------------------------|
|                    |                                                                                                                                                                                                                                                    | METHODOLOGICAL LIMITATIONS                                                                                                                                                                                                                                                     | COHERENCE                                                                                                                                                                                                | DATA ADEQUACY                                                                                                                                                                                                                 | RELEVANCE                                                                                                                                                                                                                                                                                           |                            |
| PHYSICIAN          | <b>Socio-demographic factors (N=75, quantitative=57, qualitative=14, mixed methods = 4)</b>                                                                                                                                                        |                                                                                                                                                                                                                                                                                |                                                                                                                                                                                                          |                                                                                                                                                                                                                               |                                                                                                                                                                                                                                                                                                     |                            |
|                    | <p><b>Gender</b> (N=50, quantitative=46, qualitative*=1, mixed methods^=3): females seem to be more likely to be compassionate/empathetic; although the evidence is weak as there is similar number of studies showing no gender effect at all</p> | <p><b>Moderate concerns:</b> Serious concerns due to lack of controls for confounding effects of experience, non-probability selection with small response rates and instances of selective reporting. However, the results from different quality of studies are similar.</p> | <p><b>Moderate concerns:</b> High factor coherence, although the effect is less coherent with similar amount of studies showing either positive effect of females gender or no gender effect at all.</p> | <p><b>No or minor concerns:</b> Sufficient samples, geographic diversity of data, diverse specialities, patient types; some studies have less than 25% women in their sample but that does not seem to affect the result.</p> | <p><b>No or minor concerns:</b> 38 studies assess physicians at different seniority levels and 18 - residents, the results are similar. Most of the studies cover empathy (JSPE, IRI). Results of studies related to either compassionate care (N=6) or patient-centred care (N=2) are similar.</p> | <b>Moderate confidence</b> |
|                    | <p><b>Age</b> (N=29, all quantitative): the evidence regarding the impact of age on ECRCs is conflicting and inconclusive, higher quality studies indicate either positive older age effect or no effect</p>                                       | <p><b>Serious concerns:</b> 17 out of 29 studies have serious risk of bias due to confounding, selective reporting and bias in selection of participants. Studies indicating the possibility of positive age effect, and no age effect are of higher quality</p>               | <p><b>Serious concerns:</b> High factor coherence, low effect coherence.</p>                                                                                                                             | <p><b>No or minor concerns:</b> Mostly quantitative data - sufficient, diverse samples</p>                                                                                                                                    | <p><b>Moderate concerns:</b> Only 4 studies on patient-centred/ compassionate care, but the results are similar</p>                                                                                                                                                                                 | <b>Low confidence</b>      |

PREDICTORS OF PHYSICIAN COMPASSION: A SYSTEMATIC REVIEW

| Domain description | Summary of review finding                                                                                                                                                                                                                                                                           | GRADE-CREQual Assessment                                                                                                                                                                                          |                                                                                                                                                                                          |                                                                                                                                                              |                                                                                                                     | CERQual assessment                |
|--------------------|-----------------------------------------------------------------------------------------------------------------------------------------------------------------------------------------------------------------------------------------------------------------------------------------------------|-------------------------------------------------------------------------------------------------------------------------------------------------------------------------------------------------------------------|------------------------------------------------------------------------------------------------------------------------------------------------------------------------------------------|--------------------------------------------------------------------------------------------------------------------------------------------------------------|---------------------------------------------------------------------------------------------------------------------|-----------------------------------|
|                    |                                                                                                                                                                                                                                                                                                     | METHODOLOGICAL LIMITATIONS                                                                                                                                                                                        | COHERENCE                                                                                                                                                                                | DATA ADEQUACY                                                                                                                                                | RELEVANCE                                                                                                           |                                   |
|                    | <p><b>Ethnicity/race/culture</b> (N=13, quantitative=10, qualitative*=3): ethnicity/race does not seem to be a factor clearly affecting physician ECRCs; however cultural understanding (or even possibly how the scales are read and completed) may be indicative of the perceived differences</p> | <p><b>Serious concerns</b> - all studies are of high risk of bias across all domains</p>                                                                                                                          | <p><b>Serious concerns:</b><br/>Low coherence - race/ethnicity effect would depend on geographical location and diversity, cultural understanding of constructs might have an effect</p> | <p><b>No or minor concerns:</b><br/>quantitative data, sufficient samples</p>                                                                                | <p><b>Moderate concerns:</b><br/>11/13 studies - empathy, mostly relevant to the US</p>                             | <p><b>Low confidence</b></p>      |
|                    | <p><b>Religion, spirituality, and spiritual practice (e.g., meditation, reflection, prayer)</b> (N=5: quantitative=2, qualitative*=3): as indicated mostly by qualitative studies - spirituality may positively associate with ECRCs; there is insufficient evidence with regards to religion</p>   | <p><b>No or minor concerns</b> - only one study relevant to religion with critical risk of bias due to confounding</p>                                                                                            | <p><b>No or minor concerns:</b> coherent factors and results</p>                                                                                                                         | <p><b>Moderate concerns:</b><br/>only a small number of studies, and mostly qualitative, but can be characterised by geographic diversity</p>                | <p><b>No or minor concerns:</b><br/>relevant to compassion - represents empathy, compassion and humanistic care</p> | <p><b>Moderate confidence</b></p> |
|                    | <p><b>Marital status</b> (N=12, all quantitative): being married does not seem to associate with better or worse levels of empathy</p>                                                                                                                                                              | <p><b>Moderate concerns:</b><br/>high risk of bias for the most of the studies due to limited confounders controls, and bias in selection of participants, however there higher quality studies indicative of</p> | <p><b>No or minor concerns:</b> coherent factors and results</p>                                                                                                                         | <p><b>No or minor concerns:</b><br/>diverse geographical sample (Africa, Middle East, Asia, Southern Europe and 1 study from the US), sufficient samples</p> | <p><b>Serious concerns:</b> only relevant for empathy</p>                                                           | <p><b>Low confidence</b></p>      |

PREDICTORS OF PHYSICIAN COMPASSION: A SYSTEMATIC REVIEW

| Domain description | Summary of review finding                                                                                                                                                                                       | GRADE-CERQual Assessment                                                                                                                                                                             |                                                                                                                                      |                                                                                                                                                                                                   |                                                                                                | CERQual assessment         |
|--------------------|-----------------------------------------------------------------------------------------------------------------------------------------------------------------------------------------------------------------|------------------------------------------------------------------------------------------------------------------------------------------------------------------------------------------------------|--------------------------------------------------------------------------------------------------------------------------------------|---------------------------------------------------------------------------------------------------------------------------------------------------------------------------------------------------|------------------------------------------------------------------------------------------------|----------------------------|
|                    |                                                                                                                                                                                                                 | METHODOLOGICAL LIMITATIONS                                                                                                                                                                           | COHERENCE                                                                                                                            | DATA ADEQUACY                                                                                                                                                                                     | RELEVANCE                                                                                      |                            |
|                    |                                                                                                                                                                                                                 | the final results of no effect of marital status                                                                                                                                                     |                                                                                                                                      |                                                                                                                                                                                                   |                                                                                                |                            |
|                    | <b>Children</b> (N=14, quantitative=11, qualitative*=3): it is inconclusive whether having children influences ECRCs, it is unlikely that having children can affect ECRCs negatively (except during residency) | <b>Moderate concerns:</b> equal number of high and moderate risk of bias, without contradicting results. 5 serious and 1 critical risk of bias studies due to confounding/selection of participants. | <b>Serious concerns:</b> High factor coherence, low effect coherence; limited coherence between quantitative and qualitative studies | <b>No or minor concerns</b>                                                                                                                                                                       | <b>Serious concerns:</b> for empathy - mixed results, for compassionate care - non-significant | <b>Low confidence</b>      |
|                    | <b>Upbringing</b> (N=3: quantitative=1; qualitative*=2) upbringing may influence how compassionate the physician is, however, the direction will most likely depend on the type of upbringing                   | <b>No or minor concerns:</b> the studies have low-to-moderate risk of bias                                                                                                                           | <b>Moderate concerns:</b> difficult to tell due to factor being too broad                                                            | <b>Serious concerns:</b> Limited number of studies, but diverse sample of physicians geographically and by gender, although ethnicity only reported by 1 study (88% white); low number of studies | <b>No or minor concerns:</b> 2 compassion, 1 empathy                                           | <b>Low confidence</b>      |
|                    | <b>Siblings</b> (N=2; both quantitative): there is insufficient evidence to make conclusions about sibling's effect on ECRCs                                                                                    | <b>Serious concerns</b> - one study did not test for confounders and another had a smaller sample without                                                                                            | <b>Serious concerns:</b> there is little coherence in assessing how and in which way                                                 | <b>Serious concerns:</b> one study focuses on psychiatric trainees and another on                                                                                                                 | <b>Serious concerns:</b> both on empathy                                                       | <b>Very low confidence</b> |

PREDICTORS OF PHYSICIAN COMPASSION: A SYSTEMATIC REVIEW

| Domain description | Summary of review finding                                                                                                                                                                                                                                                                                                                                                          | GRADE-CREQual Assessment                                                                                                                                                                                                                                                                                                                    |                                                                                                                                                                                                                                                                     |                                                                                                                                             |                                                                                                                    | CERQual assessment         |
|--------------------|------------------------------------------------------------------------------------------------------------------------------------------------------------------------------------------------------------------------------------------------------------------------------------------------------------------------------------------------------------------------------------|---------------------------------------------------------------------------------------------------------------------------------------------------------------------------------------------------------------------------------------------------------------------------------------------------------------------------------------------|---------------------------------------------------------------------------------------------------------------------------------------------------------------------------------------------------------------------------------------------------------------------|---------------------------------------------------------------------------------------------------------------------------------------------|--------------------------------------------------------------------------------------------------------------------|----------------------------|
|                    |                                                                                                                                                                                                                                                                                                                                                                                    | METHODOLOGICAL LIMITATIONS                                                                                                                                                                                                                                                                                                                  | COHERENCE                                                                                                                                                                                                                                                           | DATA ADEQUACY                                                                                                                               | RELEVANCE                                                                                                          |                            |
|                    |                                                                                                                                                                                                                                                                                                                                                                                    | mentioning how representative it may be                                                                                                                                                                                                                                                                                                     | having siblings can influence compassion                                                                                                                                                                                                                            | residents in Tunisia and Korea respectively                                                                                                 |                                                                                                                    |                            |
|                    | <b>Living situation</b> (N=4, all quantitative): there is insufficient evidence to make conclusions about living situation effect on ECRCs                                                                                                                                                                                                                                         | <b>Serious concerns</b> - risk of selection of participants bias exists                                                                                                                                                                                                                                                                     | <b>Serious concerns:</b> there is little coherence in factors related to living situation                                                                                                                                                                           | <b>Moderate concerns:</b> small number of studies, but diverse geographical representation                                                  | <b>No or minor concerns:</b> 3 on compassionate care, 1 on empathy                                                 | <b>Low confidence</b>      |
|                    | <b>Past illness (of self or relative/child/colleague) and caregiving experience</b> (N=13: quantitative=4, qualitative*=6, mixed-methods^=3): it is likely that personal illness experience, relatives or own children illness experience, and caregiving experience associates with greater ECRCs; however, detachment can also happen to avoid being upset - countertransference | <b>Moderate concerns</b> - although half of the studies have serious risk of bias, half of the studies have low-to-moderate risk and the results are similar. High risk of bias mostly arises from the lack of controls for confounders, 2 studies have high risk of bias due to selection of participants and 2 due to selective reporting | <b>Moderate concerns:</b> the illness experience factors are coherent, although often own/other's illness are not separated (pulled together). Only two factors - colleagues being infected at work and own experience with psychotherapy - are somewhat different. | <b>Moderate concerns:</b> The amount of studies is modest; most of higher quality evidence is qualitative but the data is sufficiently rich | <b>No or minor concerns:</b> 5 studies on compassion or compassionate care, 8 studies on empathy, similar outcomes | <b>Moderate confidence</b> |
|                    | <b>Quality of life (N=45, quantitative=22, qualitative=20, mixed-methods=3)</b>                                                                                                                                                                                                                                                                                                    |                                                                                                                                                                                                                                                                                                                                             |                                                                                                                                                                                                                                                                     |                                                                                                                                             |                                                                                                                    |                            |
|                    | <b>Overall quality of life</b> (N=2: quantitative)                                                                                                                                                                                                                                                                                                                                 | <b>Serious concerns</b>                                                                                                                                                                                                                                                                                                                     | <b>Serious concerns:</b> the definition of the factor is too broad                                                                                                                                                                                                  | <b>Serious concerns:</b> only two studies is inadequate to make conclusions                                                                 | <b>Serious concerns:</b> relevant to empathy                                                                       | <b>Very low confidence</b> |

PREDICTORS OF PHYSICIAN COMPASSION: A SYSTEMATIC REVIEW

| Domain description | Summary of review finding                                                                                                                                                                                                                                                                                | GRADE-CERQual Assessment                                                                                                                                                     |                                                                                                                                                       |                                                                                                                                                                                                                                                                                                                                                     |                                                                                                                                                                                    | CERQual assessment                |
|--------------------|----------------------------------------------------------------------------------------------------------------------------------------------------------------------------------------------------------------------------------------------------------------------------------------------------------|------------------------------------------------------------------------------------------------------------------------------------------------------------------------------|-------------------------------------------------------------------------------------------------------------------------------------------------------|-----------------------------------------------------------------------------------------------------------------------------------------------------------------------------------------------------------------------------------------------------------------------------------------------------------------------------------------------------|------------------------------------------------------------------------------------------------------------------------------------------------------------------------------------|-----------------------------------|
|                    |                                                                                                                                                                                                                                                                                                          | METHODOLOGICAL LIMITATIONS                                                                                                                                                   | COHERENCE                                                                                                                                             | DATA ADEQUACY                                                                                                                                                                                                                                                                                                                                       | RELEVANCE                                                                                                                                                                          |                                   |
|                    | <p><b>Private life and relationships</b> (N=8: quantitative=1, qualitative*=7): it is likely that good personal relationships and social support associate with ECRCs positively, while problems in personal life - negatively</p>                                                                       | <p><b>No or minor concerns</b> - only one study showed serious risk of bias as there were no confounding controls, all other studies showed low-to-moderate risk of bias</p> | <p><b>No or minor concerns:</b> the studies are coherent and can be classified according to personal issues, and relationships and social support</p> | <p><b>Moderate concerns:</b> Seven out of eight studies are qualitative which points at potential factors. The quantitative study has high risk of bias, and the results are difficult to interpret. There are 3 studies by Derksen et al (2015, 2016, 2017) that rely on the same sample. Therefore, the adequacy of data has serious concerns</p> | <p><b>Moderate concerns:</b> The results are relevant as they outline compassion and related constructs in a broad sense (e.g. empathy, compassion, humanistic care, cynicism)</p> | <p><b>Moderate confidence</b></p> |
|                    | <p><b>Work-related quality of life</b> (N=8: quantitative=3, qualitative*=5): satisfaction with work and work-life balance/integration may associate with increased ECRCs; however, there might be different aspects of satisfaction work which might be at play that will affect ECRCs differently.</p> | <p><b>Moderate concerns</b> - only one study showed serious risk of bias in the way the outcomes was measured; the results would not change if the study was excluded</p>    | <p><b>Moderate concerns:</b> The studies are coherent but we discovered that the factors might be too broad</p>                                       | <p><b>No or minor concerns:</b> There are quantitative and qualitative studies that align. Geographic, construct, and specialization diversity of samples.</p>                                                                                                                                                                                      | <p><b>No or minor concerns</b></p>                                                                                                                                                 | <p><b>Moderate confidence</b></p> |



PREDICTORS OF PHYSICIAN COMPASSION: A SYSTEMATIC REVIEW

| Domain description | Summary of review finding                                                                                                                                                                                                                                                                                          | GRADE-CERQual Assessment                                                                                                                                                                                                                            |                                                                                                                                                                                                            |                                                                                                                                                                                                                                               |                                                                                                                                                                                            | CERQual assessment                |
|--------------------|--------------------------------------------------------------------------------------------------------------------------------------------------------------------------------------------------------------------------------------------------------------------------------------------------------------------|-----------------------------------------------------------------------------------------------------------------------------------------------------------------------------------------------------------------------------------------------------|------------------------------------------------------------------------------------------------------------------------------------------------------------------------------------------------------------|-----------------------------------------------------------------------------------------------------------------------------------------------------------------------------------------------------------------------------------------------|--------------------------------------------------------------------------------------------------------------------------------------------------------------------------------------------|-----------------------------------|
|                    |                                                                                                                                                                                                                                                                                                                    | METHODOLOGICAL LIMITATIONS                                                                                                                                                                                                                          | COHERENCE                                                                                                                                                                                                  | DATA ADEQUACY                                                                                                                                                                                                                                 | RELEVANCE                                                                                                                                                                                  |                                   |
|                    | <p><b>Leisure activities</b> (N=6: quantitative=2, qualitative*= 4) such as spending time with friends and family, time alone, taking holidays, travelling, and exercise; exposure to art, music, nature, literature, and other cultures. Having more leisure activities may be associated with greater ECRCs.</p> | <p><b>No or minor concerns:</b> although there is one study with a critical confounding bias (confounding inherently non-controlable), all the other studies pointing at leisure activity as a positive factor are low-to-moderate risk of bias</p> | <p><b>Moderate concerns:</b> The scope of leisure activity might be too broad.</p>                                                                                                                         | <p><b>Moderate concerns:</b> All studies indicating that leisure activities might be a positive factor are qualitative</p>                                                                                                                    | <p><b>No or minor concerns:</b> Relevant to compassion and related constructs</p>                                                                                                          | <p><b>Moderate confidence</b></p> |
|                    | <p><b>Self-care</b> (N=4, quantitative=1, qualitative*=3): self-care might be helpful in maintaining ECRCs, but the evidence is scarce, and self-care is not well-defined</p>                                                                                                                                      | <p><b>No or minor concerns -</b> only one study showed serious risk of bias as there were no confounding controls, all other studies showed low-to-moderate risk of bias</p>                                                                        | <p><b>Moderate concerns:</b> Self-care is insufficiently defined</p>                                                                                                                                       | <p><b>Moderate concerns:</b> Limited number of studies, majority of studies are qualitative</p>                                                                                                                                               | <p><b>Moderate concerns:</b> Only in two studies compassion or related constructs are primary outcomes, one study is spirituality-focused so might conceptualise self-care differently</p> | <p><b>Moderate confidence</b></p> |
|                    | <p><b>Current physical health</b> (N=15: quantitative=4, qualitative*=9, mixed methods^=2): feeling exhausted and tired might associate with lower levels of ECRCs</p>                                                                                                                                             | <p><b>Moderate concerns</b> for negative factors and serious concerns for positive and non-significant factors</p>                                                                                                                                  | <p><b>Moderate concerns:</b> The definition of general physical health is very broad. The results regarding tiredness and exhaustion, and sleep, seem to be the most coherent, although the letter has</p> | <p><b>Moderate concerns:</b> Negative factors, although the most robust, are only from qualitative studies. The samples are small. Geographically diverse, good representation of specialisations, covering both residents and physicians</p> | <p><b>Moderate concerns:</b> mostly relevant for empathy</p>                                                                                                                               | <p><b>Moderate confidence</b></p> |

PREDICTORS OF PHYSICIAN COMPASSION: A SYSTEMATIC REVIEW

| Domain description | Summary of review finding                                                                                                                        | GRADE-CREQual Assessment                                                                                                                                                  |                                               |                                                       |                                          | CERQual assessment         |
|--------------------|--------------------------------------------------------------------------------------------------------------------------------------------------|---------------------------------------------------------------------------------------------------------------------------------------------------------------------------|-----------------------------------------------|-------------------------------------------------------|------------------------------------------|----------------------------|
|                    |                                                                                                                                                  | METHODOLOGICAL LIMITATIONS                                                                                                                                                | COHERENCE                                     | DATA ADEQUACY                                         | RELEVANCE                                |                            |
|                    |                                                                                                                                                  |                                                                                                                                                                           | serious risk of bias concerns.                |                                                       |                                          |                            |
|                    | <b>Current mental health</b> (N=2, all quantitative): there is insufficient evidence whether one's mental health associates with ECRC            | <b>Serious concerns:</b><br>There is a moderate risk of bias concern for mental wellbeing study and serious concerns for anxiety study due to the measurement of outcomes | <b>Serious concerns:</b><br>Limited coherence | <b>Serious concerns:</b><br>Limited number of studies | <b>No or minor concerns:</b><br>Relevant | <b>Low confidence</b>      |
|                    | <b>Financial</b> (N=2, quantitative=1, qualitative*=1) there is insufficient evidence whether one's financial circumstances associate with ECRCs | <b>No or minor concerns</b>                                                                                                                                               | <b>Serious concerns:</b><br>Limited coherence | <b>Serious concerns:</b><br>Limited number of studies | <b>No or minor concerns:</b><br>Relevant | <b>Very low confidence</b> |

PREDICTORS OF PHYSICIAN COMPASSION: A SYSTEMATIC REVIEW

| Domain description | Summary of review finding                                                                                                                                                                                                                                                                                           | GRADE-CREQual Assessment                                                                                                                                                                                                                                                                                                                                                                                                                  |                                                                                                                                                                                                                                                                      |                                                                                                                                            |                                                                                               | CERQual assessment                |
|--------------------|---------------------------------------------------------------------------------------------------------------------------------------------------------------------------------------------------------------------------------------------------------------------------------------------------------------------|-------------------------------------------------------------------------------------------------------------------------------------------------------------------------------------------------------------------------------------------------------------------------------------------------------------------------------------------------------------------------------------------------------------------------------------------|----------------------------------------------------------------------------------------------------------------------------------------------------------------------------------------------------------------------------------------------------------------------|--------------------------------------------------------------------------------------------------------------------------------------------|-----------------------------------------------------------------------------------------------|-----------------------------------|
|                    |                                                                                                                                                                                                                                                                                                                     | METHODOLOGICAL LIMITATIONS                                                                                                                                                                                                                                                                                                                                                                                                                | COHERENCE                                                                                                                                                                                                                                                            | DATA ADEQUACY                                                                                                                              | RELEVANCE                                                                                     |                                   |
|                    | <p><b>Burnout and burnout subscales</b> (N=23, quantitative=17, qualitative*=5, mixed methods^=1): burnout negatively affects ECRCs, the evidence with relation to subscales is conflicting</p>                                                                                                                     | <p><b>Moderate concerns for burnout, serious concerns for subscales:</b> Only 6 studies had low or moderate risk of bias and for 3 studies it was difficult to tell. High risk of bias came mostly from confounding and selective reporting, and selection of participants and measurement bias. Due to low number of studies with low-moderate risk of bias we can only speak about burnout in general but not the burnout subscales</p> | <p><b>No or minor concerns</b> - the measurements are coherent, however qualitative studies might conceptualise burnout differently. Also, the results related to burnout subscales are less coherent and we can not draw conclusion regarding burnout subscales</p> | <p><b>No or minor concerns:</b> The evidence shows good diversity of samples and rich data.</p>                                            | <p><b>Moderate concerns:</b> 17 empathy, 5 compassion, 1 humanistic care, similar results</p> | <p><b>Moderate confidence</b></p> |
|                    | <p><b>Compassion fatigue</b> (N=5: quantitative=1, qualitative*=4): there is insufficient evidence to conclude what role does compassion fatigue plays in ECRCs, it is also not clear whether compassion fatigue arises from the use of compassion or from something else (e.g., listening to problems, stress)</p> | <p><b>Moderate concerns</b> - only one study showed serious risk of bias due to confounding</p>                                                                                                                                                                                                                                                                                                                                           | <p><b>Serious concerns:</b> The conceptualisation of compassion fatigue is unclear</p>                                                                                                                                                                               | <p><b>Moderate concerns:</b> Qualitative evidence with small sample sized except for one study, the qualitative studies have rich data</p> | <p><b>No or minor concerns:</b> Relevant to compassion and related constructs</p>             | <p><b>Low confidence</b></p>      |

PREDICTORS OF PHYSICIAN COMPASSION: A SYSTEMATIC REVIEW

| Domain description | Summary of review finding                                                                                                                                                                                                                                                     | GRADE-CREQual Assessment                                                                                                                                                                                                                                                                                                                                                                                         |                                                                                                                                                                                                                                                                                         |                                                                                                           |                                                                                                                                                      | CERQual assessment                |
|--------------------|-------------------------------------------------------------------------------------------------------------------------------------------------------------------------------------------------------------------------------------------------------------------------------|------------------------------------------------------------------------------------------------------------------------------------------------------------------------------------------------------------------------------------------------------------------------------------------------------------------------------------------------------------------------------------------------------------------|-----------------------------------------------------------------------------------------------------------------------------------------------------------------------------------------------------------------------------------------------------------------------------------------|-----------------------------------------------------------------------------------------------------------|------------------------------------------------------------------------------------------------------------------------------------------------------|-----------------------------------|
|                    |                                                                                                                                                                                                                                                                               | METHODOLOGICAL LIMITATIONS                                                                                                                                                                                                                                                                                                                                                                                       | COHERENCE                                                                                                                                                                                                                                                                               | DATA ADEQUACY                                                                                             | RELEVANCE                                                                                                                                            |                                   |
|                    | <p><b>Stress</b> (N=7: quantitative=2, qualitative*=5): qualitative data suggests that stress may associate negatively with ECRCs</p>                                                                                                                                         | <p><b>Moderate concerns</b> - biased studies do not affect the conclusions</p>                                                                                                                                                                                                                                                                                                                                   | <p><b>No or minor concerns</b> - the measurements are coherent, however qualitative studies might conceptualise stress differently.</p>                                                                                                                                                 | <p><b>Moderate concerns:</b> with an exception of 1 study (Kemper et al., 2020) the samples are small</p> | <p><b>No or minor concerns:</b> Relevant to compassion and related constructs</p>                                                                    | <p><b>Moderate confidence</b></p> |
|                    | <p><b>Dispositional features (N=63, quantitative=29, qualitative=33, mixed methods=2)</b></p>                                                                                                                                                                                 |                                                                                                                                                                                                                                                                                                                                                                                                                  |                                                                                                                                                                                                                                                                                         |                                                                                                           |                                                                                                                                                      |                                   |
|                    | <p><b>Personality/traits</b> (N=30: quantitative=22, qualitative*=8): it is likely that pro-social traits and ability to deal with and recognize one's emotions positively associate with ECRCs, whereas higher emotionality and idealism associate with ECRCs negatively</p> | <p><b>Moderate concerns</b> - the larger part of evidence presents with a high risk of bias, mostly in the domain of confounding bias, but also selective reporting, and selection of participants. However, the studies with low or moderate risk of bias (7) or studies where there is insufficient information to understand risk of bias (2) show similar results as the studies with high risk of bias.</p> | <p><b>Serious concerns:</b> The factors comprising this evidence are incoherent with the exceptions of empathic personality (3 studies), perspective taking ability (3 studies), resilience (3 studies), self-esteem (2 studies) and ability to stand in patient shoes (2 studies).</p> | <p><b>No or minor concerns:</b> The evidence shows good diversity of samples and rich data.</p>           | <p><b>Moderate concerns:</b> mostly empathy orientated but also includes compassionate care, patient-centred care, humanistic care and cynicism.</p> | <p><b>Low confidence</b></p>      |

PREDICTORS OF PHYSICIAN COMPASSION: A SYSTEMATIC REVIEW

| Domain description | Summary of review finding                                                                                                                                                                                       | GRADE-CREQual Assessment                                                                                                                                                                         |                                                               |                                                                                                                                                             |                                                                                                                                               | CERQual assessment         |
|--------------------|-----------------------------------------------------------------------------------------------------------------------------------------------------------------------------------------------------------------|--------------------------------------------------------------------------------------------------------------------------------------------------------------------------------------------------|---------------------------------------------------------------|-------------------------------------------------------------------------------------------------------------------------------------------------------------|-----------------------------------------------------------------------------------------------------------------------------------------------|----------------------------|
|                    |                                                                                                                                                                                                                 | METHODOLOGICAL LIMITATIONS                                                                                                                                                                       | COHERENCE                                                     | DATA ADEQUACY                                                                                                                                               | RELEVANCE                                                                                                                                     |                            |
|                    | <b>Values</b> (N=10: all qualitative*): having empathy and compassion as a value may associate with increased ECRCs                                                                                             | <b>No or minor concerns</b>                                                                                                                                                                      | <b>Moderate concerns</b> - mostly coherent evidence           | <b>Moderate concerns:</b> Only qualitative studies - makes it difficult to generalize. The studies are predominantly of highly developed Western countries. | <b>Moderate concerns:</b> Relevant mostly to empathy, but also compassion and related constructs                                              | <b>Moderate confidence</b> |
|                    | <b>Attitudes</b> (N=11: quantitative=4, qualitative*=7): positive or non-judgmental attitudes and respect might associate with greater ECRCs, prejudice and negative judgement might associate with lower ECRCs | <b>No or minor concerns,</b> the studies with high risk of bias (3) do not contradict the results. Risk of bias arises from selection of participant, measurement, and lack of reflexivity bias. | <b>No or minor concerns:</b> The evidence is mostly coherent. | <b>Moderate concerns</b> - predominantly qualitative data, with small samples, although the populations of physicians are diverse.                          | <b>Moderate concerns:</b> Mostly relevant for empathy, but also features compassion, patient-centred behaviour, humanistic care and cynicism. | <b>Moderate confidence</b> |

PREDICTORS OF PHYSICIAN COMPASSION: A SYSTEMATIC REVIEW

| Domain description | Summary of review finding                                                                                                                                                                                                                                                                                                                                                                                                                                                                                                                                                                                                       | GRADE-CREQual Assessment                                                                                                        |                                                                     |                                                                                                                  |                                                                                   | CERQual assessment                |
|--------------------|---------------------------------------------------------------------------------------------------------------------------------------------------------------------------------------------------------------------------------------------------------------------------------------------------------------------------------------------------------------------------------------------------------------------------------------------------------------------------------------------------------------------------------------------------------------------------------------------------------------------------------|---------------------------------------------------------------------------------------------------------------------------------|---------------------------------------------------------------------|------------------------------------------------------------------------------------------------------------------|-----------------------------------------------------------------------------------|-----------------------------------|
|                    |                                                                                                                                                                                                                                                                                                                                                                                                                                                                                                                                                                                                                                 | METHODOLOGICAL LIMITATIONS                                                                                                      | COHERENCE                                                           | DATA ADEQUACY                                                                                                    | RELEVANCE                                                                         |                                   |
|                    | <p><b>Beliefs/motivations/understanding</b> (N=18: quantitative=2, qualitative*=14, mixed methods^=2): positive beliefs about the importance of compassion/empathy in medical care (professional responsibility, outcomes), and motivation to maintain good standards of care and to get more job satisfaction from practicing compassion may positively associate with ECRCs; on a contrary, beliefs that compassion/empathy may negatively affect objectivity, mental health, or does not substitute an "action" may hinder ECRCs. The quality of evidence regarding negative contribution of negative beliefs is poorer.</p> | <p><b>No or minor concerns:</b> for positive beliefs and motivations, serious concerns for negative beliefs and motivations</p> | <p><b>No or minor concerns:</b> The results are mostly coherent</p> | <p><b>Moderate concerns:</b> The evidence is mostly qualitative and mostly from the developed Western world.</p> | <p><b>No or minor concerns:</b> Relevant to compassion and related constructs</p> | <p><b>Moderate confidence</b></p> |

PREDICTORS OF PHYSICIAN COMPASSION: A SYSTEMATIC REVIEW

| Domain description | Summary of review finding                                                                                                                                                                                     | GRADE-CREQual Assessment                                                                                                                                                                                                                                                                                                             |                                                                                                                                |                                                                                                                                                              |                                                                                       | CERQual assessment                |
|--------------------|---------------------------------------------------------------------------------------------------------------------------------------------------------------------------------------------------------------|--------------------------------------------------------------------------------------------------------------------------------------------------------------------------------------------------------------------------------------------------------------------------------------------------------------------------------------|--------------------------------------------------------------------------------------------------------------------------------|--------------------------------------------------------------------------------------------------------------------------------------------------------------|---------------------------------------------------------------------------------------|-----------------------------------|
|                    |                                                                                                                                                                                                               | METHODOLOGICAL LIMITATIONS                                                                                                                                                                                                                                                                                                           | COHERENCE                                                                                                                      | DATA ADEQUACY                                                                                                                                                | RELEVANCE                                                                             |                                   |
|                    | <p><b>Feelings/emotions</b> (N=16: quantitative=5, qualitative*=1): ECRC may be hindered by fear of overidentification, feelings of uncertainty and associated with it anxiety, and feelings of isolation</p> | <p><b>Moderate concerns:</b><br/>For studies with serious risk of bias we noticed the presence of confounding, selective reporting and selection of participant bias for quantitative, and lack of consideration of relationships between researcher and the participants bias. The risk of bias does not influence the evidence</p> | <p><b>Moderate concerns:</b> There is better coherence for the emotions and feelings that may affect compassion negatively</p> | <p><b>Moderate concerns:</b><br/>The high quality evidence is mostly qualitative with small samples, although the populations of physicians are diverse.</p> | <p><b>No or minor concerns:</b><br/>Relevant to compassion and related constructs</p> | <p><b>Moderate confidence</b></p> |

PREDICTORS OF PHYSICIAN COMPASSION: A SYSTEMATIC REVIEW

| Domain description                                                                          | Summary of review finding                                                                                                                                                                                                                                                                                                                                                                                                                                                                                                                                                                                  | GRADE-CERQual Assessment                                                                                                                                                                                                                                                                                                                                                                                             |                                                                      |                                                                                                                                                                                                   |                                                                                                                                                                                      | CERQual assessment                |
|---------------------------------------------------------------------------------------------|------------------------------------------------------------------------------------------------------------------------------------------------------------------------------------------------------------------------------------------------------------------------------------------------------------------------------------------------------------------------------------------------------------------------------------------------------------------------------------------------------------------------------------------------------------------------------------------------------------|----------------------------------------------------------------------------------------------------------------------------------------------------------------------------------------------------------------------------------------------------------------------------------------------------------------------------------------------------------------------------------------------------------------------|----------------------------------------------------------------------|---------------------------------------------------------------------------------------------------------------------------------------------------------------------------------------------------|--------------------------------------------------------------------------------------------------------------------------------------------------------------------------------------|-----------------------------------|
|                                                                                             |                                                                                                                                                                                                                                                                                                                                                                                                                                                                                                                                                                                                            | METHODOLOGICAL LIMITATIONS                                                                                                                                                                                                                                                                                                                                                                                           | COHERENCE                                                            | DATA ADEQUACY                                                                                                                                                                                     | RELEVANCE                                                                                                                                                                            |                                   |
|                                                                                             | <p><b>Coping mechanisms and facilitative behaviors</b> (N=31: quantitative=5, qualitative*=25, mixed methods^=1): it is evident that reflective practices such as personal or group reflection and mindfulness, and exploring emotions are likely to positively associate with ECRCs, additionally practicing compassion will likely increase future compassion. Doubting or criticizing oneself, on a contrary, will likely associate with ECRC negatively; lack of positive coping strategies and defense mechanisms such as detachment, avoidance, hiding emotions will likely result in lower ECRC</p> | <p><b>Moderate concerns</b> - although there are studies with serious risk of bias (due to selective reporting, selection of participants and confounding bias for quantitative, and relationships between researchers and participants, recruitment, and data collection methods for qualitative studies), more than half of the studies had low-to-moderate risk of bias concerns and the results were similar</p> | <p><b>Moderate concerns:</b> The results are moderately coherent</p> | <p><b>Moderate concerns:</b> The high quality evidence is mostly qualitative with small samples, although the populations of physicians are diverse and the number of studies is satisfactory</p> | <p><b>Moderate concerns:</b> 21 studies on empathy or derivatives, 5 studies on compassion or compassionate care, 6 studies on humanistic care, person-centred care, or cynicism</p> | <p><b>Moderate confidence</b></p> |
| <p><b>Professional factors (N=86, quantitative=72, qualitative=11, mixed methods=3)</b></p> |                                                                                                                                                                                                                                                                                                                                                                                                                                                                                                                                                                                                            |                                                                                                                                                                                                                                                                                                                                                                                                                      |                                                                      |                                                                                                                                                                                                   |                                                                                                                                                                                      |                                   |



PREDICTORS OF PHYSICIAN COMPASSION: A SYSTEMATIC REVIEW

| Domain description | Summary of review finding                                                                                                                                                                                                                                                                                                                                                                                                                      | GRADE-CERQual Assessment                                                                                                                                                                                                               |                                                                                            |                                                                   |                                                                                                                                                            | CERQual assessment           |
|--------------------|------------------------------------------------------------------------------------------------------------------------------------------------------------------------------------------------------------------------------------------------------------------------------------------------------------------------------------------------------------------------------------------------------------------------------------------------|----------------------------------------------------------------------------------------------------------------------------------------------------------------------------------------------------------------------------------------|--------------------------------------------------------------------------------------------|-------------------------------------------------------------------|------------------------------------------------------------------------------------------------------------------------------------------------------------|------------------------------|
|                    |                                                                                                                                                                                                                                                                                                                                                                                                                                                | METHODOLOGICAL LIMITATIONS                                                                                                                                                                                                             | COHERENCE                                                                                  | DATA ADEQUACY                                                     | RELEVANCE                                                                                                                                                  |                              |
|                    | <p><b>Specialties/satisfaction with career</b> (N=39, quantitative=33, qualitative*=3, mixed methods^=3): it is possible that physicians in patient-centered/relational specialties are more compassionate/empathetic than in specialties that are technology-orientated, although the evidence with regards to particular specialties is mixed, and there is a high number of studies showing that specialty is not a significant factor.</p> | <p><b>Serious concerns:</b><br/>26/33 studies have serious or critical risk of bias mostly due to confounding bias, selection of participants bias, and to a lesser extend selective reporting and bias in measurement of outcomes</p> | <p><b>Serious concerns:</b><br/>Although the factors are coherent, the results are not</p> | <p><b>No or minor concerns:</b><br/>Large and diverse samples</p> | <p><b>Moderate concerns:</b> Of most relevance to empathy (22 studies), but the results are similar for compassion and related constructs (16 studies)</p> | <p><b>Low confidence</b></p> |

PREDICTORS OF PHYSICIAN COMPASSION: A SYSTEMATIC REVIEW

| Domain description | Summary of review finding                                                                                                                                                                                                                                                                                                                         | GRADE-CREQual Assessment                                                                                                                                                                                                                                                                                        |                                                                                                                                                                                                                                                                                                                 |                                                                   |                                                                                                                                         | CERQual assessment           |
|--------------------|---------------------------------------------------------------------------------------------------------------------------------------------------------------------------------------------------------------------------------------------------------------------------------------------------------------------------------------------------|-----------------------------------------------------------------------------------------------------------------------------------------------------------------------------------------------------------------------------------------------------------------------------------------------------------------|-----------------------------------------------------------------------------------------------------------------------------------------------------------------------------------------------------------------------------------------------------------------------------------------------------------------|-------------------------------------------------------------------|-----------------------------------------------------------------------------------------------------------------------------------------|------------------------------|
|                    |                                                                                                                                                                                                                                                                                                                                                   | METHODOLOGICAL LIMITATIONS                                                                                                                                                                                                                                                                                      | COHERENCE                                                                                                                                                                                                                                                                                                       | DATA ADEQUACY                                                     | RELEVANCE                                                                                                                               |                              |
|                    | <p><b>Professional stage and experience</b> (N=64, quantitative=53, qualitative*=8, mixed methods^=3): experience is likely to associate positively with ECRCs; although the evidence is weak as there is similar number of studies showing no experience effect at all; it is not clear whether ECRC increases or decreases during residency</p> | <p><b>Moderate concerns</b> - although more than a half of the studies have high risk of bias (mostly confounding, selective reporting, and selection of participants), the results are consistent, with higher quality studies present to a higher extent for positive factors, and factors with no effect</p> | <p><b>Serious concerns:</b><br/>The coherence in how experience is conceptualised can be problematic - ranging from having clinical experience, self-report of the extensiveness of the experience, years of practice, years since graduation etc. Professional status/seniority are also not well defined.</p> | <p><b>No or minor concerns:</b><br/>Large and diverse samples</p> | <p><b>Moderate concerns:</b> Most of the studies (48) are focused on empathy, empathetic concern, or empathic opportunity responses</p> | <p><b>Low confidence</b></p> |
|                    | <p><b>Training/competency</b> (N=22: quantitative=17, qualitative*=5, mixed methods^=1): professional training and competency are likely to positively associate with ECRC, while lack of professional competency and training would produce an opposite result</p>                                                                               | <p><b>Moderate concerns:</b><br/>For a number of studies, there is a serious risk of bias in confounding, selection of participants, and selective reporting domains, but it is not relevant for the conclusions we draw.</p>                                                                                   | <p><b>Serious concerns:</b><br/>There is a lack of coherence in what is understood by competence and what type of training is conducive of compassion</p>                                                                                                                                                       | <p><b>No or minor concerns:</b><br/>Large and diverse samples</p> | <p><b>No or minor concerns:</b><br/>Relevant to compassion and related constructs - results are similar across the studies</p>          | <p><b>Low confidence</b></p> |

PREDICTORS OF PHYSICIAN COMPASSION: A SYSTEMATIC REVIEW

| Domain description                                              | Summary of review finding                                                                                                                                        | GRADE-CERQual Assessment                                                                                                                                                                     |                                                                                                  |                                                                             |                                                                                                                     | CERQual assessment         |
|-----------------------------------------------------------------|------------------------------------------------------------------------------------------------------------------------------------------------------------------|----------------------------------------------------------------------------------------------------------------------------------------------------------------------------------------------|--------------------------------------------------------------------------------------------------|-----------------------------------------------------------------------------|---------------------------------------------------------------------------------------------------------------------|----------------------------|
|                                                                 |                                                                                                                                                                  | METHODOLOGICAL LIMITATIONS                                                                                                                                                                   | COHERENCE                                                                                        | DATA ADEQUACY                                                               | RELEVANCE                                                                                                           |                            |
|                                                                 | <b>Extra-professional activity</b> (N=11: quantitative=8, qualitative*=2, mixed methods^=1): having an extra-professional activity is possibly helpful for ECRCs | <b>No or minor concerns</b> - the majority of the studies are of low-moderate risk of bias, with exception of 3 studies that do not change the results                                       | <b>Serious concerns:</b> There could be more coherence is studying extra-professional activities | <b>No or minor concerns:</b> Large and diverse samples                      | <b>No or minor concerns:</b> Relevant to compassion and related constructs - results are similar across the studies | <b>Low confidence</b>      |
|                                                                 | <b>Medical errors/litigation</b> (N=1 quantitative): insufficient evidence                                                                                       | <b>No or minor concerns</b>                                                                                                                                                                  | NA                                                                                               | <b>Serious concerns:</b> 184 internal medicine residents, US, 35.9% females | <b>Serious concerns:</b> Empathy - IRI                                                                              | <b>Low confidence</b>      |
| ENVIRONMENTAL                                                   | <b>Healthcare settings (N=16, quantitative=13, qualitative=2, mixed methods=1)</b>                                                                               |                                                                                                                                                                                              |                                                                                                  |                                                                             |                                                                                                                     |                            |
|                                                                 | It is likely that broader settings of practice have little impact on ECRC                                                                                        | <b>Serious concerns</b> - most studies have high confounding, selection of participants, and selective reporting bias                                                                        | <b>Moderate coherence</b>                                                                        | <b>No or minor concerns:</b> Large and diverse samples                      | <b>Moderate concerns:</b> Mostly relevant to empathy with 1 study mentioning compassion and 1 cynicism              | <b>Low confidence</b>      |
|                                                                 | <b>Organizational settings (N=45, quantitative=15, qualitative=29)</b>                                                                                           |                                                                                                                                                                                              |                                                                                                  |                                                                             |                                                                                                                     |                            |
| (articles=57, quantitative=25, qualitative=30, mixed methods=2) | <b>General working conditions rating</b> (N=2, quantitative=1, mixed methods^=1): limited evidence to make conclusion                                            | <b>Serious concerns:</b> Serious risk of bias due to confounding, selective reporting (Mahoney, Sladek & Neild, 2016^ ) and selection of participants bias (Mahoney, Sladek & Neild, 2016^ ) | <b>Moderate concerns:</b> Coherenct but too broad                                                | <b>Serious concerns:</b> Insufficient number of studies                     | <b>Serious concerns:</b> Empathy only                                                                               | <b>Very low confidence</b> |

PREDICTORS OF PHYSICIAN COMPASSION: A SYSTEMATIC REVIEW

| Domain description | Summary of review finding                                                                                                                                                                                                                                                                | GRADE-CERQual Assessment                                                                                                                                                                                                                                                                                                                                                       |                                                                                                                       |                                                                                                                                                                                                                                        |                                                                                   | CERQual assessment            |
|--------------------|------------------------------------------------------------------------------------------------------------------------------------------------------------------------------------------------------------------------------------------------------------------------------------------|--------------------------------------------------------------------------------------------------------------------------------------------------------------------------------------------------------------------------------------------------------------------------------------------------------------------------------------------------------------------------------|-----------------------------------------------------------------------------------------------------------------------|----------------------------------------------------------------------------------------------------------------------------------------------------------------------------------------------------------------------------------------|-----------------------------------------------------------------------------------|-------------------------------|
|                    |                                                                                                                                                                                                                                                                                          | METHODOLOGICAL LIMITATIONS                                                                                                                                                                                                                                                                                                                                                     | COHERENCE                                                                                                             | DATA ADEQUACY                                                                                                                                                                                                                          | RELEVANCE                                                                         |                               |
|                    | <p><b>Organizational structure</b> (N=5, all qualitative*): it is possible that hierarchical environments are not conducive of ECRCs, although the evidence is small; we cannot make conclusions about the practice size as observations in two studies are based on the same sample</p> | <p><b>No or minor concerns:</b> only one study had high risk of bias because it did not provide enough information on multiple domains</p>                                                                                                                                                                                                                                     | <p><b>No or minor concerns:</b> Coherent for hierarchical structures</p>                                              | <p><b>No or minor concerns:</b> Small number of qualitative studies only; but hierarchical structures related studies are using different qualitative designs so are triangulated</p>                                                  | <p><b>No or minor concerns:</b> Relevant to compassion and related constructs</p> | <p><b>High confidence</b></p> |
|                    | <p><b>Organizational resources</b> (N=11: quantitative=2, qualitative*=9): organizational resources, especially continuous education and counseling, good leadership, human resources support, and physical resources, are facilitative of ECRCs</p>                                     | <p><b>No or minor concerns:</b> one quantitative study had high risk of bias on confounding domain, two qualitative studies had high risk of bias due to limited information (1) or due to high bias in recruitment, data collection, and considering relationships between researchers and participants (1). The high risk of bias studies are irrelevant to the results.</p> | <p><b>No or minor concerns:</b> The studies are coherent and understand what is meant by resources very similarly</p> | <p><b>No or minor concerns:</b> There is adequate qualitative data, on the domain of continuous education and counseling. Quantitative data confirms qualitative. The samples are mostly based in the developed Western countries.</p> | <p><b>No or minor concerns:</b> Relevant to compassion and related constructs</p> | <p><b>High confidence</b></p> |

PREDICTORS OF PHYSICIAN COMPASSION: A SYSTEMATIC REVIEW

| Domain description | Summary of review finding                                                                                                                                                                                                                                                                                                                          | GRADE-CREQual Assessment                                          |                                                                                                                                |                                                                                                         |                                                                                   | CERQual assessment                |
|--------------------|----------------------------------------------------------------------------------------------------------------------------------------------------------------------------------------------------------------------------------------------------------------------------------------------------------------------------------------------------|-------------------------------------------------------------------|--------------------------------------------------------------------------------------------------------------------------------|---------------------------------------------------------------------------------------------------------|-----------------------------------------------------------------------------------|-----------------------------------|
|                    |                                                                                                                                                                                                                                                                                                                                                    | METHODOLOGICAL LIMITATIONS                                        | COHERENCE                                                                                                                      | DATA ADEQUACY                                                                                           | RELEVANCE                                                                         |                                   |
|                    | <p><b>Operational environment</b> (N=36: quantitative=13, qualitative*=23): time constraints, bureaucracy, lack of continuity and austerity policies associate with lower ECRCs, efficient organizational practices, such as good triage, seem to increase ECRCs; the evidence regarding the amount of work or economic profit is inconclusive</p> | <p><b>No or minor concerns -</b> mostly good quality evidence</p> | <p><b>No or minor concerns:</b> Mostly coherent</p>                                                                            | <p><b>No or minor concerns:</b> Adequate amount of data and samples diversity</p>                       | <p><b>No or minor concerns:</b> Relevant to compassion and related constructs</p> | <p><b>High confidence</b></p>     |
|                    | <p><b>Proximal (clinical) environment</b> (N=12: quantitative=3, qualitative*=9): stressful clinical environment (busyness, interruptions) is not conducive of ECRCs</p>                                                                                                                                                                           | <p><b>No or minor concerns -</b> mostly good quality evidence</p> | <p><b>No or minor concerns:</b> The evidence consist of many separate factors that comprise stressful clinical environment</p> | <p><b>Moderate concerns:</b> Mostly qualitative evidence, but adequate amount of data and diversity</p> | <p><b>No or minor concerns:</b> Relevant to compassion and related constructs</p> | <p><b>Moderate confidence</b></p> |

PREDICTORS OF PHYSICIAN COMPASSION: A SYSTEMATIC REVIEW

| Domain description | Summary of review finding                                                                                                                                                                                                                                                                                                                                    | GRADE-CREQual Assessment                                                                                                                                                         |                                                                                                                                                                                                             |                                                                                                                  |                                                                               | CERQual assessment         |
|--------------------|--------------------------------------------------------------------------------------------------------------------------------------------------------------------------------------------------------------------------------------------------------------------------------------------------------------------------------------------------------------|----------------------------------------------------------------------------------------------------------------------------------------------------------------------------------|-------------------------------------------------------------------------------------------------------------------------------------------------------------------------------------------------------------|------------------------------------------------------------------------------------------------------------------|-------------------------------------------------------------------------------|----------------------------|
|                    |                                                                                                                                                                                                                                                                                                                                                              | METHODOLOGICAL LIMITATIONS                                                                                                                                                       | COHERENCE                                                                                                                                                                                                   | DATA ADEQUACY                                                                                                    | RELEVANCE                                                                     |                            |
|                    | <b>Collegial climate (N=19, quantitative=6, qualitative=13)</b>                                                                                                                                                                                                                                                                                              |                                                                                                                                                                                  |                                                                                                                                                                                                             |                                                                                                                  |                                                                               |                            |
|                    | Positive role models and collegial support associate with greater ECRCs, lack of support and unprofessional superiors will hinder ECRCs                                                                                                                                                                                                                      | <b>Moderate concerns:</b><br>No or minor concerns for qualitative studies, serious concerns for quantitative studies due to confounding bias and bias in measurement of outcomes | <b>Moderate concerns:</b><br>Qualitative and quantitative results differ with regards to teamwork/relationships with colleagues (positive/no effect); however, qualitative results are of superior quality. | <b>Moderate concerns:</b><br>Adequate amount of data, primarily developed Western countries                      | <b>No or minor concerns:</b><br>Relevant to compassion and related constructs | <b>Moderate confidence</b> |
|                    | <b>Organizational culture and values (N=21, qualitative=20, mixed methods=1)</b>                                                                                                                                                                                                                                                                             |                                                                                                                                                                                  |                                                                                                                                                                                                             |                                                                                                                  |                                                                               |                            |
|                    | Supportive organizational culture is likely to affect ECRCs positively, efficiency-driven, disease-centered, evidence-based/guideline driven healthcare with emphasis on business is likely to hinder ECRCs. Additionally, hidden curriculum and emphasizing intelligence and excellence values in medical education are not conducive of compassionate care | <b>No or minor concerns</b>                                                                                                                                                      | <b>No or minor concerns:</b> The coherence of results is evident, although the factors are very diverse.                                                                                                    | <b>Moderate concerns:</b><br>The evidence is mostly qualitative, but sufficient (rich data, diverse population). | <b>No or minor concerns:</b><br>Relevant to compassion and related constructs | <b>Moderate confidence</b> |

PREDICTORS OF PHYSICIAN COMPASSION: A SYSTEMATIC REVIEW

| Domain description | Summary of review finding                                                                                                                                                                                                                                      | GRADE-CREQual Assessment                                                                                                                                                 |                                                                                            |                                                                                                    |                                                                                   | CERQual assessment            |
|--------------------|----------------------------------------------------------------------------------------------------------------------------------------------------------------------------------------------------------------------------------------------------------------|--------------------------------------------------------------------------------------------------------------------------------------------------------------------------|--------------------------------------------------------------------------------------------|----------------------------------------------------------------------------------------------------|-----------------------------------------------------------------------------------|-------------------------------|
|                    |                                                                                                                                                                                                                                                                | METHODOLOGICAL LIMITATIONS                                                                                                                                               | COHERENCE                                                                                  | DATA ADEQUACY                                                                                      | RELEVANCE                                                                         |                               |
| PATIENT AND FAMILY | <b>Relational factors (N=19, quantitative=9, qualitative=10)</b>                                                                                                                                                                                               |                                                                                                                                                                          |                                                                                            |                                                                                                    |                                                                                   |                               |
|                    | <p><b>Connection/interaction</b> (N=13: quantitative=6, qualitative*=7): a presence of personal "click" and easy, open communication are likely to positively associate with ECRC; communication difficulties are likely to negatively associate with ECRC</p> | <p><b>No or minor concerns</b> for qualitative studies, serious concerns for quantitative studies mostly due to confounding bias and bias in measurement of outcomes</p> | <p><b>No or minor concerns:</b> The results are mostly coherent</p>                        | <p><b>No or minor concerns:</b> Adequate amount of data, primarily developed Western countries</p> | <p><b>No or minor concerns:</b> Relevant to compassion and related constructs</p> | <p><b>High confidence</b></p> |
|                    | <p>(articles=37, quantitative=19, qualitative=17, mixed methods=2)</p> <p><b>Patient-doctor similarity</b> (N=8: quantitative=4, qualitative*=4): there is conflicting evidence of doctor-patient perceived similarity effect</p>                              | <p><b>Serious concerns</b> due to confounding, selective reporting and lack of consideration about relationships between researcher and participants</p>                 | <p><b>Serious concerns:</b> While the factors are coherent, the results are incoherent</p> | <p><b>Serious concerns:</b> The evidence base is limited</p>                                       | <p><b>No or minor concerns:</b> Relevant to compassion and related constructs</p> | <p><b>Low confidence</b></p>  |

PREDICTORS OF PHYSICIAN COMPASSION: A SYSTEMATIC REVIEW

| Domain description | Summary of review finding                                                                                                                                                                                                                                                                                                                                                                                                                                                                                                                        | GRADE-CREQual Assessment                                                                                                                                                                                                                                                   |                                                            |                                                                                                    |                                                                                      | CERQual assessment                |
|--------------------|--------------------------------------------------------------------------------------------------------------------------------------------------------------------------------------------------------------------------------------------------------------------------------------------------------------------------------------------------------------------------------------------------------------------------------------------------------------------------------------------------------------------------------------------------|----------------------------------------------------------------------------------------------------------------------------------------------------------------------------------------------------------------------------------------------------------------------------|------------------------------------------------------------|----------------------------------------------------------------------------------------------------|--------------------------------------------------------------------------------------|-----------------------------------|
|                    |                                                                                                                                                                                                                                                                                                                                                                                                                                                                                                                                                  | METHODOLOGICAL LIMITATIONS                                                                                                                                                                                                                                                 | COHERENCE                                                  | DATA ADEQUACY                                                                                      | RELEVANCE                                                                            |                                   |
|                    | <b>Patient factors (N=30, quantitative=17, qualitative=13)</b>                                                                                                                                                                                                                                                                                                                                                                                                                                                                                   |                                                                                                                                                                                                                                                                            |                                                            |                                                                                                    |                                                                                      |                                   |
|                    | <p><b>Patient socio-demographic factors</b> (N=14: quantitative=10, qualitative*=4): there is a possibility of positive bias in providing compassionate care towards higher class (education/income) patients, or vulnerable populations (highly disadvantaged, elderly, children); there is a possibility of negative bias in providing compassionate care towards minorities (i.e. immigrants and people with language barrier) and Black/African-American patients; patients' gender, age and marital status show no effect on compassion</p> | <p><b>Moderate concerns:</b> quantitative evidence is prone to high risk of bias due to confounding and selective reporting; however confounding mostly concerns physician's attributes, thus should not preclude us from making conclusions regarding patient-factors</p> | <p><b>Moderate concerns</b> - mostly coherent evidence</p> | <p><b>No or minor concerns:</b> Adequate amount of data, primarily developed Western countries</p> | <p><b>Moderate concerns:</b> Mostly relevant to empathy and patient-centred care</p> | <p><b>Moderate confidence</b></p> |



PREDICTORS OF PHYSICIAN COMPASSION: A SYSTEMATIC REVIEW

| Domain description | Summary of review finding                                                                                                                                                                                                                                                                                                                                                                                                                                                                                                                       | GRADE-CERQual Assessment                                                                                                                                                                                                                                                                                  |                                                                                                                                                                         |                                                                                                               |                                                                                                                                                     | CERQual assessment                |
|--------------------|-------------------------------------------------------------------------------------------------------------------------------------------------------------------------------------------------------------------------------------------------------------------------------------------------------------------------------------------------------------------------------------------------------------------------------------------------------------------------------------------------------------------------------------------------|-----------------------------------------------------------------------------------------------------------------------------------------------------------------------------------------------------------------------------------------------------------------------------------------------------------|-------------------------------------------------------------------------------------------------------------------------------------------------------------------------|---------------------------------------------------------------------------------------------------------------|-----------------------------------------------------------------------------------------------------------------------------------------------------|-----------------------------------|
|                    |                                                                                                                                                                                                                                                                                                                                                                                                                                                                                                                                                 | METHODOLOGICAL LIMITATIONS                                                                                                                                                                                                                                                                                | COHERENCE                                                                                                                                                               | DATA ADEQUACY                                                                                                 | RELEVANCE                                                                                                                                           |                                   |
|                    | <p><b>Patient behavior/emotions</b> (N=19, quantitative=8, qualitative*=11): cooperative, thankful patients are more likely to receive compassionate care, while uncooperative patients with problematic behavior (e.g. anger, aggression, entitlement), patients who cross moral boundaries (i.e. drug dealers, abusers), or patients who lack understanding and do not express emotions (worse communicators) are less likely to receive compassionate care; patients preferences, self-efficacy, or distress possibly have little effect</p> | <p><b>Moderate concerns</b> - although there are studies with serious risk of bias (5) (due to confounding, measurement of outcomes, and selective reporting) - the higher proportion of studies are of low and moderate bias and the studies with serious risk of bias do not contradict the results</p> | <p><b>Moderate concerns:</b> There is coherence at higher level of observations, but the types of the behaviours that negatively affect compassion are very diverse</p> | <p><b>Moderate concerns:</b> Adequate amount of data and samples diversity, however the samples are small</p> | <p><b>Moderate concerns:</b> Mostly relevant to empathy, but also features compassion (3), person- or patient-centred care (2) and cynicism (1)</p> | <p><b>Moderate confidence</b></p> |

PREDICTORS OF PHYSICIAN COMPASSION: A SYSTEMATIC REVIEW

| Domain description | Summary of review finding                                                                                                                                                                                        | GRADE-CREQual Assessment                                                                                                                                                                                                                          |                                                                                                                                                                          |                                                                                |                                                                     | CERQual assessment                |
|--------------------|------------------------------------------------------------------------------------------------------------------------------------------------------------------------------------------------------------------|---------------------------------------------------------------------------------------------------------------------------------------------------------------------------------------------------------------------------------------------------|--------------------------------------------------------------------------------------------------------------------------------------------------------------------------|--------------------------------------------------------------------------------|---------------------------------------------------------------------|-----------------------------------|
|                    |                                                                                                                                                                                                                  | METHODOLOGICAL LIMITATIONS                                                                                                                                                                                                                        | COHERENCE                                                                                                                                                                | DATA ADEQUACY                                                                  | RELEVANCE                                                           |                                   |
|                    | <p><b>Doctor's perception of patients' motives</b> (N=7: quantitative=4, qualitative*=3): physician's negative perceptions of patient's motives and personality are likely to undermine ECRCs</p>                | <p><b>Moderate concerns</b> - all quantitative studies are of high risk of bias due to confounding, selection of participants and measurement. However, higher quality qualitative studies agree with the lower quality quantitative studies.</p> | <p><b>Moderate concerns:</b> There is coherence at higher level of observations, but the types of the perceptions that negatively affect compassion are more diverse</p> | <p><b>Moderate concerns:</b> The number of high quality studies is limited</p> | <p><b>Serious concerns:</b> Mostly relevant for empathy</p>         | <p><b>Low confidence</b></p>      |
|                    | <p><b>Patient family</b> (N=2: qualitative* and quantitative): there is insufficient amount of evidence to make conclusions about the family influence, but it appears similar to that of patients' behavior</p> | <p><b>Moderate concerns:</b> No or minor concerns for qualitative and serious concerns for quantitative study</p>                                                                                                                                 | <p><b>Serious concerns:</b> Difficult to tell due to low amount of evidence</p>                                                                                          | <p><b>Serious concerns:</b> Only 2 studies</p>                                 | <p><b>Serious concerns:</b> Relevant to empathy and cynicism</p>    | <p><b>Low confidence</b></p>      |
|                    | <p><b>Situational factors (N=8, quantitative=6, qualitative=1, mixed methods=1)</b></p>                                                                                                                          |                                                                                                                                                                                                                                                   |                                                                                                                                                                          |                                                                                |                                                                     |                                   |
|                    | <p>The evidence in relation to situational factors is of low quality, and scarce - insufficient to make conclusions about the effect</p>                                                                         | <p><b>Serious concerns</b> - only one study with moderate risk of bias</p>                                                                                                                                                                        | <p><b>Serious concerns:</b> Lack of coherence</p>                                                                                                                        | <p><b>Serious concerns:</b> The data is adequate</p>                           | <p><b>Serious concerns:</b> Would be relevant to empathy mostly</p> | <p><b>Very low confidence</b></p> |

PREDICTORS OF PHYSICIAN COMPASSION: A SYSTEMATIC REVIEW

| Domain description                                                   | Summary of review finding                                                                                                                                                                                                                                          | GRADE-CREQual Assessment                                                                                                                                                                                                 |                                               |                                                                                                                                                                       |                                                                                                                     | CERQual assessment         |
|----------------------------------------------------------------------|--------------------------------------------------------------------------------------------------------------------------------------------------------------------------------------------------------------------------------------------------------------------|--------------------------------------------------------------------------------------------------------------------------------------------------------------------------------------------------------------------------|-----------------------------------------------|-----------------------------------------------------------------------------------------------------------------------------------------------------------------------|---------------------------------------------------------------------------------------------------------------------|----------------------------|
|                                                                      |                                                                                                                                                                                                                                                                    | METHODOLOGICAL LIMITATIONS                                                                                                                                                                                               | COHERENCE                                     | DATA ADEQUACY                                                                                                                                                         | RELEVANCE                                                                                                           |                            |
| CLINICAL<br><br>(articles = 23, quantitative = 13, qualitative = 10) | <b>Clinical factors (N=23, quantitative=13, qualitative=10)</b>                                                                                                                                                                                                    |                                                                                                                                                                                                                          |                                               |                                                                                                                                                                       |                                                                                                                     |                            |
|                                                                      | <b>Pain</b> (N=5, quantitative=4, qualitative*=1): there is too little evidence to make conclusions, however, type and performance of pain might be important for ECRCs                                                                                            | <b>Serious concerns</b> - only one study with low risk of bias                                                                                                                                                           | <b>Serious concerns:</b><br>Lack of coherence | <b>Serious concerns:</b><br>3 studies are in a context of chronic pain and two studies use the data from the same sample. Only relevant to North America (US, Canada) | <b>Moderate concerns:</b><br>Mostly relevant for patient-centred care                                               | <b>Very low confidence</b> |
|                                                                      | <b>Injury/illness type</b> (N=12, quantitative=7, qualitative=5): it is difficult to make conclusions - the evidence is incoherent; broadly illness with more complex or psychosomatic symptomatology, or illness that is stigmatized seems to predict lower ECRCs | <b>Serious concerns:</b><br>More than a half of studies have a serious risk of bias due to confounding bias, bias in selection of participants, and not considering the relationship between researcher and participants | <b>Serious concerns:</b><br>Lack of coherence | <b>No or minor concerns:</b><br>The data is adequate                                                                                                                  | <b>Moderate concerns:</b><br>Mostly relevant to empathy, but also caring behaviour (1) and patient-centred care (1) | <b>Low confidence</b>      |

PREDICTORS OF PHYSICIAN COMPASSION: A SYSTEMATIC REVIEW

| Domain description | Summary of review finding                                                                                                                                                                                                    | GRADE-CERQual Assessment                                                                                                        |                                                                                                                    |                                                                        |                                                                                       | CERQual assessment         |
|--------------------|------------------------------------------------------------------------------------------------------------------------------------------------------------------------------------------------------------------------------|---------------------------------------------------------------------------------------------------------------------------------|--------------------------------------------------------------------------------------------------------------------|------------------------------------------------------------------------|---------------------------------------------------------------------------------------|----------------------------|
|                    |                                                                                                                                                                                                                              | METHODOLOGICAL LIMITATIONS                                                                                                      | COHERENCE                                                                                                          | DATA ADEQUACY                                                          | RELEVANCE                                                                             |                            |
|                    | <b>Acuity/severity</b> (N=5: quantitative=2, qualitative*=3): non-acute patients who are getting better are less likely to receive ECRCs                                                                                     | <b>No or minor concerns:</b> one quantitative study had high risk of bias on confounding domain due to measurements of outcomes | <b>Moderate concerns:</b> The evidence is more coherent on the aspect of acuity, but not on the aspect of severity | <b>Moderate concerns:</b> Small samples, limited number of studies     | <b>No or minor concerns:</b> Relevant to compassion and compassion-related constructs | <b>Moderate confidence</b> |
|                    | <b>Terminal illness</b> (N=3, all qualitative*): the limited evidence does not allow to make conclusions                                                                                                                     | <b>Moderate concerns</b> due to not considering the relationship between researcher and participants                            | <b>Moderate concerns:</b> The factors are moderately coherent                                                      | <b>Serious concerns:</b> Small samples, very limited number of studies | <b>No or minor concerns:</b> Relevant to compassion                                   | <b>Low confidence</b>      |
|                    | <b>Comorbidities</b> (N=8: quantitative=6, qualitative*=2): due to low quality of evidence it is hard to make conclusions; preliminary mental illness co-morbidity and substance use may potentially affect ECRCs negatively | <b>Serious</b> confounding and selective reporting risk of bias                                                                 | <b>Moderate concerns:</b> The factors are moderately coherent                                                      | <b>No or minor concerns:</b> The data is adequate                      | <b>Moderate concerns:</b> Relevant to empathy and patient-centred care                | <b>Low confidence</b>      |
|                    | <b>Frequent presenters</b> (N=3, quantitative=2, qualitative*=1) the evidence is small and inconclusive; there is a possibility that frequent presentation may affect ECRCs negatively                                       | <b>Moderate concerns</b> - one study showed serious risk of bias on multiple domains                                            | <b>Moderate concerns:</b> The factors are coherent, but the effects are incoherent                                 | <b>Serious concerns:</b> limited number of studies                     | <b>Moderate concerns:</b> Relevant to empathy, cynicism, and patient-centred care     | <b>Low confidence</b>      |

## PREDICTORS OF PHYSICIAN COMPASSION: A SYSTEMATIC REVIEW

### eSupplement 14: Excluded Studies

#### A) Primary searches

| Study (authors)                  | title                                                                                                                                                | journal                                                                                            | volume | issue | REASONS FOR EXCLUSION             |
|----------------------------------|------------------------------------------------------------------------------------------------------------------------------------------------------|----------------------------------------------------------------------------------------------------|--------|-------|-----------------------------------|
| Reynolds et al., 2019            | Fighting the flinch: experimentally induced compassion makes a difference in health care providers                                                   | British journal of health psychology                                                               | 24     | 4     | <50% SAMPLE; NO SEPARATE ANALYSIS |
| Dev et al., 2019                 | Variation in the barriers to compassion across healthcare training and disciplines: a cross-sectional study of doctors, nurses, and medical students | International journal of nursing studies                                                           | 90     |       | <50% SAMPLE; NO SEPARATE ANALYSIS |
| Williams, Kinnear & Victor, 2016 | 'It's the little things that count': healthcare professionals' views on delivering dignified care: a qualitative study                               | Journal of advanced nursing                                                                        | 72     | 4     | <50% SAMPLE; NO SEPARATE ANALYSIS |
| Sturzu et al., 2019              | Empathy and burnout - a cross-sectional study among mental healthcare providers in France                                                            | Journal of medicine and life                                                                       | 12     | 1     | <50% SAMPLE; NO SEPARATE ANALYSIS |
| Deng et al., 2019                | The current status and the influencing factors of humanistic care ability among a group of medical professionals in Western China                    | Technology and health care : official journal of the European Society for Engineering and Medicine | 27     | 2     | <50% SAMPLE; NO SEPARATE ANALYSIS |
| Singh et al., 2018               | Healthcare providers' perspectives on perceived barriers and facilitators of compassion: Results from a grounded theory study                        | Journal of clinical nursing                                                                        | 27     | 9     | <50% SAMPLE; NO SEPARATE ANALYSIS |
| Mills, Wand & Fraser, 2018       | Examining self-care, self-compassion and compassion for others: a cross-sectional survey of palliative care nurses and doctors                       | International journal of palliative nursing                                                        | 24     | 1     | <50% SAMPLE; NO SEPARATE ANALYSIS |
| Yuguero et al., 2017             | Descriptive study of association between quality of care and empathy and burnout in primary care                                                     | BMC medical ethics                                                                                 | 18     | 1     | <50% SAMPLE; NO SEPARATE ANALYSIS |
| Tierney et al., 2017             | Enabling the flow of compassionate care: a grounded theory study                                                                                     | BMC health services research                                                                       | 17     | 1     | <50% SAMPLE; NO SEPARATE ANALYSIS |
| Martin et al., 2015              | Clinicians' recognition and management of emotions during difficult healthcare conversations                                                         | Patient education and counseling                                                                   | 98     | 10    | <50% SAMPLE; NO SEPARATE ANALYSIS |

## PREDICTORS OF PHYSICIAN COMPASSION: A SYSTEMATIC REVIEW

| Study (authors)                   | title                                                                                                                             | journal                                              | volume | issue | REASONS FOR EXCLUSION             |
|-----------------------------------|-----------------------------------------------------------------------------------------------------------------------------------|------------------------------------------------------|--------|-------|-----------------------------------|
| Chapman & Martin, 2014            | Perceptions of Australian emergency staff towards patients presenting with deliberate self-poisoning: a qualitative perspective   | International emergency nursing                      | 22     | 3     | <50% SAMPLE; NO SEPARATE ANALYSIS |
| Brown et al., 2014                | Practical compassions: repertoires of practice and compassion talk in acute mental healthcare                                     | Sociology of health & illness                        | 36     | 3     | <50% SAMPLE; NO SEPARATE ANALYSIS |
| Dewar & Nolan, 2013               | Caring about caring: developing a model to implement compassionate relationship centred care in an older people care setting      | International journal of nursing studies             | 50     | 9     | <50% SAMPLE; NO SEPARATE ANALYSIS |
| Goodridge et al., 2008            | Caring for critically ill patients with advanced COPD at the end of life: a qualitative study                                     | Intensive & critical care nursing                    | 24     | 3     | <50% SAMPLE; NO SEPARATE ANALYSIS |
| Almerud et al., 2008              | Caught in an artificial split: a phenomenological study of being a caregiver in the technologically intense environment           | Intensive & critical care nursing                    | 24     | 2     | <50% SAMPLE; NO SEPARATE ANALYSIS |
| McLaughlin et al., 2006           | Illicit drug users in Northern Ireland: perceptions and experiences of health and social care professionals                       | Journal of psychiatric and mental health nursing     | 13     | 6     | <50% SAMPLE; NO SEPARATE ANALYSIS |
| Nicolaidis, Curry & Gerrity, 2005 | Health care workers' expectations and empathy toward patients in abusive relationships                                            | The Journal of the American Board of Family Practice | 18     | 3     | <50% SAMPLE; NO SEPARATE ANALYSIS |
| DiLalla et al., 2004              | Effect of gender, age, and relevant course work on attitudes toward empathy, patient spirituality, and physician wellness         | Teaching and learning in medicine                    | 16     | 2     | <50% SAMPLE; NO SEPARATE ANALYSIS |
| Bensimon, Wiss & Banker, 2019     | Impact of camp discovery volunteerism on provider burnout and empathy                                                             | Journal of the American Academy of Dermatology       |        |       | <50% SAMPLE; NO SEPARATE ANALYSIS |
| Bodner et al., 2015               | The attitudes of psychiatric hospital staff toward hospitalization and treatment of patients with borderline personality disorder | BMC Psychiatry                                       | 15     | 1     | <50% SAMPLE; NO SEPARATE ANALYSIS |
| Beste et al., 2015                | Primary care providers report challenges to cirrhosis management and specialty care coordination                                  | Digestive Diseases and Sciences                      | 60     | 9     | <50% SAMPLE; NO SEPARATE ANALYSIS |
| Bogiatzaki et al., 2019           | Empathy and burnout of healthcare professionals in public hospitals of Greece                                                     | International Journal of Caring Sciences             | 12     | 2     | <50% SAMPLE; NO SEPARATE ANALYSIS |
| Eechoud et al., 2017              | Perspectives of oncology health workers in Flanders on caring for patients of non-Western descent                                 | European Journal of Cancer Care                      | 26     | 6     | <50% SAMPLE; NO SEPARATE ANALYSIS |

## PREDICTORS OF PHYSICIAN COMPASSION: A SYSTEMATIC REVIEW

| Study (authors)              | title                                                                                                                                                                     | journal                                                                        | volume | issue | REASONS FOR EXCLUSION                                       |
|------------------------------|---------------------------------------------------------------------------------------------------------------------------------------------------------------------------|--------------------------------------------------------------------------------|--------|-------|-------------------------------------------------------------|
| Flynn, 2016                  | Who cares? A critical discussion of the value of caring from a patient and healthcare professional perspective                                                            | International Journal of Orthopaedic & Trauma Nursing                          | 20     |       | <50% SAMPLE; NO SEPARATE ANALYSIS                           |
| Austin, 2013                 | The relationship between work stressors and clinical empathy for hospital based physicians and nurses                                                                     | Dissertation Abstracts International: Section B: The Sciences and Engineering  | 74     | 5     | <50% SAMPLE; NO SEPARATE ANALYSIS                           |
| Lin, 2012                    | Empathy and avoidance in treating patients living with HIV/AIDS (PLWHA) among service providers in China                                                                  | AIDS Care                                                                      | 24     | 11    | <50% SAMPLE; NO SEPARATE ANALYSIS                           |
| Garrett, 1999                | Stress, coping, empathy, secondary traumatic stress and burnout in healthcare providers working with HIV-infected individuals. (health care providers, immune deficiency) | Dissertation Abstracts International Section A: Humanities and Social Sciences | 60     | 4     | <50% SAMPLE; NO SEPARATE ANALYSIS                           |
| Fouad Kamel, 2013            | The relationship between emotional awareness and empathetic response among psychiatric hospital staff                                                                     | Life Science Journal                                                           | 10     | 3     | <50% SAMPLE; NO SEPARATE ANALYSIS                           |
| Francis et al., 2005         | When smokers are resistant to change: Experimental analysis of the effect of patient resistance on practitioner behaviour                                                 | Addiction                                                                      | 100    | 8     | <50% SAMPLE; NO SEPARATE ANALYSIS                           |
| Beardsmore & McSherry, 2017  | Healthcare workers' perceptions of organisational culture and the impact on the delivery of compassionate quality care                                                    | J Res Nurs                                                                     | 22     | 1     | <50% SAMPLE; NO SEPARATE ANALYSIS                           |
| Yuguero et al., 2017         | Empathy and burnout of emergency professionals of a health region: a cross-sectional study.                                                                               | Medicine                                                                       |        |       | <50% SAMPLE; NO SEPARATE ANALYSIS                           |
| Crawford et al., 2013        | The language of compassion in acute mental health care.                                                                                                                   | Qualitative Health Research                                                    | 23     |       | <50% SAMPLE; NO SEPARATE ANALYSIS                           |
| Tišanská & Kožený, 2012      | Measuring empathetic sensitivity of Czech physicians                                                                                                                      |                                                                                |        |       | INSUFFICIENT INFORMATION: REQUESTED FROM AUTHOR/NO RESPONSE |
| Lindy, Green & Patrick, 1980 | The internship: some disquieting findings                                                                                                                                 | The American journal of psychiatry                                             | 137    | 1     | INTERVENTION                                                |

## PREDICTORS OF PHYSICIAN COMPASSION: A SYSTEMATIC REVIEW

| Study (authors)              | title                                                                                                                                                                                   | journal                                                                                                                                            | volume | issue | REASONS FOR EXCLUSION |
|------------------------------|-----------------------------------------------------------------------------------------------------------------------------------------------------------------------------------------|----------------------------------------------------------------------------------------------------------------------------------------------------|--------|-------|-----------------------|
| O'Carroll, 2017              | A review of a GP registrar-run mobile health clinic for homeless people                                                                                                                 | Irish Journal of Medical Science                                                                                                                   | 186    | 3     | INTERVENTION          |
| Bareman et al., 1993         | Dissatisfied patients: Improving general practitioners' initial reactions                                                                                                               | Medical Education                                                                                                                                  | 27     | 4     | INTERVENTION          |
| Newbronner et al., 2017      | Creating better doctors: Exploring the value of learning medicine in primary care                                                                                                       | Education for Primary Care                                                                                                                         | 28     | 4     | INTERVENTION          |
| Eurelings-Bontekoe, 1991     | The relationship between personal characteristics of general practitioners and their sensitivity to psychosocial problems: A secondary analysis of World Health Organization (WHO) data | De relatie tussen persoonlijke kenmerken van huisartsen en hun sensitiviteit voor psychosociale problematiek. Een secundaire analyse van WHO-data. | 19     | 5     | LANG: DUTCH           |
| Shariat & Kaykhavoni, 2010   | Empathy in medical residents at Iran University of Medical Sciences                                                                                                                     | Iranian Journal of Psychiatry and Clinical Psychology                                                                                              | 16     | 3     | LANG: FARSI           |
| Marcus-Bolohan, 1991         | Empathy and detachment in the doctor-patient relationship                                                                                                                               | Empathie et detachment dans la relation medecin-patient.                                                                                           | 35     | 1     | LANG: FRENCH          |
| Brocher, 1985                | Self and physician: the humaneness in medicine                                                                                                                                          | Selbst und Arzt. Das Humane in der Medizin.                                                                                                        | 30     | 1     | LANG: GERMAN          |
| Jablonkai, 1989              | Being personal and impersonal in healing work                                                                                                                                           | Szemelyesseg es szemelytelenseg a gyógyító munkában.                                                                                               | 45     | 5     | LANG: HUNGARIAN       |
| Bonino & Giordanengo, 1993   | Sharing, but not too much: a research about health workers                                                                                                                              | L'empatia: condividere, ma non troppo. Una ricerca sugli operatori sanitari.                                                                       | 17     | 3     | LANG: ITALIAN         |
| Szkup-Jablonska et al., 2013 | Cultural competence assessment among health care workers                                                                                                                                | Family Medicine and Primary Care Review                                                                                                            | 15     | 3     | LANG: POLISH          |
| Vecchi, 2016                 | Empathy, burnout and... professional competence. Some reflections                                                                                                                       | Empatia, burnout... y competencia profesional. Algunas reflexiones.                                                                                | 114    | 5     | LANG: SPANISH         |



## PREDICTORS OF PHYSICIAN COMPASSION: A SYSTEMATIC REVIEW

| Study (authors)                | title                                                                                                                                                                                                           | journal                                             | volume | issue | REASONS FOR EXCLUSION |
|--------------------------------|-----------------------------------------------------------------------------------------------------------------------------------------------------------------------------------------------------------------|-----------------------------------------------------|--------|-------|-----------------------|
| San-Martin et al., 2017        | Empathy, inter-professional collaboration, and lifelong medical learning in Spanish and Latin-American physicians-in-training who start their postgraduate training in hospitals in Spain. Preliminary outcomes | Atencion Primaria                                   | 49     | 1     | LANG: SPANISH         |
| Delgado-Bolton et al., 2016    | Medical empathy of physicians-in-training who are enrolled in professional training programs. A comparative intercultural study in Spain                                                                        | Atencion Primaria                                   | 48     | 9     | LANG: SPANISH         |
| Huarcaya-Victoria et al., 2019 | Evaluation of the levels of medical empathy in medical residents of a general hospital in Peru                                                                                                                  | Educacion Medica                                    | 20     |       | LANG: SPANISH         |
| MacInnis et al., 2020          | Regarding obesity as a disease is associated with lower weight bias among physicians: A cross-sectional survey study                                                                                            | Stigma and Health                                   | 5      | 1     | MEDIATOR              |
| Zhang, 2019                    | How difficult doctor-patient relationships impair physicians, work engagement: the roles of prosocial motivation and problem-solving pondering                                                                  | Psychological Reports                               |        |       | MEDIATOR              |
| Roze des Ordon et al., 2019    | A pattern language of compassion in intensive care and palliative care contexts                                                                                                                                 | BMC palliative care                                 | 18     | 1     | NO FACTORS            |
| Nelson & Hozak, 2018           | Predictors of caring in the context of relationship-based care                                                                                                                                                  | Creative nursing                                    | 24     | 2     | NO FACTORS            |
| Robieux et al., 2018           | Let's talk about empathy!                                                                                                                                                                                       | Patient education and counseling                    | 101    | 1     | NO FACTORS            |
| Borgstrom & Walter, 2015       | Choice and compassion at the end of life: a critical analysis of recent English policy discourse                                                                                                                | Social science & medicine (1982)                    | 136    |       | NO FACTORS            |
| Back & Arnold, 2014            | "Yes it's sad, but what should I do?" Moving from empathy to action in discussing goals of care                                                                                                                 | Journal of palliative medicine                      | 17     | 2     | NO FACTORS            |
| Wasserman & McNamee, 2010      | Promoting compassionate care with the older people: a relational imperative                                                                                                                                     | International journal of older people nursing       | 5      | 4     | NO FACTORS            |
| Hojat, 2009                    | Ten approaches for enhancing empathy in health and human services cultures                                                                                                                                      | Journal of health and human services administration | 31     | 4     | NO FACTORS            |
| Williams et al., 2008          | Supporting bereaved parents: practical steps in providing compassionate perinatal and neonatal end-of-life care. A North American perspective                                                                   | Seminars in fetal & neonatal medicine               | 13     | 5     | NO FACTORS            |

## PREDICTORS OF PHYSICIAN COMPASSION: A SYSTEMATIC REVIEW

| Study (authors)         | title                                                                                                                                                      | journal                                                                                                   | volume | issue | REASONS FOR EXCLUSION |
|-------------------------|------------------------------------------------------------------------------------------------------------------------------------------------------------|-----------------------------------------------------------------------------------------------------------|--------|-------|-----------------------|
| Halpern, 2007           | Empathy and patient-physician conflicts                                                                                                                    | Journal of general internal medicine                                                                      | 22     | 5     | NO FACTORS            |
| Stevenson, 2002         | Compassion and patient centred care                                                                                                                        | Australian family physician                                                                               | 31     | 12    | NO FACTORS            |
| MacLeod, 2001           | On reflection: doctors learning to care for people who are dying                                                                                           | Social science & medicine (1982)                                                                          | 52     | 11    | NO FACTORS            |
| Hanneman, 1999          | Empathy: a challenge for critical care                                                                                                                     | American journal of critical care : an official publication, American Association of Critical-Care Nurses | 8      | 6     | NO FACTORS            |
| Rosenow, 1999           | The challenge of becoming a distinguished clinician                                                                                                        | Mayo Clinic proceedings                                                                                   | 74     | 6     | NO FACTORS            |
| Yarnold et al., 1993    | Androgyny predicts empathy for trainees in medicine                                                                                                        | Perceptual and motor skills                                                                               | 77     | 2     | NO FACTORS            |
| Zhang, 2020             | How doctors do things with empathy in online medical consultations in china: a discourse-analytic approach                                                 | Health communication                                                                                      |        |       | NO FACTORS            |
| Decety, 2020            | Empathy in medicine                                                                                                                                        | Annales Medico-Psychologiques                                                                             | 178    | 2     | NO FACTORS            |
| Javid et al., 2019      | Caring for women with unanticipated vasa praevia: a qualitative study with Australian midwives and doctors                                                 | Journal of Paediatrics and Child Health                                                                   | 55     |       | NO FACTORS            |
| Hart et al., 2018       | What's behind the white coat: potential mechanisms of physician-attributable variation in critical care                                                    | American Journal of Respiratory and Critical Care Medicine                                                | 197    |       | NO FACTORS            |
| Shahid & Stirling, 2016 | Pediatric and med-peds residents emotional intelligence sub-scores vary by training year                                                                   | Academic Pediatrics                                                                                       | 16     | 6     | NO FACTORS            |
| Sokol, 2013             | Patients we don't like: doctors should not let their moral evaluations of patients affect their treatment                                                  | BMJ (Online)                                                                                              | 346    | 7913  | NO FACTORS            |
| Ring, 2005              | The somatising effect of clinical consultation: What patients and doctors say and do not say when patients present medically unexplained physical symptoms | Social Science and Medicine                                                                               | 61     | 7     | NO FACTORS            |

## PREDICTORS OF PHYSICIAN COMPASSION: A SYSTEMATIC REVIEW

| Study (authors)     | title                                                                                                                           | journal                                                                                                        | volume  | issue | REASONS FOR EXCLUSION |
|---------------------|---------------------------------------------------------------------------------------------------------------------------------|----------------------------------------------------------------------------------------------------------------|---------|-------|-----------------------|
| Rousseau, 2004      | Empathy and compassion: where have they gone?                                                                                   | American Journal of Hospice & Palliative Medicine                                                              | 21      | 5     | NO FACTORS            |
| Rajput, 2018        | Physician empathy levels at Liaquat University Hospital, Hyderabad                                                              | Indo American Journal of Pharmaceutical Sciences                                                               | 5       | 6     | NO FACTORS            |
| Eubank, 2014        | Lessons in compassion and courage start "from the roots"                                                                        |                                                                                                                |         |       | NO FACTORS            |
| Fields et al., 2004 | Comparisons of nurses and physicians on an operational measure of empathy                                                       | Evaluation & the Health Professions                                                                            | 27      | 1     | NO FACTORS            |
| Linn et al., 1987   | Measuring physicians' humanistic attitudes, values, and behaviors                                                               | Medical Care                                                                                                   |         |       | NO FACTORS            |
| Thomas et al., 2019 | Predictors of empathic compassion: do spirituality, religion, and calling matter?                                               | Southern medical journal                                                                                       | 112     | 6     | NO FULL TEXT          |
| Riess, 2016         | Empathy matters: study shows that teaching empathy can improve patient satisfaction                                             | Iowa medicine : journal of the Iowa Medical Society                                                            | 106     | 1     | NO FULL TEXT          |
| Merritt, 2003       | The challenge of clinical empathy                                                                                               | The Journal of clinical ethics                                                                                 | 14      | 4     | NO FULL TEXT          |
| McVay, 2002         | Medicine and spirituality: a simple path to restore compassion in medicine                                                      | South Dakota journal of medicine                                                                               |         |       | NO FULL TEXT          |
| May, 1993           | Institutions and the transformation of personal values. Are the traditional values of caring and service in jeopardy?           | Clinical laboratory management review : official publication of the Clinical Laboratory Management Association | 7       | 3     | NO FULL TEXT          |
| Bossano, 2007       | Empathy and effectiveness: how I developed a deeper understanding and practice in managing depression as a general practitioner | Work Based Learning in Primary Care                                                                            | 5       | 2     | NO FULL TEXT          |
| Balan & Balan, 2018 | Personality disorders: an empathic approach                                                                                     | Big book of emergency department psychiatry: A guide to patient centered operational improvement.              | 245-253 |       | NO FULL TEXT          |
| Rooney, 1991        | Correlates of physician empathy and knowledge of cancer pain management                                                         | Dissertation Abstracts International                                                                           | 51      | 8     | NO FULL TEXT          |

## PREDICTORS OF PHYSICIAN COMPASSION: A SYSTEMATIC REVIEW

| Study (authors)                         | title                                                                                                                                                                                          | journal                                    | volume | issue   | REASONS FOR EXCLUSION   |
|-----------------------------------------|------------------------------------------------------------------------------------------------------------------------------------------------------------------------------------------------|--------------------------------------------|--------|---------|-------------------------|
| Rosenheim, 1973                         | Empathy, identification, altruism, and role similarity in the hospitalized opiate addict and hospital staff                                                                                    | Dissertation Abstracts International       | 34     | 6       | NO FULL TEXT            |
| Sharikh et al., 2020                    | The impact of electronic medical records' functions on the quality of health services                                                                                                          | British Journal of Health Care Management  | 26     | 2       | NO FULL TEXT            |
| Schattner & Schattner, 2011             | Empathy in the patient-physician relationship: Its meaning, impact on patient psychology, satisfaction, compliance, the quality of care and how can empathy in clinical encounters be promoted | Psychology of Empathy                      |        |         | NO FULL TEXT            |
| Pellman, 1980                           | Clinicians and women patients: clinicians' warmth, empathy, and genuineness, attitudes toward women, and demographic characteristics in relation to their clinical judgments of women          |                                            |        | 8022578 | NO FULL TEXT            |
| Scibetta, 1980                          | An exploration of verbal responses and the communication of empathy during videotaped doctor-patient interviews: a descriptive study                                                           | Dissertation Abstracts International       | 41     | 1       | NO FULL TEXT            |
| Heitman, 1992                           | The influence of values and culture in responses to suffering                                                                                                                                  | NLN publications                           |        |         | NO FULL TEXT            |
| Petit, 2004                             | The Compassion Meter: an important diagnostic instrument.                                                                                                                                      | New Zealand Family Practice                |        |         | NO FULL TEXT            |
| McFarland, 2019                         | Less direct patient care delivered by medical trainees by the end of a hematology-oncology ward rotation: association with empathy and related factors                                         | Psycho-oncology                            | 28     | 6       | NOT A CENTRAL CONSTRUCT |
| Brandt et al., 2018                     | Determinants of successful ehealth coaching for consumer lifestyle changes: qualitative interview study among health care professionals                                                        | Journal of medical Internet research       | 20     | 7       | NOT A CENTRAL CONSTRUCT |
| Morice-Ramat, Goronflot & Guihard, 2018 | Are alexithymia and empathy predicting factors of the resilience of medical residents in France?                                                                                               | International journal of medical education | 9      |         | NOT A CENTRAL CONSTRUCT |
| Sansone, 2016                           | Connection and empathy: enhancing pre- and perinatal health care professionals' interpersonal skills                                                                                           | Midwifery today with international midwife |        | 120     | NOT A CENTRAL CONSTRUCT |
| McBride, 2016                           | Family physician support for a family with a mentally ill member                                                                                                                               | Annals of family medicine                  | 14     | 5       | NOT A CENTRAL CONSTRUCT |

## PREDICTORS OF PHYSICIAN COMPASSION: A SYSTEMATIC REVIEW

| Study (authors)            | title                                                                                                                                                             | journal                                                                         | volume | issue | REASONS FOR EXCLUSION   |
|----------------------------|-------------------------------------------------------------------------------------------------------------------------------------------------------------------|---------------------------------------------------------------------------------|--------|-------|-------------------------|
| Oster et al., 2016         | Kikiskawawasow - prenatal healthcare provider perceptions of effective care for First Nations women: an ethnographic community-based participatory research study | BMC pregnancy and childbirth                                                    | 16     | 1     | NOT A CENTRAL CONSTRUCT |
| Wiklund et al., 2015       | Staff experiences of caring for patients with extended-spectrum beta-lactamase-producing bacteria: a qualitative study                                            | American journal of infection control                                           | 43     | 12    | NOT A CENTRAL CONSTRUCT |
| Fernando & Consedine, 2014 | Development and initial psychometric properties of the Barriers to Physician Compassion questionnaire                                                             | Postgraduate medical journal                                                    | 90     | 1065  | NOT A CENTRAL CONSTRUCT |
| Stone, 2014                | Blame, shame and hopelessness: medically unexplained symptoms and the 'heartsink' experience                                                                      | Australian family physician                                                     | 43     | 4     | NOT A CENTRAL CONSTRUCT |
| French, 2013               | Substance abuse in pregnancy: compassionate and competent care for the patient in labor                                                                           | Clinical obstetrics and gynecology                                              | 56     | 1     | NOT A CENTRAL CONSTRUCT |
| Hill, 2013                 | Perinatal addiction: providing compassionate and competent care                                                                                                   | Clinical obstetrics and gynecology                                              | 56     | 1     | NOT A CENTRAL CONSTRUCT |
| Austin, 2012               | Moral distress and the contemporary plight of health professionals                                                                                                | HEC forum : an interdisciplinary journal on hospitals' ethical and legal issues | 24     | 1     | NOT A CENTRAL CONSTRUCT |
| Holler & Scalzo, 2012      | "I've heard some things that scare me". Responding with empathy to parents' fears of vaccinations                                                                 | Missouri medicine                                                               | 109    | 1     | NOT A CENTRAL CONSTRUCT |
| Protiere et al., 2010      | Prescribers' attitudes toward elderly breast cancer patients. Discrimination or empathy?                                                                          | Critical reviews in oncology/hematology                                         | 75     | 2     | NOT A CENTRAL CONSTRUCT |
| Klitzman, 2006             | Improving education on doctor-patient relationships and communication: lessons from doctors who become patients                                                   | Academic medicine : journal of the Association of American Medical Colleges     | 81     | 5     | NOT A CENTRAL CONSTRUCT |
| Graber & Mitcham, 2004     | Compassionate clinicians: take patient care beyond the ordinary                                                                                                   | Holistic nursing practice                                                       | 18     | 2     | NOT A CENTRAL CONSTRUCT |
| Halpern, 2003              | Practicing medicine in the real world: challenges to empathy and respect for patients                                                                             | The Journal of clinical ethics                                                  | 14     | 4     | NOT A CENTRAL CONSTRUCT |

## PREDICTORS OF PHYSICIAN COMPASSION: A SYSTEMATIC REVIEW

| Study (authors)                         | title                                                                                                                | journal                                                  | volume | issue | REASONS FOR EXCLUSION   |
|-----------------------------------------|----------------------------------------------------------------------------------------------------------------------|----------------------------------------------------------|--------|-------|-------------------------|
| Gallagher, 1999                         | The era of managed care: the struggle of cost containment and compassionate, effective care of persons with HIV/AIDS | The Nursing clinics of North America                     | 34     | 1     | NOT A CENTRAL CONSTRUCT |
| Dreisinger & Soorma, 2020               | Confronting subconscious bias: ethics in the pediatric emergency department                                          | Pediatric Emergency Care                                 | 36     | 2     | NOT A CENTRAL CONSTRUCT |
| Mohiuddin, 2019                         | Patient-provider relationship: compliance with care                                                                  | Research Journal of Medical Sciences                     | 13     | 2     | NOT A CENTRAL CONSTRUCT |
| Fearon et al., 2019                     | Pediatric residents' perceived barriers to opioid use in sickle cell disease pain management                         | Pediatric Blood and Cancer                               | 66     | 2     | NOT A CENTRAL CONSTRUCT |
| Elliott, Bennett & Wolfson-Stofko, 2109 | Life after opioid-involved overdose: survivor narratives and their implications for ER/ED interventions              | Addiction (Abingdon, England)                            | 114    | 8     | NOT A CENTRAL CONSTRUCT |
| Conway-Hicks & de Groot, 2019           | Living in two worlds: becoming and being a doctor among those who identify with "not from an advantaged background"  | Current Problems in Pediatric and Adolescent Health Care | 49     | 4     | NOT A CENTRAL CONSTRUCT |
| Naseem, 2018                            | "Breaking breast cancer news" with ethnic minority: A UK experience                                                  | Journal of Multidisciplinary Healthcare                  | 11     |       | NOT A CENTRAL CONSTRUCT |
| Marini, 2015                            | Re-tooling critical care to become a better intensivist: something old and something new                             | Critical Care                                            | 19     |       | NOT A CENTRAL CONSTRUCT |
| Sigsbee & Bernat, 2014                  | Physician burnout: A neurologic crisis                                                                               | Neurology                                                | 83     | 24    | NOT A CENTRAL CONSTRUCT |
| Griffiths et al., 2014                  | Preparation to care for confused older patients in general hospitals: a study of UK health professionals             | Age and Ageing                                           | 43     | 4     | NOT A CENTRAL CONSTRUCT |
| Anonymous                               | Medicine and mental illness: How can the obstacles sick doctors face be overcome?                                    | Psychiatrist                                             | 36     | 3     | NOT A CENTRAL CONSTRUCT |
| Wohlgemuth, Auerbach & Parker, 2010     | Geriatrics health care providers as family caregivers                                                                | Journal of the American Geriatrics Society               | 58     |       | NOT A CENTRAL CONSTRUCT |
| Consoli et al., 2010                    | Physicians' degree of motivation regarding their perception of hypertension, and blood pressure control              | Journal of Hypertension                                  | 28     | 6     | NOT A CENTRAL CONSTRUCT |
| Strous, Ulman & Kotler, 2006            | The hateful patient revisited: Relevance for 21st century medicine                                                   | European Journal of Internal Medicine                    | 17     | 6     | NOT A CENTRAL CONSTRUCT |
| Hankir & Zaman, 2013                    | The 'melodies of manic-depressive illness' a case study of bipolar disorder: Jung's archetype 'the                   | Bipolar Disorders                                        | 15     |       | NOT A CENTRAL CONSTRUCT |

## PREDICTORS OF PHYSICIAN COMPASSION: A SYSTEMATIC REVIEW

| Study (authors)          | title                                                                                                                                                                  | journal                                               | volume | issue   | REASONS FOR EXCLUSION   |
|--------------------------|------------------------------------------------------------------------------------------------------------------------------------------------------------------------|-------------------------------------------------------|--------|---------|-------------------------|
|                          | wounder healer', autobiographical narrative and psychopathology and bipolar disorder amongst the medical profession                                                    |                                                       |        |         |                         |
| Fiscella & Epstein, 2008 | So much to do, so little time: care for the socially disadvantaged and the 15-minute visit                                                                             | Archives of Internal Medicine                         | 168    | 17      | NOT A CENTRAL CONSTRUCT |
| Stubbe, 2017             | Optimizing empathy: physician self-care as a crucial component of trauma-informed treatment                                                                            | Focus: The Journal of Lifelong Learning in Psychiatry | 15     | 4       | NOT A CENTRAL CONSTRUCT |
| Krupa, 2011              | When doctors and patients have the same disease                                                                                                                        | Am Med News                                           | 54     | 29      | NOT A CENTRAL CONSTRUCT |
| Zhou & Fischer, 2018     | Mimicking non-verbal emotional expressions and empathy development in simulated consultations: An experimental feasibility study                                       | Patient education and counseling                      | 101    | 2       | PATIENT PERCEPTIONS     |
| Brook, 2010              | A physician's experience as a cancer of the neck patient                                                                                                               | Surgical oncology                                     | 19     | 4       | PATIENT PERCEPTIONS     |
| Freedman, 2003           | Prescriptions for health providers: from cancer patients                                                                                                               | Cancer nursing                                        | 26     | 4       | PATIENT PERCEPTIONS     |
| Simoes, 2019             | Communication and health: doctor-patient relationship in patients with multimorbidity, an exploratory study                                                            | Family Medicine and Primary Care Review               | 21     | 4       | PATIENT PERCEPTIONS     |
| Zilliachus et al., 2011  | Telegenetics for hereditary breast/ovarian cancer                                                                                                                      | Familial Cancer                                       | 10     |         | PATIENT PERCEPTIONS     |
| Adams, & Knott, 2013     | A mixed-method analysis examining the effect of bedside computing on physician and nurse compassion in three hospital domains: medical-surgical, stroke, and maternity |                                                       |        |         | PATIENT PERCEPTIONS     |
| Fraenkel, 1986           | The ins and outs of medical encounters: an interactional analysis of empathy, patient satisfaction, and information exchange (doctor-patient, nonverbal communication) |                                                       |        | 8615281 | PATIENT PERCEPTIONS     |
| Yuguro et al., 2017      | Occupational burnout and empathy influence blood pressure control in primary care physicians                                                                           | BMC family practice                                   | 18     | 1       | PREDICTOR               |
| Schafer et al., 2016     | Health care providers' judgments in chronic pain: the influence of gender and trustworthiness                                                                          | Pain                                                  | 157    | 8       | PREDICTOR               |

## PREDICTORS OF PHYSICIAN COMPASSION: A SYSTEMATIC REVIEW

| Study (authors)                          | title                                                                                                                                                           | journal                                                                                             | volume | issue | REASONS FOR EXCLUSION                        |
|------------------------------------------|-----------------------------------------------------------------------------------------------------------------------------------------------------------------|-----------------------------------------------------------------------------------------------------|--------|-------|----------------------------------------------|
| Mercer & Howie, 2006                     | CQI-2--a new measure of holistic interpersonal care in primary care consultations                                                                               | The British journal of general practice : the journal of the Royal College of General Practitioners | 56     | 525   | PREDICTOR                                    |
| Cohen et al., 1996                       | Interest in different types of patients. What factors influence new-to-practice family physicians?                                                              | Canadian family physician Medecin de famille canadien                                               | 42     |       | PREDICTOR                                    |
| Jensen et al., 2020                      | Reward and empathy in the treating clinician: the neural correlates of successful doctor-patient interactions                                                   | Translational Psychiatry                                                                            | 10     | 1     | PREDICTOR                                    |
| Pedersen et al., 2019                    | Patient-physician relationship and use of gut feeling in cancer diagnosis in primary care: a cross-sectional survey of patients and their general practitioners | BMJ Open                                                                                            | 9      | 7     | PREDICTOR                                    |
| Down et al., 2019                        | Physician experiences when discussing the need for additional oral medication with type 2 diabetes patients: Insights from the cross-national IntroDia study    | Diabetes Research and Clinical Practice                                                             | 148    |       | PREDICTOR                                    |
| Lopez-Garcia et al., 2018                | User violence and psychological well-being in primary health-care professionals                                                                                 | The European Journal of Psychology Applied to Legal Context                                         | 10     | 2     | PREDICTOR                                    |
| Soler-Gonzalez et al., 2017              | Human connections and their roles in the occupational well-being of healthcare professionals: A study on loneliness and empathy                                 | Frontiers in Psychology                                                                             |        |       | PREDICTOR                                    |
| Shanafelt et al., 2002                   | Burnout and self reported patient-care in an internal medicine residency program.                                                                               | Annals of Internal Medicine                                                                         |        |       | PREDICTOR                                    |
| Ratanawongsa et al., 2016                | Changes in clinician-patient communication with safety net EHR implementation                                                                                   | Journal of General Internal Medicine                                                                | 31     | 2     | WRONG CONSTRUCT: AFFECTIVE TONE              |
| Kusalaruk, Saipanish & Hiranyatheb, 2015 | Attitudes of psychiatrists toward obsessive-compulsive disorder patients                                                                                        | Neuropsychiatric Disease and Treatment                                                              | 11     |       | WRONG CONSTRUCT: ANNOYANCE, ADMIRATION, PITY |
| Robinson, 1998                           | People with HIV/AIDS: who cares?                                                                                                                                | Journal of advanced nursing                                                                         | 28     | 4     | WRONG CONSTRUCT: ATTITUDES TOWARDS CARING    |



## PREDICTORS OF PHYSICIAN COMPASSION: A SYSTEMATIC REVIEW

| Study (authors)              | title                                                                                                                                                   | journal                                                                                                          | volume | issue | REASONS FOR EXCLUSION                    |
|------------------------------|---------------------------------------------------------------------------------------------------------------------------------------------------------|------------------------------------------------------------------------------------------------------------------|--------|-------|------------------------------------------|
| Avny & Alon, 2016            | Practicing death                                                                                                                                        | Patient Education and Counseling                                                                                 | 99     | 7     | WRONG CONSTRUCT: AUTHENTICITY            |
| Fernando & Consedine, 2017   | Barriers to medical compassion as a function of experience and specialization: psychiatry, pediatrics, internal medicine, surgery, and general practice | Journal of pain and symptom management                                                                           | 53     | 6     | WRONG CONSTRUCT: BARRIERS TO COMPASSION  |
| Allen & Oberle, 1996         | Augmentation mammoplasty: a complex choice                                                                                                              | Health care for women international                                                                              | 17     | 1     | WRONG CONSTRUCT: BEAUTY                  |
| Epstein, 2014                | Realizing Engel's biopsychosocial vision: resilience, compassion, and quality of care                                                                   | International journal of psychiatry in medicine                                                                  | 47     | 4     | WRONG CONSTRUCT: BIOPSYCHOSOCIAL CARE    |
| Pergert et al., 2008         | Bridging obstacles to transcultural caring relationships-Tools discovered through interviews with staff in pediatric oncology care                      | European Journal of Oncology Nursing                                                                             | 12     | 1     | WRONG CONSTRUCT: BRIDGING                |
| Shanafelt, 2009              | Enhancing meaning in work: a prescription for preventing physician burnout and promoting patient-centered care                                          | JAMA                                                                                                             | 302    | 12    | WRONG CONSTRUCT: BURNOUT                 |
| Barnsley et al., 1999        | Physician characteristics and the physician-patient relationship. Impact of sex, year of graduation, and specialty                                      | Canadian family physician<br>Medecin de famille<br>canadien                                                      | 45     |       | WRONG CONSTRUCT: COMMUNICATION           |
| Holmes et al., 2020          | Personality predictors of communication skills among orthopedic surgery residents                                                                       | Journal of Surgical Education                                                                                    | 77     | 1     | WRONG CONSTRUCT: COMMUNICATION           |
| Back, Deignan & Potter, 2014 | Compassion, compassion fatigue, and burnout: key insights for oncology professionals                                                                    | American Society of Clinical Oncology educational book.<br>American Society of Clinical Oncology. Annual Meeting |        |       | WRONG CONSTRUCT: COMPASSION FATIGUE      |
| Dasan et al., 2015           | Prevalence, causes and consequences of compassion satisfaction and compassion fatigue in emergency care: a mixed-methods study of UK NHS Consultants    | Emergency medicine journal : EMJ                                                                                 | 32     | 8     | WRONG CONSTRUCT: COMPASSION SATISFACTION |
| Sanchez-Reilly et al., 2013  | Caring for oneself to care for others: physicians and their self-care                                                                                   | The journal of supportive oncology                                                                               | 11     | 2     | WRONG CONSTRUCT: COMPASSION SATISFACTION |

## PREDICTORS OF PHYSICIAN COMPASSION: A SYSTEMATIC REVIEW

| Study (authors)                | title                                                                                                                                                                   | journal                                                                                                   | volume | issue | REASONS FOR EXCLUSION                         |
|--------------------------------|-------------------------------------------------------------------------------------------------------------------------------------------------------------------------|-----------------------------------------------------------------------------------------------------------|--------|-------|-----------------------------------------------|
| Abrishami, 2018                | The need for cultural competency in health care                                                                                                                         | Radiologic Technology                                                                                     | 89     | 5     | WRONG CONSTRUCT: CULTURAL COMPETENCE          |
| Berk, 2009                     | Derogatory and cynical humour in clinical teaching and the workplace: the need for professionalism.                                                                     | Medical Education                                                                                         |        |       | WRONG CONSTRUCT: CYNICAL HUMOR                |
| Arunogiri, Frei & Lubman, 2015 | Persistent noncancer pain in patients with addiction: reflecting on the challenges                                                                                      | Medicine Today                                                                                            | 16     | 6     | WRONG CONSTRUCT: D-P RELATIONSHIPS            |
| Breen & Greenberg, 2010        | Difficult physician-patient encounters                                                                                                                                  | Intern Med J                                                                                              | 40     | 10    | WRONG CONSTRUCT: DIFFICULT ENCOUNTERS         |
| Breen & Greenberg, 2010        | Ethics in medicine - A clinical perspective: Difficult physician-patient encounters                                                                                     | Internal Medicine Journal                                                                                 | 40     | 10    | WRONG CONSTRUCT: DIFFICULT PATIENT ENCOUNTERS |
| Park et al., 2019              | Racial disparities in clinician responses to patients' emotional concerns                                                                                               | Journal of General Internal Medicine                                                                      | 34     | 2     | WRONG CONSTRUCT: EMOTIONAL EXPRESSIONS        |
| Libert et al., 2006            | Does psychological characteristic influence physicians' communication styles? Impact of physicians' locus of control on interviews with a cancer patient and a relative | Supportive Care in Cancer                                                                                 | 14     | 3     | WRONG CONSTRUCT: EMPATHY+REASSURANCE          |
| Riley et al., 2014             | Traditional/restrictive vs patient-centered intensive care unit visitation: perceptions of patients' family members, physicians, and nurses                             | American journal of critical care : an official publication, American Association of Critical-Care Nurses | 23     | 4     | WRONG CONSTRUCT: MEDICAL CARING               |
| Price, 2013                    | Caring and technology in an intensive care unit: an ethnographic study                                                                                                  | Nursing in critical care                                                                                  | 18     | 6     | WRONG CONSTRUCT: MEDICAL CARING               |
| Warren et al., 2013            | Treatment providers with a personal history of eating pathology: a qualitative examination of common experiences                                                        | Eating disorders                                                                                          | 21     | 4     | WRONG CONSTRUCT: MEDICAL CARING               |
| Clowse et al., 2019            | Provider perceptions on the management of lupus during pregnancy: barriers to improved care                                                                             | Lupus Science and Medicine                                                                                | 6      |       | WRONG CONSTRUCT: MEDICAL CARING               |
| Trimbur, Quill & Norton, 2013  | Perspectives on suffering in the primary care setting                                                                                                                   | Journal of General Internal Medicine                                                                      | 28     |       | WRONG CONSTRUCT: MEDICAL CARING               |

## PREDICTORS OF PHYSICIAN COMPASSION: A SYSTEMATIC REVIEW

| Study (authors)                | title                                                                                                                      | journal                                               | volume | issue | REASONS FOR EXCLUSION                               |
|--------------------------------|----------------------------------------------------------------------------------------------------------------------------|-------------------------------------------------------|--------|-------|-----------------------------------------------------|
| Fazzone, 1991                  | Caring for abused and neglected children on inpatient child psychiatric units: a cross-sectional ethnography               |                                                       |        |       | WRONG CONSTRUCT: MEDICAL CARING                     |
| Epstein, 1999                  | Mindful practice                                                                                                           | Journal of the American Medical Association           | 282    | 9     | WRONG CONSTRUCT: MINDFULNESS                        |
| Trotter, 2002                  | Virtue, foible, and practice--medicine's arduous moral triad                                                               | Bioethics forum                                       | 18     | 1     | WRONG CONSTRUCT: MORAL FOIBLES                      |
| Hawes & Willegal, 2017         | Responsible compassionate care: meeting the needs of patients with a history of intravenous drug abuse                     | JAVA - Journal of the Association for Vascular Access | 22     | 1     | WRONG CONSTRUCT: PATIENT MANAGEMENT                 |
| Lochman & Dain, 1982           | Behavioral context of perceived physician empathy                                                                          | Family Practice Research Journal                      | 2      | 1     | WRONG CONSTRUCT: PERCEIVED EMPATHY                  |
| Hunter-Adams & Battersby, 2020 | Health care providers' perspectives of diet-related non-communicable disease in South Africa                               | BMC public health                                     | 20     | 1     | WRONG CONSTRUCT: PERCEPTIONS OF PATIENTS            |
| Bras et al., 2012              | Psychiatrists' empathy, beliefs and attitudes towards veterans suffering from combat-related posttraumatic stress disorder | Psychiatria Danubina                                  | 24     | 3     | WRONG CONSTRUCT: SEPARATE COMPASSION ITEMS ANALYSIS |
| Revenson, 1989                 | Compassionate stereotyping of elderly patients by physicians: revising the social contact hypothesis                       | Psychology and aging                                  | 4      | 2     | WRONG CONSTRUCT: STEREOTYPING                       |
| Betsch et al., 2017            | What's in a name? Health care providers' perceptions of pediatric pain patients based on diagnostic labels                 | The Clinical journal of pain                          | 33     | 8     | WRONG CONSTRUCT: SYMPATHY                           |
| Herr, Hanna & Restauri, 2018   | Cultivating physician character in diagnostic radiology through virtuous caring and collaborative professionalism          | Academic radiology                                    | 25     | 11    | WRONG CONSTRUCT: VIRTUOUSNESS                       |
| Kumar, 2017                    | My child, my patient                                                                                                       | Pediatric critical care medicine                      | 18     | 8     | WRONG PUBLICATION TYPE                              |
| Austen, 2016                   | Increasing emotional support for healthcare workers can rebalance clinical detachment and empathy                          | The British journal of general practice               | 66     | 648   | WRONG PUBLICATION TYPE                              |
| Maxwell, 2017                  | Compassionate care: constitution, culture or coping?                                                                       | BMJ Quality & Safety                                  | 26     | 12    | WRONG PUBLICATION TYPE                              |

## PREDICTORS OF PHYSICIAN COMPASSION: A SYSTEMATIC REVIEW

| Study (authors)                                                          | title                                                                                         | journal                                                                                             | volume | issue | REASONS FOR EXCLUSION  |
|--------------------------------------------------------------------------|-----------------------------------------------------------------------------------------------|-----------------------------------------------------------------------------------------------------|--------|-------|------------------------|
| Fernando et al., 2016                                                    | Enhancing compassion in general practice: it's not all about the doctor                       | The British journal of general practice : the journal of the Royal College of General Practitioners | 66     | 648   | WRONG PUBLICATION TYPE |
| Newdick & Danbury, 2015                                                  | Culture, compassion and clinical neglect: probity in the NHS after Mid Staffordshire          | Journal of medical ethics                                                                           | 41     | 12    | WRONG PUBLICATION TYPE |
| Ratzan, 2014                                                             | "Lives there who loves his pain?": empathy, creativity, and the physician's obligation        | The Hastings Center report                                                                          | 44     | 1     | WRONG PUBLICATION TYPE |
| Frampton, Guastello & Lepore, 2013                                       | Compassion as the foundation of patient-centered care: the importance of compassion in action | Journal of comparative effectiveness research                                                       | 2      | 5     | WRONG PUBLICATION TYPE |
| Cargill, 2011                                                            | Compassion in the storm. a doctor breaks down barriers one patient at a time                  | Positively aware : the monthly journal of the Test Positive Aware Network                           | 23     | 4     | WRONG PUBLICATION TYPE |
| American College of, Obstetricians and Gynecologists Committee on Ethics | Committee Opinion No. 480: Empathy in women's health care                                     | Obstetrics and gynecology                                                                           | 117    | 3     | WRONG PUBLICATION TYPE |
| Crandall & Marion, 2009                                                  | Commentary: Identifying attitudes towards empathy: an essential feature of professionalism    | Academic medicine : journal of the Association of American Medical Colleges                         | 84     | 9     | WRONG PUBLICATION TYPE |
| Higginson, 2009                                                          | Perspective: limiting resident work hours is a moral concern                                  | Academic medicine : journal of the Association of American Medical Colleges                         | 84     | 3     | WRONG PUBLICATION TYPE |
| Taylor, 1997                                                             | Compassion: its neglect and importance                                                        | The British journal of general practice : the journal of the Royal College of General Practitioners | 47     | 421   | WRONG PUBLICATION TYPE |
| Carnevale, 1993                                                          | Can critical care be delivered humanely?                                                      | Leadership in health services = Leadership dans les services de sante                               | 2      | 2     | WRONG PUBLICATION TYPE |

## PREDICTORS OF PHYSICIAN COMPASSION: A SYSTEMATIC REVIEW

| Study (authors)               | title                                                                                                                                                                          | journal                                                      | volume  | issue | REASONS FOR EXCLUSION  |
|-------------------------------|--------------------------------------------------------------------------------------------------------------------------------------------------------------------------------|--------------------------------------------------------------|---------|-------|------------------------|
| Liben, 2011                   | Empathy, compassion, and the goals of medicine                                                                                                                                 | Whole person care: A new paradigm for the 21st century.      | 59-67   |       | WRONG PUBLICATION TYPE |
| Gallagher, 2006               | Empathy: A Timeless Skill for the Pain Medicine Toolbox                                                                                                                        | Pain Medicine                                                | 7       | 3     | WRONG PUBLICATION TYPE |
| Huggard, 2003                 | Compassion fatigue: How much can I give?                                                                                                                                       | Medical Education                                            | 37      | 2     | WRONG PUBLICATION TYPE |
| Stoller, 1984                 | Psychiatry's mind-brain dialectic, or the Mona Lisa has no eyebrows                                                                                                            | The American Journal of Psychiatry                           | 141     | 4     | WRONG PUBLICATION TYPE |
| Howick & Rees, 2017           | Overthrowing barriers to empathy in healthcare: empathy in the age of the Internet                                                                                             | Journal of the Royal Society of Medicine                     | 110     | 9     | WRONG PUBLICATION TYPE |
| Coulehan, 2012                | To suffer with: The poetry of compassion                                                                                                                                       | Perspectives on Human Suffering                              | 227-244 |       | WRONG PUBLICATION TYPE |
| Khanuja et al., 2011          | Empathy and sympathy in the medical profession: Should we stop the desertion?                                                                                                  | Pravara Medical Review                                       | 6       | 3     | WRONG PUBLICATION TYPE |
| Gabriel, 2015                 | Beyond compassion: replacing a blame culture with proper emotional support and management comment on "why and how is compassion necessary to provide good quality healthcare?" | International Journal of Health Policy and Management        | 4       | 9     | WRONG PUBLICATION TYPE |
| Bivins, Tierney & Seers, 2017 | Compassionate care: not easy, not free, not only nurses                                                                                                                        | BMJ Quality & Safety                                         | 26      | 12    | WRONG PUBLICATION TYPE |
| Smyth, 2015                   | Support is vital for staff to deliver compassionate care                                                                                                                       | Cancer Nursing Practice                                      | 14      | 9     | WRONG PUBLICATION TYPE |
| Shaw, 2017                    | Review: Healthcare workers' perceptions of organisational culture and the impact on the delivery of compassionate quality care                                                 | J Res Nurs                                                   | 22      | 1     | WRONG PUBLICATION TYPE |
| Dougherty & Purtilo, 1995.    | Physicians' duty of compassion                                                                                                                                                 | Cambridge Quarterly of Healthcare Ethics                     | 4       | 4     | WRONG PUBLICATION TYPE |
| Ekstrom, 2018                 | Compassion in medicine                                                                                                                                                         | The moral psychology of compassion.                          | 113-128 |       | WRONG PUBLICATION TYPE |
| Egener, 2014                  | Empathy                                                                                                                                                                        | Behavioral medicine: A guide for clinical practice., 4th ed. | 13-20   |       | WRONG PUBLICATION TYPE |

## PREDICTORS OF PHYSICIAN COMPASSION: A SYSTEMATIC REVIEW

| Study (authors)           | title                                                                                                                                                                  | journal                                                                                    | volume | issue | REASONS FOR EXCLUSION        |
|---------------------------|------------------------------------------------------------------------------------------------------------------------------------------------------------------------|--------------------------------------------------------------------------------------------|--------|-------|------------------------------|
| Newton, 2013              | Walking a fine line: Is it possible to remain an empathic physician and have a hardened heart?                                                                         | Frontiers in Human Neuroscience                                                            |        |       | WRONG PUBLICATION TYPE: BOOK |
| Collins, 2002             | A doctor's reflections on empathy                                                                                                                                      | Dimensions of empathic therapy.                                                            |        |       | WRONG PUBLICATION TYPE: BOOK |
| Egener, 1997              | Empathy                                                                                                                                                                | Behavioral medicine in primary care: A practical guide.                                    |        |       | WRONG PUBLICATION TYPE: BOOK |
| Spiro, 1996               | Empathy: an introduction                                                                                                                                               | Empathy and the practice of medicine: Beyond pills and the scalpel.                        |        |       | WRONG PUBLICATION TYPE: BOOK |
| Sonnenberg, 1996          | The problems of listening                                                                                                                                              | Emotional aftermath of the Persian Gulf War: Veterans, families, communities, and nations. |        |       | WRONG PUBLICATION TYPE: BOOK |
| Reiser, 1996              | Science, pedagogy, and the transformation of empathy in medicine                                                                                                       | Empathy and the practice of medicine: Beyond pills and the scalpel.                        |        |       | WRONG PUBLICATION TYPE: BOOK |
| Peschel & Peschel, 1996   | Selective empathy                                                                                                                                                      | Empathy and the practice of medicine: Beyond pills and the scalpel.                        |        |       | WRONG PUBLICATION TYPE: BOOK |
| Mathiasen & Alpert, J1996 | Lessons in empathy: literature, art, and medicine                                                                                                                      | Empathy and the practice of medicine: Beyond pills and the scalpel.                        |        |       | WRONG PUBLICATION TYPE: BOOK |
| Glick, 1996               | The empathic physician: nature and nurture                                                                                                                             | Empathy and the practice of medicine: Beyond pills and the scalpel.                        |        |       | WRONG PUBLICATION TYPE: BOOK |
| Rosenstein, 2018          | Improving patient care by helping physicians adjust to the stress and pressures of today's health care environment: the importance of compassionate care relationships | Advances in Health and Disease                                                             |        |       | WRONG PUBLICATION TYPE: BOOK |
| Kerasidou & Horn, 2018    | Empathy in healthcare: the limits and scope of empathy in public and private systems                                                                                   | Marketisation, Ethics and Healthcare: Policy, Practice and Moral Formation                 |        |       | WRONG PUBLICATION TYPE: BOOK |

## PREDICTORS OF PHYSICIAN COMPASSION: A SYSTEMATIC REVIEW

| Study (authors)               | title                                                                                                                                                        | journal                                                                      | volume                               | issue | REASONS FOR EXCLUSION                       |
|-------------------------------|--------------------------------------------------------------------------------------------------------------------------------------------------------------|------------------------------------------------------------------------------|--------------------------------------|-------|---------------------------------------------|
| Shea, Wynyard & Lionis, 2014  | Providing compassionate healthcare: challenges in policy and practice                                                                                        | Providing Compassionate Healthcare: Challenges in Policy and Practice        | WRONG PUBLICATION TYPE: BOOK         |       |                                             |
| Pembroke, 2011                | Psychology of empathy in a medical context                                                                                                                   | Psychology of Empathy                                                        | WRONG PUBLICATION TYPE: BOOK         |       |                                             |
| Hojat, 2007                   | Empathy in patient care: antecedents, development, measurement, and outcomes                                                                                 | Empathy in Patient Care: Antecedents, Development, Measurement, and Outcomes | WRONG PUBLICATION TYPE: BOOK         |       |                                             |
| Chen, 2007                    | Departing lessons (book excerpt: Final Exam)                                                                                                                 | Am Med News                                                                  | WRONG PUBLICATION TYPE: BOOK         |       |                                             |
| Muraszko, 1987                | Neurosurgical residency training: lessons in humanism                                                                                                        | Acute, chronic, and terminal care in neurosurgery.                           | WRONG PUBLICATION TYPE: BOOK         |       |                                             |
| Rubin, 2013                   | Professional conduct and misconduct                                                                                                                          | Handbook of clinical neurology                                               | 118                                  |       | WRONG PUBLICATION TYPE: BOOK CHAPTER        |
| Graber & Mitcham, 2008        | Compassionate clinicians: exemplary care in hospital settings                                                                                                | The science of compassionate love: Theory, research, and applications.       | WRONG PUBLICATION TYPE: BOOK CHAPTER |       |                                             |
| Anandarajah et al., 2009      | Resident physicians' thoughts regarding compassion and spirituality in the doctor-patient relationship: a brief report                                       | Rhode Island medical journal (2013)                                          | WRONG PUBLICATION TYPE: BOOK CHAPTER |       |                                             |
| Dossett, 2011                 | Professionalism and factors associated with burnout, empathy, and resilience among early career physicians: results of the heart alumni survey               | Journal of General Internal Medicine                                         | 26                                   |       | WRONG PUBLICATION TYPE: CONFERENCE ABSTRACT |
| Uhelski, Panda & Qayyum, 2019 | Relationship between burnout, spirituality, and empathy among physicians                                                                                     | Journal of General Internal Medicine                                         | 34                                   | 2     |                                             |
| Mc Farland & Komisar, 2019    | Is empathy associated with a derived sense of meaning among resident physicians working with patients nearing the end of life on a hematology-oncology ward? | Journal of Clinical Oncology                                                 | 34                                   | 26    | WRONG PUBLICATION TYPE: CONFERENCE ABSTRACT |

## PREDICTORS OF PHYSICIAN COMPASSION: A SYSTEMATIC REVIEW

| Study (authors)                    | title                                                                                                                                                                                         | journal                                    | volume | issue | REASONS FOR EXCLUSION                       |
|------------------------------------|-----------------------------------------------------------------------------------------------------------------------------------------------------------------------------------------------|--------------------------------------------|--------|-------|---------------------------------------------|
| Lazar & Bolle, 2019                | "Transparent Pain": How society deals with fibromyalgia beliefs, opinions and views of health professionals on patients with chronic pain                                                     | Clinical and Experimental Rheumatology     | 37     | 1     | WRONG PUBLICATION TYPE: CONFERENCE ABSTRACT |
| Kasam, 2019                        | Emotional intelligence and empathy among medical undergraduates, interns, postgraduates and medical practitioners                                                                             | Indian Journal of Psychiatry               | 61     | 9     | WRONG PUBLICATION TYPE: CONFERENCE ABSTRACT |
| Kandratsenia, 2019                 | Social stigma towards people with mental disorders among the psychiatrists, general practitioners and young doctors(interns)                                                                  | European Neuropsychopharmacology           | 29     |       | WRONG PUBLICATION TYPE: CONFERENCE ABSTRACT |
| Alcorta-Garza, 2019                | Detection of the burnout syndrome, empathy, and psychosocial profile of the health team of the oncology service, UANL University Center Against Cancer (CUCC)                                 | Journal of Clinical Oncology               | 37     |       | WRONG PUBLICATION TYPE: CONFERENCE ABSTRACT |
| Stepien, 2018                      | Vulnerability and compassion: sources of joy in medicine                                                                                                                                      | Pediatrics                                 | 142    | 1     | WRONG PUBLICATION TYPE: CONFERENCE ABSTRACT |
| Sinclair et al., 2018              | Compassion in the margins: the perspectives, experiences, challenges and facilitators of compassion according to long term care patients, their family members and their healthcare providers | Palliative Medicine                        | 32     | 1     | WRONG PUBLICATION TYPE: CONFERENCE ABSTRACT |
| Sinclair et al., 2018              | Compassion without borders: Palliative care providers' perspectives on challenges and facilitators to compassion                                                                              | Palliative Medicine                        | 32     | 1     | WRONG PUBLICATION TYPE: CONFERENCE ABSTRACT |
| Rawal, Nimmon & Strahlendorf, 2018 | Exploring empathy in pediatrics residents at an urban children's hospital in Canada                                                                                                           | Paediatrics and Child Health (Canada)      | 23     |       | WRONG PUBLICATION TYPE: CONFERENCE ABSTRACT |
| Plews-Ogan, 2018                   | Compassion and connectedness as motivational drivers in the care of children with medical complexity                                                                                          | Developmental Medicine and Child Neurology | 60     |       | WRONG PUBLICATION TYPE: CONFERENCE ABSTRACT |
| Maina, 2018                        | A systematic review of implicit racial bias in healthcare                                                                                                                                     | Pediatrics                                 | 141    | 1     | WRONG PUBLICATION TYPE: CONFERENCE ABSTRACT |



## PREDICTORS OF PHYSICIAN COMPASSION: A SYSTEMATIC REVIEW

| <b>Study (authors)</b>             | <b>title</b>                                                                                                             | <b>journal</b>                                    | <b>volume</b> | <b>issue</b> | <b>REASONS FOR EXCLUSION</b>                |
|------------------------------------|--------------------------------------------------------------------------------------------------------------------------|---------------------------------------------------|---------------|--------------|---------------------------------------------|
| Lauden et al., 2018                | Burnout and who's who in pediatric global health: A look at national trends                                              | American Journal of Tropical Medicine and Hygiene | 99            | 4            | WRONG PUBLICATION TYPE: CONFERENCE ABSTRACT |
| Kim, 2018                          | The power of vulnerability                                                                                               | Australian and New Zealand Journal of Psychiatry  | 52            | 1            | WRONG PUBLICATION TYPE: CONFERENCE ABSTRACT |
| Gurcan, 2018                       | Aggressions to psychiatric trainees by patients in Europe: assessing the prevalence and policy                           | European Psychiatry                               | 48            |              | WRONG PUBLICATION TYPE: CONFERENCE ABSTRACT |
| Batra et al., 2018                 | Burnout in pediatric residents: findings from a national longitudinal survey                                             | Academic Pediatrics                               | 18            | 5            | WRONG PUBLICATION TYPE: CONFERENCE ABSTRACT |
| Ashkenasi, Melnick & Parwani, 2018 | The association between physician empathy and admission rates                                                            | Academic Emergency Medicine                       | 25            |              | WRONG PUBLICATION TYPE: CONFERENCE ABSTRACT |
| Sousa et al., 2017                 | Divergent perceptions of gender interactions in a medical teaching environment                                           | Obstetrics and Gynecology                         | 130           |              | WRONG PUBLICATION TYPE: CONFERENCE ABSTRACT |
| Marchand & Dieter, 2017            | Compassion, resiliency, and hope: nurturing our innate qualities through contemplative practices                         | Journal of Pain and Symptom Management            | 53            | 2            | WRONG PUBLICATION TYPE: CONFERENCE ABSTRACT |
| Jonas, 2017                        | Bridging together: teamwork in caring for the family touched by CHD                                                      | Cardiology in the Young                           | 27            | 10           | WRONG PUBLICATION TYPE: CONFERENCE ABSTRACT |
| Holmes & Wang, 2017                | Association between physician empathy and patient real-time satisfaction                                                 | Annals of Emergency Medicine                      | 70            | 4            | WRONG PUBLICATION TYPE: CONFERENCE ABSTRACT |
| Cicekci & Kara, 2017               | The communication between the patients' relatives and the physicians in intensive care units with respect to brain death | Transplant International                          | 30            |              | WRONG PUBLICATION TYPE: CONFERENCE ABSTRACT |
| Batra et al., 2017                 | Burnout in pediatric residents: a national survey to inform future interventions                                         | Academic Pediatrics                               | 17            | 5            | WRONG PUBLICATION TYPE: CONFERENCE ABSTRACT |

## PREDICTORS OF PHYSICIAN COMPASSION: A SYSTEMATIC REVIEW

| Study (authors)                   | title                                                                                                                             | journal                                                            | volume | issue | REASONS FOR EXCLUSION                       |
|-----------------------------------|-----------------------------------------------------------------------------------------------------------------------------------|--------------------------------------------------------------------|--------|-------|---------------------------------------------|
| Van Mol, Nijkamp & Kompanje, 2016 | Work engagement among healthcare professionals in the intensive care unit                                                         | Critical Care                                                      | 20     |       | WRONG PUBLICATION TYPE: CONFERENCE ABSTRACT |
| Tierney et al., 2016              | Delivering compassionate diabetic care: the feedback loop and its maintenance in an unaccommodating environment                   | Diabetic Medicine                                                  | 33     |       | WRONG PUBLICATION TYPE: CONFERENCE ABSTRACT |
| Smith et al., 2016                | Measures of resident burnout, empathy, and emotional intelligence as a function of years in post-graduate training                | Annals of Emergency Medicine                                       | 68     | 4     | WRONG PUBLICATION TYPE: CONFERENCE ABSTRACT |
| Smith et al., 2016                | Burnout, empathy, and emotional intelligence amongst incoming residents of various specialties: are the differences born or made? | Annals of Emergency Medicine                                       | 68     | 4     | WRONG PUBLICATION TYPE: CONFERENCE ABSTRACT |
| Sinclair et al., 2016             | Digging in the dirt: findings and lessons learned from a comprehensive scoping review of compassion within clinical care          | Palliative Medicine                                                | 30     | 6     | WRONG PUBLICATION TYPE: CONFERENCE ABSTRACT |
| Sharma, 2016                      | Understanding residents' perspective on telemedicine                                                                              | Journal of the American Academy of Child and Adolescent Psychiatry | 55     | 10    | WRONG PUBLICATION TYPE: CONFERENCE ABSTRACT |
| Poi, Khoo and Hum, 2016           | Seeking equilibrium: Intra-role conflict in palliative care                                                                       | Annals of the Academy of Medicine Singapore                        | 45     | 9     | WRONG PUBLICATION TYPE: CONFERENCE ABSTRACT |
| McRae et al., 2016                | Erosion of empathy in primary care trainees                                                                                       | Value in Health                                                    | 19     | 3     | WRONG PUBLICATION TYPE: CONFERENCE ABSTRACT |
| Hutchinson & Landau, 2016         | Home visits: Population health one patient at a time                                                                              | Journal of General Internal Medicine                               | 31     | 2     | WRONG PUBLICATION TYPE: CONFERENCE ABSTRACT |
| Fernando & Consedine, 2016        | Are psychiatrists really compassionate?                                                                                           | Australian and New Zealand Journal of Psychiatry                   | 50     |       | WRONG PUBLICATION TYPE: CONFERENCE ABSTRACT |
| Tsyvkin, Riessman & Mathew, 2015  | Distrust and conflict in sickle cell disease: Intersecting narratives of patients and physicians                                  | Blood                                                              | 126    | 23    | WRONG PUBLICATION TYPE: CONFERENCE ABSTRACT |

## PREDICTORS OF PHYSICIAN COMPASSION: A SYSTEMATIC REVIEW

| Study (authors)                  | title                                                                                                                                                                 | journal                                                    | volume | issue | REASONS FOR EXCLUSION                       |
|----------------------------------|-----------------------------------------------------------------------------------------------------------------------------------------------------------------------|------------------------------------------------------------|--------|-------|---------------------------------------------|
| Opie & Parkes, 2015              | Empathy: Can it be enhanced by learning from the interactions between healthcare professionals with a disability and their patients?                                  | Physiotherapy (United Kingdom)                             | 101    |       | WRONG PUBLICATION TYPE: CONFERENCE ABSTRACT |
| Meli et al., 2015                | The spectre of death in the physician-patient relationship. The psychiatrist's point of view                                                                          | European Psychiatry                                        | 30     |       | WRONG PUBLICATION TYPE: CONFERENCE ABSTRACT |
| Chiarchiaro et al., 2015         | Conflict management strategies in the ICU differ between palliative care and non-palliative care clinicians                                                           | American Journal of Respiratory and Critical Care Medicine | 191    |       | WRONG PUBLICATION TYPE: CONFERENCE ABSTRACT |
| Capehorn et al., 2015            | Challenges faced by UK physicians when discussing the Type 2 diabetes diagnosis with patients: Insights from a cross-national study (IntroDiaTM)                      | Diabetic Medicine                                          | 32     |       | WRONG PUBLICATION TYPE: CONFERENCE ABSTRACT |
| Capehorn et al., 2015            | Physicians' challenges when discussing the need for additional oral medication with type 2 diabetes (T2D) patients: Insights from a cross-national study (IntroDiaTM) | Diabetes                                                   | 64     |       | WRONG PUBLICATION TYPE: CONFERENCE ABSTRACT |
| Basappa Krishnamurthy, 2015      | Insomnia affects empathy in health care workers                                                                                                                       | Sleep                                                      | 38     |       | WRONG PUBLICATION TYPE: CONFERENCE ABSTRACT |
| Seino et al., 2014               | Japanese physicians' challenges when discussing the type 2 diabetes diagnosis with patients: Insights from a cross-national study (IntroDiaTM)                        | Diabetes Research and Clinical Practice                    | 106    |       | WRONG PUBLICATION TYPE: CONFERENCE ABSTRACT |
| Patel et al., 2014               | Medical/Dental resident's burnout - The present plight and the dark future                                                                                            | Indian Journal of Psychiatry                               | 56     |       | WRONG PUBLICATION TYPE: CONFERENCE ABSTRACT |
| McFarland, Kirkwood & Maki, 2014 | Stress and empathy among internal medicine trainees on an inpatient hematology-oncology ward                                                                          | Journal of Clinical Oncology                               | 32     | 31    | WRONG PUBLICATION TYPE: CONFERENCE ABSTRACT |
| Kumar et al., 2014               | Creative practitioners                                                                                                                                                | Australian and New Zealand Journal of Psychiatry           | 48     |       | WRONG PUBLICATION TYPE: CONFERENCE ABSTRACT |
| Hirayama et al., 2014            | Evaluation of empathy for medical students, postgraduates and preceptors based on the scores of JSE questionnaire Japanese Version                                    | Medical Education, Supplement                              | 48     |       | WRONG PUBLICATION TYPE: CONFERENCE ABSTRACT |

## PREDICTORS OF PHYSICIAN COMPASSION: A SYSTEMATIC REVIEW

| Study (authors)                 | title                                                                                                                                                                 | journal                                         | volume | issue | REASONS FOR EXCLUSION                       |
|---------------------------------|-----------------------------------------------------------------------------------------------------------------------------------------------------------------------|-------------------------------------------------|--------|-------|---------------------------------------------|
| Belton et al., 2014             | Physicians' challenges when discussing the type 2 diabetes (T2D) diagnosis with patients: insights from a cross-national study (IntroDiaTM)                           | Canadian Journal of Diabetes                    | 38     |       | WRONG PUBLICATION TYPE: CONFERENCE ABSTRACT |
| Bellamy, Lambert & Girgis, 2014 | You can lead a horse to water, but you can't make it drink: does a needs assessment tool increase discussion of psychosocial concerns of people with advanced cancer? | Asia-Pacific Journal of Clinical Oncology       | 10     |       | WRONG PUBLICATION TYPE: CONFERENCE ABSTRACT |
| Aronson & Larson, 2014          | The human side of healthcare                                                                                                                                          | Journal of Pain and Symptom Management          | 47     | 2     | WRONG PUBLICATION TYPE: CONFERENCE ABSTRACT |
| Krause, McLeod & Sedran, 2013   | Caring for disadvantaged populations in the emergency department                                                                                                      | Canadian Journal of Emergency Medicine          | 15     |       | WRONG PUBLICATION TYPE: CONFERENCE ABSTRACT |
| Jocic, Krajnovic & Tadic, 2013  | Self- assesment of health professionals' communication skills with patients                                                                                           | Value in Health                                 | 16     | 7     | WRONG PUBLICATION TYPE: CONFERENCE ABSTRACT |
| Maytal & Jackson, 2012          | Difficult interactions in end-of-life care                                                                                                                            | Journal of Pain and Symptom Management          | 43     | 2     | WRONG PUBLICATION TYPE: CONFERENCE ABSTRACT |
| Fulop et al., 2012              | Over-involvement and burnout among psychiatry residents in Hungary                                                                                                    | European Psychiatry                             | 27     |       | WRONG PUBLICATION TYPE: CONFERENCE ABSTRACT |
| Peltzer-Jones et al., 2011      | Frequent emergency department users elicit negative feelings from emergency department physicians                                                                     | Academic Emergency Medicine                     | 18     | 5     | WRONG PUBLICATION TYPE: CONFERENCE ABSTRACT |
| Lelorain et al., 2011           | The ability of oncologists to infer the emotional distress and needs of their advanced cancer patients                                                                | Psycho-Oncology                                 | 20     |       | WRONG PUBLICATION TYPE: CONFERENCE ABSTRACT |
| Campbell et al., 2011           | "I feel like I'm not a doctor": physicians' perceptions of opioid management                                                                                          | Journal of General Internal Medicine            | 26     |       | WRONG PUBLICATION TYPE: CONFERENCE ABSTRACT |
| Dodds et al., 2014              | A longitudinal study of well-being, burnout and emotional intelligence in family medicine residents                                                                   | Journal of Alternative & Complementary Medicine | 20     | 5     | WRONG PUBLICATION TYPE: CONFERENCE ABSTRACT |

## PREDICTORS OF PHYSICIAN COMPASSION: A SYSTEMATIC REVIEW

| Study (authors)               | title                                                                                                                                                                  | journal                                                                       | volume | issue | REASONS FOR EXCLUSION                       |
|-------------------------------|------------------------------------------------------------------------------------------------------------------------------------------------------------------------|-------------------------------------------------------------------------------|--------|-------|---------------------------------------------|
| Fonville et al., 2010         | Exploring the use of technology in healthcare spaces and its impact on empathic communication                                                                          | 1st ACM International Health Informatics Symposium, IHI'10                    |        |       | WRONG PUBLICATION TYPE: CONFERENCE ABSTRACT |
| Muggleton, Guy & Howard, 2014 | Empathy against disgust: an interpretive phenomenological analysis of healthcare professionals' experiences of caring for palliative patients with disgusting symptoms | BMJ support. palliat. care                                                    | 4      |       | WRONG PUBLICATION TYPE: CONFERENCE ABSTRACT |
| Roy, 2015                     | Insomnia Leads to Less Empathy in Healthcare Workers                                                                                                                   |                                                                               |        |       | WRONG PUBLICATION TYPE: NEWS ARTICLE        |
| Ling, Petrakis & Olver, 2020  | The Use of Common Humanity Scenarios to Promote Compassion in Healthcare Workers.                                                                                      |                                                                               |        |       | WRONG SAMPLE                                |
| Svoll & Lindseth, 2016        | The issue of being touched                                                                                                                                             | Medicine, health care, and philosophy                                         | 19     | 2     | WRONG SAMPLE: CARE PROVIDER                 |
| Dattilo, 2007                 | The role of attachment style on clinician self-efficacy and empathy                                                                                                    | Dissertation Abstracts International: Section B: The Sciences and Engineering | 67     | 9     | WRONG SAMPLE: COUNSELLORS                   |
| Sox et al., 2019              | Burnout and empathy during the first quarter of pediatric internship                                                                                                   | Academic Pediatrics                                                           | 19     | 6     | WRONG SAMPLE: INTERNS                       |
| Holden, 1984                  | Compassion in medicine                                                                                                                                                 | Science (New York, N.Y.)                                                      | 223    | 4637  | WRONG SAMPLE: MEDICAL SCHOOLS               |
| Spiro, 2009                   | Commentary: The practice of empathy                                                                                                                                    | Academic medicine : journal of the Association of American Medical Colleges   | 84     | 9     | WRONG SAMPLE: MEDICAL STUDENTS              |
| Maina, 2018                   | A decade of studying implicit racial/ethnic bias in healthcare providers using the implicit association test                                                           | Social Science and Medicine                                                   | 199    |       | WRONG SAMPLE: MEDICAL STUDENTS              |
| Testerman et al., 1996        | The natural history of cynicism in physicians.                                                                                                                         | Academic Medicine                                                             |        |       | WRONG SAMPLE: MEDICAL STUDENTS              |
| Christiansen, 2015            | Delivering compassionate care: the enablers and barriers                                                                                                               | British journal of nursing (Mark Allen Publishing)                            | 24     | 16    | WRONG SAMPLE: MOSTLY NON-PHYSICIANS         |

## PREDICTORS OF PHYSICIAN COMPASSION: A SYSTEMATIC REVIEW

| Study (authors)                        | title                                                                                                                                                                                    | journal                                                                       | volume | issue | REASONS FOR EXCLUSION              |
|----------------------------------------|------------------------------------------------------------------------------------------------------------------------------------------------------------------------------------------|-------------------------------------------------------------------------------|--------|-------|------------------------------------|
| Henshall, 2018                         | The relationship between perceived organisational threat and compassion for others: Implications for the NHS                                                                             | Clinical psychology & psychotherapy                                           | 25     | 2     | WRONG SAMPLE: NO PHYSICIANS        |
| Kneafsey, 2016                         | A qualitative study of key stakeholders' perspectives on compassion in healthcare and the development of a framework for compassionate interpersonal relations                           | Journal of clinical nursing                                                   | 25     | 1     | WRONG SAMPLE: NO PHYSICIANS        |
| Bray, 2014                             | The role of professional education in developing compassionate practitioners: a mixed methods study exploring the perceptions of health professionals and pre-registration students      | Nurse education today                                                         | 34     | 3     | WRONG SAMPLE: NO PHYSICIANS        |
| Diekfuss, De Larwelle & McFadden, 2018 | Diagnosis makes a difference: Perceptions of older persons with dementia symptoms                                                                                                        | Experimental aging research                                                   | 44     | 2     | WRONG SAMPLE: NON MEDICAL STUDENTS |
| Singh, King-Shier & Sinclair, 2018     | The colours and contours of compassion: a systematic review of the perspectives of compassion among ethnically diverse patients and healthcare providers                                 | PloS one                                                                      | 13     | 5     | WRONG SAMPLE: NURSING              |
| O'Driscoll et al., 2018                | Compassion in practice-Evaluating the awareness, involvement and perceived impact of a national nursing and midwifery strategy amongst healthcare professionals in NHS Trusts in England | Journal of clinical nursing                                                   | 27     | 5     | WRONG SAMPLE: NURSING              |
| Dewar & Mackay, 2010                   | Appreciating and developing compassionate care in an acute hospital setting caring for older people                                                                                      | International journal of older people nursing                                 | 5      | 4     | WRONG SAMPLE: NURSING              |
| Shiparski, Laurie                      | Evoking the essence of caring: experiences from a Peruvian adventure relevant for leaders in healthcare today                                                                            | Nursing administration quarterly                                              | 32     | 1     | WRONG SAMPLE: NURSING              |
| Van Boekel et al., 2008                | Stigma among health professionals towards patients with substance use disorders and its consequences for healthcare delivery: systematic review                                          | Drug and Alcohol Dependence                                                   | 131    | 1     | WRONG SAMPLE: NURSING              |
| Bradley, 1995                          | Affective responses of health-care providers to self-mutilating adolescent behaviors                                                                                                     | Dissertation Abstracts International: Section B: The Sciences and Engineering | 55     | 12    | WRONG SAMPLE: NURSING              |

## PREDICTORS OF PHYSICIAN COMPASSION: A SYSTEMATIC REVIEW

| Study (authors)                            | title                                                                                                                                                                                                                          | journal                                                                        | volume | issue | REASONS FOR EXCLUSION            |
|--------------------------------------------|--------------------------------------------------------------------------------------------------------------------------------------------------------------------------------------------------------------------------------|--------------------------------------------------------------------------------|--------|-------|----------------------------------|
| Myhrvold, 2006                             | The different other--towards an including ethics of care                                                                                                                                                                       | Nursing philosophy : an international journal for healthcare professionals     | 7      | 3     | WRONG SAMPLE: NURSING            |
| Bogojevic, 2013                            | Empathy in treating forensic patient                                                                                                                                                                                           | European Psychiatry                                                            | 28     |       | WRONG SAMPLE: PSYCHOTHERAPISTS   |
| Norton, 1997                               | In the prison of severe personality disorder                                                                                                                                                                                   | Journal of Forensic Psychiatry                                                 | 8      | 2     | WRONG SAMPLE: PSYCHOTHERAPISTS   |
| Sella, 2007                                | Countertransference and empathy: The perceptions and experiences of polyglot immigrant clinicians, who, working with monolingual or bilingual immigrant children, are practicing in a language that is not their mother tongue | Dissertation Abstracts International Section A: Humanities and Social Sciences | 67     | 8     | WRONG SAMPLE: PSYCHOTHERAPISTS   |
| Jones, 2014                                | When one size does not fit all: a commentary                                                                                                                                                                                   | Narrative inquiry in bioethics                                                 | 4      | 2     | WRONG SAMPLE: SOCIAL WORKERS     |
| Stanley & Sethuramalingam, 2015            | Empathy in psychosocial intervention: A theoretical overview                                                                                                                                                                   | International Journal of Psychosocial Rehabilitation                           | 20     | 1     | WRONG SAMPLE: SOCIAL WORKERS     |
| Kessler et al., 2018                       | How empathic are vegan medical professionals compared to others? Leads from a paper-pencil-survey                                                                                                                              | European journal of clinical nutrition                                         | 72     | 5     | WRONG SAMPLE: UNCLEAR            |
| Hsu et al., 2011                           | Providing support to patients in emotional encounters: a new perspective on missed empathic opportunities                                                                                                                      | Journal of General Internal Medicine                                           | 26     |       | WRONG SAMPLE: UNCLEAR            |
| Bryan, 2006                                | "Aequanimitas" Redux: William Osler on detached concern versus humanistic empathy                                                                                                                                              | Perspectives in biology and medicine                                           | 49     | 3     | WRONG SAMPLE: WILLIAM OSLER      |
| Martingano & Martingano, 2017              | Measuring multidimensional empathy: theoretical and practical considerations for osteopathic medical researchers                                                                                                               | The Journal of the American Osteopathic Association                            | 117    | 11    | WRONG TARGET                     |
| Billings ME, Lazarus ME, Wenrich M, et al. | The effect of the hidden curriculum on resident burnout and cynicism                                                                                                                                                           | Journal of Graduate Medical Education                                          |        |       | WRONG TARGET                     |
| Phillips & Dalgarno, 2017                  | Professionalism, professionalization, expertise and compassion: a qualitative study of medical residents                                                                                                                       | BMC medical education                                                          |        |       | WRONG TARGET                     |
| Kerasidou et al., 2020                     | The need for empathetic healthcare systems.                                                                                                                                                                                    | Journal of Medical Ethics                                                      |        |       | WRONG TARGET: HEALTHCARE SYSTEMS |

## PREDICTORS OF PHYSICIAN COMPASSION: A SYSTEMATIC REVIEW

| Study (authors)      | title                                                                                      | journal                                  | volume | issue | REASONS FOR EXCLUSION |
|----------------------|--------------------------------------------------------------------------------------------|------------------------------------------|--------|-------|-----------------------|
| Simmons et al., 1992 | Residents' use of humanistic skills and content of resident discussions in a support group | American Journal of the Medical Sciences | 303    | 4     | WRONG TARGET: PEERS   |

### B) Reference searches

| STUDY                                                                                                                                                                                                                                                                                               | REASONS FOR EXCLUSION             |
|-----------------------------------------------------------------------------------------------------------------------------------------------------------------------------------------------------------------------------------------------------------------------------------------------------|-----------------------------------|
| Yuguero, O., Forné, C., Esquerda, M., Pifarré, J., Abadías, M. J., & Viñas, J. (2017). Empathy and burnout of emergency professionals of a health region: A cross-sectional study. <i>Medicine</i> , 96(37).                                                                                        | <50% SAMPLE; NO SEPARATE ANALYSIS |
| Cerit, K., Karataş, T., & Ekici, D. (2020). Behaviours of healthcare professionals towards difficult patients: A structural equation modelling study. <i>Nursing Ethics</i> , 27(2), 554-566.                                                                                                       | <50% SAMPLE; NO SEPARATE ANALYSIS |
| Cataldo KP, Peeden K, Geesey ME, Dickerson L. Association between K Balint training and physician empathy and work satisfaction. <i>Fam Med</i> 2005; 37: 328–31.                                                                                                                                   | INTERVENTION                      |
| Riess H, Kelley JM, Bailey RW, Dunn EJ, Phillips M. Empathy training for resident physicians: a randomized controlled trial of a neuroscience-informed curriculum. <i>J. Gen. Intern. Med.</i> 27(10), 1280–1286 (2012).                                                                            | INTERVENTION                      |
| Meyer, L. G. (2020). Teaching Doctors to Respond with Empathy: A Pilot Study (Doctoral dissertation, Arizona State University).                                                                                                                                                                     | INTERVENTION                      |
| Berry, K. R. (2019). Storytelling and How it Aids Empathy for Providers of the Trauma Patient Population.                                                                                                                                                                                           | INTERVENTION                      |
| Roseman, J. L. (2014). Reflections on the Sidney Project™: can we talk? Can we give voice to the taboo topics that are usually not embraced in residency medical education?. <i>Journal of pain and symptom management</i> , 48(3), 478-482.                                                        | INTERVENTION                      |
| Shariat SV, Keikhaveni A. (in press). Empathy in residents of clinical specialties of Iran University of Medical Sciences. <i>Iran J Psychiatry Clin Psychol</i> 16(3).                                                                                                                             | LANG: FARSI                       |
| Kataoka HU. Series: for attending physicians: professionalism; empathy in medicine. <i>Nihon Naika Gakkai Zasshi</i> 2012;101:2103–7.                                                                                                                                                               | LANG: JAPANESE                    |
| Aita, V., McIlvain, H., Backer, E., McVea, K., & Crabtree, B. (2005). Patient-centered care and communication in primary care practice: What is involved? <i>Patient Education and Counseling</i> , 58(3), 296–304.                                                                                 | NO FACTORS                        |
| Park, J., Saha, S., Han, D., Jindal, M., Korthuis, T., Moore, R., & Beach, M. C. (2020). Are clinicians' self-reported empathic concern and perspective-taking traits associated with their response to patient emotions?: <i>Communication Studies</i> . <i>Patient Education and Counseling</i> . | NO FACTORS                        |
| Linn LS, DiMatteo MR, Cope DW, Robbins A. Measuring physicians' humanistic attitudes, values, and behaviors. <i>Med Care</i> . 1987;25:504 –515.                                                                                                                                                    | NO FACTORS                        |
| Haslam N. Humanizing medical practice: the role of empathy. <i>Med. J. Aust.</i> 187(7), 381–382 (2007).                                                                                                                                                                                            | NO FACTORS                        |
| Frampton SB, Guastello S, Brady C et al. Patient-Centered Care Improvement Guide. Planetree/Picker Institute, CT, USA (2008).nCompendium of practical guidance, actionable tools and resources to facilitate implementation of patient-centered care.                                               | NO FACTORS                        |
| Glick S. M. The component elements of physician compassion. <i>Pharos Alpha Omega Alpha</i> 48, 9, 1985.                                                                                                                                                                                            | NO FACTORS                        |



## PREDICTORS OF PHYSICIAN COMPASSION: A SYSTEMATIC REVIEW

| STUDY                                                                                                                                                                                                                                                                                                                   | REASONS FOR EXCLUSION |
|-------------------------------------------------------------------------------------------------------------------------------------------------------------------------------------------------------------------------------------------------------------------------------------------------------------------------|-----------------------|
| P. Irving and D. Dickson, "Empathy: towards a conceptual framework for health professionals," <i>International Journal of Health Care Quality Assurance</i> , vol. 17, no. 4, pp. 212–220, 2004.                                                                                                                        | NO FACTORS            |
| Spreng RN , McKinnon MC , Mar RA , Levine B . The Toronto empathy questionnaire: Scale development and initial validation of a factor-analytic solution to multiple empathy measures . <i>J Pers Assess</i> . 2009 ; 91 : 62 – 71.                                                                                      | NO FACTORS            |
| Sinclair S, Hack TF, Raffin-Bouchal S, McClement S, Stajduhar K, Singh P, Hagen NA, Sinnarajah A, Chochinov HM. What are healthcare providers' understandings and experiences of compassion? The healthcare compassion model: a grounded theory study of healthcare providers in Canada <i>BMJ Open</i> 2018;8:e019701. | NO FACTORS            |
| Cole-King A, Gilbert P. Compassionate care: the theory and the reality. <i>J Holistic Healthcare</i> 2011; 8:29–36.                                                                                                                                                                                                     | NO FACTORS            |
| Ellis S: The patient-centred care model: holistic/multiprofessional/reflective. <i>Br J Nurs</i> 8: 296-301, 1999.                                                                                                                                                                                                      | NO FACTORS            |
| Bellet PS, Maloney M. The importance of empathy as an interviewing skill in medicine. <i>JAMA</i> 1991;266:1831–2                                                                                                                                                                                                       | NO FACTORS            |
| Dougherty CJ, Purtilo R. Physicians' duty of compassion. <i>Can Q Healthc Ethics</i> 1995;4:426–33.                                                                                                                                                                                                                     | NO FACTORS            |
| Stevenson AC. Compassion and patient centred care. <i>Aust Fam Physician</i> 2002;31:1103–1106.                                                                                                                                                                                                                         | NO FACTORS            |
| Thomasa DC, Kushner T. A dialogue on compassion and supererogation in medicine. <i>Camb Q Healthc Ethics</i> 1995;4:415– 425                                                                                                                                                                                            | NO FACTORS            |
| Abbott Moore L. Empathy: a clinician's perspective. <i>Asha Leader</i> . 2006;11(10):16–17.                                                                                                                                                                                                                             | NO FACTORS            |
| Brock C, Salinsky JV. Empathy: an essential skill for understanding the physician-patient relationship in clinical practice. <i>Fam Med</i> 1993;25:245–8.                                                                                                                                                              | NO FACTORS            |
| Constand, M. K., MacDermid, J. C., Dal Bello-Haas, V., & Law, M. (2014). Scoping review of patient-centered care approaches in healthcare. <i>BMC health services research</i> , 14(1), 271.                                                                                                                            | NO FACTORS            |
| Kalavana, T. V. (2016). Responding to emotions. <i>Clinical Communication in Medicine</i> . London: John Wiley & Sons, 91-97.                                                                                                                                                                                           | NO FACTORS            |
| Winer, J. A., Smilansky, J., & Newman, J. (1980). Competency based residency training, empathy, and interpretation. <i>Journal of Psychiatric Education</i> , 4(2), 131-140.                                                                                                                                            | NO FACTORS            |
| Kourakos, M. I., Vlachou, E. D., & Kelesi, M. N. (2018). Empathy in the health professions: an ally in the care of patients with chronic diseases. <i>International Journal of Health Sciences and Research</i> , 8(2), 233-240.                                                                                        | NO FACTORS            |
| De Zulueta, P. C. (2015). Suffering, compassion and 'doing good medical ethics'. <i>Journal of medical ethics</i> , 41(1), 87-90.                                                                                                                                                                                       | NO FACTORS            |
| Jeffrey, D. (2016). Empathy, sympathy and compassion in healthcare: Is there a problem? Is there a difference? Does it matter?. <i>Journal of the Royal Society of Medicine</i> , 109(12), 446-452.                                                                                                                     | NO FACTORS            |
| Papadopoulos, I., & Ali, S. (2016). Measuring compassion in nurses and other healthcare professionals: An integrative review. <i>Nurse education in practice</i> , 16(1), 133-139.                                                                                                                                      | NO FACTORS            |
| Kang WS, Kim YH, Chang HI. An investigation on reliability and validity of the Korean Physician Empathy Rating Scale. <i>Korean J Psychopathol</i> 2006; 15: 11-8.                                                                                                                                                      | NO FULL TEXT          |
| Ward BJ: The other side of the consulting desk. A GP's experience of being a cancer patient's daughter. <i>Aust Fam Physician</i> 2002, 31(6):573-4.                                                                                                                                                                    | NO FULL TEXT          |

## PREDICTORS OF PHYSICIAN COMPASSION: A SYSTEMATIC REVIEW

| STUDY                                                                                                                                                                                                                                         | REASONS FOR EXCLUSION   |
|-----------------------------------------------------------------------------------------------------------------------------------------------------------------------------------------------------------------------------------------------|-------------------------|
| Crawford P, Gilbert P, Gilbert J & Gale C (2011) The language of compassion. <i>Taiwan International English for Specific Purposes Journal</i> 3, 1–16.                                                                                       | NO FULL TEXT            |
| Betcher DK (2010) Elephant in the room project: improving caring efficacy through effective and compassionate communication with palliative care patients. <i>Medsurg Nursing</i> 19, 101–105.                                                | NO FULL TEXT            |
| Middleton JA, Sen P, Middleton JR: Teaching humanistic behavior: humanities study in the internal medicine residency. <i>N J Med</i> 1993; 90:763–766                                                                                         | NO FULL TE              |
| Shanafelt, T. D., Bradley, K. A., Wipf, J. E., & Back, A. L. (2002). Burnout and self reported patient-care in an internal medicine residency program. <i>Annals of Internal Medicine</i> , 136, 358-367.                                     | NOT A CENTRAL CONSTRUCT |
| McGaghie WC, Mytko JJ, Brown WN, Cameron JR. Altruism and compassion in the health professions: a search for clarity and precision. <i>Med Teach</i> 2002; 24(4): 374–378                                                                     | NOT A CENTRAL CONSTRUCT |
| Burack, J. H., Irby, D. M., Carline, J. D., Root, R. K., & Larson, E. B. (1999). Teaching compassion and respect: Attending physicians' responses to problematic behaviours. <i>Journal of General Internal Medicine</i> , 14(1), 49-55.      | NOT A CENTRAL CONSTRUCT |
| Levinson W, Gorawara-Bhat R, Lamb J. A study of patient clues and physician responses in primary care and surgical settings. <i>JAMA</i> . 2000;284:1021–7.                                                                                   | NOT A CENTRAL CONSTRUCT |
| Salmon P, Dowrick CF, Ring A, Humphris GM. Voiced but unheard agendas: qualitative analysis of the psychosocial cues that patients with unexplained symptoms.                                                                                 | NOT A CENTRAL CONSTRUCT |
| Engel G. L. The clinical application of the biopsychosocial model. <i>Am. J. Psychiat.</i> 137, 535, 1980.                                                                                                                                    | NOT A CENTRAL CONSTRUCT |
| Firth-Cozens, J. , & Greenhalgh, J. (1997). Doctors' perceptions of the links between stress and lowered clinical care. <i>Social Science Medicine</i> , 44, 1017-1022.                                                                       | NOT A CENTRAL CONSTRUCT |
| Stevens LA. Muskin PR: Techniques for reversing the failure of empathy towards AIDS patients. <i>J Am Acad Psychoanal</i> 1987;15:539-551.                                                                                                    | NOT A CENTRAL CONSTRUCT |
| Crawford P & Brown B (2011) Fast healthcare: brief communication, traps and opportunities. <i>Patient Education &amp; Counseling</i> 82, 3–10.                                                                                                | NOT A CENTRAL CONSTRUCT |
| Laine C, Davidoff F: Patient-centered medicine. A professional evolution. <i>JAMA</i> 275: 152-156, 1996.                                                                                                                                     | NOT A CENTRAL CONSTRUCT |
| Emmanuel, E, Brett, A. Managed competition and the patient-physician relationship. <i>New England Journal of Medicine</i> 1993;329:879–82.                                                                                                    | NOT A CENTRAL CONSTRUCT |
| Callaghan, K. A., & Fanning, J. B. (2018). Managing bias in palliative care: professional hazards in goals of care discussions at the end of life. <i>American Journal of Hospice and Palliative Medicine</i> ®, 35(2), 355-363.              | NOT A CENTRAL CONSTRUCT |
| Hanževački, M., Jakovina, T., Tomac, A., & Mercer, S. (2015). Reliability and validity of the Croatian version of consultation and relational empathy (CARE) measure in primary care setting. <i>Croatian medical journal</i> , 56(1), 50-56. | NOT A CENTRAL CONSTRUCT |
| Matthias, M. S., Parpart, A. L., Nyland, K. A., Huffman, M. A., Stubbs, D. L., Sargent, C., & Bair, M. J. (2010). The patient–provider relationship in chronic pain care: providers' perspectives. <i>Pain Medicine</i> , 11(11), 1688-1697.  | NOT A CENTRAL CONSTRUCT |

## PREDICTORS OF PHYSICIAN COMPASSION: A SYSTEMATIC REVIEW

| STUDY                                                                                                                                                                                                                                                                                                                                                        | REASONS FOR EXCLUSION          |
|--------------------------------------------------------------------------------------------------------------------------------------------------------------------------------------------------------------------------------------------------------------------------------------------------------------------------------------------------------------|--------------------------------|
| D. B. Monsivais and J. C. Engebretson, "Cultural cues: review of qualitative evidence of patient-centered care in patients with nonmalignant chronic pain," <i>Rehabilitation Nursing</i> , vol. 36, no. 4, pp. 166–171, 2011.                                                                                                                               | PATIENT PERCEPTIONS            |
| Floyd MR, Lang F, McCord RS, Keener M. Patients with worry: presentation of concerns and expectations for response. <i>Patient Educ Couns</i> . 2005;57:211–6. 17.                                                                                                                                                                                           | PATIENT PERCEPTIONS            |
| Rodriguez, A. M., & Lown, B. A. (2018). Measuring compassionate care with the 12-item Schwartz Center Compassionate Care Scale. <i>PLoS One</i> , 14(9), e0220911.                                                                                                                                                                                           | PATIENT PERCEPTIONS            |
| Mercer, S. W., Maxwell, M., Heaney, D., & Watt, G. (2004). The consultation and relational empathy (CARE) measure: development and preliminary validation and reliability of an empathy-based consultation process measure. <i>Family practice</i> , 21(6), 699-705.                                                                                         | PATIENT PERCEPTIONS            |
| Sinclair S, McClement S, Raffin-Bouchal S, Hack TF, Hagen NA, McConnell S, Chochinov HM. Compassion in health care: an empirical model. <i>J Pain Symptom Manag</i> 2016;51:193–203.                                                                                                                                                                         | PATIENT PERCEPTIONS            |
| Lundy, J. M., Bikker, A., Higgins, M., Watt, G. C., Little, P., Humphries, G. M., & Mercer, S. W. (2015). General practitioners' patient-centredness and responses to patients' emotional cues and concerns: relationships with perceived empathy in areas of high and low socioeconomic deprivation. <i>Journal of Compassionate Health Care</i> , 2(1), 2. | PATIENT PERCEPTIONS            |
| M. M. Alamo, R. R. Moral, and L. A. P. de Torres, "Evaluation of a patient-centred approach in generalized musculoskeletal chronic pain/fibromyalgia patients in primary care," <i>Patient Education and Counseling</i> , vol. 48, no. 1, pp. 23–31, 2002.                                                                                                   | PREDICTOR                      |
| W.T. Branch Jr., R. Frankel, Not all stories of professional identity formation are equal: an analysis of formation narratives of highly humanistic physicians, <i>Patient Educ. Couns</i> . 99 (2016) 1394–1399.                                                                                                                                            | WRONG CONSTRUCT                |
| Curlin F A, Selligren SA, Lantos J D, Chin M H. Physicians' observations and interpretations of the influence of religion and spirituality on health. <i>Arch Intern Med</i> . 2007; 167(7): 649-54.                                                                                                                                                         | WRONG CONSTRUCT                |
| Rosen, I. M., Bellini, L. M., & Shea, J. A. (2004). Sleep behaviors and attitudes among internal medicine housestaff in a U. S. university-based residency program. <i>Academic Medicine</i> , 79, 407-416.                                                                                                                                                  | WRONG CONSTRUCT                |
| Charon, R. (2001). Narrative medicine: a model for empathy, reflection, profession, and trust. <i>Jama</i> , 286(15), 1897-1902.                                                                                                                                                                                                                             | WRONG CONSTRUCT                |
| Alexander SC, Ladwig S, Norton SA, Gramling D, Davis JK, Metzger M, et al. Emotional distress and compassionate responses in palliative care decision-making consultations. <i>J Palliat Med</i> . 2014;17(5):579–84. doi:10.1089/jpm.2013.0551.                                                                                                             | WRONG CONSTRUCT                |
| Pembroke NF. Empathy, emotion, and ekstasis in the patient-physician relationship. <i>J Relig Health</i> 2007;46:287–298                                                                                                                                                                                                                                     | WRONG CONSTRUCT                |
| Epstein RM, Shields CG, Meldrum SC, et al. Physicians' responses to patients' medically unexplained symptoms. <i>Psychosom Med</i> . 2006;68:269–76.                                                                                                                                                                                                         | WRONG CONSTRUCT: COMMUNICATION |
| Fiscella K, Meldrum S, Franks P, et al. Patient trust: is it related to patient-centered behavior of primary care physicians? <i>Med Care</i> . 2004;42:1049–55.                                                                                                                                                                                             | WRONG CONSTRUCT: COMMUNICATION |
| Cooper, L. A., Roter, D. L., Johnson, R. L., Ford, D. E., Steinwachs, D. M., & Powe, N. R. (2003). Patient-centered communication, ratings of care, and concordance of patient and physician race. <i>Annals of Internal Medicine</i> , 139(11), 907–915.                                                                                                    | WRONG CONSTRUCT: COMMUNICATION |
| Street RL Jr, Liu L, Farber JG, Chen Y, Calvitti A, Zuest D, Gabuzda MT, Bell K, Gray B, Rick S, Ashfaq S, Agha Z. Provider interaction with the electronic health record: the effects on patient-centered communication in medical encounters. <i>Patient Educ Couns</i> 2014;96 (3):315–9.                                                                 | WRONG CONSTRUCT: COMMUNICATION |

## PREDICTORS OF PHYSICIAN COMPASSION: A SYSTEMATIC REVIEW

| STUDY                                                                                                                                                                                                                                                                                                                                                                                                                 | REASONS FOR EXCLUSION                           |
|-----------------------------------------------------------------------------------------------------------------------------------------------------------------------------------------------------------------------------------------------------------------------------------------------------------------------------------------------------------------------------------------------------------------------|-------------------------------------------------|
| Adarkwah, C. C., Schwaffertz, A., Labenz, J., Becker, A., & Hirsch, O. (2018). Burnout and work satisfaction in general practitioners practicing in rural areas: results from the HaMEdSi study. <i>Psychology research and behavior management</i> , 11, 483.                                                                                                                                                        | WRONG CONSTRUCT: DEPERSONALISATION              |
| Weed MA: A cure for the empathy gap? Experience and perspective of a chronically ill and disabled medical educator. <i>Arch Ophthalmol</i> 2012, 130(2):263–264.                                                                                                                                                                                                                                                      | WRONG PUBLICATION TYPE                          |
| Hojat M, Mangione S, Gonnella JS, et al. Empathy in medical education and patient care. <i>Acad Med</i> . 2001;76:669.                                                                                                                                                                                                                                                                                                | WRONG PUBLICATION TYPE                          |
| Dagnone JD. Commentary: The physician as person framework: how human nature impacts empathy, depression, burnout, and the practice of medicine. <i>Can Med Educ J</i> 2017;8(4).                                                                                                                                                                                                                                      | WRONG PUBLICATION TYPE                          |
| McClure R. Greater Good Science Center. Sustaining Compassion in Health Care. (2013)                                                                                                                                                                                                                                                                                                                                  | WRONG PUBLICATION TYPE                          |
| Smith P. Guest editorial: compassion and smiles: what's the evidence? <i>J. Res. Nursing</i> . 13, 367–370 (2008).                                                                                                                                                                                                                                                                                                    | WRONG PUBLICATION TYPE                          |
| Conversano, C., Ciacchini, R., Orrù, G., Di Giuseppe, M., Gemignani, A., & Poli, A. (2020). Mindfulness, Compassion, and Self-Compassion Among Health Care Professionals: What's New? A Systematic Review. <i>Frontiers in Psychology</i> , 11, 1683.                                                                                                                                                                 | WRONG PUBLICATION TYPE: REVIEW OF INTERVENTIONS |
| Tunis SR, Messner DA, Mohr P, Gliklich RE, Dubois RW. A translation table for patient-centered comparative research: guidance to improve the value of research for clinical and health policy decision- making. <i>J. Comp. Eff. Res.</i> 1(3), 259–262 (2012). 70 Planetree. Planetree Patient-Centered Hospital Designation® Criteria. Planetree, CT, USA                                                           | WRONG PUBLICATION TYPE                          |
| Greenland P: What If the Patient Were Your Mother? <i>Arch Intern Med</i> 2005, 165:607-608.                                                                                                                                                                                                                                                                                                                          | WRONG PUBLICATION TYPE                          |
| Jenni OG: On the other side of the tracks. <i>Lancet</i> 2000, 355:139-140.                                                                                                                                                                                                                                                                                                                                           | WRONG PUBLICATION TYPE                          |
| Anfossi M, Numico G. Empathy in the doctor-patient relationship. <i>J Clin Oncol</i> , 2004; 22(11): 2258-59.                                                                                                                                                                                                                                                                                                         | WRONG PUBLICATION TYPE                          |
| Bennett E, Hirsch JS. Physician Empathy in Correctional Facilities: Still in Need of Analysis. <i>Virtual Mentor</i> . 2008;10(2):96.                                                                                                                                                                                                                                                                                 | WRONG PUBLICATION TYPE                          |
| Killam, K. (2015.). Building Empathy in Healthcare. Retrieved June 12, 2016, from <a href="http://www.dailygood.org/story/930/building-empathy-in-healthcare-kasley-killam/">http://www.dailygood.org/story/930/building-empathy-in-healthcare-kasley-killam/</a> .                                                                                                                                                   | WRONG PUBLICATION TYPE                          |
| The Kings Fund. The point of care – enabling compassionate care in acute hospital settings. See <a href="http://www.kingsfund.org.uk/sites/default/files/field/field_publication_file/poc-enabling-compassionate-care-hospital-settings-apr09.pdf">www.kingsfund.org.uk/sites/default/files/field/field_publication_file/poc-enabling-compassionate-care-hospital-settings-apr09.pdf</a> (last checked 6 April 2018). | WRONG PUBLICATION TYPE                          |
| Want a compassionate NHS? Then makes sure staff are happy. Article on The Guardian. See <a href="http://www.theguardian.com/healthcare-network/2015/aug/25/want-a-compassionate-nhs-then-make-sure-staff-are-happy">www.theguardian.com/healthcare-network/2015/aug/25/want-a-compassionate-nhs-then-make-sure-staff-are-happy</a> (2015, last checked 6 April 2018).                                                 | WRONG PUBLICATION TYPE                          |

## PREDICTORS OF PHYSICIAN COMPASSION: A SYSTEMATIC REVIEW

| STUDY                                                                                                                                                                                                                                                                                                                                                                                                                                                                                                                                                                                  | REASONS FOR EXCLUSION  |
|----------------------------------------------------------------------------------------------------------------------------------------------------------------------------------------------------------------------------------------------------------------------------------------------------------------------------------------------------------------------------------------------------------------------------------------------------------------------------------------------------------------------------------------------------------------------------------------|------------------------|
| Building and strengthening leadership – leading with compassion. NHS survey document. See <a href="http://www.england.nhs.uk/wp-content/uploads/2014/12/london-nursing-accessible.pdf">www.england.nhs.uk/wp-content/uploads/2014/12/london-nursing-accessible.pdf</a> (2014, last checked 12 April 2018).                                                                                                                                                                                                                                                                             | WRONG PUBLICATION TYPE |
| Nauert R (2011) Compassion Missing in American Health Care. PsychCentral. Available at: <a href="http://psychcentral.com/news/2011/09/09/compassion-missing-in-american-health-care/29295.html">http://psychcentral.com/news/2011/09/09/compassion-missing-in-american-health-care/29295.html</a> (accessed 31 August 2012).                                                                                                                                                                                                                                                           | WRONG PUBLICATION TYPE |
| Parliamentary and Health Service Ombudsman (2011) Care and Compassion? Report of the Health Service Ombudsman on Ten Investigations into NHS Care of Older People. The Stationery Office, London.                                                                                                                                                                                                                                                                                                                                                                                      | WRONG PUBLICATION TYPE |
| Firth-Cozens J & Cornwell J (2009) The Point of Care: Enabling Compassionate Care in Acute Hospital Settings. King’s Fund, London.                                                                                                                                                                                                                                                                                                                                                                                                                                                     | WRONG PUBLICATION TYPE |
| Cornwell J (2012) Developing a Culture of Compassionate Care. Available at: <a href="http://www.kingsfund.org.uk/blog/2012/10/developing-culture-compassionatecare">http://www.kingsfund.org.uk/blog/2012/10/developing-culture-compassionatecare</a> (accessed 10 October 2012).                                                                                                                                                                                                                                                                                                      | WRONG PUBLICATION TYPE |
| Macnaughton J: The dangerous practice of empathy. <i>Lancet</i> 2009;373:1940–1941.                                                                                                                                                                                                                                                                                                                                                                                                                                                                                                    | WRONG PUBLICATION TYPE |
| Davis MA: A perspective on cultivating clinical empathy. <i>Complement Ther Clin Pract</i> 2009;15:76– 79                                                                                                                                                                                                                                                                                                                                                                                                                                                                              | WRONG PUBLICATION TYPE |
| Smajdor A. Compassion is not the answer to failings in the NHS. <i>The Guardian</i> , 19 Sep 2013. <a href="http://www.theguardian.com/healthcare-network/2013/sep/19/compassion-failings-nhs">http://www.theguardian.com/healthcare-network/2013/sep/19/compassion-failings-nhs</a>                                                                                                                                                                                                                                                                                                   | WRONG PUBLICATION TYPE |
| Barnes, D. (2017). Constrained compassion                                                                                                                                                                                                                                                                                                                                                                                                                                                                                                                                              | WRONG PUBLICATION TYPE |
| Fotaki, M. (2015). What money cannot buy? compassion in healthcare: a response to the recent commentaries. <i>International journal of health policy and management</i> , 4(12), 873.                                                                                                                                                                                                                                                                                                                                                                                                  | WRONG PUBLICATION TYPE |
| Lown BA, McIntosh S. Advancing compassionate, person- and family-centered care through interprofessional education for collaborative practice. Available at: <a href="http://www.theschwartzcenter.org/supporting-caregivers/educationalprograms/conferences/">http://www.theschwartzcenter.org/supporting-caregivers/educationalprograms/conferences/</a> and <a href="http://humanism-inmedicine.org/advancing-compassionate-patient-andperson-centered-care/">http://humanism-inmedicine.org/advancing-compassionate-patient-andperson-centered-care/</a> . [Accessed 20 May 2015.] | WRONG PUBLICATION TYPE |
| Miles A, Asbridge JE. On the need for transformational leadership in the delivery of person-centered clinical practice within 21st Century healthcare systems. <i>Eur J Pers Cent Healthc</i> . 2014;2:261-4.                                                                                                                                                                                                                                                                                                                                                                          | WRONG PUBLICATION TYPE |
| Bresnahan, J. Compassionate response to human suffering: a neglected issue in health care reform. <i>Kansas Journal of Law and Public Policy</i> 1993;Fall:23–30.                                                                                                                                                                                                                                                                                                                                                                                                                      | WRONG PUBLICATION TYPE |
| Winter, G. (2018). Cultivating a compassionate healthcare workforce nationally. <i>British Journal of Healthcare Management</i> , 24(10), 474-475.                                                                                                                                                                                                                                                                                                                                                                                                                                     | WRONG PUBLICATION TYPE |
| Haramati, A., Cotton, S., Padmore, J. S., Wald, H. S., & Weissinger, P. A. (2017). Strategies to promote resilience, empathy and well-being in the health professions: Insights from the 2015 CENTILE Conference. <i>Medical teacher</i> , 39(2), 118-119.                                                                                                                                                                                                                                                                                                                             | WRONG PUBLICATION TYPE |
| Kompanje, E. J., van Mol, M. M., & Weigel, J. (2017). Will we become more compassionate or empathic intensive care professionals by watching films and documentaries about suffering?. <i>Intensive Care Medicine</i> , 43(4), 560-561.                                                                                                                                                                                                                                                                                                                                                | WRONG PUBLICATION TYPE |

## PREDICTORS OF PHYSICIAN COMPASSION: A SYSTEMATIC REVIEW

| STUDY                                                                                                                                                                                                                                                                                           | REASONS FOR EXCLUSION                |
|-------------------------------------------------------------------------------------------------------------------------------------------------------------------------------------------------------------------------------------------------------------------------------------------------|--------------------------------------|
| Frampton SB, Charmel, PA. Putting Patients First: Designing and Practicing Patient-Centered Care (2nd Edition). Jossey-Bass, San Francisco, CA, USA (2008).                                                                                                                                     | WRONG PUBLICATION TYPE: BOOK         |
| Sarason S. B. Caring and Compassion in Clinical Practice. Jossey-Bass, San Francisco, CA, 1985.                                                                                                                                                                                                 | WRONG PUBLICATION TYPE: BOOK         |
| Gold AP: The “White Coat Ceremony” A Psychological Contract for Professionalism and Empathy in Medicine. Englewood Cliffs, NJ, Arnold P. Gold Foundation, 1995                                                                                                                                  | WRONG PUBLICATION TYPE: BOOK         |
| Halifax J: Understanding and cultivating compassion in clinical settings: the A.B.I.D.E. compassion model. In: Singer T and Mattias Buiz (eds): Compassion: Bridging Compassion and Science. 2013, pp. 206–226. Leipzig, Germany: Max Plank Institute Society,                                  | WRONG PUBLICATION TYPE: BOOK         |
| Harrigan, J. A., & Rosenthal, R. (1986). Nonverbal aspects of empathy and rapport in physician–patient interaction. In P. D. Blank, R. Buck, & R. Rosenthal (Eds.), Nonverbal communication in the clinical context. (pp. 36–73). University Park, PA: The Pennsylvania State University Press. | WRONG PUBLICATION TYPE: BOOK         |
| More ES. “Empathy” enters the profession of medicine. In: More ES, Milligan MA, editors. The empathic practitioner: empathy, gender, and medicine. New Brunswick (NJ): Rutgers University Press; 1994. p. 19–39.                                                                                | WRONG PUBLICATION TYPE: BOOK         |
| Milligan MA, More ES. Introduction. In: More ES, Milligan MA, editors. The empathic practitioner: empathy, gender and medicine. New Brunswick (NJ): Rutgers University Press; 1994. p. 1–15                                                                                                     | WRONG PUBLICATION TYPE: BOOK         |
| Halpern, J., 2001. From detached concern to empathy: humanizing medical practice. BMJ Br. Med. J. (Clin. Res. Ed.) 323 (7325) 1373-1373.                                                                                                                                                        | WRONG PUBLICATION TYPE: BOOK         |
| Charlton R. Compassion: Compassion, Continuity and Caring in the NHS. London: RCGP Publications, 2015.                                                                                                                                                                                          | WRONG PUBLICATION TYPE: BOOK         |
| Lipkin M, Putnam SM, Lazare A. The medical interview: clinical care, education, and research. New York: Springer; 1995.                                                                                                                                                                         | WRONG PUBLICATION TYPE: BOOK         |
| Lowenstein J. Can you teach compassion? The midnight meal and other essays about doctors, patients, and medicine. New Haven: Yale University Press; 1997                                                                                                                                        | WRONG PUBLICATION TYPE: BOOK         |
| Ballatt J, Campling P (2011) Intelligent Kindness: Reforming the Culture of Healthcare. RCPsych Publications, London.                                                                                                                                                                           | WRONG PUBLICATION TYPE: BOOK         |
| Hordern, J. (2017). Compassion in primary and community healthcare. In Hand of primary care ethics. Taylor & Francis.                                                                                                                                                                           | WRONG PUBLICATION TYPE: BOOK         |
| Harms, S., & Acai, A. (2020). Steps Toward Building a Culture of Humanistic Teaching and Medical Practice. In Humanism and Resilience in Residency Training (pp. 527-554). Springer, Cham                                                                                                       | WRONG PUBLICATION TYPE: BOOK         |
| West, M. A., & Chowla, R. (2017). Compassionate leadership for compassionate health care. Compassion: concepts, research and applications. London: Routledge, 237-57.                                                                                                                           | WRONG PUBLICATION TYPE: BOOK         |
| Berk, L. (2017). Oncologists and Death. In Dying and Death in Oncology (pp. 137-146). Springer, Cham.                                                                                                                                                                                           | WRONG PUBLICATION TYPE: BOOK         |
| Snelling, P. (2018). Why you cannot regulate for virtuous compassion. Cultivating moral character and virtue in professional practice, 15-28.                                                                                                                                                   | WRONG PUBLICATION TYPE: BOOK CHAPTER |

## PREDICTORS OF PHYSICIAN COMPASSION: A SYSTEMATIC REVIEW

| STUDY                                                                                                                                                                                                                                                                                                                                                               | REASONS FOR EXCLUSION                       |
|---------------------------------------------------------------------------------------------------------------------------------------------------------------------------------------------------------------------------------------------------------------------------------------------------------------------------------------------------------------------|---------------------------------------------|
| Soncini, F.; Silvestrini, G.; Poscia, A.; Ciorba, V.; Conti, A.; Murru, C.; Rinaldi, A.; Zoccali, A.; Azzolini, E.; Bandini, C.B.L.; et al. Public Health Physicians and Empathy. Are we really empathic? The Jefferson Scale applied to Italian resident doctors in Public Health Francesco Soncini. <i>Eur. J. Public Health</i> 2013, 23 (Suppl. 1), ckt124.068. | WRONG PUBLICATION TYPE: CONFERENCE ABSTRACT |
| Bryan C. Caring Carefully: Sir William Osler on the issue of competence vs. compassion in medicine. <i>BUMC Proceedings</i> . 1999;12(4):277-288.                                                                                                                                                                                                                   | WRONG PUBLICATION TYPE: CONFERENCE ABSTRACT |
| Dornbush R. L., Richman S., Singer P., Brownstein E. J., Brink A. and Freedman A. M. Empathy and psychosocial attitudes in medical school faculty and students. <i>Procs 24th Ann. ConJ~ Res. med. Educ.</i> , 1985.                                                                                                                                                | WRONG PUBLICATION TYPE: CONFERENCE ABSTRACT |
| Brien S, Lewith G. Why are you doctors? The importance of care and compassion. <i>Clin Med</i> 2001;1:223–226.                                                                                                                                                                                                                                                      | WRONG PUBLICATION TYPE: CONFERENCE ABSTRACT |
| Ling, D., Petrakis, M., & Olver, J. H. (2020). The Use of Common Humanity Scenarios to Promote Compassion in Healthcare Workers. <i>Australian Social Work</i> , 1-12.                                                                                                                                                                                              | WRONG SAMPLE                                |
| Testerman JK, Morton KR, Loo LK, et al. The natural history of cynicism in physicians. <i>Acad Med</i> 1996;71:S43–5.                                                                                                                                                                                                                                               | WRONG SAMPLE                                |
| Redelmeier DA, Molin JP, Tibshirani RJ. A randomised trial of compassionate care for the homeless in an emergency department. <i>Lancet</i> 1995; 345(8958): 1131–1134.                                                                                                                                                                                             | WRONG SAMPLE                                |
| Singer T, Klimecki OM. 2014. Empathy and compassion. <i>Curr Biol</i> . 24:R875–R878.                                                                                                                                                                                                                                                                               | WRONG SAMPLE                                |
| Drwecki, B. B., C. F. Moore, S. E. Ward, and K. M. Prkachin. 2011. Reducing racial disparities in pain treatment: The role of empathy and perspective-taking. <i>Pain</i> 152(5): 1001–1006. <a href="http://dx.doi.org/10.1016/j.pain.2010.12.005">http://dx.doi.org/10.1016/j.pain.2010.12.005</a>                                                                | WRONG SAMPLE                                |
| Egan, H., Keyte, R., McGowan, K., Peters, L., Lemon, N., Parsons, S., ... & Mantzios, M. (2019). 'You Before Me': A qualitative study of health care professionals' and students' understanding and experiences of compassion in the workplace, self-compassion, self-care and health behaviours. <i>Health Professions Education</i> , 5(3), 225-236.              | WRONG SAMPLE                                |
| Ling, D. J. (2019). Investigating the relationship between the perception of common humanity and compassion in healthcare workers (Doctoral dissertation, Monash University).                                                                                                                                                                                       | WRONG SAMPLE                                |
| Simon, C. E., Pryce, J. G., Roff, L. L., & Klemmack, D. (2006). Secondary traumatic stress and oncology social work: Protecting compassion from fatigue and compromising the worker's worldview. <i>Journal of psychosocial oncology</i> , 23(4), 1-14.                                                                                                             | WRONG SAMPLE                                |
| Goldberg, M. J. (2020). Compassionate Care: Making It a Priority and the Science Behind It. <i>Journal of Pediatric Orthopaedics</i> , 40, S4-S7.                                                                                                                                                                                                                   | WRONG SAMPLE                                |
| Kneafsey, R., & Andrews, H. (2018). Nurturing and supporting compassion. <i>Journal of the Australasian Rehabilitation Nurses Association</i> , 21(3), 3.                                                                                                                                                                                                           | WRONG SAMPLE: NURSING                       |
| P.F. Weissmann, W.T. Branch, C.F. Gracey, P. Haidet, R.M. Frankel, Role modelling humanistic behavior: learning bedside manner from the experts, <i>Acad. Med.</i> 81 (2006) 661–667.                                                                                                                                                                               | WRONG SAMPLE: TEACHERS                      |



## PREDICTORS OF PHYSICIAN COMPASSION: A SYSTEMATIC REVIEW

| STUDY                                                                                                                                                                                                                        | REASONS FOR EXCLUSION    |
|------------------------------------------------------------------------------------------------------------------------------------------------------------------------------------------------------------------------------|--------------------------|
| Miller, K., Birkholt, M., Scott, C., & Stage, C. (1995). Empathy and burnout in human service work: An extension of a communication model. <i>Communication Research</i> , 22, 123-147.                                      | WRONG SAMPLE:<br>UNCLEAR |
| Miller, K. I., Stiff, J. B., & Ellis, B. H. (1988). Communication and empathy as precursors to burnout among human service workers. <i>Communication Monographs</i> , 55, 250-265.                                           | WRONG SAMPLE:<br>UNCLEAR |
| Montross-Thomas LP, Scheiber C, Meier EA, Irwin SA. Personally meaningful rituals: a way to increase compassion and decrease burnout among hospice staff and volunteers. <i>J Palliat Med</i> 2016; 19:1043–1050.            | WRONG SAMPLE:<br>UNCLEAR |
| Price, V. (2016). Effects of priming personal values on empathic behaviour of NHS staff (Doctoral dissertation, Cardiff University).                                                                                         | WRONG SAMPLE:<br>UNCLEAR |
| Phillips, S. P., & Dalgarno, N. (2017). Professionalism, professionalization, expertise and compassion: a qualitative study of medical residents. <i>BMC medical education</i> , 17(1), 1-7.                                 | WRONG TARGET:<br>PEERS   |
| Billings ME, Lazarus ME, Wenrich M, et al. The effect of the hidden curriculum on resident burnout and cynicism. <i>J Grad Med Educ</i> 2011;3:503–10.                                                                       | WRONG TARGET             |
| Pence G. E. Can compassion be taught? <i>J. reed. Ethics</i> 9, 189, 1983.                                                                                                                                                   | WRONG TARGET             |
| Gracey CF, Haidet P, Branch WT, et al Precepting humanism: strategies for fostering the human dimensions of care in ambulatory settings. <i>Acad Med.</i> 2005;80(1):21–28.                                                  | WRONG TARGET             |
| H.M. Swick, Professionalism and humanism beyond the academic healthcenter, <i>Acad. Med.</i> 82 (2007) 1022–1028.                                                                                                            | WRONG TARGET             |
| Meyer-Junco, L. (2015). Empathy and the new practitioner. <i>American Journal of Health-System Pharmacy</i> , 72(23), 2042-2058.                                                                                             | WRONG TARGET             |
| Hofmeyer, A., Taylor, R., & Kennedy, K. (2020). Fostering compassion and reducing burnout: How can health system leaders respond in the Covid-19 pandemic and beyond?. <i>Nurse education today</i> .                        | WRONG TARGET             |
| Nazir, O., & Islam, J. U. (2020). Effect of CSR activities on meaningfulness, compassion, and employee engagement: A sense-making theoretical approach. <i>International Journal of Hospitality Management</i> , 90, 102630. | WRONG TARGET             |



## PREDICTORS OF PHYSICIAN COMPASSION: A SYSTEMATIC REVIEW

### References

1. Patel S, Pelletier-Bui A, Smith S, Roberts MB, Kilgannon H, Trzeciak S, et al. Curricula for empathy and compassion training in medical education: a systematic review. *PLoS One*. 2019;14(8):e0221412.
2. Fernando III AT, Consedine NS. Beyond compassion fatigue: the transactional model of physician compassion. *Journal of pain and symptom management*. 2014;48(2):289-98.
3. Braker RL. *The social work dictionary* 5 ed. Washington, DC: NASW Press; 2003.
4. Geer JH, Estupinan LA, Manguno-Mire GM. Empathy, social skills, and other relevant cognitive processes in rapists and child molesters. *Aggression and violent behavior*. 2000;5(1):99-126.
5. Jazaieri H, Jinpa GT, McGonigal K, Rosenberg EL, Finkelstein J, Simon-Thomas E, et al. Enhancing compassion: A randomized controlled trial of a compassion cultivation training program. *Journal of Happiness Studies*. 2013;14(4):1113-26.
6. Hojat M, Mangione S, Nasca TJ, Cohen MJ, Gonnella JS, Erdmann JB, et al. The Jefferson Scale of Physician Empathy: development and preliminary psychometric data. *Educational and psychological measurement*. 2001;61(2):349-65.
7. Testerman JK, Morton KR, Loo LK, Worthley JS, Lamberton HH. The natural history of cynicism in physicians. *Acad Med*. 1996;71(10):S43-5.
8. Armijo-Olivo S, Stiles CR, Hagen NA, Biondo PD, Cummings GG. Assessment of study quality for systematic reviews: a comparison of the Cochrane Collaboration Risk of Bias Tool and the Effective Public Health Practice Project Quality Assessment Tool: methodological research. *Journal of evaluation in clinical practice*. 2012;18(1):12-8.
9. Aromataris E, Munn Z. *Joanna Briggs Institute Reviewer's Manual*. The Joanna Briggs Institute, 2017. 2020.
10. *Critical Appraisal Skills Programme. CASP Cohort Study Checklist* [online]. 2018.
11. NICE. *Methods for the development of NICE public health guidance*. 3 ed: NICE; 2012.
12. Von Elm E, Altman DG, Egger M, Pocock SJ, Gøtzsche PC, Vandenbroucke JP. The Strengthening the Reporting of Observational Studies in Epidemiology (STROBE) statement: guidelines for reporting observational studies. *Annals of internal medicine*. 2007;147(8):573-7.
13. Sterne J, Hernán M, McAleenan A, Higgins J, Thomas J, Chandler J. Chapter 25: Assessing risk of bias in a non-randomized study. *Cochrane Handbook for Systematic Reviews of Interventions* version 6. 0 (updated July 2019). Oxford: John Wiley & Sons, Ltd: Cochrane; 2019.
14. Atkins S, Lewin S, Smith H, Engel M, Fretheim A, Volmink J. Conducting a meta-ethnography of qualitative literature: lessons learnt. *BMC medical research methodology*. 2008;8(1):1-10.
15. Noyes J, Booth A, Cargo M, Flemming K, Harden A, Harris J, et al. Chapter 21: qualitative evidence. *Cochrane handbook for systematic reviews of interventions* Version. 2019;6.
16. Glenton C, Carlsen B, Lewin S, Munthe-Kaas H, Colvin CJ, Tunçalp Ö, et al. Applying GRADE-CERQual to qualitative evidence synthesis findings—paper 5: how to assess adequacy of data. *Implementation Science*. 2018;13(1):43-50.
17. Lewin S, Booth A, Glenton C, Munthe-Kaas H, Rashidian A, Wainwright M, et al. *Applying GRADE-CERQual to qualitative evidence synthesis findings: introduction to the series*. 2018.
18. Miller W, Crabtree BF. Qualitative analysis: how to begin making sense. *Family Practice Research Journal*. 1994;14(3):289-97.

## PREDICTORS OF PHYSICIAN COMPASSION: A SYSTEMATIC REVIEW

19. Sandelowski M, Barroso J, Voils CI. Using qualitative metasummary to synthesize qualitative and quantitative descriptive findings. *Research in nursing & health*. 2007;30(1):99-111.
20. Britten N, Campbell R, Pope C, Donovan J, Morgan M, Pill R. Using meta ethnography to synthesise qualitative research: a worked example. *Journal of health services research & policy*. 2002;7(4):209-15.
