# Supplementary material
Source: PubMed Central journal article supplement (PMC8904692)
Supplement: 11606_2021_7055_MOESM2_ESM.pdf [file 11606_2021_7055_MOESM2_ESM.pdf]

Table 1: Summary of findings

| Domain description                                                                  | Summary of review finding                                                                                                                                                                                                                   | Studies contributing to the review finding                                                                                                                                                                                                                                                                                                                                                                                                                                                                                                                                                                                                                                                                                                                                                                                                                                                                                                                                                                                                                                                                                                                                                                                                                                                                                                                                    |          |           | CERQual assessment                                                                                                                                                                                                                                                                                                                                                                                                                                                                                                                                                                                                                                                                                                                                                                                                                                                                                                                                                                                                                                                                                                                      |                                   |                                                                                                               |
|-------------------------------------------------------------------------------------|---------------------------------------------------------------------------------------------------------------------------------------------------------------------------------------------------------------------------------------------|-------------------------------------------------------------------------------------------------------------------------------------------------------------------------------------------------------------------------------------------------------------------------------------------------------------------------------------------------------------------------------------------------------------------------------------------------------------------------------------------------------------------------------------------------------------------------------------------------------------------------------------------------------------------------------------------------------------------------------------------------------------------------------------------------------------------------------------------------------------------------------------------------------------------------------------------------------------------------------------------------------------------------------------------------------------------------------------------------------------------------------------------------------------------------------------------------------------------------------------------------------------------------------------------------------------------------------------------------------------------------------|----------|-----------|-----------------------------------------------------------------------------------------------------------------------------------------------------------------------------------------------------------------------------------------------------------------------------------------------------------------------------------------------------------------------------------------------------------------------------------------------------------------------------------------------------------------------------------------------------------------------------------------------------------------------------------------------------------------------------------------------------------------------------------------------------------------------------------------------------------------------------------------------------------------------------------------------------------------------------------------------------------------------------------------------------------------------------------------------------------------------------------------------------------------------------------------|-----------------------------------|---------------------------------------------------------------------------------------------------------------|
|                                                                                     |                                                                                                                                                                                                                                             | Positive                                                                                                                                                                                                                                                                                                                                                                                                                                                                                                                                                                                                                                                                                                                                                                                                                                                                                                                                                                                                                                                                                                                                                                                                                                                                                                                                                                      | Negative | No effect | CERQual assessment of confidence in the evidence                                                                                                                                                                                                                                                                                                                                                                                                                                                                                                                                                                                                                                                                                                                                                                                                                                                                                                                                                                                                                                                                                        | Explanation of CERQual assessment |                                                                                                               |
| PHYSICIAN<br><br>(articles =133, quantitative =87, qualitative=39, mixed methods=7) | <b>Socio-demographic factors (N=75, quantitative=57, qualitative=14, mixed methods=4)</b>                                                                                                                                                   |                                                                                                                                                                                                                                                                                                                                                                                                                                                                                                                                                                                                                                                                                                                                                                                                                                                                                                                                                                                                                                                                                                                                                                                                                                                                                                                                                                               |          |           |                                                                                                                                                                                                                                                                                                                                                                                                                                                                                                                                                                                                                                                                                                                                                                                                                                                                                                                                                                                                                                                                                                                                         |                                   |                                                                                                               |
|                                                                                     | <b>Gender</b> (N=50, quantitative=46, qualitative*=1, mixed methods^=3): females seem to be more likely to be compassionate/empathetic; although the evidence is weak as there is similar number of studies showing no gender effect at all | <b>Females</b> (N=25: <a href="#">Dehning et al., 2014</a> ; <a href="#">Zandbelt et al., 2007</a> ; <a href="#">Zenasni et al., 2012</a> ; <a href="#">Hojat et al., 2002b</a> ; <a href="#">Bateman et al., 2017*</a> ; <a href="#">Julia-Sanchis et al., 2019</a> ; <a href="#">Kozeny &amp; Tisanska, 2013</a> ; <a href="#">Gleichgerrcht &amp; Decety, 2013</a> ; <a href="#">Wasserman et al., 1983</a> ; <a href="#">Kliszcz et al., 2006</a> ( <i>only empathetic concern</i> ); <a href="#">Bertakis, 2011</a> ; <a href="#">Suh et al., 2012</a> ; <a href="#">Cyrus et al., 2017</a> ; <a href="#">Alcorta-Garza et al., 2016</a> ; <a href="#">Chaitoff et al., 2017</a> ; <a href="#">Shariat, Eshtad &amp; Ansari, 2010</a> ; <a href="#">Pollak et al., 2007</a> ; <a href="#">Park et al., 2016</a> ; <a href="#">Paasche-Orlow &amp; Roter, 2003</a> ; <a href="#">Psyhojos, 2017</a> ; <a href="#">Cicekci et al., 2017</a> ; <a href="#">Bratek et al., 2015</a> ; <a href="#">Katsari et al., 2020</a> ; <a href="#">Bylund &amp; Makoul, 2002</a> ; <a href="#">Roberts et al., 2011</a> ) <sup>41, 43, 45, 47, 49, 52, 55, 58, 61, 64, 81-83, 92, 94, 95, 99, 101, 103, 108, 113-117</sup> , <b>males</b> (N=3: <a href="#">Jiao et al., 2014</a> ; <a href="#">Foo et al., 2017</a> ; <a href="#">Moralles et al., 2016</a> ) <sup>53, 111, 112</sup> |          |           | <b>No gender effect</b> (N=23: <a href="#">Moriarty et al., 2020</a> ; <a href="#">Charles et al., 2018</a> ; <a href="#">Clara et al., 2006</a> ; <a href="#">Shanafelt et al., 2005</a> ; <a href="#">Ferreira, Afons &amp; Ramos, 2020</a> ; <a href="#">Osim et al., 2019</a> ; <a href="#">Kondo et al., 2013</a> ; <a href="#">Kobayasi et al., 2018</a> <sup>^</sup> ; <a href="#">Kliszcz et al., 2006</a> ; <a href="#">Borracci et al., 2015</a> ; <a href="#">McFarland &amp; Roth, 2017</a> ; <a href="#">Wolfshohl et al., 2019</a> ; <a href="#">Hojat et al., 2002a</a> ; <a href="#">Petrahai &amp; Nwangwu, 2003</a> ; <a href="#">Jin et al., 2020</a> ; <a href="#">Saguem et al., 2020</a> ; <a href="#">Carmel &amp; Glick, 1996</a> ; <a href="#">Lee et al., 2018</a> ; <a href="#">Di Lillo et al., 2009</a> ; <a href="#">Walocha, Tomaszewska &amp; Mizia, 2013</a> ; <a href="#">Silvester et al., 2007</a> ; <a href="#">Street, Gordon &amp; Haidet, 2007</a> ; <a href="#">Brady, Bambury &amp; O'Reilly, 2015</a> ) <sup>39, 48, 50, 51, 54, 60, 72, 74, 76-80, 84, 86, 96, 105, 106, 116, 118-121</sup> | <b>Moderate confidence</b>        | Due to moderate concerns about methodological limitations and moderate concerns about coherence               |
|                                                                                     | <b>Age</b> (N=29, all quantitative): the evidence regarding the impact of age on ECRCs is conflicting and inconclusive, higher quality studies indicate either positive older age effect or no effect                                       | <b>Older age</b> (N=8: <a href="#">Charles et al., 2018</a> ; <a href="#">Clara et al., 2006</a> ; <a href="#">Julia-Sanchis et al., 2019</a> ( <i>only affective empathy</i> ); <a href="#">Osim et al., 2019</a> ; <a href="#">Handford et al., 2013</a> ; <a href="#">Ferreira, Afons &amp; Ramos, 2020</a> ; <a href="#">Shariat, Eshtad &amp; Ansari, 2010</a> ( <i>correlation</i> ); <a href="#">Walocha, Tomaszewska &amp; Mizia, 2013</a> ) <sup>39-41, 47, 51, 60, 84, 86</sup> , <b>younger age</b> (N=5: <a href="#">Julia-Sanchis et al., 2019</a> ( <i>only cognitive empathy</i> ); <a href="#">Kondo et al., 2013</a> ; <a href="#">Carmel &amp; Glick, 1996</a> ; <a href="#">Silvester et al., 2007</a> ; <a href="#">Pollak et al., 2007</a> ; <a href="#">Bratek et al., 2015</a> ) <sup>41, 49, 50, 54, 58, 120</sup>                                                                                                                                                                                                                                                                                                                                                                                                                                                                                                                                    |          |           | <b>No age effect</b> (N=15: <a href="#">Moriarty et al., 2020</a> ; <a href="#">Zenasni et al., 2012</a> ; <a href="#">Shanafelt et al., 2005</a> ; <a href="#">Kozeny &amp; Tisanska, 2013</a> ; <a href="#">Chaitoff et al., 2017</a> ; <a href="#">Shariat, Eshtad &amp; Ansari, 2010</a> ( <i>regression</i> ); <a href="#">Psyhojos, 2017</a> ; <a href="#">Avasarala, Whitehouse &amp; Drake, 2015</a> ; <a href="#">Cicekci et al., 2017</a> ; <a href="#">Katsari et al., 2020</a> ; <a href="#">Komisar &amp; McFarland, 2017</a> ; <a href="#">Yuguro et al., 2017</a> ; <a href="#">Jin et al., 2020</a> ; <a href="#">Lee et al., 2018</a> ; <a href="#">Street, Gordon &amp; Haidet, 2007</a> ) <sup>43, 47, 55, 72, 77, 80, 82, 95, 99, 106, 108, 121-124</sup> or <b>unclear</b> (N=2: <a href="#">Zandbelt et al., 2007</a> ; <a href="#">Petrahai &amp; Nwangwu, 2003</a> ) <sup>61, 74</sup>                                                                                                                                                                                                                          | <b>Low confidence</b>             | Due to serious concerns about methodological limitations and coherence, and moderate concerns about relevance |

Green - low or medium risk of bias/Blue - not enough information/ Black - high RoB

\* - qualitative study

^ - mixed methods

Table 1: Summary of findings

| Domain description | Summary of review finding                                                                                                                                                                                                                                                                           | Studies contributing to the review finding                                                                                                                                                                                                                                                                                                                                                                                                                                                                                                      |                                                                                                                                                                                                                                                                                                                                                                    |                                                                                                                                                                                                                                                                                                                                                                                                                                                                                                                                                                                                                                                                                                                                                                                              | CERQual assessment                               |                                                                                                                      |
|--------------------|-----------------------------------------------------------------------------------------------------------------------------------------------------------------------------------------------------------------------------------------------------------------------------------------------------|-------------------------------------------------------------------------------------------------------------------------------------------------------------------------------------------------------------------------------------------------------------------------------------------------------------------------------------------------------------------------------------------------------------------------------------------------------------------------------------------------------------------------------------------------|--------------------------------------------------------------------------------------------------------------------------------------------------------------------------------------------------------------------------------------------------------------------------------------------------------------------------------------------------------------------|----------------------------------------------------------------------------------------------------------------------------------------------------------------------------------------------------------------------------------------------------------------------------------------------------------------------------------------------------------------------------------------------------------------------------------------------------------------------------------------------------------------------------------------------------------------------------------------------------------------------------------------------------------------------------------------------------------------------------------------------------------------------------------------------|--------------------------------------------------|----------------------------------------------------------------------------------------------------------------------|
|                    |                                                                                                                                                                                                                                                                                                     | Positive                                                                                                                                                                                                                                                                                                                                                                                                                                                                                                                                        | Negative                                                                                                                                                                                                                                                                                                                                                           | No effect                                                                                                                                                                                                                                                                                                                                                                                                                                                                                                                                                                                                                                                                                                                                                                                    | CERQual assessment of confidence in the evidence | Explanation of CERQual assessment                                                                                    |
|                    | <p><b>Ethnicity/race/culture</b> (N=13, quantitative=10, qualitative*=3): ethnicity/race does not seem to be a factor clearly affecting physician ECRCs; however cultural understanding (or even possibly how the scales are read and completed) may be indicative of the perceived differences</p> | <p><b>White as compared to Asian/Pacific Islanders and other ethnicities</b> (N=1: Foo et al., 2017)<sup>112</sup>, <b>Spanish physicians as compared to Latin American physicians</b> (N=1: Alcorta-Garza et al., 2016)<sup>94</sup>, <b>US physicians as compared to Czech physicians</b> (N=1: Kozeny &amp; Tisanska, 2013)<sup>55</sup>, <b>empathy is facilitated when physicians have knowledge of the patients culture</b> (N=1: Kirmayer, 2008*)<sup>126</sup>, <b>local graduates</b> (N=1: Carmel &amp; Glick, 1996)<sup>50</sup></p> | <p><b>Physicians of "diverse background"</b> (N=1: Haider, Riaz &amp; Gill, 2020*)<sup>127</sup>, <b>certain cultural beliefs/norms preventing sharing emotion and matching emotion</b> (N=1: Epstein &amp; Borrelli, 2001*)<sup>125</sup>, <b>physicians on the South of the US are less empathetic than in the West</b> (N=1: Psychojos, 2017)<sup>108</sup></p> | <p><b>There were no differences between White and Black/African American and Black/African American and Asian (Pacific Islanders) &amp; Other ethnicities</b> (N=1: Foo et al., 2017)<sup>112</sup>, <b>no effect of ethnicity/race or country of origin</b> (N=6: Chaitoff et al., 2017; Pollak et al., 2007; Psychojos, 2017; Lee et al., 2018; Street, Gordon &amp; Haidet, 2007; Carmel &amp; Glick, 1996)<sup>50, 58, 72, 99, 108, 121</sup>, <b>physicians' year of immigration to the country they are practicing in (Israel)</b> (N=1: Carmel &amp; Glick, 1996)<sup>50</sup>, <b>physicians in the North and East of US compared to other regions and to themselves</b> (N=1: Psychojos, 2017)<sup>108</sup> or <b>unclear</b> (N=1: Petrahai &amp; Nwangwu, 2003)<sup>74</sup></p> | <p><b>Low confidence</b></p>                     | <p>Due to serious concerns about methodological limitations and coherence, and moderate concerns about relevance</p> |
|                    | <p><b>Religion, spirituality, and spiritual practice (e.g., meditation, reflection, prayer)</b> (N=5: quantitative=2, qualitative*=3): as indicated mostly by qualitative studies - spirituality may positively associate with ECRCs; there is insufficient evidence with regards to religion</p>   | <p><b>Spirituality and spiritual practice</b> (N= 3: Uygur, Brown &amp; Herbert, 2019*; Chou, Kellom &amp; Shea, 2014*; Anandarajah &amp; Roseman, 2014*)<sup>89, 131, 136</sup>, <b>meaning</b> (Anandarajah &amp; Roseman, 2014*)<sup>136</sup>, <b>religiosity</b> (N=1: Pawlikowski, Sak &amp; Marczewski, 2012)<sup>137</sup></p>                                                                                                                                                                                                          | <p><b>Religion</b> (N=1: Clara et al., 2006)<sup>137</sup></p>                                                                                                                                                                                                                                                                                                     | <p><b>Moderate confidence</b></p>                                                                                                                                                                                                                                                                                                                                                                                                                                                                                                                                                                                                                                                                                                                                                            |                                                  |                                                                                                                      |

Green - low or medium risk of bias/Blue - not enough information/ Black - high RoB

\* - qualitative study

^ - mixed methods

Table 1: Summary of findings

| Domain description | Summary of review finding                                                                                                                                                                                       | Studies contributing to the review finding                                                                                                                                                                                                                                                 |                                                                                                                                     |                                                                                                                                                                                                                                                                                                                                                   | CERQual assessment                               |                                                                                                               |
|--------------------|-----------------------------------------------------------------------------------------------------------------------------------------------------------------------------------------------------------------|--------------------------------------------------------------------------------------------------------------------------------------------------------------------------------------------------------------------------------------------------------------------------------------------|-------------------------------------------------------------------------------------------------------------------------------------|---------------------------------------------------------------------------------------------------------------------------------------------------------------------------------------------------------------------------------------------------------------------------------------------------------------------------------------------------|--------------------------------------------------|---------------------------------------------------------------------------------------------------------------|
|                    |                                                                                                                                                                                                                 | Positive                                                                                                                                                                                                                                                                                   | Negative                                                                                                                            | No effect                                                                                                                                                                                                                                                                                                                                         | CERQual assessment of confidence in the evidence | Explanation of CERQual assessment                                                                             |
|                    | <b>Marital status</b> (N=12, all quantitative): being married does not seem to associate with better or worse levels of empathy                                                                                 | <b>Being married</b> (N=3: Park et al., 2016; Katsari et al., 2020; Cyrus et al., 2017) <sup>43, 64, 83</sup>                                                                                                                                                                              |                                                                                                                                     | <b>No effect</b> (N=8: Osim et al., 2019; Shanafelt et al., 2005; Saguem et al., 2020; Shariat, Eshtad & Ansari, 2010; Hong et al., 2011; Carmel & Glick, 1996; Lee et al., 2018; Bratek et al., 2015) <sup>47, 49, 50, 63, 72, 76, 77, 86</sup> or <b>unclear</b> (N=1: Ferreira, Afons & Ramos, 2020) <sup>84</sup>                             | <b>Low confidence</b>                            | Due to serious concerns about relevance and moderate concerns about methodological limitations                |
|                    | <b>Children</b> (N=14, quantitative=11, qualitative*=3): it is inconclusive whether having children influences ECRCs, it is unlikely that having children can affect ECRCs negatively (except during residency) | <b>Having children</b> (N=5: Bateman et al., 2017*; Gottenborg et al., 2018*; Batley et al., 2016*; Julia-Sanchis et al., 2019 ( <i>affective empathy only</i> ); Park et al., 2016) <sup>41, 64, 113, 138, 139</sup> , <b>number of children</b> (N=1: Fulop et al., 2011) <sup>140</sup> | <b>Having children</b> (N=2: Foo et al., 2017; Moralle et al., 2016 ( <i>both studies - residents sample</i> )) <sup>111, 112</sup> | <b>Having children</b> (N=4: Shanafelt et al., 2005; Clara et al., 2006; Julia-Sanchis et al., 2019 ( <i>cognitive empathy</i> ); Bratek et al., 2015) <sup>39, 41, 49, 77</sup> , <b>number of children</b> (N=2: Zenasni et al., 2012; Lee et al., 2018) <sup>72, 82</sup> or <b>unclear</b> (N=1: Ferreira, Afons & Ramos, 2020) <sup>84</sup> | <b>Low confidence</b>                            | Due to serious concerns about relevance and coherence, and moderate concerns about methodological limitations |
|                    | <b>Upbringing</b> (N=3: quantitative=1; qualitative*=2) upbringing may influence how compassionate the physician is, however, the direction will most likely depend on the type of upbringing                   | <b>Depending on the type of upbringing it can have either positive or negative influence on compassion</b> (N=2: Uygur, Brown & Herbert, 2019*; Bateman et al., 2017*; Stratta, Riding & Baker, 2016) <sup>98, 113, 131</sup>                                                              |                                                                                                                                     | <b>Having relatives who are healthcare professionals</b> (N=1: Clara et al., 2006) <sup>39</sup>                                                                                                                                                                                                                                                  | <b>Low confidence</b>                            | Due to serious concerns about data adequacy, and moderate concerns about coherence                            |

Green - low or medium risk of bias/Blue - not enough information/ Black - high RoB

\* - qualitative study

^ - mixed methods

Table 1: Summary of findings

| Domain description | Summary of review finding                                                                                                                                                                                                                                                                                                                                                                    | Studies contributing to the review finding                                                                                                                                                                                                                                                                                                                                                                                                                                                                                                                                                                                               |                                                                                                                                                                                                                                                                       |                                                                                                                                                          | CERQual assessment                               |                                                                                                                   |
|--------------------|----------------------------------------------------------------------------------------------------------------------------------------------------------------------------------------------------------------------------------------------------------------------------------------------------------------------------------------------------------------------------------------------|------------------------------------------------------------------------------------------------------------------------------------------------------------------------------------------------------------------------------------------------------------------------------------------------------------------------------------------------------------------------------------------------------------------------------------------------------------------------------------------------------------------------------------------------------------------------------------------------------------------------------------------|-----------------------------------------------------------------------------------------------------------------------------------------------------------------------------------------------------------------------------------------------------------------------|----------------------------------------------------------------------------------------------------------------------------------------------------------|--------------------------------------------------|-------------------------------------------------------------------------------------------------------------------|
|                    |                                                                                                                                                                                                                                                                                                                                                                                              | Positive                                                                                                                                                                                                                                                                                                                                                                                                                                                                                                                                                                                                                                 | Negative                                                                                                                                                                                                                                                              | No effect                                                                                                                                                | CERQual assessment of confidence in the evidence | Explanation of CERQual assessment                                                                                 |
|                    | <b>Siblings</b> (N=2; both quantitative): there is insufficient evidence to make conclusions about sibling's effect on ECRCs                                                                                                                                                                                                                                                                 | <b>Having 2 or more siblings</b> (N=1: Park et al., 2016) <sup>64</sup>                                                                                                                                                                                                                                                                                                                                                                                                                                                                                                                                                                  |                                                                                                                                                                                                                                                                       | <b>Sibling rank</b> (N=1: Saguem et al., 2020) <sup>76</sup> , <b>being an only child</b> (N=1: Saguem et al., 2020) <sup>76</sup>                       | <b>Very low confidence</b>                       | Due to serious concerns in all domains                                                                            |
|                    | <b>Living situation</b> (N=4, all quantitative): there is insufficient evidence to make conclusions about living situation effect on ECRCs                                                                                                                                                                                                                                                   | <b>Living with extended family</b> (N=1: Kataoka et al., 2012) <sup>42</sup> , <b>living as a couple</b> (N=1: Zenasni et al., 2012) <sup>82</sup>                                                                                                                                                                                                                                                                                                                                                                                                                                                                                       |                                                                                                                                                                                                                                                                       | <b>Living extended family/elderly</b> (N=1: Clara et al., 2006) <sup>39</sup> , <b>employment of domestic help</b> (N=1: Lee et al., 2018) <sup>72</sup> | <b>Low confidence</b>                            | Due to serious concerns about methodological limitations and coherence, and moderate concerns about data adequacy |
|                    | <b>Past illness (of self or relative/child/colleague) and caregiving experience</b> (N=13: quantitative=4, qualitative*=6, mixed-methods^=3): it is likely that personal illness experience, relatives or own children illness experience, and caregiving experience associates with greater ECRCs; however, detachment can also happen to avoid being upset - countertransference is likely | <b>Personal illness experience</b> (N= 7: Uygur, Brown & Herbert, 2019*; Fox et al., 2009*; Jaye & Wilson, 2003*; Brady, Bambury & O'Reilly, 2015^; Roberts et al., 2011^; Woolf et al., 2007*; Pensek & Selic, 2018) <sup>45, 78, 128-132</sup> , <b>relative/own child illness experience</b> (N=5: Bateman et al., 2017*; Roberts et al., 2011^; Woolf et al., 2007*; Batton et al., 2011^; Krenek & Zalewski, 1993) <sup>45, 113, 132-134</sup> , <b>caregiving experience</b> (N=4: Uygur, Brown & Herbert, 2019*; Bateman et al., 2017*; Wohlgemuth, Auerbach & Parker, 2015*; Roberts et al., 2011^) <sup>45, 113, 131, 135</sup> | <b>Personal/relative illness experience and countertransference, which leads to detachment</b> (N=2: Fox et al., 2009*; Woolf et al., 2007*) <sup>128, 132</sup> , <b>colleagues' experience of being infected at work</b> (N=1: Pardeshi et al., 2017) <sup>88</sup> | <b>Own experience with psychotherapy</b> (N=1: Zenasni et al., 2012) <sup>82</sup>                                                                       | <b>Moderate confidence</b>                       | Due to serious concerns about methodological limitations, coherence, and data adequacy                            |

Green - low or medium risk of bias/Blue - not enough information/ Black - high RoB

\* - qualitative study

^ - mixed methods

Table 1: Summary of findings

| Domain description | Summary of review finding                                                                                                                                                                                                                                                                         | Studies contributing to the review finding                                                                                                                                                                                                                                                                                                                                                                                                                    |                                                                                                                                                                                                                                                                                                                                             |                                                                                                                                                                   | CERQual assessment                               |                                                                         |
|--------------------|---------------------------------------------------------------------------------------------------------------------------------------------------------------------------------------------------------------------------------------------------------------------------------------------------|---------------------------------------------------------------------------------------------------------------------------------------------------------------------------------------------------------------------------------------------------------------------------------------------------------------------------------------------------------------------------------------------------------------------------------------------------------------|---------------------------------------------------------------------------------------------------------------------------------------------------------------------------------------------------------------------------------------------------------------------------------------------------------------------------------------------|-------------------------------------------------------------------------------------------------------------------------------------------------------------------|--------------------------------------------------|-------------------------------------------------------------------------|
|                    |                                                                                                                                                                                                                                                                                                   | Positive                                                                                                                                                                                                                                                                                                                                                                                                                                                      | Negative                                                                                                                                                                                                                                                                                                                                    | No effect                                                                                                                                                         | CERQual assessment of confidence in the evidence | Explanation of CERQual assessment                                       |
|                    | <b>Quality of life (N=45, quantitative=22, qualitative=20, mixed methods=3)</b>                                                                                                                                                                                                                   |                                                                                                                                                                                                                                                                                                                                                                                                                                                               |                                                                                                                                                                                                                                                                                                                                             |                                                                                                                                                                   |                                                  |                                                                         |
|                    | <b>Overall quality of life</b> (N=2: quantitative)                                                                                                                                                                                                                                                | <b>Quality of Life</b> (N=1: Katsari et al., 2020) <sup>43</sup>                                                                                                                                                                                                                                                                                                                                                                                              |                                                                                                                                                                                                                                                                                                                                             | <b>Quality of Life</b> (N=1: Kemper et al., 2020) <sup>158</sup>                                                                                                  | <b>Very low confidence</b>                       | Due to serious concerns in all domains                                  |
|                    | <b>Private life and relationships</b> (N=8: quantitative=1, qualitative*=7): it is likely that good personal relationships and social support associate with ECRCs positively, while problems in personal life - negatively                                                                       | <b>Social support</b> (N=2: Derksen et al., 2016* (supportive family); Saguem et al., 2020 (greater number of people to provide support)) <sup>76, 149</sup> , <b>good relationships</b> (N=2: Swendiman et al., 2019* (with family and friends); Saguem et al., 2020 (with mother)) <sup>76, 90</sup> , <b>being free from private worries</b> (N=1: Derksen et al., 2015*) <sup>87</sup>                                                                    | <b>Current personal issues</b> (N=4: Branch et al., 2017*; Derksen et al., 2015* (negative feelings based on issues from the past), Derksen et al., 2018*; Uygur, Brown & Herbert, 2019* (marital issues)) <sup>87, 131, 146, 148</sup> , <b>loss of social interactions outside work</b> (N=1: Peng, Clarkin & Doja, 2018*) <sup>145</sup> | <b>Satisfaction with social support</b> (N=1: Saguem et al., 2020) <sup>76</sup> , <b>good relationships with father</b> (N=1: Saguem et al., 2020) <sup>76</sup> | <b>Moderate confidence</b>                       | Due to moderate concerns about data adequacy and relevance              |
|                    | <b>Work-related quality of life</b> (N=8: quantitative=3, qualitative*=5): satisfaction with work and work-life balance/integration may associate with increased ECRCs; however, there might be different aspects of satisfaction work which might be at play that will affect ECRCs differently. | <b>Satisfaction with work</b> (N=5: Charles et al., 2018 (intellectual stimulation, physician-patient relationships, interactions with colleagues); Picard et al., 2016*; Derksen et al., 2015*; Carmel & Glick, 1996; Gleichgerrcht & Decety, 2013 (compassion satisfaction)) <sup>50-52, 87, 93</sup> , <b>work-life balance/integration</b> (N=3: Swendiman et al., 2019*; Mills, Wand & Fraser, 2018*; Chou, Kellom & Shea, 2014*) <sup>89, 90, 155</sup> |                                                                                                                                                                                                                                                                                                                                             | <b>Satisfaction with work in the domains of economic profit and prestige</b> (N=1: Charles et al., 2018) <sup>51</sup>                                            | <b>Moderate confidence</b>                       | Due to moderate concerns about methodological limitations and coherence |

Green - low or medium risk of bias/Blue - not enough information/ Black - high RoB

\* - qualitative study

^ - mixed methods

Table 1: Summary of findings

| Domain description | Summary of review finding                                                                                                                                                                                                                                                                                          | Studies contributing to the review finding                                                                                                                                                                                                                                                                                           |                                                                                                                                                                                                                                                                                                                                                                                                      |                                                                                                                            | CERQual assessment                               |                                                                               |
|--------------------|--------------------------------------------------------------------------------------------------------------------------------------------------------------------------------------------------------------------------------------------------------------------------------------------------------------------|--------------------------------------------------------------------------------------------------------------------------------------------------------------------------------------------------------------------------------------------------------------------------------------------------------------------------------------|------------------------------------------------------------------------------------------------------------------------------------------------------------------------------------------------------------------------------------------------------------------------------------------------------------------------------------------------------------------------------------------------------|----------------------------------------------------------------------------------------------------------------------------|--------------------------------------------------|-------------------------------------------------------------------------------|
|                    |                                                                                                                                                                                                                                                                                                                    | Positive                                                                                                                                                                                                                                                                                                                             | Negative                                                                                                                                                                                                                                                                                                                                                                                             | No effect                                                                                                                  | CERQual assessment of confidence in the evidence | Explanation of CERQual assessment                                             |
|                    | <p><b>Leisure activities</b> (N=6: quantitative=2, qualitative*= 4) such as spending time with friends and family, time alone, taking holidays, travelling, and exercise; exposure to art, music, nature, literature, and other cultures. Having more leisure activities may be associated with greater ECRCs.</p> | <p><b>Leisure activities</b> (N=4: Ahrweiler et al., 2014*; Uygur, Brown &amp; Herbert, 2019*; Chou, Kellom &amp; Shea, 2014*; Anandarajah &amp; Roseman, 2014*)<sup>89, 131, 136, 153</sup>, <b>time off before medical school</b> (N=1: Moralle et al., 2016)<sup>111</sup></p>                                                    |                                                                                                                                                                                                                                                                                                                                                                                                      | <p><b>Leisure activities</b> (N=1: McManus et al., 2011)<sup>166</sup></p>                                                 | <p><b>Moderate confidence</b></p>                | <p>Due to moderate concerns about coherence and data adequacy</p>             |
|                    | <p><b>Self-care</b> (N=4, quantitative=1, qualitative*=3): self-care might be helpful in maintaining ECRCs, but the evidence is scarce, and self-care is not well-defined</p>                                                                                                                                      | <p><b>Self-care</b> (N=2: Mills, Wand &amp; Fraser, 2018*; Anandarajah &amp; Roseman, 2014* (<i>spiritual self-care such as mindfulness, reflection, breathing</i>)<sup>136, 155</sup> and <b>personal counseling</b> (N=1: Derksen et al., 2016*)<sup>149</sup></p>                                                                 | <p><b>Lack of time for spiritual practice</b> (N=1: Anandarajah &amp; Roseman, 2014*)<sup>136</sup></p>                                                                                                                                                                                                                                                                                              | <p><b>Weekend off</b> (N=1: Kemper et al., 2020)<sup>158</sup></p>                                                         | <p><b>Moderate confidence</b></p>                | <p>Due to moderate concerns about coherence, data adequacy, and relevance</p> |
|                    | <p><b>Current physical health</b> (N=15: quantitative=4, qualitative*=9, mixed methods^=2): feeling exhausted and tired might associate with lower levels of ECRCs</p>                                                                                                                                             | <p><b>Good subjective physical health</b> (level of fitness, general health, sleep, diet) (N=3: Derksen et al., 2015*; Uygur, Brown &amp; Herbert, 2019*; Mahoney, Sladek &amp; Neild, 2016^)<sup>87, 107, 131</sup>, <b>current physical health problems</b> (N=1: Roberts et al., 2011 (<i>only for females</i>))<sup>45</sup></p> | <p><b>Poor personal physical health</b> (exhaustion/tiredness/fatigue/lack of energy/reduced physical fitness) (N=7: Derksen et al., 2015*; 2016*; 2018* (<i>same sample</i>); Picard et al., 2016*; Ahrweiler et al., 2014*; Peng, Clarkin &amp; Doja, 2018*; Porthé et al., 2018*; Bayne et al., 2013*; Mahoney, Sladek &amp; Neild, 2016^)<sup>38, 87, 93, 107, 145, 146, 149, 153, 159</sup></p> | <p><b>Problems with sleep</b> (N=3: Rosen et al., 2006; Kemper et al., 2020; Passalacqua, 2011)<sup>68, 158, 163</sup></p> | <p><b>Moderate confidence</b></p>                | <p>Due to moderate concerns in all domains</p>                                |

Green - low or medium risk of bias/Blue - not enough information/ Black - high RoB

\* - qualitative study

^ - mixed methods

Table 1: Summary of findings

| Domain description | Summary of review finding                                                                                                                                                                | Studies contributing to the review finding                                                                                                                                                                                                                                                                                                                                                                                                                                                                                  |                                                                                                                                                                                                                                                                                                                                                                                                                                                                                                                                                                                                                                                                                                                                                                                                                                                                                                                                                                                                                                                                                                                                                                                                                                                                                                                                                                                                                                                                                                             |                                                                                                                                                                                                                                                                                                                                                                                                                                                                                                                                                                                                                                                                                                                                                                                                                                                                                                                                                                                                                                                                                                           | CERQual assessment                               |                                                                                                                                                    |
|--------------------|------------------------------------------------------------------------------------------------------------------------------------------------------------------------------------------|-----------------------------------------------------------------------------------------------------------------------------------------------------------------------------------------------------------------------------------------------------------------------------------------------------------------------------------------------------------------------------------------------------------------------------------------------------------------------------------------------------------------------------|-------------------------------------------------------------------------------------------------------------------------------------------------------------------------------------------------------------------------------------------------------------------------------------------------------------------------------------------------------------------------------------------------------------------------------------------------------------------------------------------------------------------------------------------------------------------------------------------------------------------------------------------------------------------------------------------------------------------------------------------------------------------------------------------------------------------------------------------------------------------------------------------------------------------------------------------------------------------------------------------------------------------------------------------------------------------------------------------------------------------------------------------------------------------------------------------------------------------------------------------------------------------------------------------------------------------------------------------------------------------------------------------------------------------------------------------------------------------------------------------------------------|-----------------------------------------------------------------------------------------------------------------------------------------------------------------------------------------------------------------------------------------------------------------------------------------------------------------------------------------------------------------------------------------------------------------------------------------------------------------------------------------------------------------------------------------------------------------------------------------------------------------------------------------------------------------------------------------------------------------------------------------------------------------------------------------------------------------------------------------------------------------------------------------------------------------------------------------------------------------------------------------------------------------------------------------------------------------------------------------------------------|--------------------------------------------------|----------------------------------------------------------------------------------------------------------------------------------------------------|
|                    |                                                                                                                                                                                          | Positive                                                                                                                                                                                                                                                                                                                                                                                                                                                                                                                    | Negative                                                                                                                                                                                                                                                                                                                                                                                                                                                                                                                                                                                                                                                                                                                                                                                                                                                                                                                                                                                                                                                                                                                                                                                                                                                                                                                                                                                                                                                                                                    | No effect                                                                                                                                                                                                                                                                                                                                                                                                                                                                                                                                                                                                                                                                                                                                                                                                                                                                                                                                                                                                                                                                                                 | CERQual assessment of confidence in the evidence | Explanation of CERQual assessment                                                                                                                  |
|                    | <b>Current mental health</b> (N=2, all quantitative): there is insufficient evidence whether one's mental health associates with ECRC                                                    | <b>Mental wellbeing</b> (N=1: <a href="#">Shanafelt et al., 2005</a> ) <sup>77</sup>                                                                                                                                                                                                                                                                                                                                                                                                                                        |                                                                                                                                                                                                                                                                                                                                                                                                                                                                                                                                                                                                                                                                                                                                                                                                                                                                                                                                                                                                                                                                                                                                                                                                                                                                                                                                                                                                                                                                                                             | <b>Anxiety</b> (N=1: Carmel & Glick, 1996) <sup>50</sup>                                                                                                                                                                                                                                                                                                                                                                                                                                                                                                                                                                                                                                                                                                                                                                                                                                                                                                                                                                                                                                                  | <b>Low confidence</b>                            | Due to serious concerns about methodological limitations, coherence, and data adequacy                                                             |
|                    | <b>Financial</b> (N=2, quantitative=1, qualitative*=1) there is insufficient evidence whether one's financial circumstances associate with ECRCs                                         |                                                                                                                                                                                                                                                                                                                                                                                                                                                                                                                             | <b>Financial worries</b> (N=1: <a href="#">Uygur, Brown &amp; Herbert, 2019</a> *) <sup>131</sup>                                                                                                                                                                                                                                                                                                                                                                                                                                                                                                                                                                                                                                                                                                                                                                                                                                                                                                                                                                                                                                                                                                                                                                                                                                                                                                                                                                                                           | <b>Student debt</b> (N=1: <a href="#">Shanafelt et al., 2005</a> ) <sup>77</sup>                                                                                                                                                                                                                                                                                                                                                                                                                                                                                                                                                                                                                                                                                                                                                                                                                                                                                                                                                                                                                          | <b>Very low confidence</b>                       | Due to serious concerns about coherence and data adequacy                                                                                          |
|                    | <b>Burnout and burnout subscales</b> (N=23, quantitative=17, qualitative*=5, mixed methods^=1): burnout negatively affects ECRCs, the evidence with relation to subscales is conflicting | <b>Personal accomplishment</b> (N=6: Yuguero et al., 2017; Reed et al., 2018; Park et al., 2016; Walocha et al., 2013; Fulop et al., 2011; <a href="#">Zenasni et al., 2012</a> ) <sup>64, 75, 82, 124, 140, 165</sup> , <b>emotional exhaustion</b> (N=2: Carmel & Glick, 1996; <a href="#">Julia-Sanchis et al., 2019</a> ( <i>affective empathy correlation</i> )) <sup>41, 50</sup> , <b>depersonalization</b> (N=1: <a href="#">Julia-Sanchis et al., 2019</a> ( <i>affective empathy correlation</i> )) <sup>41</sup> | <b>Burnout</b> (N=13: <a href="#">Kealy et al., 2016</a> ; <a href="#">Branch et al., 2017</a> *; <a href="#">Gilligan et al., 2019</a> *; <a href="#">Picard et al., 2016</a> *; <a href="#">Rawal, Strahlendorf &amp; Nimmon, 2020</a> *; <a href="#">Ferreira, Afons &amp; Ramos, 2020</a> ; <a href="#">Kemper et al., 2020</a> ; <a href="#">Passalacqua, 2011</a> ; <a href="#">Hayuni et al., 2019</a> ; <a href="#">Lyness, 1993</a> *; <a href="#">Salysers et al., 2015</a> ^; <a href="#">Yuguero et al., 2017</a> ; <a href="#">Walocha et al., 2013</a> ) <sup>65, 84, 93, 124, 147, 148, 158, 160-165</sup> and <b>secondary traumatic stress</b> (N=1: <a href="#">Hayuni et al., 2019</a> ) <sup>161</sup> , <b>depersonalization</b> (N= 8: <a href="#">Zenasni et al., 2012</a> ; <a href="#">Reed et al., 2018</a> ; <a href="#">Park et al., 2016</a> ; <a href="#">Lown, Shin &amp; Jones, 2019</a> ; <a href="#">Yuguero et al., 2017</a> ; <a href="#">Walocha et al., 2013</a> ; <a href="#">Fulop et al., 2011</a> ; <a href="#">Salysers et al., 2015</a> ^) <sup>57, 64, 75, 82, 124, 140, 164, 165</sup> , <b>emotional exhaustion</b> (N=4: <a href="#">Reed et al., 2018</a> ; <a href="#">Park et al., 2016</a> ; <a href="#">Walocha et al., 2013</a> ; <a href="#">Lown, Shin &amp; Jones, 2019</a> ) <sup>57, 64, 75, 165</sup> , <b>personal accomplishment</b> (N=1: <a href="#">Julia-Sanchis et al., 2019</a> ( <i>affective empathy correlation</i> )) <sup>41</sup> | <b>Burnout</b> (N=2: <a href="#">Gleichgerrcht &amp; Decety, 2013</a> ; <a href="#">McManus et al., 2011</a> ) <sup>52, 166</sup> , <b>emotional exhaustion</b> (N=6: <a href="#">Zenasni et al., 2012</a> ; <a href="#">Gleichgerrcht &amp; Decety, 2013</a> ; <a href="#">Yuguero et al., 2017</a> ; <a href="#">Salysers et al., 2015</a> ^; <a href="#">Fulop et al., 2011</a> ; <a href="#">Julia-Sanchis et al., 2019</a> ( <i>cognitive empathy correlation</i> )) <sup>41, 52, 82, 124, 140, 164</sup> , <b>personal accomplishment</b> (N=5: <a href="#">Gleichgerrcht &amp; Decety, 2013</a> ; <a href="#">Salysers et al., 2015</a> ^; <a href="#">Carmel &amp; Glick, 1996</a> ; <a href="#">Lown, Shin &amp; Jones, 2019</a> ; <a href="#">Julia-Sanchis et al., 2019</a> ( <i>cognitive empathy correlation</i> )) <sup>41, 50, 52, 57, 164</sup> , <b>depersonalization</b> (N=3: <a href="#">Gleichgerrcht &amp; Decety, 2013</a> ; <a href="#">Julia-Sanchis et al., 2019</a> ( <i>cognitive empathy correlation</i> ); <a href="#">Carmel &amp; Glick, 1996</a> ) <sup>41, 50, 52</sup> | <b>Moderate confidence</b>                       | Due to moderate concerns about relevance and methodological limitations; there were serious methodological limitations regarding burnout subscales |

Green - low or medium risk of bias/Blue - not enough information/ Black - high RoB

\* - qualitative study

^ - mixed methods

Table 1: Summary of findings

| Domain description | Summary of review finding                                                                                                                                                                                                                                                                                           | Studies contributing to the review finding                                            |                                                                                                                                                                                                                                                                                                                      |                                                            | CERQual assessment                               |                                                                                                                         |
|--------------------|---------------------------------------------------------------------------------------------------------------------------------------------------------------------------------------------------------------------------------------------------------------------------------------------------------------------|---------------------------------------------------------------------------------------|----------------------------------------------------------------------------------------------------------------------------------------------------------------------------------------------------------------------------------------------------------------------------------------------------------------------|------------------------------------------------------------|--------------------------------------------------|-------------------------------------------------------------------------------------------------------------------------|
|                    |                                                                                                                                                                                                                                                                                                                     | Positive                                                                              | Negative                                                                                                                                                                                                                                                                                                             | No effect                                                  | CERQual assessment of confidence in the evidence | Explanation of CERQual assessment                                                                                       |
|                    | <p><b>Compassion fatigue</b> (N=5: quantitative=1, qualitative*=4): there is insufficient evidence to conclude what role does compassion fatigue plays in ECRCs, it is also not clear whether compassion fatigue arises from the use of compassion or from something else (e.g., listening to problems, stress)</p> | <p><b>Compassion fatigue</b> (N=1: Gleichgerrcht &amp; Decety, 2013)<sup>52</sup></p> | <p><b>Compassion fatigue</b> (N=2: Rawal, Strahlendorf &amp; Nimmon, 2020*; Bessen et al., 2019*)<sup>65, 154</sup>, <b>fatigue from listening to problems</b> (N=1: Picard et al., 2016*)<sup>93</sup>, <b>becoming too distressed from patients stories</b> (N=1: Roze des Ordons et al., 2020*)<sup>167</sup></p> |                                                            | <p><b>Low confidence</b></p>                     | <p>Due to serious concerns about coherence and moderate concerns about methodological limitations and data adequacy</p> |
|                    | <p><b>Stress</b> (N=7: quantitative=2, qualitative*=5): qualitative data suggests that stress may associate negatively with ECRCs</p>                                                                                                                                                                               | <p><b>Stress</b> (N=1: Saguem et al., 2020)<sup>76</sup></p>                          | <p><b>Stress</b> (N=6: Uygur, Brown &amp; Herbert, 2019*; Roze des Ordons et al., 2020*; Branch et al., 2017; Gilligan et al., 2019*; Kemper et al., 2020; Stratta, Riding &amp; Baker, 2016*)<sup>98, 131, 148, 158, 160, 167</sup></p>                                                                             | <p><b>Stress</b> (N=1: Reed et al., 2018)<sup>75</sup></p> |                                                  |                                                                                                                         |

Green - low or medium risk of bias/Blue - not enough information/ Black - high RoB

\* - qualitative study

^ - mixed methods



Table 1: Summary of findings

| Domain description | Summary of review finding                                                                                                                                                                                                                                                     | Studies contributing to the review finding                                                                                                                                                                                                                                                                                                                                                                                                                                                                                                                                                                                                                                                                                                                                                                                                                                                                                                                                                                                                                                                                                                                                                                                                                                                                                                                                                                                                                                                                                                                                                                                                                                                                                                                                                                                                                                                                                                                                                                                                                                                                                                                                                                                                                                                                                                                                                                                                                                                                                                                                                                                                                                                                                                                                                 |                                                                                                                                                                                                                                                                                                                                                                                                                                                                                                                                                                                                                                                                                                                                                                     |                                                                                                                                                                                                                                                                                                                                                                                                                                                                                                                                                                                                                                                                                                                                                                                                                                                                                                                                                                                                                                                                                                                                                                                                                                                                                                                                                                                                                                                                                                                                                                                                                                                                                                                        | CERQual assessment                               |                                                                                                                     |
|--------------------|-------------------------------------------------------------------------------------------------------------------------------------------------------------------------------------------------------------------------------------------------------------------------------|--------------------------------------------------------------------------------------------------------------------------------------------------------------------------------------------------------------------------------------------------------------------------------------------------------------------------------------------------------------------------------------------------------------------------------------------------------------------------------------------------------------------------------------------------------------------------------------------------------------------------------------------------------------------------------------------------------------------------------------------------------------------------------------------------------------------------------------------------------------------------------------------------------------------------------------------------------------------------------------------------------------------------------------------------------------------------------------------------------------------------------------------------------------------------------------------------------------------------------------------------------------------------------------------------------------------------------------------------------------------------------------------------------------------------------------------------------------------------------------------------------------------------------------------------------------------------------------------------------------------------------------------------------------------------------------------------------------------------------------------------------------------------------------------------------------------------------------------------------------------------------------------------------------------------------------------------------------------------------------------------------------------------------------------------------------------------------------------------------------------------------------------------------------------------------------------------------------------------------------------------------------------------------------------------------------------------------------------------------------------------------------------------------------------------------------------------------------------------------------------------------------------------------------------------------------------------------------------------------------------------------------------------------------------------------------------------------------------------------------------------------------------------------------------|---------------------------------------------------------------------------------------------------------------------------------------------------------------------------------------------------------------------------------------------------------------------------------------------------------------------------------------------------------------------------------------------------------------------------------------------------------------------------------------------------------------------------------------------------------------------------------------------------------------------------------------------------------------------------------------------------------------------------------------------------------------------|------------------------------------------------------------------------------------------------------------------------------------------------------------------------------------------------------------------------------------------------------------------------------------------------------------------------------------------------------------------------------------------------------------------------------------------------------------------------------------------------------------------------------------------------------------------------------------------------------------------------------------------------------------------------------------------------------------------------------------------------------------------------------------------------------------------------------------------------------------------------------------------------------------------------------------------------------------------------------------------------------------------------------------------------------------------------------------------------------------------------------------------------------------------------------------------------------------------------------------------------------------------------------------------------------------------------------------------------------------------------------------------------------------------------------------------------------------------------------------------------------------------------------------------------------------------------------------------------------------------------------------------------------------------------------------------------------------------------|--------------------------------------------------|---------------------------------------------------------------------------------------------------------------------|
|                    |                                                                                                                                                                                                                                                                               | Positive                                                                                                                                                                                                                                                                                                                                                                                                                                                                                                                                                                                                                                                                                                                                                                                                                                                                                                                                                                                                                                                                                                                                                                                                                                                                                                                                                                                                                                                                                                                                                                                                                                                                                                                                                                                                                                                                                                                                                                                                                                                                                                                                                                                                                                                                                                                                                                                                                                                                                                                                                                                                                                                                                                                                                                                   | Negative                                                                                                                                                                                                                                                                                                                                                                                                                                                                                                                                                                                                                                                                                                                                                            | No effect                                                                                                                                                                                                                                                                                                                                                                                                                                                                                                                                                                                                                                                                                                                                                                                                                                                                                                                                                                                                                                                                                                                                                                                                                                                                                                                                                                                                                                                                                                                                                                                                                                                                                                              | CERQual assessment of confidence in the evidence | Explanation of CERQual assessment                                                                                   |
|                    |                                                                                                                                                                                                                                                                               | <b>Dispositional features (N=63, quantitative=29, qualitative=33, mixed methods=2)</b>                                                                                                                                                                                                                                                                                                                                                                                                                                                                                                                                                                                                                                                                                                                                                                                                                                                                                                                                                                                                                                                                                                                                                                                                                                                                                                                                                                                                                                                                                                                                                                                                                                                                                                                                                                                                                                                                                                                                                                                                                                                                                                                                                                                                                                                                                                                                                                                                                                                                                                                                                                                                                                                                                                     |                                                                                                                                                                                                                                                                                                                                                                                                                                                                                                                                                                                                                                                                                                                                                                     |                                                                                                                                                                                                                                                                                                                                                                                                                                                                                                                                                                                                                                                                                                                                                                                                                                                                                                                                                                                                                                                                                                                                                                                                                                                                                                                                                                                                                                                                                                                                                                                                                                                                                                                        |                                                  |                                                                                                                     |
|                    | <p><b>Personality/traits</b> (N=30: quantitative=22, qualitative*=8): it is likely that pro-social traits and ability to deal with and recognize one's emotions positively associate with ECRCs, whereas higher emotionality and idealism associate with ECRCs negatively</p> | <p><b>Empathic</b> (N=4: <a href="#">Picard et al., 2016*</a>; <a href="#">Shariat, Eshtad &amp; Ansari, 2010</a>; <a href="#">Kliszcz et al., 2006</a>; <a href="#">Hojat et al., 2005</a>)<sup>47, 93, 116, 141</sup> or <b>compassionate personality</b> (N=1: <a href="#">Gleichgerrcht &amp; Decety, 2013*</a>)<sup>52</sup>, <b>altruism</b> (N=1: <a href="#">Greenberg et al., 2015</a>)<sup>70</sup>, <b>humanistic attributes</b> (N=1: <a href="#">Mangione et al., 2002</a>)<sup>73</sup>, <b>perspective taking ability</b> (N=3: <a href="#">Saguem et al., 2020</a>, <a href="#">Greenberg et al., 2015</a>, <a href="#">Zenasni et al., 2012</a>)<sup>70, 76, 82</sup> and <b>ability to stand in patient's shoes</b> (N=1: <a href="#">Zenasni et al., 2012</a>)<sup>82</sup>, <b>interpersonal ease</b> (N=1: <a href="#">Bayne et al., 2013*</a>)<sup>38</sup>, <b>extraversion</b> (N=1: <a href="#">Handford et al., 2013</a>)<sup>40</sup>, <b>socio-emotional personality</b> (N=1: <a href="#">Pollak et al., 2007</a>)<sup>58</sup>, <b>emotional comfort</b> (N=1: <a href="#">Uygur, Brown &amp; Herbert, 2019*</a>)<sup>131</sup>, <b>emotional intelligence</b> (N=1: <a href="#">Kliszcz et al., 2006</a>)<sup>116</sup>, <b>emotional expression ability</b> (N=1: <a href="#">Scott, 2011</a>)<sup>144</sup>, <b>psychological capital</b> (N=1: <a href="#">Jin et al., 2020</a>)<sup>106</sup>, <b>interoceptive abilities</b> (N=1: <a href="#">Muslin &amp; Schlessinger, 1971*</a>)<sup>143</sup>, <b>resilience</b> (N=2: <a href="#">Reed et al., 2018</a>; <a href="#">Rawal, Strahlendorf &amp; Nimmon, 2020*</a>)<sup>65, 75</sup>, <b>persistence</b> (N=1: <a href="#">Hong et al., 2011</a>)<sup>63</sup>, <b>rationality</b> (N=1: <a href="#">Scott, 2011</a>)<sup>144</sup>, <b>confidence in providing compassionate care</b> (N=1: <a href="#">Kemper et al., 2020</a>)<sup>158</sup>, <b>self-esteem</b> (N=2: <a href="#">Carmel &amp; Glick, 1996</a>; <a href="#">Scott, 2011</a>)<sup>50, 144</sup>, <b>humility</b> (N=1: <a href="#">Chou, Kellom &amp; Shea, 2014*</a>)<sup>89</sup>, <b>humbleness</b> (N=1: <a href="#">Chou, Kellom &amp; Shea, 2014*</a>)<sup>89</sup>, <b>cooperativeness</b> (N=1: <a href="#">Hong et al., 2011</a>)<sup>63</sup>, <b>agreeableness</b> (N=1: <a href="#">Greenberg et al., 2015</a>)<sup>70</sup>, <b>interpersonal sensitivity</b> (N=1: <a href="#">Scott, 2011</a>)<sup>144</sup>, <b>like to be thanked</b> (N=1: <a href="#">Picard et al., 2016</a>)<sup>93</sup>, <b>curiosity</b> (N=1: <a href="#">Chou, Kellom &amp; Shea, 2014*</a>)<sup>89</sup>, <b>willingness to learn</b> (N=1: <a href="#">Chou, Kellom &amp; Shea, 2014*</a>)<sup>89</sup>, <b>fantasy ability</b></p> | <p><b>Alexithymia</b> (N=1: <a href="#">Gleichgerrcht &amp; Decety, 2013</a>)<sup>52</sup>, <b>lack of awareness for being empathetic</b> (N=1: <a href="#">Haider, Riaz &amp; Gill, 2020*</a>)<sup>127</sup>, <b>authoritarianism</b> (N=1: <a href="#">Bayne et al., 2013*</a>)<sup>38</sup>, <b>utilitarian moral judgement</b> (N=1: <a href="#">Santamaria-Garcia et al., 2017</a>)<sup>46</sup>, <b>idealism</b> (N=1: <a href="#">Peng, Clarkin &amp; Doja, 2018*</a>)<sup>145</sup>, <b>high achiever</b> (N=1: <a href="#">Peng, Clarkin &amp; Doja, 2018*</a>)<sup>145</sup>, <b>technical personality</b> (N=1: <a href="#">Pollak et al., 2007</a>)<sup>58</sup>, <b>high emotionality</b> (N=1: <a href="#">Picard et al., 2016*</a>)<sup>93</sup></p> | <p><b>Ability to stand in patient's shoes</b> (N=1: <a href="#">Greenberg et al., 2015</a>)<sup>70</sup>, <b>extraversion</b> (N=1: <a href="#">Greenberg et al., 2015</a>)<sup>70</sup>, <b>openness</b> (N=1: <a href="#">Greenberg et al., 2015</a>)<sup>70</sup>, <b>flexibility</b> (N=1: <a href="#">Scott, 2011</a>)<sup>144</sup>, <b>emotional stability</b> (N=1: <a href="#">Greenberg et al., 2015</a>)<sup>70</sup>, <b>emotion regulation</b> (N=2: <a href="#">Saguem et al., 2020</a>, <a href="#">Scott, 2011</a>)<sup>76, 144</sup>, <b>neuroticism</b> (N=1: <a href="#">Handford et al., 2013</a>)<sup>40</sup>, <b>self-perception (consultant, advisor, friend, protector)</b> (N=1: <a href="#">Scott, 2011</a>)<sup>144</sup>, <b>confidence</b> (N=1: <a href="#">Pollak et al., 2007</a>)<sup>58</sup>, <b>resilience</b> (N=3: <a href="#">McFarland &amp; Roth, 2017</a>)<sup>105</sup>, <b>conscientiousness</b> (N=1: <a href="#">Greenberg et al., 2015</a>)<sup>70</sup>, <b>self-directedness</b> (N=1: <a href="#">Hong et al., 2011</a>)<sup>63</sup>, <b>generalized self-efficacy</b> (N=1: <a href="#">Saguem et al., 2020</a>)<sup>76</sup>, <b>sense of power</b> (N=1: <a href="#">Greenberg et al., 2015</a>)<sup>70</sup>, <b>reward dependence</b> (N=1: <a href="#">Hong et al., 2011</a>)<sup>63</sup>, <b>harm avoidance</b> (N=1: <a href="#">Hong et al., 2011</a>)<sup>63</sup>, <b>novelty seeking</b> (N=1: <a href="#">Hong et al., 2011</a>)<sup>63</sup>, <b>self-transcendence</b> (N=1: <a href="#">Hong et al., 2011</a>)<sup>63</sup>, <b>increased interest in technology</b> (N=1: <a href="#">McFarland, Malone &amp; Roth, 2017</a>)<sup>104</sup>.</p> | <p><b>Low confidence</b></p>                     | <p>Due to serious concerns about coherence and moderate concerns about methodological limitations and relevance</p> |

Green - low or medium risk of bias/Blue - not enough information/ Black - high RoB

\* - qualitative study

^ - mixed methods

Table 1: Summary of findings

| Domain description | Summary of review finding                                                                                                                                                                                       | Studies contributing to the review finding                                                                                                                                                                                                                                                                                                                                                                                                                                                                                                                                                                                                                                                                                                                                                                              |                                                                                                                                                                                                                                                                                                                                                                               |                                                                             | CERQual assessment                               |                                                                        |
|--------------------|-----------------------------------------------------------------------------------------------------------------------------------------------------------------------------------------------------------------|-------------------------------------------------------------------------------------------------------------------------------------------------------------------------------------------------------------------------------------------------------------------------------------------------------------------------------------------------------------------------------------------------------------------------------------------------------------------------------------------------------------------------------------------------------------------------------------------------------------------------------------------------------------------------------------------------------------------------------------------------------------------------------------------------------------------------|-------------------------------------------------------------------------------------------------------------------------------------------------------------------------------------------------------------------------------------------------------------------------------------------------------------------------------------------------------------------------------|-----------------------------------------------------------------------------|--------------------------------------------------|------------------------------------------------------------------------|
|                    |                                                                                                                                                                                                                 | Positive                                                                                                                                                                                                                                                                                                                                                                                                                                                                                                                                                                                                                                                                                                                                                                                                                | Negative                                                                                                                                                                                                                                                                                                                                                                      | No effect                                                                   | CERQual assessment of confidence in the evidence | Explanation of CERQual assessment                                      |
|                    |                                                                                                                                                                                                                 | (N=1: Saguem et al., 2020) <sup>76</sup> , <b>high perceived control over patient outcomes</b> (N=1: Silvester et al., 2007) <sup>120</sup> , <b>difficulty engaging in goals when upset</b> (N=1 Saguem et al., 2020) <sup>76</sup> .                                                                                                                                                                                                                                                                                                                                                                                                                                                                                                                                                                                  |                                                                                                                                                                                                                                                                                                                                                                               |                                                                             |                                                  |                                                                        |
|                    | <b>Values</b> (N=10: all qualitative*): having empathy and compassion as a value may associate with increased ECRCs                                                                                             | <b>Empathy</b> (N=2: Lyness, 1993*; Stratta, Riding & Baker, 2016*) <sup>98, 147</sup> , <b>compassion</b> (N=1: Uygur, Brown & Herbert, 2019*) <sup>131</sup> , <b>humanistic values</b> (N=2: Branch et al., 2017*; Chou, Kellom & Shea, 2014*) <sup>89, 148</sup> , <b>equality</b> (N=1: Derksen et al., 2016*) <sup>149</sup> , <b>flexibility in assessment and treatment of patients based on individual and situational factors</b> (N=1: Bayne et al., 2013*) <sup>38</sup>                                                                                                                                                                                                                                                                                                                                    | <b>Objectivity, professionalism</b> (N=1: Derksen et al., 2016*) <sup>149</sup>                                                                                                                                                                                                                                                                                               |                                                                             | <b>Moderate confidence</b>                       | Due to moderate concerns about coherence, data adequacy, and relevance |
|                    | <b>Attitudes</b> (N=11: quantitative=4, qualitative*=7): positive or non-judgmental attitudes and respect might associate with greater ECRCs, prejudice and negative judgement might associate with lower ECRCs | <b>Being respectful</b> (N=2: Derksen et al., 2015*; Chou, Kellom & Shea, 2014* (of patient's needs)) <sup>87, 89</sup> , <b>positive judgement</b> (N=2: Batley et al., 2016* (non-judgmental attitude); Stratta, Riding & Baker, 2016* (positive value judgement of patients and their illness)) <sup>98, 138</sup> , <b>"you never know" attitude</b> (N=1: Batley et al., 2016*) <sup>138</sup> , <b>maintaining a professional and ethical attitude</b> (N=1: Batley et al., 2016*) <sup>138</sup> , <b>negative attitude towards cynicism</b> (N=1: Batley et al., 2016*) <sup>138</sup> , <b>patient-as-person approach</b> (N=1: Derksen et al., 2016*) <sup>149</sup> , <b>being genuine</b> (N=1: Derksen et al., 2015*) <sup>87</sup> , <b>prosocial attitudes</b> (N=1: Carmel & Glick, 1996) <sup>50</sup> | <b>Prejudice and negative value judgement of patients and their illness</b> (N=3: Derksen et al., 2018*; Stratta, Riding & Baker, 2016*; Moriarty et al., 2020 (negative attitudes towards self-harm)) <sup>80, 98, 146</sup> , <b>low trust</b> (N=1: Psychojos, 2017) <sup>108</sup> , <b>focusing on physical discomfort</b> (N=1: Lin, Hsu & Chong, 2008*) <sup>157</sup> | <b>Patient-centered attitude</b> (N=1: Zandbelt et al., 2007) <sup>61</sup> | <b>Moderate confidence</b>                       | Due to moderate concerns about data adequacy and relevance             |

Green - low or medium risk of bias/Blue - not enough information/ Black - high RoB

\* - qualitative study

^ - mixed methods

Table 1: Summary of findings

| Domain description | Summary of review finding                                                                                                                                                                                                                                                                                                                                                                                                                                                                                                                                                                                                       | Studies contributing to the review finding                                                                                                                                                                                                                                                                                                                                                                                                                                                                                                                                                                                                                                                                                                                                                                                                                                                                                                                                                                                                                                                                                                                                                                                                                                                                                                                                                                                                                                                                                                                                                                                                                                                                                                                                                                                                                                      |                                                                                                                                                                                                                                                                                                                                                                                                                                                                                                                                                                                                                                                                                                                                                                                                                                                                                                                                                                                                                                                                                                                                           |                                                                                                                                                                                                        | CERQual assessment                               |                                                     |
|--------------------|---------------------------------------------------------------------------------------------------------------------------------------------------------------------------------------------------------------------------------------------------------------------------------------------------------------------------------------------------------------------------------------------------------------------------------------------------------------------------------------------------------------------------------------------------------------------------------------------------------------------------------|---------------------------------------------------------------------------------------------------------------------------------------------------------------------------------------------------------------------------------------------------------------------------------------------------------------------------------------------------------------------------------------------------------------------------------------------------------------------------------------------------------------------------------------------------------------------------------------------------------------------------------------------------------------------------------------------------------------------------------------------------------------------------------------------------------------------------------------------------------------------------------------------------------------------------------------------------------------------------------------------------------------------------------------------------------------------------------------------------------------------------------------------------------------------------------------------------------------------------------------------------------------------------------------------------------------------------------------------------------------------------------------------------------------------------------------------------------------------------------------------------------------------------------------------------------------------------------------------------------------------------------------------------------------------------------------------------------------------------------------------------------------------------------------------------------------------------------------------------------------------------------|-------------------------------------------------------------------------------------------------------------------------------------------------------------------------------------------------------------------------------------------------------------------------------------------------------------------------------------------------------------------------------------------------------------------------------------------------------------------------------------------------------------------------------------------------------------------------------------------------------------------------------------------------------------------------------------------------------------------------------------------------------------------------------------------------------------------------------------------------------------------------------------------------------------------------------------------------------------------------------------------------------------------------------------------------------------------------------------------------------------------------------------------|--------------------------------------------------------------------------------------------------------------------------------------------------------------------------------------------------------|--------------------------------------------------|-----------------------------------------------------|
|                    |                                                                                                                                                                                                                                                                                                                                                                                                                                                                                                                                                                                                                                 | Positive                                                                                                                                                                                                                                                                                                                                                                                                                                                                                                                                                                                                                                                                                                                                                                                                                                                                                                                                                                                                                                                                                                                                                                                                                                                                                                                                                                                                                                                                                                                                                                                                                                                                                                                                                                                                                                                                        | Negative                                                                                                                                                                                                                                                                                                                                                                                                                                                                                                                                                                                                                                                                                                                                                                                                                                                                                                                                                                                                                                                                                                                                  | No effect                                                                                                                                                                                              | CERQual assessment of confidence in the evidence | Explanation of CERQual assessment                   |
|                    | <p><b>Beliefs/motivations/understanding</b> (N=18: quantitative=2, qualitative*=14, mixed methods^=2): positive beliefs about the importance of compassion/empathy in medical care (professional responsibility, outcomes), and motivation to maintain good standards of care and to get more job satisfaction from practicing compassion may positively associate with ECRCs; on a contrary, beliefs that compassion/empathy may negatively affect objectivity, mental health, or does not substitute an "action" may hinder ECRCs. The quality of evidence regarding negative contribution of negative beliefs is poorer.</p> | <p><b>Belief that compassion/empathy are a part of medical care/professional responsibility</b> (N=5: <a href="#">Aomatsu et al., 2013*</a>; <a href="#">Uygur, Brown &amp; Herbert, 2019*</a>; <a href="#">Swendiman et al., 2019*</a>; <a href="#">Lyness, 1993*</a>; <a href="#">Carmel &amp; Glick, 1996</a>)<sup>90, 90, 131, 142, 147</sup> and <b>motivation to maintain the good standards of care</b> (N=3: <a href="#">Chou, Kellom &amp; Shea, 2014*</a>, <a href="#">Swendiman et al., 2019*</a>, <a href="#">Derksen et al., 2016*</a>)<sup>89, 90, 149</sup>, <b>belief that compassion/empathy provide positive contribution to medical care</b> (efficiency, therapy adherence, receiving useful and detailed information, a better interpretation of complaints, improved diagnostics, connection with patients) (N=4: <a href="#">Uygur, Brown &amp; Herbert, 2019*</a>; <a href="#">Chou, Kellom &amp; Shea, 2014*</a>; <a href="#">Derksen et al., 2015*</a>; <a href="#">Bayne et al., 2013*</a>)<sup>38, 87, 89, 131</sup>, <b>understanding that difficult patients may be acting out of fear</b> (N=2: <a href="#">Aomatsu et al., 2013*</a>; <a href="#">Batley et al., 2016*</a>)<sup>138, 142</sup>, <b>motivation to have more satisfaction/energy/joy from work by practicing compassion</b> (N=3: <a href="#">Uygur, Brown &amp; Herbert, 2019*</a>; <a href="#">Chou, Kellom &amp; Shea, 2014*</a>; <a href="#">Branch et al., 2017*</a>)<sup>89, 131, 148</sup>, <b>urge towards service</b> (N=1: <a href="#">Anandarajah &amp; Roseman, 2014*</a>)<sup>136</sup>, <b>motivation to pass on values - being a role model</b> (N=1: <a href="#">Branch et al., 2017*</a>)<sup>148</sup>, <b>trying to understand empathy cognitively</b> (N=2: <a href="#">Aomatsu et al., 2013*</a>; <a href="#">Bayne et al., 2013*</a>)<sup>38, 142</sup></p> | <p><b>Belief that empathy negatively affects objectivity</b> (N=4: <a href="#">Stratta, Riding &amp; Baker, 2016*</a>; <a href="#">Lyness, 1993*</a>; <a href="#">Mahoney, Sladek &amp; Neild, 2016*</a>; <a href="#">Ross &amp; Indart, 2017*</a>)<sup>98, 107, 147, 150</sup>, <b>belief that being too empathetic can threaten own mental health</b> (N=1: <a href="#">Stratta, Riding &amp; Baker, 2016*</a>)<sup>98</sup>, <b>belief that patients' views often unrealistic, emotive, influenced by bias</b> (N=1: <a href="#">Mahoney, Sladek &amp; Neild, 2016*</a>)<sup>107</sup>, <b>belief that empathy does not solve medical problems</b> (N=1: <a href="#">Lyness, 1993*</a>)<sup>147</sup>, <b>in the context of incurable illness - hard to accept that just being there, not contributing anything specifically medical to the encounter</b> (N=1: <a href="#">Pinder, 1992*</a>)<sup>152</sup>, <b>motivation to please colleagues</b> (N=1: <a href="#">Peng, Clarkin &amp; Doja, 2018*</a>)<sup>145</sup>, <b>trying to understand empathy emotionally</b> (N=1: <a href="#">Bayne et al., 2013*</a>)<sup>38</sup></p> | <p><b>Belief that 'doctors' mode of communication differs radically from 'normal' communication... motivation for psychiatric training</b> (N=1: <a href="#">Saguem et al., 2020</a>)<sup>76</sup></p> | <p><b>Moderate confidence</b></p>                | <p>Due to moderate concerns about data adequacy</p> |

Green - low or medium risk of bias/Blue - not enough information/ Black - high RoB

\* - qualitative study

^ - mixed methods

Table 1: Summary of findings

| Domain description | Summary of review finding                                                                                                                                                                                     | Studies contributing to the review finding                                                                                                                                                                      |                                                                                                                                                                                                                                                                                                                                                                                                                                                                                                                                                                                                                                                                                                                                                                                                              |                                                                                                                                                                                                                          | CERQual assessment                               |                                                                                                |
|--------------------|---------------------------------------------------------------------------------------------------------------------------------------------------------------------------------------------------------------|-----------------------------------------------------------------------------------------------------------------------------------------------------------------------------------------------------------------|--------------------------------------------------------------------------------------------------------------------------------------------------------------------------------------------------------------------------------------------------------------------------------------------------------------------------------------------------------------------------------------------------------------------------------------------------------------------------------------------------------------------------------------------------------------------------------------------------------------------------------------------------------------------------------------------------------------------------------------------------------------------------------------------------------------|--------------------------------------------------------------------------------------------------------------------------------------------------------------------------------------------------------------------------|--------------------------------------------------|------------------------------------------------------------------------------------------------|
|                    |                                                                                                                                                                                                               | Positive                                                                                                                                                                                                        | Negative                                                                                                                                                                                                                                                                                                                                                                                                                                                                                                                                                                                                                                                                                                                                                                                                     | No effect                                                                                                                                                                                                                | CERQual assessment of confidence in the evidence | Explanation of CERQual assessment                                                              |
|                    | <p><b>Feelings/emotions</b> (N=16: quantitative=5, qualitative*=1): ECRC may be hindered by fear of overidentification, feelings of uncertainty and associated with it anxiety, and feelings of isolation</p> | <p><b>Distress</b> (N=2: Jin et al., 2020; Saguem et al., 2020)<sup>76, 106</sup>, <b>feeling privilege and humility to work with people who are vulnerable</b> (N=1: Swendiman et al., 2019*)<sup>90</sup></p> | <p><b>Fear of becoming too emotionally involved/overidentifying</b> (N=3: Derksen et al., 2016*; Batley et al., 2016*; Bayne et al., 2013*)<sup>38, 138, 149</sup>, <b>anxiety and feelings of uncertainty</b> (N=2: Baker et al., 2018*; Pinder, 1992*)<sup>151, 152</sup>, <b>feelings of isolation</b> (N=2: Anandarajah &amp; Roseman, 2014*; Peng, Clarkin &amp; Doja, 2018*)<sup>136, 145</sup>, <b>emotional difficulty with EOL</b> (N=1: Bessen et al., 2019*)<sup>154</sup>, <b>grief</b> (N=1: Peng, Clarkin &amp; Doja, 2018*)<sup>145</sup>, <b>fear of judgement or criticism</b> (N=1: Bayne et al., 2013*)<sup>38</sup>, <b>being afraid to ask open-ended questions</b> (N=1: Bishop et al., 2014*)<sup>168</sup>, <b>fear of contagion</b> (N=1: Battegay et al., 1991*)<sup>182</sup></p> | <p><b>Grief</b> (N=1: Hayuni et al., 2019)<sup>161</sup>, <b>mood or emotional state</b> (N=1: Pensek &amp; Selic, 2018)<sup>130</sup>, <b>distress</b> (N=1: Komisar &amp; McFarland, 2017 (unclear))<sup>123</sup></p> | <p><b>Moderate confidence</b></p>                | <p>Due to moderate concerns about methodological limitations, coherence, and data adequacy</p> |

Green - low or medium risk of bias/Blue - not enough information/ Black - high RoB

\* - qualitative study

^ - mixed methods

Table 1: Summary of findings

|  |                                                                                                                                                                                                                                                                                                                                                                                                                                                                                                                                                                                                             |                                                                                                                                                                                                                                                                                                                                                                                                                                                                                                                                                                                                                                                                                                                                                                                                                                                                                                                                                                                                                                                                                                                                                                                                                                                                                                                                                                                                                                                                                                                                                                                                                                                                                                                                                                                 |                                                                                                                                                                                                                                                                                                                                                                                                                                                                                                                                                                                                                                                                                                                                                                                                                                                                                                                                                                                                                                                                                                                                                                                                                                                                                                                                                                                                                                                                                                                                                                                                                                                                                                                                                                                                                                                                                                                                                                                                                                                                                                                                                                                                                                              |                                                                                                                                                                                                                  |                                   |                                                |
|--|-------------------------------------------------------------------------------------------------------------------------------------------------------------------------------------------------------------------------------------------------------------------------------------------------------------------------------------------------------------------------------------------------------------------------------------------------------------------------------------------------------------------------------------------------------------------------------------------------------------|---------------------------------------------------------------------------------------------------------------------------------------------------------------------------------------------------------------------------------------------------------------------------------------------------------------------------------------------------------------------------------------------------------------------------------------------------------------------------------------------------------------------------------------------------------------------------------------------------------------------------------------------------------------------------------------------------------------------------------------------------------------------------------------------------------------------------------------------------------------------------------------------------------------------------------------------------------------------------------------------------------------------------------------------------------------------------------------------------------------------------------------------------------------------------------------------------------------------------------------------------------------------------------------------------------------------------------------------------------------------------------------------------------------------------------------------------------------------------------------------------------------------------------------------------------------------------------------------------------------------------------------------------------------------------------------------------------------------------------------------------------------------------------|----------------------------------------------------------------------------------------------------------------------------------------------------------------------------------------------------------------------------------------------------------------------------------------------------------------------------------------------------------------------------------------------------------------------------------------------------------------------------------------------------------------------------------------------------------------------------------------------------------------------------------------------------------------------------------------------------------------------------------------------------------------------------------------------------------------------------------------------------------------------------------------------------------------------------------------------------------------------------------------------------------------------------------------------------------------------------------------------------------------------------------------------------------------------------------------------------------------------------------------------------------------------------------------------------------------------------------------------------------------------------------------------------------------------------------------------------------------------------------------------------------------------------------------------------------------------------------------------------------------------------------------------------------------------------------------------------------------------------------------------------------------------------------------------------------------------------------------------------------------------------------------------------------------------------------------------------------------------------------------------------------------------------------------------------------------------------------------------------------------------------------------------------------------------------------------------------------------------------------------------|------------------------------------------------------------------------------------------------------------------------------------------------------------------------------------------------------------------|-----------------------------------|------------------------------------------------|
|  | <p><b>Coping mechanisms and facilitative behaviors</b> (N=31: quantitative*=5, qualitative*=25, mixed methods^=1): it is evident that reflective practices such as personal or group reflection and mindfulness, and exploring emotions are likely to positively associate with ECRCs, additionally practicing compassion will likely increase future compassion. Doubting or criticizing oneself, on a contrary, will likely associate with ECRC negatively; lack of positive coping strategies and defense mechanisms such as detachment, avoidance, hiding emotions will likely result in lower ECRC</p> | <p><b>Self- or group reflection/reflexivity</b> (N=8: Derksen et al., 2015*; Chou, Kellom &amp; Shea, 2014*; Swendiman et al., 2019*; Davidsen &amp; Fosgerau, 2014*; Ahrweiler et al., 2014*; Woolf et al., 2007*; Pinder, 1992*; Stratta, Riding &amp; Baker, 2016*)<sup>87, 89, 90, 98, 100, 132, 152, 153</sup>, <b>self-awareness</b> (N=5: Uygur, Brown &amp; Herbert, 2019*; Derksen et al., 2015*; Bessen et al., 2019*; Stratta, Riding &amp; Baker, 2016*; Muslin &amp; Schlessinger, 1971*)<sup>87, 98, 131, 143, 154</sup>, <b>mindfulness</b> (N=2: Branch et al., 2017*; Reed et al., 2018)<sup>75, 148</sup>, <b>a habit of connecting with patients</b> (N=2: Chou, Kellom &amp; Shea, 2014*; Swendiman et al., 2019*)<sup>89, 90</sup>, <b>practicing and getting inspiration from compassion/empathy</b> (that leads to inspiration and more compassion) (N=2: Uygur, Brown &amp; Herbert, 2019*; Bayne et al., 2013*)<sup>38, 131</sup>, <b>humor</b> (N=2: Mahoney, Sladek &amp; Neild; 2016^, Stratta, Riding &amp; Baker, 2016*)<sup>98, 107</sup>, <b>having realistic expectations</b> (N=1: Swendiman et al., 2019*)<sup>90</sup>, <b>talking about/exploration of doubts and emotions</b> (N=2: Derksen et al., 2015*; Davidsen &amp; Fosgerau, 2014*)<sup>87, 100</sup>, <b>imagining self or family going through the same experience</b> (N=1: Branch et al., 2017*)<sup>148</sup>, <b>finding meaning in working with dying patients</b> (N=1: Komisar &amp; McFarland , 2017)<sup>123</sup>, <b>not focusing on achievement</b> (N=1: Swendiman et al., 2019*)<sup>90</sup>, <b>self-control</b> (N=1: Scott, 2011)<sup>144</sup>, <b>setting limits on schedules/negotiating control</b> (N=1: Chou, Kellom &amp; Shea, 2014*)<sup>89</sup></p> | <p><b>Self-criticism</b> (N=1: Mills, Wand &amp; Fraser, 2018*)<sup>155</sup>, <b>self-doubt</b> (N=1: Lyness, 1993*)<sup>147</sup>, <b>self-stigma for being inadequate</b> (N=1: Peng, Clarkin &amp; Doja, 2018*)<sup>145</sup>, <b>overidentification with the patient</b> (N=2: Picard et al., 2016*; Bessen et al., 2019*)<sup>93, 154</sup>, <b>self-protection</b> (N=1: Picard et al., 2016*)<sup>93</sup>, <b>trying to find balance</b> (N=2: Picard et al., 2016*; Batley et al., 2016*)<sup>93, 138</sup>, <b>restricting amount of empathy</b> (N=1: Batley et al., 2016*)<sup>138</sup>, <b>detachment/setting boundaries</b> (N=6: Batley et al., 2016*; Lin, Hsu &amp; Chong, 2008*; Bayne et al., 2013*; Derksen et al., 2016*; Mahoney, Sladek &amp; Neild, 2016*; Woolf et al., 2007)<sup>38, 107, 132, 138, 149, 157</sup>, <b>avoidance of certain conversations, situations/hiding emotional vulnerability</b> (changing subject, token empathy) (N= 4: Crowe &amp; Brugha, 2018*; Davidsen &amp; Fosgerau, 2014*; Lin, Hsu &amp; Chong, 2008*; Bessen et al., 2019*)<sup>100, 154, 156, 157</sup>, <b>objectification</b> (N=1: Picard et al., 2016*)<sup>93</sup>, <b>rationalizing</b> (N=1: Davidsen &amp; Fosgerau, 2014*)<sup>100</sup>, <b>habituation</b> (N=3: Aomatsu et al., 2013*; Picard et al., 2016*; Stratta, Riding &amp; Baker, 2016*)<sup>93, 98, 142</sup>, <b>humor</b> (N=2: Mahoney, Sladek &amp; Neild, 2016^; Stratta, Riding &amp; Baker, 2016*)<sup>98, 107</sup>, <b>loss of interest</b> (N=1: Picard et al., 2016*)<sup>93</sup>, <b>lack of coping strategy/ poor coping mechanisms</b> (N=2: Picard et al., 2016*; Rawal, Strahlendorf &amp; Nimmon, 2020*)<sup>65, 93</sup>, <b>lack of reflection</b> (N=2: Lin, Hsu &amp; Chong, 2008*; Haider, Riaz &amp; Gill, 2020*)<sup>127, 157</sup>, <b>lack of self-awareness/attention to extend compassion</b> (N=1: Roze des Ordonns et al., 2020*)<sup>167</sup>, <b>quasi-Stockholm Syndrome, where residents downplay, excuse, or even support the negative aspects of being a resident all while their quality of life suffers</b> (hardship as desirable part of training) (N=1: Peng, Clarkin &amp; Doja, 2018*)<sup>145</sup></p> | <p><b>Self-compassion</b> (N=2: Kemper et al., 2020; Reed et al., 2018)<sup>75, 158</sup>, <b>mindfulness</b> (N=1: Reed et al., 2018)<sup>75</sup>, <b>alcohol use</b> (N=1: Lee et al., 2018)<sup>72</sup></p> | <p><b>Moderate confidence</b></p> | <p>Due to moderate concerns in all domains</p> |
|--|-------------------------------------------------------------------------------------------------------------------------------------------------------------------------------------------------------------------------------------------------------------------------------------------------------------------------------------------------------------------------------------------------------------------------------------------------------------------------------------------------------------------------------------------------------------------------------------------------------------|---------------------------------------------------------------------------------------------------------------------------------------------------------------------------------------------------------------------------------------------------------------------------------------------------------------------------------------------------------------------------------------------------------------------------------------------------------------------------------------------------------------------------------------------------------------------------------------------------------------------------------------------------------------------------------------------------------------------------------------------------------------------------------------------------------------------------------------------------------------------------------------------------------------------------------------------------------------------------------------------------------------------------------------------------------------------------------------------------------------------------------------------------------------------------------------------------------------------------------------------------------------------------------------------------------------------------------------------------------------------------------------------------------------------------------------------------------------------------------------------------------------------------------------------------------------------------------------------------------------------------------------------------------------------------------------------------------------------------------------------------------------------------------|----------------------------------------------------------------------------------------------------------------------------------------------------------------------------------------------------------------------------------------------------------------------------------------------------------------------------------------------------------------------------------------------------------------------------------------------------------------------------------------------------------------------------------------------------------------------------------------------------------------------------------------------------------------------------------------------------------------------------------------------------------------------------------------------------------------------------------------------------------------------------------------------------------------------------------------------------------------------------------------------------------------------------------------------------------------------------------------------------------------------------------------------------------------------------------------------------------------------------------------------------------------------------------------------------------------------------------------------------------------------------------------------------------------------------------------------------------------------------------------------------------------------------------------------------------------------------------------------------------------------------------------------------------------------------------------------------------------------------------------------------------------------------------------------------------------------------------------------------------------------------------------------------------------------------------------------------------------------------------------------------------------------------------------------------------------------------------------------------------------------------------------------------------------------------------------------------------------------------------------------|------------------------------------------------------------------------------------------------------------------------------------------------------------------------------------------------------------------|-----------------------------------|------------------------------------------------|

Green - low or medium risk of bias/Blue - not enough information/ Black - high RoB

\* - qualitative study

^ - mixed methods

Table 1: Summary of findings

| Domain description | Summary of review finding                                                                                                                                                                                                                                                                                                                                                                                                                     | Studies contributing to the review finding                                                                                                                                                                                                                                                                                                                                                                                                                                                                                                                                                                                                                                                                                                                                                                                                                                                                                                                                                                                                                                                                                                                                                                                                                                                                                                                                                                     |                                                                                                                                                                                                                                                                                                                                                                                                                                                                                                                                                                                                                                                                                                                                                                                                                                                                                                                                                                                                                                                                                                                                                                                                                                                                                                     |                                                                                                                                                                                                                                                                                                                                                                                                                                                                                                                                                                                                                                                                                                                                                                                                                                                                                                                                                                                                                                                                                                                                                                                                                                                                                                                                                                                                                                                                                                                                                                                                                                                                                                                                                                                                                                                                                                        | CERQual assessment                               |                                                                               |
|--------------------|-----------------------------------------------------------------------------------------------------------------------------------------------------------------------------------------------------------------------------------------------------------------------------------------------------------------------------------------------------------------------------------------------------------------------------------------------|----------------------------------------------------------------------------------------------------------------------------------------------------------------------------------------------------------------------------------------------------------------------------------------------------------------------------------------------------------------------------------------------------------------------------------------------------------------------------------------------------------------------------------------------------------------------------------------------------------------------------------------------------------------------------------------------------------------------------------------------------------------------------------------------------------------------------------------------------------------------------------------------------------------------------------------------------------------------------------------------------------------------------------------------------------------------------------------------------------------------------------------------------------------------------------------------------------------------------------------------------------------------------------------------------------------------------------------------------------------------------------------------------------------|-----------------------------------------------------------------------------------------------------------------------------------------------------------------------------------------------------------------------------------------------------------------------------------------------------------------------------------------------------------------------------------------------------------------------------------------------------------------------------------------------------------------------------------------------------------------------------------------------------------------------------------------------------------------------------------------------------------------------------------------------------------------------------------------------------------------------------------------------------------------------------------------------------------------------------------------------------------------------------------------------------------------------------------------------------------------------------------------------------------------------------------------------------------------------------------------------------------------------------------------------------------------------------------------------------|--------------------------------------------------------------------------------------------------------------------------------------------------------------------------------------------------------------------------------------------------------------------------------------------------------------------------------------------------------------------------------------------------------------------------------------------------------------------------------------------------------------------------------------------------------------------------------------------------------------------------------------------------------------------------------------------------------------------------------------------------------------------------------------------------------------------------------------------------------------------------------------------------------------------------------------------------------------------------------------------------------------------------------------------------------------------------------------------------------------------------------------------------------------------------------------------------------------------------------------------------------------------------------------------------------------------------------------------------------------------------------------------------------------------------------------------------------------------------------------------------------------------------------------------------------------------------------------------------------------------------------------------------------------------------------------------------------------------------------------------------------------------------------------------------------------------------------------------------------------------------------------------------------|--------------------------------------------------|-------------------------------------------------------------------------------|
|                    |                                                                                                                                                                                                                                                                                                                                                                                                                                               | Positive                                                                                                                                                                                                                                                                                                                                                                                                                                                                                                                                                                                                                                                                                                                                                                                                                                                                                                                                                                                                                                                                                                                                                                                                                                                                                                                                                                                                       | Negative                                                                                                                                                                                                                                                                                                                                                                                                                                                                                                                                                                                                                                                                                                                                                                                                                                                                                                                                                                                                                                                                                                                                                                                                                                                                                            | No effect                                                                                                                                                                                                                                                                                                                                                                                                                                                                                                                                                                                                                                                                                                                                                                                                                                                                                                                                                                                                                                                                                                                                                                                                                                                                                                                                                                                                                                                                                                                                                                                                                                                                                                                                                                                                                                                                                              | CERQual assessment of confidence in the evidence | Explanation of CERQual assessment                                             |
|                    |                                                                                                                                                                                                                                                                                                                                                                                                                                               | <b>Professional factors (N=86, quantitative=72, qualitative=11, mixed methods=3)</b>                                                                                                                                                                                                                                                                                                                                                                                                                                                                                                                                                                                                                                                                                                                                                                                                                                                                                                                                                                                                                                                                                                                                                                                                                                                                                                                           |                                                                                                                                                                                                                                                                                                                                                                                                                                                                                                                                                                                                                                                                                                                                                                                                                                                                                                                                                                                                                                                                                                                                                                                                                                                                                                     |                                                                                                                                                                                                                                                                                                                                                                                                                                                                                                                                                                                                                                                                                                                                                                                                                                                                                                                                                                                                                                                                                                                                                                                                                                                                                                                                                                                                                                                                                                                                                                                                                                                                                                                                                                                                                                                                                                        |                                                  |                                                                               |
|                    | <p><b>Specialties/satisfaction with career</b> (N=39, quantitative=33, qualitative*=3, mixed methods^=3): it is possible that physicians in patient-centered/relational specialties are more compassionate/empathetic than in specialties that are technology-orientated, although the evidence with regards to particular specialties is mixed, and there is a high number of studies showing that specialty is not a significant factor</p> | <p><b>Patient-centered specialties/physicians with relational interest in the job</b> (N=4: <a href="#">Hojat et al., 2002b</a>; <a href="#">Picard et al., 2016*</a>; Park et al., 2016; Kataoka et al., 2012)<sup>42, 64, 92, 93</sup>, <b>mental health physicians/psychiatrists</b> (N=4: Chaitoff et al., 2017; Roberts et al., 2011^; Hojat et al., 2002a; <a href="#">Khajavi &amp; Hekmat, 1971</a>; Santamaria-Garcia et al., 2017)<sup>45, 46, 71, 96, 99</sup>, <b>GPs/family medicine</b> (N=3: <a href="#">Davidsen &amp; Fosgerau, 2014</a>; Sandikci et al., 2017; Bertakis, 2011)<sup>100-102</sup>, <b>internal medicine</b> (N=3: Cicekci et al., 2017; Suh et al., 2012; Carmel &amp; Glick, 1996)<sup>50, 81, 95</sup>, <b>pediatrics</b> (N=2: Chaitoff et al., 2017, Carmel &amp; Glick, 1996)<sup>50, 99</sup>, <b>obstetrics-gynecology</b> (N=2: Chaitoff et al., 2017; Cyrus et al., 2017)<sup>83, 99</sup>, <b>dermatology</b> (N=1: Suh et al., 2012)<sup>81</sup>, <b>rehabilitation physicians</b> (N=1: Suh et al., 2012)<sup>81</sup>, <b>surgery</b> (N=1: Chaitoff et al., 2017 (<i>thoracic</i>))<sup>99</sup>, <b>non-hospital specialties</b> (N=1: Alcorta-Garza et al., 2016)<sup>94</sup>, <b>non-surgical specialties</b> (N=1: Walocha et al., 2013)<sup>60</sup>, <b>physicians satisfied with their career choice</b> (N=1: Kemper et al., 2020)<sup>158</sup></p> | <p><b>Technology-centered specialties</b> (N=3: <a href="#">Hojat et al., 2002b</a>; Kataoka et al., 2012; Park et al., 2016)<sup>42, 64, 92</sup>, <b>surgical</b> (N=7: <a href="#">Khajavi &amp; Hekmat, 1971</a>; <a href="#">Stanton et al., 2011</a>; Stratta, Riding &amp; Baker, 2016*; Hojat et al., 2002a; Walocha et al., 2013; Alcorta-Garza et al., 2016; Cicekci et al., 2017)<sup>60, 71, 94-98</sup>, <b>radiology</b> (N=2: Suh et al., 2012; Hojat et al., 2002a)<sup>81, 96</sup>, <b>anesthesiology</b> (N=2: Cicekci et al., 2017; Hojat et al., 2002a)<sup>95, 96</sup>, <b>internal medicine</b> (N=4: Chaitoff et al., 2017; Paasche-Orlow &amp; Roter, 2003; Cyrus et al., 2017; Bertakis, 2011)<sup>83, 99, 101, 103</sup>, <b>GPs/family medicine</b> (N=3: Suh et al., 2012; Santamaria-Garcia et al., 2017; Roberts et al., 2011^)<sup>45, 46, 81</sup>, <b>psychiatry</b> (N=1: <a href="#">Davidsen &amp; Fosgerau, 2014*</a>)<sup>100</sup>, <b>obstetrics-gynecology</b> (N=1: Hojat et al., 2002a)<sup>96</sup>, <b>emergency medicine</b> (N=1: Cyrus et al., 2017)<sup>83</sup>, <b>hematology-oncology rotations</b> (N=2: McFarland &amp; Roth, 2017 (<i>only for females</i>); McFarland, Malone &amp; Roth, 2017 (<i>IRI total</i>))<sup>104, 105</sup></p> | <p><b>Not specialty effect</b> (N=6: <a href="#">Zandbelt et al., 2007</a>; <a href="#">Kondo et al., 2013</a>; <a href="#">Psyhojos, 2017</a>; Jin et al., 2020; Mahoney, Sladek &amp; Neild, 2016^; Brady, Bambury &amp; O'Reilly, 2015^)<sup>54, 61, 78, 106-108</sup>, <b>medical vs surgical specialty</b> (N=4: Lee et al., 2018; Di Lillo et al., 2009; Foo et al., 2017; Moralle et al., 2016)<sup>72, 79, 111, 112</sup>, <b>surgery</b> (N=1: Cicekci et al., 2017)<sup>95</sup>, <b>primary vs non primary care</b> (N=1: Avasarala, Whitehouse &amp; Drake, 2015)<sup>122</sup>, <b>GPs/family medicine</b> (N=1: Hojat et al., 2002a)<sup>96</sup>, <b>correctional vs non-correctional</b> (N=1: Dhawan, Steinbach &amp; Halpern, 2007)<sup>109</sup>, <b>mental health professionals vs non-mental health professional</b> (N=1: Gatheshill, Kucharska-Pietura &amp; Wattis, 2011 (<i>empathy towards patients with mental disorders</i>))<sup>110</sup>, <b>emergency medicine</b> (N=3: Cicekci et al., 2017; Kataoka et al., 2012; Hojat et al., 2002a)<sup>42, 95, 96</sup>, <b>internal medicine</b> (N=1: Hojat et al., 2002a)<sup>96</sup>, <b>pediatrics</b> (N=1: Hojat et al., 2002a)<sup>96</sup>, <b>pulmonology</b> (N=1: Cicekci et al., 2017)<sup>95</sup>, <b>rehabilitation medicine</b> (N=1: Kataoka et al., 2012)<sup>42</sup>, <b>ophthalmology</b> (N=1: Foo et al., 2017)<sup>112</sup>, <b>hematology-oncology rotations</b> (N=2: McFarland &amp; Roth, 2017 (<i>only for males</i>); McFarland, Malone &amp; Roth, 2017 (<i>empathic concern</i>))<sup>104, 105</sup>, <b>public health</b> (N=1: Kataoka et al., 2012)<sup>42</sup>, <b>satisfaction with career choice/vocational engagement</b> (N=1: McManus et al., 2011)<sup>166</sup>, <b>job prestige</b> (N=2: <a href="#">Charles et al., 2018</a>; Carmel &amp; Glick, 1996)<sup>50, 51</sup>.</p> | <p><b>Low confidence</b></p>                     | <p>Due to serious concerns about methodological limitations and coherence</p> |

Green - low or medium risk of bias/Blue - not enough information/ Black - high RoB

\* - qualitative study

^ - mixed methods

Table 1: Summary of findings

| Domain description | Summary of review finding                                                                                                                                                                                                                                                                                                                         | Studies contributing to the review finding                                                                                                                                                                                                                                                                                                                                                                                                                                                                                                                                                                                                                                                                                                                                                                                                                                                                                                                                                                                                                                                                                                                                                                                   |                                                                                                                                                                                                                                                                                                                                                                                                                                                                                                                                                                                                                                                                                                                                |                                                                                                                                                                                                                                                                                                                                                                                                                                                                                                                                                                                                                                                                                                                                                                                                                                                                                                                                                                                                                                                                                                                                                                                                                                                                                                                                                                                                                                                                                                                                                                                                                | CERQual assessment                               |                                                                                                                     |
|--------------------|---------------------------------------------------------------------------------------------------------------------------------------------------------------------------------------------------------------------------------------------------------------------------------------------------------------------------------------------------|------------------------------------------------------------------------------------------------------------------------------------------------------------------------------------------------------------------------------------------------------------------------------------------------------------------------------------------------------------------------------------------------------------------------------------------------------------------------------------------------------------------------------------------------------------------------------------------------------------------------------------------------------------------------------------------------------------------------------------------------------------------------------------------------------------------------------------------------------------------------------------------------------------------------------------------------------------------------------------------------------------------------------------------------------------------------------------------------------------------------------------------------------------------------------------------------------------------------------|--------------------------------------------------------------------------------------------------------------------------------------------------------------------------------------------------------------------------------------------------------------------------------------------------------------------------------------------------------------------------------------------------------------------------------------------------------------------------------------------------------------------------------------------------------------------------------------------------------------------------------------------------------------------------------------------------------------------------------|----------------------------------------------------------------------------------------------------------------------------------------------------------------------------------------------------------------------------------------------------------------------------------------------------------------------------------------------------------------------------------------------------------------------------------------------------------------------------------------------------------------------------------------------------------------------------------------------------------------------------------------------------------------------------------------------------------------------------------------------------------------------------------------------------------------------------------------------------------------------------------------------------------------------------------------------------------------------------------------------------------------------------------------------------------------------------------------------------------------------------------------------------------------------------------------------------------------------------------------------------------------------------------------------------------------------------------------------------------------------------------------------------------------------------------------------------------------------------------------------------------------------------------------------------------------------------------------------------------------|--------------------------------------------------|---------------------------------------------------------------------------------------------------------------------|
|                    |                                                                                                                                                                                                                                                                                                                                                   | Positive                                                                                                                                                                                                                                                                                                                                                                                                                                                                                                                                                                                                                                                                                                                                                                                                                                                                                                                                                                                                                                                                                                                                                                                                                     | Negative                                                                                                                                                                                                                                                                                                                                                                                                                                                                                                                                                                                                                                                                                                                       | No effect                                                                                                                                                                                                                                                                                                                                                                                                                                                                                                                                                                                                                                                                                                                                                                                                                                                                                                                                                                                                                                                                                                                                                                                                                                                                                                                                                                                                                                                                                                                                                                                                      | CERQual assessment of confidence in the evidence | Explanation of CERQual assessment                                                                                   |
|                    | <p><b>Professional stage and experience</b> (N=64, quantitative=53, qualitative*=8, mixed methods^=3): experience is likely to associate positively with ECRCs; although the evidence is weak as there is similar number of studies showing no experience effect at all; it is not clear whether ECRC increases or decreases during residency</p> | <p><b>Experience</b> (N=11: <a href="#">Clara et al., 2006</a>; <a href="#">Bayne et al., 2013*</a>; <a href="#">Handford et al., 2013</a> <a href="#">Julia-Sanchis et al., 2019 (cognitive empathy)</a>; <a href="#">Paul-Savoie et al., 2018</a>; <a href="#">Kataoka et al., 2012</a>; <a href="#">Shariat, Eshtad &amp; Ansari, 2010</a>; <a href="#">Wolfshohl et al., 2019</a>; <a href="#">Santamaria-Garcia et al., 2017 (in the context of dealing with intentional self-harm)</a>; <a href="#">Roberts et al., 2011^</a>; <a href="#">Katsari et al., 2020 (duration of employment in current post)</a><sup>38-48</sup>, <b>professional status/seniority (in-training, attending, chief)</b> (N=5: <a href="#">Osim et al., 2019</a>; <a href="#">Ferreira, Afons &amp; Ramos, 2020</a>; <a href="#">Khajavi &amp; Hekmat, 1971</a>; <a href="#">Jing, Jin &amp; Liu, 2019</a>; <a href="#">Cyrus et al., 2017</a>)<sup>71, 83-86</sup>, <b>increase during residency</b> (N=4: <a href="#">Rawal, Strahlendorf &amp; Nimmon, 2020*</a>; <a href="#">Hong et al., 2011</a>; <a href="#">Park et al., 2016 (only for people-oriented specialties)</a>; <a href="#">Foreback et al., 2018</a>)<sup>62-65</sup></p> | <p><b>Experience</b> (N=1: <a href="#">Julia-Sanchis et al., 2019 (affective empathy)</a>)<sup>41</sup>, <b>decline during residency</b> (N=5: <a href="#">Wolfshohl et al., 2019</a>; <a href="#">West et al., 2007</a>, <a href="#">Foreback et al., 2018</a>; <a href="#">Rosen et al., 2006</a>; <a href="#">Bellini &amp; Shea, 2005 (empathetic concern)</a>; <a href="#">Bellini, Baime &amp; Shea, 2002 (empathetic concern)</a>)<sup>48, 66-69</sup>, <b>decline during 3 month (mid to end year) during residency</b> (N=1: <a href="#">Reed et al., 2018</a>)<sup>75</sup>, <b>professional status/seniority (in-training, attending, chief)</b> (N=1: <a href="#">Alcorta-Garza et al., 2016</a>)<sup>84</sup></p> | <p><b>Year level during residency</b> (N=11: <a href="#">Shanafelt et al., 2005</a>; <a href="#">Khajavi &amp; Hekmat, 1971</a>; <a href="#">Reed et al., 2018</a>; <a href="#">Lee et al., 2018</a>; <a href="#">Park et al., 2016</a>; <a href="#">Greenberg et al., 2015</a>; <a href="#">Roberts et al., 2011^</a>; <a href="#">Foreback et al., 2018</a>; <a href="#">Mangione et al., 2002</a>; <a href="#">Saguem et al., 2020</a>; <a href="#">Petrahai &amp; Nwangwu, 2003</a>)<sup>45, 62, 64, 70-77</sup>, <b>experience</b> (N=13: <a href="#">Charles et al., 2018</a>; <a href="#">Zandbelt et al., 2007</a>; <a href="#">Kondo et al., 2013</a>; <a href="#">Gleichgerricht &amp; Decety, 2013</a>; <a href="#">Lelorain et al., 2013</a>; <a href="#">Jiao et al., 2014</a>; <a href="#">Kozeny &amp; Tisanska, 2013</a>; <a href="#">Bratek et al., 2015</a>; <a href="#">Pollak et al., 2007</a>; <a href="#">Lown, Shin &amp; Jones, 2019</a>; <a href="#">Putrino et al., 2018</a>; <a href="#">Carmel &amp; Glick, 1996</a>; <a href="#">Walocha, Tomaszewska &amp; Mizia, 2013</a>)<sup>49-61</sup>, <b>professional status/seniority (in-training, attending, chief)</b> (N=10: <a href="#">Moriarty et al., 2020</a>; <a href="#">Clara et al., 2006</a>; <a href="#">Zandbelt et al., 2007</a>; <a href="#">Zenasni et al., 2012</a>; <a href="#">Jiao et al., 2014</a>; <a href="#">Suh et al., 2012</a>; <a href="#">Di Lillo et al., 2009</a>; <a href="#">Carmel &amp; Glick, 1996</a>; <a href="#">Brady, Bambury &amp; O'Reilly, 2015^</a>)<sup>39, 50, 53, 61, 78-82</sup></p> | <p><b>Low confidence</b></p>                     | <p>Due to serious concerns about coherence and moderate concerns about methodological limitations and relevance</p> |
|                    | <p><b>Training/competency</b> (N=22: quantitative=17, qualitative*=5, mixed methods^=1): professional training and competency are likely to positively associate with ECRC, while lack of professional competency and training would produce an opposite result</p>                                                                               | <p><b>Empathy knowledge</b> (N=1: <a href="#">Picard et al., 2016*</a>)<sup>93</sup>, <b>professional training</b> (e.g. youth mental health, infectious disease, consultation skills) (N=3: <a href="#">Derksen et al., 2015*</a>; <a href="#">Moriarty et al., 2020</a>; <a href="#">Pardeshi et al., 2017</a>)<sup>80, 87, 88</sup>, <b>professional competency</b> (N=3: <a href="#">Bayne et al., 2013*</a>; <a href="#">Julia-Sanchis et al., 2019 (cognitive empathy)</a>; <a href="#">Jing, Jin &amp; Liu, 2019</a>)<sup>38, 41, 85</sup>, <b>longer mean duration of formal education</b> (N=1: <a href="#">Jiao et al., 2014</a>)<sup>53</sup>, <b>having a Master's degree</b> (N=1: <a href="#">Saguem et al., 2020</a>)<sup>76</sup>, <b>osteopathic (DO)/non-MD training</b> (N=2: <a href="#">Lebowitz &amp; Ahn, 2014</a>; <a href="#">Chaitoff et al., 2017</a>)<sup>99, 189</sup>, <b>analytically trained psychiatrists &gt; behaviorally trained psychiatrists</b> (N=1: <a href="#">Dehning et al., 2014</a>)<sup>115</sup></p>                                                                                                                                                                         | <p><b>Lack of special training/skills (EOL conversations, applying compassion)</b> (N=2: <a href="#">Roze des Ordonns et al., 2020*</a>, <a href="#">Bessen et al., 2019*</a>)<sup>154, 167</sup>, <b>professional competency</b> (N=1: <a href="#">Julia-Sanchis et al., 2019 (affective empathy)</a>)<sup>41</sup>, <b>medical education (MD)</b> (N=2: <a href="#">Lebowitz &amp; Ahn, 2014</a>; <a href="#">Mahoney, Sladek &amp; Neild, 2016^</a>)<sup>107, 189</sup></p>                                                                                                                                                                                                                                                 | <p><b>Type of degree (BA/MA/technical)</b> (N=1: <a href="#">Jiao et al., 2014</a>)<sup>53</sup>, <b>MD/DO degree</b> (N=1: <a href="#">Psyhojos, 2017</a>)<sup>108</sup>, <b>medical school</b> (N=1: <a href="#">Carmel &amp; Glick, 1996</a>)<sup>50</sup>, <b>bioethical education</b> (N=1: <a href="#">Clara et al., 2006</a>)<sup>39</sup>, <b>medical knowledge</b> (N=1: <a href="#">West et al., 2007</a>)<sup>69</sup>, <b>past communication training</b> (N=1: <a href="#">Pollak et al., 2007</a>)<sup>58</sup>, <b>self-reported need for communication training</b> (<a href="#">Zandbelt et al., 2007</a>)<sup>61</sup></p>                                                                                                                                                                                                                                                                                                                                                                                                                                                                                                                                                                                                                                                                                                                                                                                                                                                                                                                                                                   | <p><b>Low confidence</b></p>                     | <p>Due to serious concerns about coherence and moderate concerns about methodological limitations</p>               |

Green - low or medium risk of bias/Blue - not enough information/ Black - high RoB

\* - qualitative study

^ - mixed methods

Table 1: Summary of findings

| Domain description | Summary of review finding                                                                                                                                               | Studies contributing to the review finding                                                                                                                                                                                                                                                                                                                                                                                                                                                                                                                                                                                                                |          |                                                                                                                                                                                                                                                                                                                                                                                                                                                           | CERQual assessment                               |                                                                  |
|--------------------|-------------------------------------------------------------------------------------------------------------------------------------------------------------------------|-----------------------------------------------------------------------------------------------------------------------------------------------------------------------------------------------------------------------------------------------------------------------------------------------------------------------------------------------------------------------------------------------------------------------------------------------------------------------------------------------------------------------------------------------------------------------------------------------------------------------------------------------------------|----------|-----------------------------------------------------------------------------------------------------------------------------------------------------------------------------------------------------------------------------------------------------------------------------------------------------------------------------------------------------------------------------------------------------------------------------------------------------------|--------------------------------------------------|------------------------------------------------------------------|
|                    |                                                                                                                                                                         | Positive                                                                                                                                                                                                                                                                                                                                                                                                                                                                                                                                                                                                                                                  | Negative | No effect                                                                                                                                                                                                                                                                                                                                                                                                                                                 | CERQual assessment of confidence in the evidence | Explanation of CERQual assessment                                |
|                    | <p><b>Extra-professional activity</b> (N=11: quantitative=8, qualitative*=2, mixed methods^=1): having an extra-professional activity is possibly helpful for ECRCs</p> | <p><b>Employment outside of clinic (not working at only one place)</b> (N=1: Charles et al., 2018)<sup>51</sup>, <b>lower supplementary earnings</b> (N=1: Carmel &amp; Glick, 1996)<sup>50</sup>, <b>academic role/experience teaching</b> (N=3: Swendiman et al., 2019*; Chou, Kellom &amp; Shea, 2014*; Carmel &amp; Glick, 1996)<sup>50, 89, 90</sup>, <b>performing administrative duties</b> (N=2: Osim et al., 2019, Carmel &amp; Glick, 1996)<sup>50, 86</sup>, <b>being a Balint attendee or a supervisor</b> (N=1: Lelorain et al., 2013)<sup>56</sup>, <b>reading professional literature</b> (N=1: Carmel &amp; Glick, 1996)<sup>50</sup></p> |          | <p><b>Extra-professional activity</b> (N=1: Saguem et al., 2020)<sup>76</sup>, <b>academic role/ experience teaching</b> (N=2: Carmel &amp; Glick, 1996; Mahoney, Sladek &amp; Neild, 2016)<sup>50, 107</sup>, <b>being a part of professional society</b> (N=1: Zenasni et al., 2012)<sup>82</sup>, <b>moonlighting habits</b> (N=1: Shanafelt et al., 2005)<sup>77</sup>, <b>additional private practice</b> (N=1: Clara et al., 2006)<sup>39</sup></p> | <p><b>Low confidence</b></p>                     | <p>Due to serious concerns about coherence</p>                   |
|                    | <p><b>Medical errors/litigation</b> (N=1 quantitative): insufficient evidence</p>                                                                                       |                                                                                                                                                                                                                                                                                                                                                                                                                                                                                                                                                                                                                                                           |          | <p><b>Past medical error</b> (N=1: West et al., 2006)<sup>91</sup></p>                                                                                                                                                                                                                                                                                                                                                                                    | <p><b>Low confidence</b></p>                     | <p>Due to serious concerns about data adequacy and relevance</p> |

Green - low or medium risk of bias/Blue - not enough information/ Black - high RoB

\* - qualitative study

^ - mixed methods



Table 1: Summary of findings

| Domain description                                                                                                    | Summary of review finding                                                          | Studies contributing to the review finding                                                                                                                                                                                                                                                                                                                       |                                                                                                                                                                                                                                                                                                 |                                                                                                                                                                                                                                                                                                                                                                                                                                                                                                                                                                                                                                                                                                                                                                                                                                                                                                                                                  | CERQual assessment                                                                                                            |                                                                                                              |
|-----------------------------------------------------------------------------------------------------------------------|------------------------------------------------------------------------------------|------------------------------------------------------------------------------------------------------------------------------------------------------------------------------------------------------------------------------------------------------------------------------------------------------------------------------------------------------------------|-------------------------------------------------------------------------------------------------------------------------------------------------------------------------------------------------------------------------------------------------------------------------------------------------|--------------------------------------------------------------------------------------------------------------------------------------------------------------------------------------------------------------------------------------------------------------------------------------------------------------------------------------------------------------------------------------------------------------------------------------------------------------------------------------------------------------------------------------------------------------------------------------------------------------------------------------------------------------------------------------------------------------------------------------------------------------------------------------------------------------------------------------------------------------------------------------------------------------------------------------------------|-------------------------------------------------------------------------------------------------------------------------------|--------------------------------------------------------------------------------------------------------------|
|                                                                                                                       |                                                                                    | Positive                                                                                                                                                                                                                                                                                                                                                         | Negative                                                                                                                                                                                                                                                                                        | No effect                                                                                                                                                                                                                                                                                                                                                                                                                                                                                                                                                                                                                                                                                                                                                                                                                                                                                                                                        | CERQual assessment of confidence in the evidence                                                                              | Explanation of CERQual assessment                                                                            |
| ENVIRONMENTAL<br><br>(articles=57 , quantitative =25, qualitative=30, mixed methods=2)                                | <b>Healthcare settings (N=16, quantitative=13, qualitative=2, mixed methods=1)</b> |                                                                                                                                                                                                                                                                                                                                                                  |                                                                                                                                                                                                                                                                                                 |                                                                                                                                                                                                                                                                                                                                                                                                                                                                                                                                                                                                                                                                                                                                                                                                                                                                                                                                                  |                                                                                                                               |                                                                                                              |
|                                                                                                                       | It is likely that broader settings of practice have little impact on ECRC          | <b>Outpatient (ambulatory) settings</b> (N=2: Chaitoff et al., 2017; Santamaria-Garcia et al., 2017) <sup>46, 99</sup> , <b>urban settings</b> (N=2: Yuguero et al., 2017) <sup>124</sup> , <b>working at ED</b> (N=1: Julia-Sanchis et al., 2019) <sup>41</sup> , <b>working at a hospital/location of graduation</b> (N=1: Carmel & Glick, 1996) <sup>50</sup> | <b>Acute settings (surgery/ED)</b> (N=2: Batley et al., 2016* <sup>98, 138</sup> ; Stratta, Riding & Baker, 2016*) <sup>98, 138</sup> , <b>rural settings</b> (N=1: Yuguero et al., 2017) <sup>124</sup> , <b>pre-hospital medical services</b> (N=1: Julia-Sanchis et al., 2019) <sup>41</sup> | <b>Workplace (hospital/office/clinic; current rotation (outpatient; hospital; ICU; research))</b> (N=5: Shanafelt et al., 2005; Julia-Sanchis et al., 2019; Kemper et al., 2020; Shariat, Eshtad & Ansari, 2010; Carmel & Glick, 1996) <sup>41, 47, 50, 77, 158</sup> , <b>private vs public</b> (N=4: Kozeny & Tisanska, 2013; Mahoney, Sladek & Neild, 2016^; Shariat, Eshtad & Ansari, 2010; Carmel & Glick, 1996) <sup>47, 50, 55, 107</sup> , <b>urban vs rural</b> (N=3: Charles et al., 2018; Mahoney, Sladek & Neild, 2016^; Shariat, Eshtad & Ansari, 2010) <sup>47, 51, 107</sup> , <b>district hospital vs tertiary psychiatric</b> (N=1: Jiao et al., 2014) <sup>53</sup> , <b>practice type (partnership/non partnership)</b> (N=1: Charles et al., 2018) <sup>51</sup> , <b>hospital</b> (N=1: Di Lillo et al., 2009) <sup>79</sup> , <b>correctional/non-correctional</b> (N=1: Dhawan, Steinbach & Halpern, 2007) <sup>109</sup> | <b>Low confidence</b>                                                                                                         | Due to serious concerns about methodological limitations and moderate concerns about coherence and relevance |
|                                                                                                                       | <b>Organizational settings (N=45, quantitative=15, qualitative=29)</b>             |                                                                                                                                                                                                                                                                                                                                                                  |                                                                                                                                                                                                                                                                                                 |                                                                                                                                                                                                                                                                                                                                                                                                                                                                                                                                                                                                                                                                                                                                                                                                                                                                                                                                                  |                                                                                                                               |                                                                                                              |
| <b>General working conditions rating</b> (N=2, quantitative=1, mixed methods^=1): limited evidence to make conclusion | <b>Positive</b> (N=1: Mahoney, Sladek & Neild, 2016^) <sup>107</sup>               | <b>Negative</b> (N=1: Mahoney, Sladek & Neild, 2016^) <sup>107</sup>                                                                                                                                                                                                                                                                                             | <b>Unconducive work environment for providing empathetic care</b> (N=1: McFarland, Malone & Roth, 2017) <sup>104</sup>                                                                                                                                                                          | <b>Very low confidence</b>                                                                                                                                                                                                                                                                                                                                                                                                                                                                                                                                                                                                                                                                                                                                                                                                                                                                                                                       | Due to serious concerns about methodological limitations, data adequacy, and relevance, and moderate concerns about coherence |                                                                                                              |

Green - low or medium risk of bias/Blue - not enough information/ Black - high RoB

\* - qualitative study

^ - mixed methods

Table 1: Summary of findings

| Domain description | Summary of review finding                                                                                                                                                                                                                                                                | Studies contributing to the review finding                                                                                                                                         |                                                                                                                                                                                                                                                                             |           | CERQual assessment                               |                                   |
|--------------------|------------------------------------------------------------------------------------------------------------------------------------------------------------------------------------------------------------------------------------------------------------------------------------------|------------------------------------------------------------------------------------------------------------------------------------------------------------------------------------|-----------------------------------------------------------------------------------------------------------------------------------------------------------------------------------------------------------------------------------------------------------------------------|-----------|--------------------------------------------------|-----------------------------------|
|                    |                                                                                                                                                                                                                                                                                          | Positive                                                                                                                                                                           | Negative                                                                                                                                                                                                                                                                    | No effect | CERQual assessment of confidence in the evidence | Explanation of CERQual assessment |
|                    | <p><b>Organizational structure</b> (N=5, all qualitative*): it is possible that hierarchical environments are not conducive of ECRCs, although the evidence is small; we cannot make conclusions about the practice size as observations in two studies are based on the same sample</p> | <p><b>Lower number of registered patients/smaller practice size without loss of income</b> (N=1 (same sample): Derksen et al., 2015*; Derksen et al., 2016*)<sup>87, 149</sup></p> | <p><b>Non-facilitative practice structures</b> (N=1: Rider et al., 2018*)<sup>170</sup>, <b>hierarchical (not being respected or valued, having limited control over scheduling)</b> (N=2: Peng, Clarkin &amp; Doja, 2018*; Ahrweiler et al., 2014*)<sup>145, 153</sup></p> |           | <p><b>High confidence</b></p>                    | -                                 |

Green - low or medium risk of bias/Blue - not enough information/ Black - high RoB

\* - qualitative study

^ - mixed methods

Table 1: Summary of findings

| Domain description | Summary of review finding                                                                                                                                                                                                                            | Studies contributing to the review finding                                                                                                                                                                                                                                                                                                                                                                                                                                                                                                                                                                                                                                                                                                                                                                                                                                                                                                                                                                                                                                                                                                                                                                                                                                                                                                                                                                                                                                                                                                                                                                                                   |                                                                                                                  |           | CERQual assessment                               |                                   |
|--------------------|------------------------------------------------------------------------------------------------------------------------------------------------------------------------------------------------------------------------------------------------------|----------------------------------------------------------------------------------------------------------------------------------------------------------------------------------------------------------------------------------------------------------------------------------------------------------------------------------------------------------------------------------------------------------------------------------------------------------------------------------------------------------------------------------------------------------------------------------------------------------------------------------------------------------------------------------------------------------------------------------------------------------------------------------------------------------------------------------------------------------------------------------------------------------------------------------------------------------------------------------------------------------------------------------------------------------------------------------------------------------------------------------------------------------------------------------------------------------------------------------------------------------------------------------------------------------------------------------------------------------------------------------------------------------------------------------------------------------------------------------------------------------------------------------------------------------------------------------------------------------------------------------------------|------------------------------------------------------------------------------------------------------------------|-----------|--------------------------------------------------|-----------------------------------|
|                    |                                                                                                                                                                                                                                                      | Positive                                                                                                                                                                                                                                                                                                                                                                                                                                                                                                                                                                                                                                                                                                                                                                                                                                                                                                                                                                                                                                                                                                                                                                                                                                                                                                                                                                                                                                                                                                                                                                                                                                     | Negative                                                                                                         | No effect | CERQual assessment of confidence in the evidence | Explanation of CERQual assessment |
|                    | <p><b>Organizational resources</b> (N=11: quantitative=2, qualitative*=9): organizational resources, especially continuous education and counseling, good leadership, human resources support, and physical resources, are facilitative of ECRCs</p> | <p><b>Continuous education and counseling</b> (counseling services, Balint groups, activities, educational development programs sensitivity exercises, communication coaching and reflection exercises; Schwartz Center Rounds®; patient-centered retreats, supervision and intervention for GPs to help with emotions) (N=6: <a href="#">Derksen et al., 2016*</a>; <a href="#">Ahrweiler et al., 2014*</a>; <a href="#">Gilligan et al., 2019*</a>; <a href="#">Chou, Kellom &amp; Shea, 2014*</a>; <a href="#">Lelorain et al., 2013</a>; <a href="#">Rider et al., 2018*</a>)<sup>56, 89, 149, 153, 160, 170</sup>, <b>good leadership</b> (N=3: <a href="#">Anandarajah &amp; Roseman, 2014*</a>; <a href="#">Mills, Wand &amp; Fraser, 2018*</a>; <a href="#">Rider et al., 2018*</a>)<sup>136, 155, 170</sup>, <b>physical recourses</b> (e.g. office systems, access to healthy food and fitness facilities; dry cleaning pick-up, onsite oil changes and meals-to-go available from the cafeteria; comfortable staff lounge areas) (N=1: <a href="#">Chou, Kellom &amp; Shea, 2014*</a>)<sup>89</sup>, <b>human recourses support</b> (pain consultants, social workers, palliative care team) (N=2: <a href="#">Bishop et al., 2014*</a>; <a href="#">Chou, Kellom &amp; Shea, 2014*</a>)<sup>89, 168</sup>, <b>good learning environment, encouraging compassion or empathy in educational curriculum</b> (N=2: <a href="#">Kemper et al., 2020</a>; <a href="#">Stratta, Riding &amp; Baker, 2016*</a>)<sup>98, 158</sup>, <b>policies and vision statements</b> (N=1: <a href="#">Gilligan et al., 2019*</a>)<sup>160</sup></p> | <p><b>Not enough resources to help</b> (N=1: <a href="#">Anandarajah &amp; Roseman, 2014*</a>)<sup>136</sup></p> |           | <p><b>High confidence</b></p>                    | -                                 |

Green - low or medium risk of bias/Blue - not enough information/ Black - high RoB

\* - qualitative study

^ - mixed methods

Table 1: Summary of findings

| Domain description | Summary of review finding                                                                                                                                                                                                                                                                                                                          | Studies contributing to the review finding                                                                                                                                                                                                                                                                                                                                                                                                                                                                                                                                                                                                                                                                                                                                                                                                                                                                                                                    |                                                                                                                                                                                                                                                                                                                                                                                                                                                                                                                                                                                                                                                                                                                                                                                                                                                                                                                                                                                                                                                                                                                                                                                                                                                                                                                                                                                                                                                                                                                                                                                                                                                                                                                                                                                                                                                                                                                                                                                                                                                                                                                                                                                                                                                                                                                                                                                                                                                                                                                                                                                                                                                                                                                                                                                                                                                  |                                                                                                                                                                                                                                                                                                                                                                                                                                                                                                                                                                                                                                                                                                                                                                                                                                                                                                                                                                                           | CERQual assessment                               |                                   |
|--------------------|----------------------------------------------------------------------------------------------------------------------------------------------------------------------------------------------------------------------------------------------------------------------------------------------------------------------------------------------------|---------------------------------------------------------------------------------------------------------------------------------------------------------------------------------------------------------------------------------------------------------------------------------------------------------------------------------------------------------------------------------------------------------------------------------------------------------------------------------------------------------------------------------------------------------------------------------------------------------------------------------------------------------------------------------------------------------------------------------------------------------------------------------------------------------------------------------------------------------------------------------------------------------------------------------------------------------------|--------------------------------------------------------------------------------------------------------------------------------------------------------------------------------------------------------------------------------------------------------------------------------------------------------------------------------------------------------------------------------------------------------------------------------------------------------------------------------------------------------------------------------------------------------------------------------------------------------------------------------------------------------------------------------------------------------------------------------------------------------------------------------------------------------------------------------------------------------------------------------------------------------------------------------------------------------------------------------------------------------------------------------------------------------------------------------------------------------------------------------------------------------------------------------------------------------------------------------------------------------------------------------------------------------------------------------------------------------------------------------------------------------------------------------------------------------------------------------------------------------------------------------------------------------------------------------------------------------------------------------------------------------------------------------------------------------------------------------------------------------------------------------------------------------------------------------------------------------------------------------------------------------------------------------------------------------------------------------------------------------------------------------------------------------------------------------------------------------------------------------------------------------------------------------------------------------------------------------------------------------------------------------------------------------------------------------------------------------------------------------------------------------------------------------------------------------------------------------------------------------------------------------------------------------------------------------------------------------------------------------------------------------------------------------------------------------------------------------------------------------------------------------------------------------------------------------------------------|-------------------------------------------------------------------------------------------------------------------------------------------------------------------------------------------------------------------------------------------------------------------------------------------------------------------------------------------------------------------------------------------------------------------------------------------------------------------------------------------------------------------------------------------------------------------------------------------------------------------------------------------------------------------------------------------------------------------------------------------------------------------------------------------------------------------------------------------------------------------------------------------------------------------------------------------------------------------------------------------|--------------------------------------------------|-----------------------------------|
|                    |                                                                                                                                                                                                                                                                                                                                                    | Positive                                                                                                                                                                                                                                                                                                                                                                                                                                                                                                                                                                                                                                                                                                                                                                                                                                                                                                                                                      | Negative                                                                                                                                                                                                                                                                                                                                                                                                                                                                                                                                                                                                                                                                                                                                                                                                                                                                                                                                                                                                                                                                                                                                                                                                                                                                                                                                                                                                                                                                                                                                                                                                                                                                                                                                                                                                                                                                                                                                                                                                                                                                                                                                                                                                                                                                                                                                                                                                                                                                                                                                                                                                                                                                                                                                                                                                                                         | No effect                                                                                                                                                                                                                                                                                                                                                                                                                                                                                                                                                                                                                                                                                                                                                                                                                                                                                                                                                                                 | CERQual assessment of confidence in the evidence | Explanation of CERQual assessment |
|                    | <p><b>Operational environment</b> (N=36: quantitative=13, qualitative*=23): time constraints, bureaucracy, lack of continuity and austerity policies associate with lower ECRCs, efficient organizational practices, such as good triage, seem to increase ECRCs; the evidence regarding the amount of work or economic profit is inconclusive</p> | <p><b>Efficient organizational practices:</b> good triage; a more flexible system of appointments, structured deliberations between GPs and practice assistants, understanding of interruptions timing (N=3: <a href="#">Derksen et al., 2015*</a>, <a href="#">2016* (same sample)</a>; <a href="#">Batley et al., 2016*</a>; <a href="#">Pinder, 1992*</a>)<sup>87, 138, 149, 152</sup>, <b>increased consultation length</b> (N=2: <a href="#">Derksen et al., 2015*</a>, <a href="#">2016* (same sample)</a>; <a href="#">Lelorain et al., 2013</a>)<sup>56, 87, 149</sup>, <b>no time pressure</b> (N=1: <a href="#">Derksen et al., 2015*</a>)<sup>87</sup>, <b>rewarding empathy by measuring empathy</b> (N=1: <a href="#">Derksen et al., 2015*</a>)<sup>87</sup>, <b>work variability</b> (N=1: <a href="#">Swendiman et al., 2019*</a>)<sup>90</sup>, <b>monetary incentives</b> (N=1: <a href="#">Jing, Jin &amp; Liu, 2019</a>)<sup>85</sup></p> | <p><b>Time constraints/pressures/overloaded work schedules and less time spend with patient</b> (N=18: <a href="#">Uygur, Brown &amp; Herbert, 2019*</a>; <a href="#">Ahrweiler et al., 2014*</a>; <a href="#">Roze des Ordonns et al., 2020*</a>; <a href="#">Rawal, Strahlendorf &amp; Nimmon, 2020*</a>; <a href="#">Peng, Clarkin &amp; Doja, 2018*</a>; <a href="#">Branch et al., 2017*</a>; <a href="#">Bayne et al., 2013*</a>; <a href="#">Lin, Hsu &amp; Chong, 2008*</a>; <a href="#">Haider, Riaz &amp; Gill, 2020*</a>; <a href="#">Mills, Wand &amp; Fraser, 2018*</a>; <a href="#">Bishop et al., 2014*</a>; <a href="#">Derksen et al., 2018*</a>; <a href="#">Porthe et al., 2018*</a>; <a href="#">Kerasidou, 2019*</a>; <a href="#">Bessen et al., 2019*</a>; <a href="#">Stratta, Riding &amp; Baker, 2016*</a>; <a href="#">Rider et al., 2018*</a>; <a href="#">Lown, Shin &amp; Jones, 2019</a>)<sup>38, 57, 65, 98, 127, 131, 145, 146, 148, 153-155, 157, 159, 167-170</sup>, <b>workload</b> (N=7: <a href="#">Derksen et al., 2016*</a>, <a href="#">2018* (same sample)</a>, <a href="#">Picard et al., 2016*</a>; <a href="#">Haider, Riaz &amp; Gill, 2020*</a>; <a href="#">Ahrweiler et al., 2014*</a>; <a href="#">Roze des Ordonns et al., 2020*</a>; <a href="#">Lyness, 1993*</a>; <a href="#">Putrino et al., 2018</a>)<sup>59, 93, 127, 146, 147, 149, 153, 167</sup>, <b>patient load</b> (N=6: <a href="#">Derksen et al., 2016*</a>, <a href="#">Bayne et al., 2013*</a>, <a href="#">Lin, Hsu &amp; Chong, 2008*</a>, <a href="#">Stratta, Riding &amp; Baker, 2016*</a>, <a href="#">Sandikci et al., 2017</a>; <a href="#">Putrino et al., 2018</a>)<sup>38, 59, 98, 102, 149, 157</sup>, <b>long working hours</b> (N=1: <a href="#">Peng, Clarkin &amp; Doja, 2018*</a>)<sup>145</sup>, <b>bureaucracy/red tape</b> (excessive administrative processes or rules, new protocols, checklists, patient-distant tasks) (N=7: <a href="#">Derksen et al., 2016*</a>, <a href="#">2018* (same sample)</a>, <a href="#">Kerasidou &amp; Kingori, 2019*</a>, <a href="#">Kerasidou, 2019* (same sample)</a>, <a href="#">Peng, Clarkin &amp; Doja, 2018*</a>; <a href="#">Branch et al., 2017*</a>; <a href="#">Bayne et al., 2013*</a>; <a href="#">Ahrweiler et al., 2014*</a>; <a href="#">Rider et al., 2018*</a>)<sup>38, 127, 145, 146, 148, 149, 153, 169-171</sup>, <b>lack of continuity with one patient</b>, fragmentation (lots of different clinicians involved) (N=2: <a href="#">Bishop et al., 2014*</a>, <a href="#">Roze des Ordonns et al., 2020*</a>)<sup>167, 168</sup>, <b>targets/unrealistic objectives, and obsessive management monitoring</b> (N=2: <a href="#">Haider, Riaz &amp; Gill, 2020*</a>, <a href="#">Kerasidou, 2019*</a>)<sup>127, 169</sup>, <b>austerity</b></p> | <p><b>Patient load</b> (N=4: <a href="#">Zenasni et al., 2012</a>, <a href="#">Zandbelt et al., 2007</a>, <a href="#">Ferreira, Afons &amp; Ramos, 2020</a>, <a href="#">Passalacqua, 2011</a>)<sup>61, 82, 84, 163</sup>, <b>workload</b> (N=1: <a href="#">Zandbelt et al., 2007</a>)<sup>61</sup>, <b>length of consultation</b> (N=2: <a href="#">Zandbelt et al., 2007</a>; <a href="#">Zenasni et al., 2012</a>)<sup>61, 82</sup>, <b>economic profit</b> (N=2: <a href="#">Charles et al., 2018</a>; <a href="#">Carmel &amp; Glick, 1996</a>)<sup>50, 51</sup>, <b>short length of patient stay</b> (N=1: <a href="#">McFarland, Malone &amp; Roth, 2017</a>)<sup>104</sup>, <b>being able to do a patient sign-out</b> (N=1: <a href="#">Lases et al., 2019</a>)<sup>172</sup>, <b>visit sequence</b> (N=1: <a href="#">Zandbelt et al., 2007</a>)<sup>61</sup>, <b>average available time (follow-up consult)</b> (N=1: <a href="#">Zandbelt et al., 2007</a>)<sup>61</sup></p> | High confidence                                  | -                                 |

Green - low or medium risk of bias/Blue - not enough information/ Black - high RoB

\* - qualitative study

^ - mixed methods

Table 1: Summary of findings

| Domain description | Summary of review finding                                                                                                                                                | Studies contributing to the review finding                                                                                                                                                                                                                                                                                                                                                                                                                                                                                                                                                                                                                                                                                                                                                                                                                                                                                                                                                                                                                                                                                                                            |                                                                                                                                                                                                                                                                                                                                                                                                                                                                                                                                                                                                                                                                                                                                                                                                                                                                                                                                                                                                                                                                                                                                                                             |                                   | CERQual assessment                                  |                                   |
|--------------------|--------------------------------------------------------------------------------------------------------------------------------------------------------------------------|-----------------------------------------------------------------------------------------------------------------------------------------------------------------------------------------------------------------------------------------------------------------------------------------------------------------------------------------------------------------------------------------------------------------------------------------------------------------------------------------------------------------------------------------------------------------------------------------------------------------------------------------------------------------------------------------------------------------------------------------------------------------------------------------------------------------------------------------------------------------------------------------------------------------------------------------------------------------------------------------------------------------------------------------------------------------------------------------------------------------------------------------------------------------------|-----------------------------------------------------------------------------------------------------------------------------------------------------------------------------------------------------------------------------------------------------------------------------------------------------------------------------------------------------------------------------------------------------------------------------------------------------------------------------------------------------------------------------------------------------------------------------------------------------------------------------------------------------------------------------------------------------------------------------------------------------------------------------------------------------------------------------------------------------------------------------------------------------------------------------------------------------------------------------------------------------------------------------------------------------------------------------------------------------------------------------------------------------------------------------|-----------------------------------|-----------------------------------------------------|-----------------------------------|
|                    |                                                                                                                                                                          | Positive                                                                                                                                                                                                                                                                                                                                                                                                                                                                                                                                                                                                                                                                                                                                                                                                                                                                                                                                                                                                                                                                                                                                                              | Negative                                                                                                                                                                                                                                                                                                                                                                                                                                                                                                                                                                                                                                                                                                                                                                                                                                                                                                                                                                                                                                                                                                                                                                    | No effect                         | CERQual assessment of confidence in the evidence    | Explanation of CERQual assessment |
|                    |                                                                                                                                                                          |                                                                                                                                                                                                                                                                                                                                                                                                                                                                                                                                                                                                                                                                                                                                                                                                                                                                                                                                                                                                                                                                                                                                                                       | <p><b>policies/cuts</b> (N=2: <a href="#">Porthé et al., 2018*</a>, <a href="#">Kerasidou, 2019*</a><sup>159, 169</sup>, (N=2), <b>low remuneration</b> (N=2: <a href="#">Peng, Clarkin &amp; Doja, 2018*</a>; <a href="#">Derksen et al., 2016*</a>)<sup>145, 149</sup>, <b>compensation decisions rules</b> (N=1: <a href="#">Branch et al., 2017*</a>)<sup>148</sup>, "<b>being the doormat of the health insurance companies</b>", <b>the attitude of health financiers</b> (N=1: <a href="#">Derksen et al., 2015*</a>, 2016* (same sample))<sup>87, 149</sup>, <b>invisibility of certain type of work</b> (compassion, EOL conversations)/ emphasis on measuring the quality of care by the figures of a protocol that does not include the importance of empathy as a quality indicator (N=2: <a href="#">Derksen et al., 2015*</a>; <a href="#">Bessen et al., 2019*</a>)<sup>87, 154</sup>, <b>priority towards aggressive curative treatments</b> (N=1; <a href="#">Bishop et al., 2014*</a>)<sup>168</sup>, <b>doing someone else's job</b> (wrong fit of diagnoses to specialization/department) (N=1: <a href="#">Batley et al., 2016*</a>)<sup>138</sup></p> |                                   |                                                     |                                   |
|                    | <p><b>Proximal (clinical) environment</b> (N=12: quantitative=3, qualitative*=9): stressful clinical environment (busyness, interruptions) is not conducive of ECRCs</p> | <p><b>(Stressful) clinical environment in general</b> (N=2: <a href="#">Roze des Ordonns et al., 2020*</a>; <a href="#">Picard et al., 2016*</a>)<sup>93, 167</sup>, <b>phone calls</b> (N=2: <a href="#">Branch et al., 2017*</a>; <a href="#">Derksen et al., 2015*</a>, 2016* (same sample))<sup>87, 148, 149</sup>, <b>full waiting rooms</b> (N=1: <a href="#">Derksen et al., 2016*</a>, 2018* (same sample))<sup>146, 149</sup>, <b>exposure to challenging situations/ high-pressure scenarios and life threatening medical conditions</b> (N=2: <a href="#">Peng, Clarkin &amp; Doja, 2018*</a>, <a href="#">Bayne et al., 2013*</a>)<sup>38, 145</sup>, <b>busy environment/sense of urgency</b> (N=1: <a href="#">Batley et al., 2016*</a>)<sup>138</sup>, <b>interruptions by assistants</b> (N=1: <a href="#">Derksen et al., 2015*</a>)<sup>87</sup>, <b>recent night shift</b> (N=1: <a href="#">Derksen et al., 2016*</a>)<sup>149</sup>, <b>involvement with call-services (being on-call more often)</b> (N=1: <a href="#">Clara et al., 2006</a>)<sup>39</sup>, <b>long call shifts</b> (N=1: <a href="#">Passalacqua, 2011</a>)<sup>163</sup></p> | <p><b>Presence of 3rd person (relative) in clinical interaction</b> (N=1: <a href="#">Zandbelt et al., 2007</a>)<sup>61</sup></p>                                                                                                                                                                                                                                                                                                                                                                                                                                                                                                                                                                                                                                                                                                                                                                                                                                                                                                                                                                                                                                           | <p><b>Moderate confidence</b></p> | <p>Due to moderate concerns about data adequacy</p> |                                   |

Green - low or medium risk of bias/Blue - not enough information/ Black - high RoB

\* - qualitative study

^ - mixed methods

Table 1: Summary of findings

| Domain description | Summary of review finding                                                                                                               | Studies contributing to the review finding                                                                                                                                                                                                                                                                                                                                                                                                                                                                                                                                                                                                                                                                                 |                                                                                                                                                                                                                                                                                                                                                                                                                                                                                                                                                                                                                                                                                                        |                                                                                                                                                                                                                                                                                                                                                                                                                                                                       | CERQual assessment                               |                                                                                         |
|--------------------|-----------------------------------------------------------------------------------------------------------------------------------------|----------------------------------------------------------------------------------------------------------------------------------------------------------------------------------------------------------------------------------------------------------------------------------------------------------------------------------------------------------------------------------------------------------------------------------------------------------------------------------------------------------------------------------------------------------------------------------------------------------------------------------------------------------------------------------------------------------------------------|--------------------------------------------------------------------------------------------------------------------------------------------------------------------------------------------------------------------------------------------------------------------------------------------------------------------------------------------------------------------------------------------------------------------------------------------------------------------------------------------------------------------------------------------------------------------------------------------------------------------------------------------------------------------------------------------------------|-----------------------------------------------------------------------------------------------------------------------------------------------------------------------------------------------------------------------------------------------------------------------------------------------------------------------------------------------------------------------------------------------------------------------------------------------------------------------|--------------------------------------------------|-----------------------------------------------------------------------------------------|
|                    |                                                                                                                                         | Positive                                                                                                                                                                                                                                                                                                                                                                                                                                                                                                                                                                                                                                                                                                                   | Negative                                                                                                                                                                                                                                                                                                                                                                                                                                                                                                                                                                                                                                                                                               | No effect                                                                                                                                                                                                                                                                                                                                                                                                                                                             | CERQual assessment of confidence in the evidence | Explanation of CERQual assessment                                                       |
|                    |                                                                                                                                         | <b>Collegial climate (N=19, quantitative=6, qualitative=13)</b>                                                                                                                                                                                                                                                                                                                                                                                                                                                                                                                                                                                                                                                            |                                                                                                                                                                                                                                                                                                                                                                                                                                                                                                                                                                                                                                                                                                        |                                                                                                                                                                                                                                                                                                                                                                                                                                                                       |                                                  |                                                                                         |
|                    | Positive role models and collegial support associate with greater ECRCs, lack of support and unprofessional superiors will hinder ECRCs | <p><b>Role models: positive</b> (N= 7: Ahrweiler et al., 2014*; Anandarajah &amp; Roseman, 2014*; Gilligan et al., 2019*; Mills, Wand &amp; Fraser, 2018*; Swendiman et al., 2019*; Stratta, Riding &amp; Baker, 2016*; Rider et al., 2018*)<sup>90, 98, 136, 153, 155, 160, 170</sup> <b>and negative</b> (N=1: Swendiman et al., 2019*)<sup>90</sup>, <b>good (relationships with) colleagues</b> (N=4: Derksen et al., 2016*; Chou, Kellom &amp; Shea, 2014*; Swendiman et al., 2019*; Charles et al., 2018)<sup>51, 89, 90, 149</sup>, <b>peer support</b> (N=2: Ahrweiler et al., 2014*; Bessen et al., 2019*)<sup>153, 154</sup>, <b>informal teaching/mentoring</b> (N=1: Gilligan et al., 2019*)<sup>160</sup></p> | <p><b>Negative role models/lack of physician role models</b> that were responsive to patient emotions (N=2: Ahrweiler et al., 2014*; Lyness, 1993*)<sup>147, 153</sup>, <b>lack of support in general/feeling alone</b> (N=3: Peng, Clarkin &amp; Doja, 2018*; Anandarajah &amp; Roseman, 2014*; Lown, Shin &amp; Jones, 2019)<sup>57, 136, 145</sup>, <b>unprofessional superiors/non-supportive leadership/lack of respect from supervisors</b> (N=2: Peng, Clarkin &amp; Doja, 2018*; Rider et al., 2018*)<sup>145, 170</sup>, <b>challenging colleagues/colleagues do not treat each other with compassion</b> (N=2: Peng, Clarkin &amp; Doja, 2018*; Branch et al., 2017*)<sup>145, 148</sup></p> | <p><b>Teamwork/supportiveness/satisfaction with relationships with colleagues</b> (N=3: Lases et al., 2019, Carmel &amp; Glick, 1996, Passalacqua, 2011)<sup>50, 163, 172</sup>, <b>feeling unsupported, mistreatment</b> (N=1: McFarland, Malone &amp; Roth, 2017)<sup>104</sup>, <b>educational atmosphere: role of specialty tutor, coaching and assessment, work adapted to competence, accessibility supervisors</b> (N=1: Lases et al., 2019)<sup>172</sup></p> | <b>Moderate confidence</b>                       | Due to moderate concerns about methodological limitations, coherence, and data adequacy |

Green - low or medium risk of bias/Blue - not enough information/ Black - high RoB

\* - qualitative study

^ - mixed methods

Table 1: Summary of findings

| Domain description | Summary of review finding                                                                                                                                                                                                                                                                                                                                     | Studies contributing to the review finding                                                                                                                                                                                                                                                                                                                                                                                                                                                                                      |                                                                                                                                                                                                                                                                                                                                                                                                                                                                                                                                                                                                                                                                                                                                                                                                                                                                                                                                                                                                                                                                                                                                                                                                                                                                                                                                                                                                                                                                                                                                                                                                                                                                                                                                                                                                                                                                            |           | CERQual assessment                               |                                                            |
|--------------------|---------------------------------------------------------------------------------------------------------------------------------------------------------------------------------------------------------------------------------------------------------------------------------------------------------------------------------------------------------------|---------------------------------------------------------------------------------------------------------------------------------------------------------------------------------------------------------------------------------------------------------------------------------------------------------------------------------------------------------------------------------------------------------------------------------------------------------------------------------------------------------------------------------|----------------------------------------------------------------------------------------------------------------------------------------------------------------------------------------------------------------------------------------------------------------------------------------------------------------------------------------------------------------------------------------------------------------------------------------------------------------------------------------------------------------------------------------------------------------------------------------------------------------------------------------------------------------------------------------------------------------------------------------------------------------------------------------------------------------------------------------------------------------------------------------------------------------------------------------------------------------------------------------------------------------------------------------------------------------------------------------------------------------------------------------------------------------------------------------------------------------------------------------------------------------------------------------------------------------------------------------------------------------------------------------------------------------------------------------------------------------------------------------------------------------------------------------------------------------------------------------------------------------------------------------------------------------------------------------------------------------------------------------------------------------------------------------------------------------------------------------------------------------------------|-----------|--------------------------------------------------|------------------------------------------------------------|
|                    |                                                                                                                                                                                                                                                                                                                                                               | Positive                                                                                                                                                                                                                                                                                                                                                                                                                                                                                                                        | Negative                                                                                                                                                                                                                                                                                                                                                                                                                                                                                                                                                                                                                                                                                                                                                                                                                                                                                                                                                                                                                                                                                                                                                                                                                                                                                                                                                                                                                                                                                                                                                                                                                                                                                                                                                                                                                                                                   | No effect | CERQual assessment of confidence in the evidence | Explanation of CERQual assessment                          |
|                    |                                                                                                                                                                                                                                                                                                                                                               | <b>Organizational culture and values (N=21, qualitative=20, mixed methods=1)</b>                                                                                                                                                                                                                                                                                                                                                                                                                                                |                                                                                                                                                                                                                                                                                                                                                                                                                                                                                                                                                                                                                                                                                                                                                                                                                                                                                                                                                                                                                                                                                                                                                                                                                                                                                                                                                                                                                                                                                                                                                                                                                                                                                                                                                                                                                                                                            |           |                                                  |                                                            |
|                    | Supportive organizational culture is likely to affect ECRCs positively, efficiency-driven, disease-centered, evidence-based/guideline driven healthcare with emphasis on business is likely to hinder ECRCs. Additionally, hidden curriculum and emphasizing intelligence and excellence values in medical education are not conducive of compassionate care. | <p><b>Culture (supportive, cooperative, collaborative)</b> (N=5: Ahrweiler et al., 2014*; Anandarajah &amp; Roseman, 2014*; Mills, Wand &amp; Fraser, 2018*; Bessen et al., 2019*; Rider et al., 2018*)<sup>136, 153-155, 170</sup>, <b>compassion recognition by organization, nurturing empathy, compassion and emotional intelligence in staff</b> (N=1: Gilligan et al., 2019*)<sup>160</sup>, <b>value placed on physicians as human beings (organizational)</b> (N=1: Anandarajah &amp; Roseman, 2014*)<sup>136</sup></p> | <p><b>Organizational culture and values (that inhibits humanism)</b> (N=3: Roze des Ordonns et al., 2020*; Rawal, Strahlendorf &amp; Nimmon, 2020*; Rider et al., 2018*)<sup>65, 167, 170</sup>, <b>efficiency/operationalization of healthcare</b> (N=4: Anandarajah &amp; Roseman, 2014*; Peng, Clarkin &amp; Doja, 2018*; Bishop et al., 2014*; Kerasidou &amp; Kingori, 2019* and Kerasidou, 2019* (same sample))<sup>136, 145, 168, 169, 171</sup>), <b>disease-centered emphasis/</b> seeing people as diagnoses/culture of focusing on the medico-scientific abstraction instead of the patient/favoring clinical knowledge over patient communication skills/detachment culture (N=5: Ahrweiler et al., 2014*; Peng, Clarkin &amp; Doja, 2018*; Derksen et al., 2016*; Bayne et al., 2013*; Crowe &amp; Brugha, 2018*)<sup>38, 145, 149, 153, 156</sup>, <b>evidence-based practice/guideline-driven care</b> (therapeutic regimens and 'programmed asking' from evidence-based guidelines and protocols)/ managed care: strict medical guidelines and standardized treatments (N=4: Derksen et al., 2015*, 2016* (same sample); Baker et al., 2018*; Bayne et al., 2013*; Kerasidou &amp; Kingori, 2019*)<sup>38, 87, 149, 151, 171</sup>, <b>business values/commercialization of medical practice</b> (N=3: Branch et al., 2017*; Bayne et al., 2013*; Haider, Riaz &amp; Gill, 2020*)<sup>38, 127, 148</sup>, <b>hidden curriculum:</b> language, patient judgements, avoiding talking to patient so there are less things to do/less obligations (N=3: Rawal, Strahlendorf &amp; Nimmon, 2020*, Branch et al., 2017*, Stratta, Riding &amp; Baker, 2016*)<sup>65, 98, 148</sup>, <b>"broken system"/training (loss of empathy)</b> (N=2: Peng, Clarkin &amp; Doja, 2018*; Brady, Bambury &amp; O'Reilly, 2015*)<sup>78, 145</sup>, <b>detail-oriented</b></p> |           | <b>Moderate confidence</b>                       | Due to moderate concerns about data adequacy and relevance |

Green - low or medium risk of bias/Blue - not enough information/ Black - high RoB

\* - qualitative study

^ - mixed methods

Table 1: Summary of findings

| Domain description | Summary of review finding                                                                                                                                                                                                                                                                                                             | Studies contributing to the review finding                                                                                                   |                                                                                                                                                                                                                                                                                                                                                                                                                                                                                                                                                                                                                                                                                                                                                                                                                                          |                                                                                                                                                                                                                                                                                                                                                                                     | CERQual assessment                               |                                   |
|--------------------|---------------------------------------------------------------------------------------------------------------------------------------------------------------------------------------------------------------------------------------------------------------------------------------------------------------------------------------|----------------------------------------------------------------------------------------------------------------------------------------------|------------------------------------------------------------------------------------------------------------------------------------------------------------------------------------------------------------------------------------------------------------------------------------------------------------------------------------------------------------------------------------------------------------------------------------------------------------------------------------------------------------------------------------------------------------------------------------------------------------------------------------------------------------------------------------------------------------------------------------------------------------------------------------------------------------------------------------------|-------------------------------------------------------------------------------------------------------------------------------------------------------------------------------------------------------------------------------------------------------------------------------------------------------------------------------------------------------------------------------------|--------------------------------------------------|-----------------------------------|
|                    |                                                                                                                                                                                                                                                                                                                                       | Positive                                                                                                                                     | Negative                                                                                                                                                                                                                                                                                                                                                                                                                                                                                                                                                                                                                                                                                                                                                                                                                                 | No effect                                                                                                                                                                                                                                                                                                                                                                           | CERQual assessment of confidence in the evidence | Explanation of CERQual assessment |
|                    |                                                                                                                                                                                                                                                                                                                                       |                                                                                                                                              | <p><b>culture/technical tasks priority</b> (N=2: Anandarajah &amp; Roseman, 2014*; Bishop et al., 2014*)<sup>136, 168</sup>, <b>busy-ness culture</b> (N=2: Anandarajah &amp; Roseman, 2014*; Mills, Wand &amp; Fraser, 2018*)<sup>136, 155</sup>, <b>intelligence and excellence values</b> (medical education) (N=2: Bayne et al., 2013*; Haider, Riaz &amp; Gill, 2020*)<sup>38, 127</sup>, <b>culture of patient safety from the perspective of professional liability</b> (N=1: Baker et al., 2018*)<sup>151</sup>, <b>standardized treatment culture</b> (restrictions on reimbursements and prescriptions) (N=1: Bayne et al., 2013*)<sup>38</sup>, <b>values of being emotionally tough</b> (N=1: Crowe &amp; Brugha, 2018*)<sup>156</sup>, <b>unsupportive culture</b> (N=1: Mills, Wand &amp; Fraser, 2018*)<sup>155</sup></p> |                                                                                                                                                                                                                                                                                                                                                                                     |                                                  |                                   |
| PATIENT AND FAMILY | <b>Relational factors (N=19, quantitative=9, qualitative=10)</b>                                                                                                                                                                                                                                                                      |                                                                                                                                              |                                                                                                                                                                                                                                                                                                                                                                                                                                                                                                                                                                                                                                                                                                                                                                                                                                          |                                                                                                                                                                                                                                                                                                                                                                                     |                                                  |                                   |
|                    | <p>(articles=37, quantitative=19, qualitative=17, mixed methods=2)</p> <p><b>Connection/interaction</b> (N=13: quantitative=6, qualitative*=7): a presence of personal "click" and easy, open communication are likely to positively associate with ECRC; communication difficulties are likely to negatively associate with ECRC</p> | <p><b>Connection/"click"</b> (N=2: Uygur, Brown &amp; Herbert, 2019*; Derksen et al., 2015*, 2018* (same sample))<sup>87, 131, 146</sup></p> | <p><b>Lack of reciprocal interaction/ not being able to "click"</b> (N=1: Derksen et al., 2016*, 2018* (same sample))<sup>146, 149</sup>, <b>difficulty in communication</b> (i.e. immigrants, intellectual disability - language difference, more explanations/paperwork) (N=5: Roze des Ordon et al., 2020*, Porthé et al., 2018*; Bayne et al., 2013*; Street, Gordon &amp; Haidet, 2007; Meeuwesen et al., 2006)<sup>38, 121, 159, 167, 174</sup>, <b>lack of trust and openness</b> (caused by, for instance, liability issues) (N=1: Derksen et al., 2018*)<sup>146</sup>, <b>more variability than stability in physician patient-centered behavior per patient</b> (N=1: Zandbelt et al., 2007)<sup>61</sup></p>                                                                                                                 | <p><b>Length of relationships with the doctor/familiarity</b> (N=3: Zandbelt et al., 2007; Pollak et al., 2010; Bylund &amp; Makoul, 2005)<sup>61, 179, 184</sup>, <b>general satisfaction with relationships with patients</b> (N=1: Carmel &amp; Glick, 1996)<sup>50</sup>, <b>emotional intensity of interaction</b> (N=1: Bylund &amp; Makoul, 2005)<sup>61, 179, 184</sup></p> | High confidence                                  | -                                 |

Green - low or medium risk of bias/Blue - not enough information/ Black - high RoB

\* - qualitative study

^ - mixed methods



Table 1: Summary of findings

| Domain description | Summary of review finding                                                                                                                                                                                                                                                                                                                                                                                                                 | Studies contributing to the review finding                                                                                                                                                                                                                                                                                                                                                                                                                                                                                                                                                                                                                                                                                                                                                                                                               |                                                                                                                                                                                                                                                                                                                                                                                                                                                                                                                                                                                                                                                                                              |                                                                                                                                                                                                                                                                                                                                                                                                                                                                                                                                                                                                                                                                                                                                                                                                                                                                                                                                     | CERQual assessment                               |                                                                                               |
|--------------------|-------------------------------------------------------------------------------------------------------------------------------------------------------------------------------------------------------------------------------------------------------------------------------------------------------------------------------------------------------------------------------------------------------------------------------------------|----------------------------------------------------------------------------------------------------------------------------------------------------------------------------------------------------------------------------------------------------------------------------------------------------------------------------------------------------------------------------------------------------------------------------------------------------------------------------------------------------------------------------------------------------------------------------------------------------------------------------------------------------------------------------------------------------------------------------------------------------------------------------------------------------------------------------------------------------------|----------------------------------------------------------------------------------------------------------------------------------------------------------------------------------------------------------------------------------------------------------------------------------------------------------------------------------------------------------------------------------------------------------------------------------------------------------------------------------------------------------------------------------------------------------------------------------------------------------------------------------------------------------------------------------------------|-------------------------------------------------------------------------------------------------------------------------------------------------------------------------------------------------------------------------------------------------------------------------------------------------------------------------------------------------------------------------------------------------------------------------------------------------------------------------------------------------------------------------------------------------------------------------------------------------------------------------------------------------------------------------------------------------------------------------------------------------------------------------------------------------------------------------------------------------------------------------------------------------------------------------------------|--------------------------------------------------|-----------------------------------------------------------------------------------------------|
|                    |                                                                                                                                                                                                                                                                                                                                                                                                                                           | Positive                                                                                                                                                                                                                                                                                                                                                                                                                                                                                                                                                                                                                                                                                                                                                                                                                                                 | Negative                                                                                                                                                                                                                                                                                                                                                                                                                                                                                                                                                                                                                                                                                     | No effect                                                                                                                                                                                                                                                                                                                                                                                                                                                                                                                                                                                                                                                                                                                                                                                                                                                                                                                           | CERQual assessment of confidence in the evidence | Explanation of CERQual assessment                                                             |
|                    | <p><b>Patient-doctor similarity</b> (N=8: quantitative=4, qualitative*=4): there is conflicting evidence of doctor-patient perceived similarity effect</p>                                                                                                                                                                                                                                                                                | <p><b>Doctor's perceived similarity of the patient to self or a close contact/relative</b> (N=1: <a href="#">Bayne et al., 2013*</a>)<sup>38</sup>, <b>gender concordance</b> (N=1: <a href="#">Wasserman et al., 1983</a>)<sup>117</sup>, <b>female gender concordance</b> (N=1: Bertakis &amp; Azari, 2012)<sup>178</sup>, <b>doctor's understanding of the patient culture</b> (N=1: Kirmayer, 2008*)<sup>126</sup></p>                                                                                                                                                                                                                                                                                                                                                                                                                               | <p><b>Doctor's perceived similarity of the patient to self or a close contact/relative</b> (N=2: <a href="#">Picard et al., 2016*</a>, Bessen et al., 2019*)<sup>93, 154</sup></p>                                                                                                                                                                                                                                                                                                                                                                                                                                                                                                           | <p><b>Gender</b> (N=2: Street, Gordon &amp; Haidet, 2007; Bertakis, 2011 and Bertakis &amp; Azari, 2012 (<i>same sample</i>), Bertakis &amp; Azari, 2012(<i>male gender</i>))<sup>101, 121, 178</sup>, <b>age</b> (N=1: Street, Gordon &amp; Haidet, 2007)<sup>121</sup> or <b>race concordance</b> (N=1: Street, Gordon &amp; Haidet, 2007)<sup>121</sup></p>                                                                                                                                                                                                                                                                                                                                                                                                                                                                                                                                                                      | <p><b>Low confidence</b></p>                     | <p>Due to serious concerns about methodological limitations, coherence, and data adequacy</p> |
|                    | <b>Patient factors (N=30, quantitative=17, qualitative=13)</b>                                                                                                                                                                                                                                                                                                                                                                            |                                                                                                                                                                                                                                                                                                                                                                                                                                                                                                                                                                                                                                                                                                                                                                                                                                                          |                                                                                                                                                                                                                                                                                                                                                                                                                                                                                                                                                                                                                                                                                              |                                                                                                                                                                                                                                                                                                                                                                                                                                                                                                                                                                                                                                                                                                                                                                                                                                                                                                                                     |                                                  |                                                                                               |
|                    | <p><b>Patient socio-demographic factors</b> (N=14: quantitative=10, qualitative*=4): there is a possibility of positive bias in providing compassionate care towards higher class (education/income) patients, or vulnerable populations (highly disadvantaged, elderly, children); there is a possibility of negative bias in providing compassionate care towards minorities (i.e. immigrants and people with language barrier) and</p> | <p><b>Higher educated</b> (N=2: Bertakis, 2011 and Bertakis &amp; Azari, 2012 (<i>same sample</i>); <a href="#">Batley et al., 2016*</a>)<sup>101, 138, 178</sup>, <b>higher income/ socio economic status</b> (N=2: <a href="#">Batley et al., 2016*</a>; Bertakis &amp; Azari, 2012)<sup>138, 178</sup>, <b>disadvantaged/impooverished</b> (N=2: <a href="#">Batley et al., 2016*</a>, Pollak et al., 2010)<sup>138, 179</sup>, <b>elderly</b> (N=3: <a href="#">Zandbelt et al., 2007</a>; <a href="#">Bayne et al., 2013*</a>; <a href="#">Batley et al., 2016*</a>)<sup>38, 61, 138</sup>, <b>children</b> (N=2: <a href="#">Bayne et al., 2013*</a>; <a href="#">Batley et al., 2016*</a>)<sup>38, 138</sup>, <b>locals (non-immigrants)</b> (N=1: Meeuwesen et al., 2006)<sup>174</sup>, <b>Whites</b> (N=1: Foo et al., 2017)<sup>112</sup></p> | <p><b>Different language/language barrier</b> (N=2: <a href="#">Bayne et al., 2013*</a>; <a href="#">Handford et al., 2013</a>)<sup>38, 40</sup>, <b>immigrants</b> (N=2: <a href="#">Porthé et al., 2018*</a>, Meeuwesen et al., 2006)<sup>159, 174</sup>, <b>Black/African-American</b> (N=2: Park et al., 2018 (<i>HIV context</i>); Street, Gordon &amp; Haidet, 2007 (<i>vs White only</i>))<sup>121, 181</sup>, <b>minority</b> (N=1: Foo et al., 2017)<sup>112</sup>, <b>"Enemy patients" (outgroup - during conflicts)</b> (N=1: Rubinstein &amp; Bentwich, 2017* (<i>patient who are in direct (military) conflict with the host, i.e. Palestinians/Syrians</i>))<sup>180</sup></p> | <p><b>Gender</b> (N=5: <a href="#">Zandbelt et al., 2007</a>; Pollak et al., 2010; Johnson Shen et al., 2019; Park et al., 2018; Bertakis, 2011 and Bertakis &amp; Azari, 2012 (<i>same sample</i>))<sup>61, 101, 176, 178, 179, 181</sup>, <b>age</b> (N=4: Johnson Shen et al., 2019; Park et al., 2018; Street, Gordon &amp; Haidet, 2007; Bertakis, 2011 and Bertakis &amp; Azari, 2012 (<i>same sample</i>))<sup>101, 121, 176, 178, 181</sup>, <b>race/ethnicity</b> (N=3: Pollak et al., 2010; Johnson Shen et al., 2019; Street, Gordon &amp; Haidet, 2007 (<i>Hispanic vs White</i>))<sup>121, 176, 179</sup>, <b>education</b> (N=2: Pollak et al., 2010; Street, Gordon &amp; Haidet, 2007)<sup>121, 179</sup>, <b>income</b> (N=1: Bertakis, 2011)<sup>101</sup>, <b>primary language</b> (N=1: <a href="#">Zandbelt et al., 2007</a>)<sup>61</sup>, <b>marital status</b> (N=1: Pollak et al., 2010)<sup>179</sup></p> | <p><b>Moderate confidence</b></p>                | <p>Due to moderate concerns about methodological limitations, coherence, and relevance</p>    |

Green - low or medium risk of bias/Blue - not enough information/ Black - high RoB

\* - qualitative study

^ - mixed methods

Table 1: Summary of findings

| Domain description | Summary of review finding                                                                                                                                                                                                                                                                                                                                                                                                                                                                                                                       | Studies contributing to the review finding                                                                                                                                                                                                                                                                                                                                                                                                                                                                                                                                                                                                                                                                                                                                                                                                                                                                                                                                                                                                                                                                                                                                                                                                               |                                                                                                                                                                                                                                                                                                                                                                                                                                                                                                                                                                                                                                                                                                                                                                                                                                                                                                                                                                                                                                                                                                                                                                                                                                                                                                                                                                                                                                                                                                                                                                                                                                                                                                                                                                                                                                                                                                                                                                                                                                                                                                                                                                                                                      |                                                                                                                                                                                                                                                                                                                                                                                                                                                                                                                                                      | CERQual assessment                               |                                                |
|--------------------|-------------------------------------------------------------------------------------------------------------------------------------------------------------------------------------------------------------------------------------------------------------------------------------------------------------------------------------------------------------------------------------------------------------------------------------------------------------------------------------------------------------------------------------------------|----------------------------------------------------------------------------------------------------------------------------------------------------------------------------------------------------------------------------------------------------------------------------------------------------------------------------------------------------------------------------------------------------------------------------------------------------------------------------------------------------------------------------------------------------------------------------------------------------------------------------------------------------------------------------------------------------------------------------------------------------------------------------------------------------------------------------------------------------------------------------------------------------------------------------------------------------------------------------------------------------------------------------------------------------------------------------------------------------------------------------------------------------------------------------------------------------------------------------------------------------------|----------------------------------------------------------------------------------------------------------------------------------------------------------------------------------------------------------------------------------------------------------------------------------------------------------------------------------------------------------------------------------------------------------------------------------------------------------------------------------------------------------------------------------------------------------------------------------------------------------------------------------------------------------------------------------------------------------------------------------------------------------------------------------------------------------------------------------------------------------------------------------------------------------------------------------------------------------------------------------------------------------------------------------------------------------------------------------------------------------------------------------------------------------------------------------------------------------------------------------------------------------------------------------------------------------------------------------------------------------------------------------------------------------------------------------------------------------------------------------------------------------------------------------------------------------------------------------------------------------------------------------------------------------------------------------------------------------------------------------------------------------------------------------------------------------------------------------------------------------------------------------------------------------------------------------------------------------------------------------------------------------------------------------------------------------------------------------------------------------------------------------------------------------------------------------------------------------------------|------------------------------------------------------------------------------------------------------------------------------------------------------------------------------------------------------------------------------------------------------------------------------------------------------------------------------------------------------------------------------------------------------------------------------------------------------------------------------------------------------------------------------------------------------|--------------------------------------------------|------------------------------------------------|
|                    |                                                                                                                                                                                                                                                                                                                                                                                                                                                                                                                                                 | Positive                                                                                                                                                                                                                                                                                                                                                                                                                                                                                                                                                                                                                                                                                                                                                                                                                                                                                                                                                                                                                                                                                                                                                                                                                                                 | Negative                                                                                                                                                                                                                                                                                                                                                                                                                                                                                                                                                                                                                                                                                                                                                                                                                                                                                                                                                                                                                                                                                                                                                                                                                                                                                                                                                                                                                                                                                                                                                                                                                                                                                                                                                                                                                                                                                                                                                                                                                                                                                                                                                                                                             | No effect                                                                                                                                                                                                                                                                                                                                                                                                                                                                                                                                            | CERQual assessment of confidence in the evidence | Explanation of CERQual assessment              |
|                    | Black/African-American patients; patients' gender, age and marital status show no effect on compassion                                                                                                                                                                                                                                                                                                                                                                                                                                          |                                                                                                                                                                                                                                                                                                                                                                                                                                                                                                                                                                                                                                                                                                                                                                                                                                                                                                                                                                                                                                                                                                                                                                                                                                                          |                                                                                                                                                                                                                                                                                                                                                                                                                                                                                                                                                                                                                                                                                                                                                                                                                                                                                                                                                                                                                                                                                                                                                                                                                                                                                                                                                                                                                                                                                                                                                                                                                                                                                                                                                                                                                                                                                                                                                                                                                                                                                                                                                                                                                      |                                                                                                                                                                                                                                                                                                                                                                                                                                                                                                                                                      |                                                  |                                                |
|                    | <p><b>Patient behavior/emotions</b> (N=19, quantitative=8, qualitative*=11): cooperative, thankful patients are more likely to receive compassionate care, while uncooperative patients with problematic behavior (e.g. anger, aggression, entitlement), patients who cross moral boundaries (i.e. drug dealers, abusers), or patients who lack understanding and do not express emotions (worse communicators) are less likely to receive compassionate care; patients preferences, self-efficacy, or distress possibly have little effect</p> | <p><b>Understanding/cooperative</b> (N=2: <a href="#">Porthé et al., 2018*</a>; <a href="#">Batley et al., 2016*</a>)<sup>138, 159</sup>, <b>thankful/more satisfied with care</b> (N=2: <a href="#">Picard et al., 2016*</a>; <a href="#">Street, Gordon &amp; Haidet, 2007</a>)<sup>93, 121</sup>, <b>receptive of compassion/empathy</b> (N=2: <a href="#">Bayne et al., 2013*</a>; <a href="#">Roze des Ordonns et al., 2020*</a>)<sup>38, 167</sup>, <b>positive affect/ positively valenced empathic opportunities</b> (N=2: <a href="#">Street, Gordon &amp; Haidet, 2007</a>; <a href="#">Bylund &amp; Makoul, 2005</a>)<sup>121, 184</sup>, <b>quiet and polite</b> (N=1: <a href="#">Batley et al., 2016*</a>)<sup>138</sup>, <b>better communicators</b> (N=1: <a href="#">Street, Gordon &amp; Haidet, 2007</a>)<sup>121</sup>, <b>highly concerned mothers</b> (N=1: <a href="#">Wasserman et al., 1983</a>)<sup>117</sup>, <b>sad patients</b> (N=1: <a href="#">Kennifer et al., 2009</a>)<sup>175</sup>, <b>"difficult patients"</b> (N=1: <a href="#">Anandarajah &amp; Roseman, 2014*</a>)<sup>136</sup>, <b>patients with more severe or moderately severe emotion</b> (N=1: <a href="#">Kennifer et al., 2009</a>)<sup>175</sup></p> | <p><b>Aggressive/violent</b> (N=2: <a href="#">Porthé et al., 2018*</a>; <a href="#">Derksen et al., 2015*</a>, <a href="#">2016*</a> (same sample))<sup>87, 149, 159</sup>, <b>angry</b> (N=3: <a href="#">Bayne et al., 2013*</a>; <a href="#">Sandikci et al., 2017</a>; <a href="#">Lyness, 1993*</a>), <b>patients who cross moral boundaries</b> (i.e. actively engaging in sexual abuse, child abuse, or drug dealing) (N=1: <a href="#">Derksen et al., 2015*</a>, <a href="#">2016*</a> (same sample))<sup>38, 102, 147</sup>, <b>demanding/nagging/entitled patients with high expectations</b> (N=2: <a href="#">Porthé et al., 2018*</a>, <a href="#">Batley et al., 2016*</a>)<sup>138, 159</sup>, <b>low compliance</b> (N=2: <a href="#">Baker et al., 2018*</a>, <a href="#">Lyness, 1993</a>)<sup>147, 151</sup>, other behaviors such as: <b>unpleasant or amoral behavior</b> (N=1: <a href="#">Derksen et al., 2018*</a>)<sup>146</sup>, <b>argumentative</b> (N=1: <a href="#">Derksen et al., 2016*</a>)<sup>149</sup>, <b>uncooperative</b> (N=1: <a href="#">Batley et al., 2016*</a>)<sup>138</sup>, <b>disrespectful</b> (N=1: <a href="#">Batley et al., 2016*</a>)<sup>138</sup>, <b>unthankful</b> (N=1: <a href="#">Picard et al., 2016*</a>), <b>dissatisfied with care</b> (N=1: <a href="#">Street, Gordon &amp; Haidet, 2007</a>)<sup>121</sup>, <b>negatively valenced empathic opportunities</b> (N=1: <a href="#">Bylund &amp; Makoul, 2005</a>)<sup>184</sup>, <b>high anxiety</b> (N=1: <a href="#">Sandikci et al., 2017</a>)<sup>102</sup>, <b>fear</b> (N=1: <a href="#">Kennifer et al., 2009</a>)<sup>175</sup>, <b>less effective communicators</b> (N=1: <a href="#">Street, Gordon &amp; Haidet, 2007</a>)<sup>121</sup>, <b>patients who are unfamiliar with medical terminology may lack full understanding of treatment options</b> (N=2: <a href="#">Bayne et al., 2013*</a>, <a href="#">van Hoorn et al., 2019</a>)<sup>38, 173</sup>, <b>emotionally distant</b> (what do they want? difficult to read - esp. older males of "rough-diamond" type) (N=1: <a href="#">Derksen et al., 2016*</a>)<sup>149</sup>, <b>patients who do not disclose lack of</b></p> | <p><b>Patient distress</b> (N=1: <a href="#">Johnson Shen et al., 2019</a>)<sup>176</sup>, <b>patient stigma</b> (lung cancer context) (N=1: <a href="#">Johnson Shen et al., 2019</a>)<sup>176</sup>, <b>self-efficacy in medical interactions</b> (N=1: <a href="#">Zandbelt et al., 2007</a>)<sup>61</sup>, <b>preference for participation in decision making</b> (N=1: <a href="#">Zandbelt et al., 2007</a>)<sup>61</sup>, <b>information preference</b> (detailed/not detailed) (N=1: <a href="#">Zandbelt et al., 2007</a>)<sup>61</sup></p> | <p><b>Moderate confidence</b></p>                | <p>Due to moderate concerns in all domains</p> |

Green - low or medium risk of bias/Blue - not enough information/ Black - high RoB

\* - qualitative study

^ - mixed methods

Table 1: Summary of findings

| Domain description | Summary of review finding                                                                                                                                                                                 | Studies contributing to the review finding                                                                                                                                            |                                                                                                                                                                                                                                                                                                                                                                                                                                                                                                                                                                                                                                                                                                                                                                                                                                                                                                                                                                                                                                                                                                                                                   |                                                                                                                          | CERQual assessment                               |                                                                                                                               |
|--------------------|-----------------------------------------------------------------------------------------------------------------------------------------------------------------------------------------------------------|---------------------------------------------------------------------------------------------------------------------------------------------------------------------------------------|---------------------------------------------------------------------------------------------------------------------------------------------------------------------------------------------------------------------------------------------------------------------------------------------------------------------------------------------------------------------------------------------------------------------------------------------------------------------------------------------------------------------------------------------------------------------------------------------------------------------------------------------------------------------------------------------------------------------------------------------------------------------------------------------------------------------------------------------------------------------------------------------------------------------------------------------------------------------------------------------------------------------------------------------------------------------------------------------------------------------------------------------------|--------------------------------------------------------------------------------------------------------------------------|--------------------------------------------------|-------------------------------------------------------------------------------------------------------------------------------|
|                    |                                                                                                                                                                                                           | Positive                                                                                                                                                                              | Negative                                                                                                                                                                                                                                                                                                                                                                                                                                                                                                                                                                                                                                                                                                                                                                                                                                                                                                                                                                                                                                                                                                                                          | No effect                                                                                                                | CERQual assessment of confidence in the evidence | Explanation of CERQual assessment                                                                                             |
|                    |                                                                                                                                                                                                           |                                                                                                                                                                                       | <b>understanding</b> (N=1: <a href="#">Bayne et al., 2013*</a> ) <sup>38</sup> , <b>patients with less severe emotion</b> (N=1: <a href="#">Kennifer et al., 2009</a> ) <sup>175</sup> , <b>legal undertone</b> (N=1: <a href="#">Derksen et al., 2018*</a> ) <sup>146</sup>                                                                                                                                                                                                                                                                                                                                                                                                                                                                                                                                                                                                                                                                                                                                                                                                                                                                      |                                                                                                                          |                                                  |                                                                                                                               |
|                    | <b>Doctor's perception of patients' motives</b> (N=7: quantitative=4, qualitative*=3): physician's negative perceptions of patient's motives and personality are likely to undermine ECRCs                | <b>Patient progress / likelihood of treatment adherence</b> (N=2: <a href="#">Johnson Shen et al., 2019</a> ; <a href="#">Street, Gordon &amp; Haidet, 2007</a> ) <sup>121, 176</sup> | <b>Patients who "waste time"</b> (e.g. taking time away from those who come in with conditions they didn't contribute to themselves, patients who are seen to have caused/ contributed to their illness) (N=2: <a href="#">Batley et al., 2016*</a> ; <a href="#">Stein, 1986</a> ) <sup>138, 177</sup> , <b>manipulative/ lying, patients who have other intentions</b> (e.g. drug seeking or malingering behaviors)/ <b>physicians' low trust in patient data</b> (N=3: <a href="#">Bayne et al., 2013*</a> ; <a href="#">Sandikci et al., 2017</a> ; <a href="#">Psyhojos, 2017</a> ) <sup>38, 102, 108</sup> , <b>attention seeking</b> (N=2: <a href="#">Batley et al., 2016*</a> ) <sup>138</sup> , <b>patients who exaggerate their symptoms</b> (N=1: <a href="#">Batley et al., 2016*</a> ) <sup>138</sup> , <b>egoistic</b> (N=1: <a href="#">Batley et al., 2016*</a> ) <sup>138</sup> , <b>"VIP" patients</b> (those with connections with senior doctors in the institution, politicians, or the wealthy who are pulling strings and not caring for the lives of others) (N=1: <a href="#">Batley et al., 2016*</a> ) <sup>138</sup> |                                                                                                                          | <b>Low confidence</b>                            | Due to serious concerns about relevance, and moderate concerns about methodological limitations, coherence, and data adequacy |
|                    | <b>Patient family</b> (N=2: qualitative* and quantitative): there is insufficient amount of evidence to make conclusions about the family influence, but it appears similar to that of patients' behavior | <b>Having family members who are fun, hospitable, and appreciative</b> (N=1: <a href="#">Batley et al., 2016*</a> ) <sup>138</sup>                                                    | <b>Intrusive/interrogative family members with no situational awareness</b> (N=1: <a href="#">Batley et al., 2016*</a> ) <sup>138</sup>                                                                                                                                                                                                                                                                                                                                                                                                                                                                                                                                                                                                                                                                                                                                                                                                                                                                                                                                                                                                           | <b>Closeness of the relative to the patient</b> (N=1: <a href="#">Cicekci et al., 2017 (ICU context)</a> ) <sup>95</sup> | <b>Low confidence</b>                            | Due to serious concerns about coherence, data adequacy, and relevance, and moderate concerns about methodological limitations |

Green - low or medium risk of bias/Blue - not enough information/ Black - high RoB

\* - qualitative study

^ - mixed methods

Table 1: Summary of findings

| Domain description | Summary of review finding                                                                                                                                                                                                       | Studies contributing to the review finding                                                                                                                                                                                        |                                                                                                                                                                                                                                                                                                                                                                                                                                                                                                                           |                                                                                                                                                                                                                                                                                                                                                       | CERQual assessment                               |                                                                                                                               |
|--------------------|---------------------------------------------------------------------------------------------------------------------------------------------------------------------------------------------------------------------------------|-----------------------------------------------------------------------------------------------------------------------------------------------------------------------------------------------------------------------------------|---------------------------------------------------------------------------------------------------------------------------------------------------------------------------------------------------------------------------------------------------------------------------------------------------------------------------------------------------------------------------------------------------------------------------------------------------------------------------------------------------------------------------|-------------------------------------------------------------------------------------------------------------------------------------------------------------------------------------------------------------------------------------------------------------------------------------------------------------------------------------------------------|--------------------------------------------------|-------------------------------------------------------------------------------------------------------------------------------|
|                    |                                                                                                                                                                                                                                 | Positive                                                                                                                                                                                                                          | Negative                                                                                                                                                                                                                                                                                                                                                                                                                                                                                                                  | No effect                                                                                                                                                                                                                                                                                                                                             | CERQual assessment of confidence in the evidence | Explanation of CERQual assessment                                                                                             |
|                    |                                                                                                                                                                                                                                 | <b>Situational factors (N=8, quantitative=6, qualitative=1, mixed methods=1)</b>                                                                                                                                                  |                                                                                                                                                                                                                                                                                                                                                                                                                                                                                                                           |                                                                                                                                                                                                                                                                                                                                                       |                                                  |                                                                                                                               |
|                    | The evidence in relation to situational factors is of low quality, and scarce - insufficient to make conclusions about the effect                                                                                               | <b>Empathic opportunities</b> (N=2: Epstein et al., 2007; Bylund & Makoul, 2005) <sup>184, 185</sup> , <b>speaking to patients' relatives 5-10min (not less)</b> (N=1: Cicekci et al., 2017 ( <i>ICU context</i> )) <sup>95</sup> | <b>Time consuming emotional issues/challenges during the diagnosis conversation</b> (N=3: Johnson Shen et al., 2019; Park et al., 2018; Polonsky et al., 2014) <sup>176, 181, 183</sup> , <b>speaking to patients' relatives less than 5min</b> (N=1: Cicekci et al., 2017 ( <i>ICU context</i> )) <sup>95</sup> , <b>patients where there is a conflict in maintaining confidentiality while protecting risk the patient or community</b> (N=1: Battegay et al., 1991* ( <i>contact tracing in HIV</i> )) <sup>182</sup> | <b>Presence of 3rd person (relative)</b> (N=1: Zandbelt et al., 2007) <sup>61</sup> , <b>speaking to patients' relatives for more than 10min</b> (N=1: Cicekci et al., 2017 ( <i>ICU context</i> )) <sup>95</sup> , <b>frequency of patients' relative speaking to the physician</b> (N=1: Cicekci et al., 2017 ( <i>ICU context</i> )) <sup>95</sup> | <b>Very low confidence</b>                       | Due to serious concerns in all domains                                                                                        |
|                    |                                                                                                                                                                                                                                 | <b>Clinical factors (N=23, quantitative=13, qualitative=10)</b>                                                                                                                                                                   |                                                                                                                                                                                                                                                                                                                                                                                                                                                                                                                           |                                                                                                                                                                                                                                                                                                                                                       |                                                  |                                                                                                                               |
| <b>CLINICAL</b>    | (articles = 23, quantitative = 13, qualitative = 10)<br><b>Pain</b> (N=5, quantitative=4, qualitative*=1): there is too little evidence to make conclusions, however, type and performance of pain might be important for ECRCs | <b>Patients with visible pain</b> (N=1: Paul-Savoie et al., 2018) <sup>44</sup> or <b>cancer-related pain</b> (N=1: Roth, Burgess & Mahowald, 2007) <sup>187</sup>                                                                | <b>Patient's "wrong" performance of pain</b> (N=1: Baker et al., 2018*) <sup>151</sup> , <b>patients with less visible pain signs</b> (N=1: Paul-Savoie et al., 2018) <sup>44</sup> - <i>both studies in a context of chronic pain</i>                                                                                                                                                                                                                                                                                    | <b>Presence of pain</b> (N=1: Bertakis, 2011*; Bertakis & Azari, 2012* ( <i>same sample</i> )) <sup>101, 178</sup> , <b>non-cancer pain</b> (e.g., lower backpain) (N=1: Roth, Burgess & Mahowald, 2007) <sup>187</sup>                                                                                                                               | <b>Very low confidence</b>                       | Due to serious concerns about methodological limitations, coherence, and data adequacy, and moderate concerns about relevance |

Green - low or medium risk of bias/Blue - not enough information/ Black - high RoB

\* - qualitative study

^ - mixed methods

Table 1: Summary of findings

| Domain description | Summary of review finding                                                                                                                                                                                                                                                 | Studies contributing to the review finding                                                                                                                                                                             |                                                                                                                                                                                                                                                                                                                                                                                                                                                                                                                                                                                                                                                                                                                                                                                                                                                                                                                                                                                                                                                                                                                                                                                                                                                                                                                                                                                                                                                                                                                                                                                                                          |                                                                                      | CERQual assessment                                                                                                                                |                                                                                                     |
|--------------------|---------------------------------------------------------------------------------------------------------------------------------------------------------------------------------------------------------------------------------------------------------------------------|------------------------------------------------------------------------------------------------------------------------------------------------------------------------------------------------------------------------|--------------------------------------------------------------------------------------------------------------------------------------------------------------------------------------------------------------------------------------------------------------------------------------------------------------------------------------------------------------------------------------------------------------------------------------------------------------------------------------------------------------------------------------------------------------------------------------------------------------------------------------------------------------------------------------------------------------------------------------------------------------------------------------------------------------------------------------------------------------------------------------------------------------------------------------------------------------------------------------------------------------------------------------------------------------------------------------------------------------------------------------------------------------------------------------------------------------------------------------------------------------------------------------------------------------------------------------------------------------------------------------------------------------------------------------------------------------------------------------------------------------------------------------------------------------------------------------------------------------------------|--------------------------------------------------------------------------------------|---------------------------------------------------------------------------------------------------------------------------------------------------|-----------------------------------------------------------------------------------------------------|
|                    |                                                                                                                                                                                                                                                                           | Positive                                                                                                                                                                                                               | Negative                                                                                                                                                                                                                                                                                                                                                                                                                                                                                                                                                                                                                                                                                                                                                                                                                                                                                                                                                                                                                                                                                                                                                                                                                                                                                                                                                                                                                                                                                                                                                                                                                 | No effect                                                                            | CERQual assessment of confidence in the evidence                                                                                                  | Explanation of CERQual assessment                                                                   |
|                    | <p><b>Injury/illness type</b> (N=12, quantitative=7, qualitative=5): it is difficult to make conclusions - the evidence is incoherent; broadly illness with more complex or psychosomatic symptomatology, or illness that is stigmatized seems to predict lower ECRCs</p> | <p><b>Accident victims</b> (N=1: <a href="#">Batley et al., 2016*</a>)<sup>138</sup>, <b>patients who had similar illnesses or conditions as the doctor</b> (N=1: <a href="#">Fox et al., 2009*</a>)<sup>128</sup></p> | <p><b>Patients with psychosomatic disease/psychological or social symptoms</b> (N=2: <a href="#">Butalid, Bensing &amp; Verhaak, 2014</a>; <a href="#">Sandikci et al., 2017</a>)<sup>102, 186</sup>, <b>more physical symptoms/multiple concerns</b> (N=1: <a href="#">Zandbelt et al., 2007</a>, <a href="#">Sandikci et al., 2017</a>)<sup>51, 102</sup>, <b>patients who had similar illnesses or conditions as the doctor</b> (N=1: <a href="#">Fox et al., 2009*</a>)<sup>128</sup>, <b>chronic illness</b> (N=1: <a href="#">Sandikci et al., 2017</a>)<sup>102</sup>, <b>patients with disgusting symptoms</b> (difficult to focus on the patient instead of the symptom) (N=1: <a href="#">Muggleton, Guy &amp; Howard, 2015*</a>)<sup>188</sup>, (predominantly) <b>biological explanations of mental health disorders</b> (N=1: <a href="#">Lebowitz &amp; Ahn, 2014</a>)<sup>189</sup>, <b>wrong fit of diagnoses with the department/specialization</b> (N=1: <a href="#">Batley et al., 2016*</a>)<sup>138</sup>, <b>patients with stigmatized condition</b> (HIV) as it is difficult to talk about for both the physician and the patient (N=1: <a href="#">Battegay et al., 1991*</a>)<sup>182</sup>, <b>Parkinson's</b> (incurable progressive disease) - inability to cure, gradually worsening personal and family crises, often over a long period of time, hard to accept that just being there, not contributing anything specifically medical to the encounter, was of value in itself, Parkinson's face provides one with little feedback (N=1: <a href="#">Pinder, 1992*</a>)<sup>152</sup></p> |                                                                                      | <p><b>Low confidence</b></p> <p>Due to serious concerns about methodological limitations and coherence, and moderate concerns about relevance</p> |                                                                                                     |
|                    | <p><b>Acuity/severity</b> (N=5: quantitative=2, qualitative*=3): non-acute patients who are getting better are less likely to receive ECRCs</p>                                                                                                                           | <p><b>High acuity/patient in critical state</b> (N=2: <a href="#">Batley et al., 2016*</a>, <a href="#">Bishop et al., 2014*</a>)<sup>138, 168</sup></p>                                                               | <p><b>Non-acute patients</b> (N=1: <a href="#">Batley et al., 2016*</a>)<sup>138</sup>, <b>patients who are getting better</b> (N=1: <a href="#">Bishop et al., 2014*</a>)<sup>168</sup> or, on the contrary, <b>high-pressure scenarios and life threatening medical conditions</b> (N=1: <a href="#">Bayne et al., 2013*</a>)<sup>38</sup>, <b>more severe condition</b> (N=1: <a href="#">Zandbelt et al., 2007</a>)<sup>61</sup></p>                                                                                                                                                                                                                                                                                                                                                                                                                                                                                                                                                                                                                                                                                                                                                                                                                                                                                                                                                                                                                                                                                                                                                                                 | <p><b>Case difficulty</b> (N=1: <a href="#">Passalacqua, 2011</a>)<sup>163</sup></p> |                                                                                                                                                   | <p><b>Moderate confidence</b></p> <p>Due to moderate concerns about coherence and data adequacy</p> |

Green - low or medium risk of bias/Blue - not enough information/ Black - high RoB

\* - qualitative study

^ - mixed methods

Table 1: Summary of findings

| Domain description | Summary of review finding                                                                                                                                                                                                    | Studies contributing to the review finding                                                                                                                                                                                                                                        |                                                                                                                                                                                                                                                                                                                                                                                                                                                                                                                                                                                                                          |                                                                                                                                                                                                                                                                                                                                                                                                                                                                                                                                                                                                                    | CERQual assessment                               |                                                                                                                               |
|--------------------|------------------------------------------------------------------------------------------------------------------------------------------------------------------------------------------------------------------------------|-----------------------------------------------------------------------------------------------------------------------------------------------------------------------------------------------------------------------------------------------------------------------------------|--------------------------------------------------------------------------------------------------------------------------------------------------------------------------------------------------------------------------------------------------------------------------------------------------------------------------------------------------------------------------------------------------------------------------------------------------------------------------------------------------------------------------------------------------------------------------------------------------------------------------|--------------------------------------------------------------------------------------------------------------------------------------------------------------------------------------------------------------------------------------------------------------------------------------------------------------------------------------------------------------------------------------------------------------------------------------------------------------------------------------------------------------------------------------------------------------------------------------------------------------------|--------------------------------------------------|-------------------------------------------------------------------------------------------------------------------------------|
|                    |                                                                                                                                                                                                                              | Positive                                                                                                                                                                                                                                                                          | Negative                                                                                                                                                                                                                                                                                                                                                                                                                                                                                                                                                                                                                 | No effect                                                                                                                                                                                                                                                                                                                                                                                                                                                                                                                                                                                                          | CERQual assessment of confidence in the evidence | Explanation of CERQual assessment                                                                                             |
|                    | <b>Terminal illness</b> (N=3, all qualitative*): the limited evidence does not allow to make conclusions                                                                                                                     | <b>Terminal condition/patients who will not get better</b> (N=2: <a href="#">Bayne et al., 2013*</a> ; <a href="#">Bishop et al., 2014*</a> ) <sup>38, 168</sup>                                                                                                                  | <b>Palliative care/EOL</b> (i.e., associations with death, emotionally difficult conversations, delayed referrals) (N=1: <a href="#">Bessen et al., 2019*</a> ) <sup>154</sup>                                                                                                                                                                                                                                                                                                                                                                                                                                           |                                                                                                                                                                                                                                                                                                                                                                                                                                                                                                                                                                                                                    | <b>Low confidence</b>                            | Due to serious concerns about data adequacy, and moderate concerns about methodological limitations and coherence             |
|                    | <b>Comorbidities</b> (N=8: quantitative=6, qualitative*=2): due to low quality of evidence it is hard to make conclusions; preliminary mental illness co-morbidity and substance use may potentially affect ECRCs negatively | <b>High patient self-reported physical health status</b> (N=1: <a href="#">Bertakis, 2011</a> and <a href="#">Bertakis &amp; Azari, 2012 (same sample)</a> ) <sup>101, 178</sup> , <b>patients with obesity</b> (N=1: <a href="#">Bertakis &amp; Azari, 2012</a> ) <sup>178</sup> | <b>Smokers</b> (N=1: <a href="#">Bertakis, 2011</a> and <a href="#">Bertakis &amp; Azari, 2012 (same sample)</a> ) <sup>101, 178</sup> , <b>co-presence of drug addiction</b> (N=1: <a href="#">Sandikci et al., 2017</a> ) <sup>102</sup> , <b>patients who have intellectual disabilities</b> - lack full understanding of treatment options (N=1: <a href="#">Bayne et al., 2013*</a> ) <sup>38</sup> , <b>patients with personality disorders</b> (N=1: <a href="#">Derksen et al., 2016*</a> ) <sup>149</sup> , <b>greater symptoms of depression</b> (N=1: <a href="#">van Hoorn et al., 2019</a> ) <sup>173</sup> | <b>Mental health/depression, anxiety</b> (N=1: <a href="#">Zandbelt et al., 2007</a> ) <sup>61</sup> , <b>smoking</b> (N=1: <a href="#">Johnson Shen et al., 2019 (in the context of lung cancer)</a> ) <sup>176</sup> , <b>high patient self-reported mental health</b> (N=1: <a href="#">Bertakis, 2011</a> and <a href="#">Bertakis &amp; Azari, 2012 (same sample)</a> ) <sup>101, 178</sup> , <b>BMI</b> (N=1: <a href="#">Bertakis, 2011</a> ) <sup>101</sup> , <b>alcohol abuse</b> (N=1: <a href="#">Bertakis, 2011</a> and <a href="#">Bertakis &amp; Azari, 2012 (same sample)</a> ) <sup>101, 178</sup> | <b>Low confidence</b>                            | Due to serious concerns about methodological limitations, and moderate concerns about coherence and relevance                 |
|                    | <b>Frequent presenters</b> (N=3, quantitative=2, qualitative*=1) the evidence is small and inconclusive; there is a possibility that frequent presentation may affect ECRCs negatively                                       |                                                                                                                                                                                                                                                                                   | <b>Frequent presenters</b> or patients with unresolved recurring problems (N=2: <a href="#">Batley et al., 2016*</a> , <a href="#">Sandikci et al., 2017</a> ) <sup>102, 138</sup>                                                                                                                                                                                                                                                                                                                                                                                                                                       | <b>Frequent presenters</b> (N=1: <a href="#">Zandbelt et al., 2007</a> ) <sup>61</sup>                                                                                                                                                                                                                                                                                                                                                                                                                                                                                                                             | <b>Low confidence</b>                            | Due to serious concerns about data adequacy, and moderate concerns about methodological limitations, coherence, and relevance |

Green - low or medium risk of bias/Blue - not enough information/ Black - high RoB

\* - qualitative study

^ - mixed methods

## References

38. Bayne H, Neukrug E, Hays D, Britton B. A comprehensive model for optimizing empathy in person-centered care. *Patient Educ Couns.* 2013;93(2):209-15.
39. Clara A, Merino J, Mateos E, Ysa A, Roman B, Vidal-Barraquer F, et al. The vascular surgeon facing clinical ethical dilemmas (the VASCUETHICS Study): 'V'-shaped association between compassionate attitudes and professional seniority. *Eur J Vasc Endovasc Surg.* 2006;31(6):594-9.
40. Handford C, Lemon J, Grimm MC, Vollmer-Conna U. Empathy as a function of clinical exposure - reading emotion in the eyes. *PLoS One.* 2013;8(6):e65159.
41. Julia-Sanchis R, Richart-Martinez M, Garcia-Aracil N, Jose-Alcaide L, Piquer-Donat T, Castejon-de-la-Encina ME. Measuring the levels of burnout syndrome and empathy of Spanish emergency medical service professionals. *Australas Emerg Care.* 2019;22(3):193-9.
42. Kataoka HU, Koide N, Hojat M, Gonnella JS. Measurement and correlates of empathy among female Japanese physicians. *BMC Med Educ.* 2012;12:48.
43. Katsari V, Tyritidou A, Domeyer PR, Giorgi G. Physicians' self-assessed empathy and patients' perceptions of physicians' empathy: validation of the Greek Jefferson scale of patient perception of physician empathy. *Biomed Res Int.* 2020;2020:9379756.
44. Paul-Savoie E, Bourgault P, Potvin S, Gosselin E, Lafrenaye S. The impact of pain invisibility on patient-centered care and empathetic attitude in chronic pain management. *Pain Res Manag.* 2018;2018:6375713.
45. Roberts LW, Warner TD, Moutier C, Geppert CMA, Green Hammond KA. Are doctors who have been ill more compassionate? Attitudes of resident physicians regarding personal health issues and the expression of compassion in clinical care. *Psychosomatics.* 2011;52(4):367-74.
46. Santamaria-Garcia H, Baez S, Garcia AM, Flichtentrei D, Prats M, Mastandueno R, et al. Empathy for others' suffering and its mediators in mental health professionals. *Sci Rep.* 2017;7(1):6391.
47. Shariat SV, Eshtad E, Ansari S. Empathy and its correlates in Iranian physicians: a preliminary psychometric study of the Jefferson Scale of Physician Empathy. *Med Teach.* 2010;32(10):e417-21.
48. Wolfshohl JA, Keegan Bradley CB, Bell S, Hodges C, Knowles H, Chaudhari BR, et al. Association between empathy and burnout among emergency medicine physicians. *J Clin Med Res.* 2019;11(7):532.
49. Bratek A, Bulska W, Bonk M, Seweryn M, Krysta K. Empathy among physicians, medical students and candidates. *Psychiatr Danub.* 2015;27 Suppl 1:S48-52.
50. Carmel S, Glick SM. Compassionate-empathic physicians: personality traits and social-organizational factors that enhance or inhibit this behavior pattern. *Soc Sci Med.* 1996;43(8):1253-61.
51. Charles JA, Ahnfeldt-Mollerup P, Sondergaard J, Kristensen T. Empathy variation in general practice: a survey among general practitioners in Denmark. *Int J Environ Res Public Health.* 2018;15(3).
52. Gleichgerrcht E, Decety J. Empathy in clinical practice: how individual dispositions, gender, and experience moderate empathic concern, burnout, and emotional distress in physicians. *PLoS One.* 2013;8(4):e61526.
53. Jiao Y, Phillips MR, Sheng Y, Wu G, Li X, Xiong W, et al. Cross-sectional study of attitudes about suicide among psychiatrists in Shanghai. *BMC Psychiatry.* 2014;14:87.
54. Kondo K, Fujimori M, Shirai Y, Yamada Y, Ogawa A, Hizawa N, et al. Characteristics associated with empathic behavior in Japanese oncologists. *Patient Educ Couns.* 2013;93(2):350-3.
55. Kozeny J, Tisanska L. The structure of the Jefferson Scale of Physician Empathy in Czech physicians. *Cesk Psychol.* 2013;57(6):521-32.

## References

56. Lelorain S, Sultan S, Zenasni F, Catu-Pinault A, Jaury P, Boujut E, et al. Empathic concern and professional characteristics associated with clinical empathy in French general practitioners. *Eur J Gen Pract.* 2013;19(1):23-8.
57. Lown BA, Shin A, Jones RN. Can organizational leaders sustain compassionate, patient-centered care and mitigate burnout? *J Healthc Manag.* 2019;64(6):398-412.
58. Pollak KI, Arnold RM, Jeffreys AS, Alexander SC, Olsen MK, Abernethy AP, et al. Oncologist communication about emotion during visits with patients with advanced cancer. *J Clin Oncol.* 2007;25(36):5748-52.
59. Putrino N, Tabullo Á, Mesurado B, de Minzi MCR. Are there differences in health professionals' empathy due to academic and clinical experience? *Curr Psychol.* 2018.
60. Walocha E, Tomaszewska IM, Mizia E. Empathy level differences between Polish surgeons and physicians. *Folia Med Cracov.* 2013;53(1):47-54.
61. Zandbelt LC, Smets EMA, Oort FJ, Godfried MH, de Haes HCJM. Patient participation in the medical specialist encounter: does physicians' patient-centred communication matter? *Patient Educ Couns.* 2007;65(3):396-406.
62. Foreback J, Kusz H, Lepisto BL, Pawlaczyk B. Empathy in internal medicine residents at community-based hospitals: a cross-sectional study. *J Med Educ Curric Dev.* 2018;5.
63. Hong M, Bahn GH, Lee WH, Moon SJ. Empathy in Korean psychiatric residents. *Asia Pac Psychiatry.* 2011;3(2):83-90.
64. Park C, Lee YJ, Hong M, Jung C-H, Synn Y, Kwack Y-S, et al. A multicenter study investigating empathy and burnout characteristics in medical residents with various specialties. *J Korean Med Sci.* 2016;31(4):590-7.
65. Rawal S, Strahlendorf C, Nimmon L. Challenging the myth of the attrition of empathy in paediatrics residents. *Med Educ.* 2020;54(1):82-7.
66. Bellini LM, Baime M, Shea JA. Variation of mood and empathy during internship. *JAMA.* 2002;287(23):3143-6.
67. Bellini LM, Shea JA. Mood change and empathy decline persist during three years of internal medicine training. *Acad Med.* 2005;80(2):164-7.
68. Rosen IM, Gimotty PA, Shea JA, Bellini LM. Evolution of sleep quantity, sleep deprivation, mood disturbances, empathy, and burnout among interns. *Acad Med.* 2006;81(1):82-5.
69. West CP, Huntington JL, Huschka MM, Novotny PJ, Sloan JA, Kolars JC, et al. A prospective study of the relationship between medical knowledge and professionalism among internal medicine residents. *Acad Med.* 2007;82(6):587-92.
70. Greenberg L, Agrawal D, Toto R, Blatt B. Empathy, sense of power, and personality: do they change during pediatric residency? *South Med J.* 2015;108(8):471-4.
71. Khajavi F, Hekmat H. A comparative study of empathy: the effects of psychiatric training. *Arch Gen Psychiatry.* 1971;25(6):490-3.
72. Lee PT, Loh J, Sng G, Tung J, Yeo KK. Empathy and burnout: a study on residents from a Singapore institution. *Singapore Med J.* 2018;59(1):50-4.
73. Mangione S, Kane GC, Caruso JW, Gonnella JS, Nasca TJ, Hojat M. Assessment of empathy in different years of internal medicine training. *Med Teach.* 2002;24(4):370-3.
74. Petrahai SK, Nwangwu JT. A study of empathy in emergency medicine residents at a Connecticut residency program [M.P.H.]. *Ann Arbor: Southern Connecticut State University;* 2003.
75. Reed S, Kemper KJ, Schwartz A, Batra M, Staples BB, Serwint JR, et al. Variability of burnout and stress measures in pediatric residents: an exploratory single-center study from the pediatric resident burnout-resilience study consortium. *J Evid Based Integr Med.* 2018;23:2515690X18804779.



## References

76. Saguem BN, Bouzaâbia Z, Braham A, Nasr SB. Empathic abilities and their mediators in Tunisian psychiatry trainees. *J Ment Health Train Educ Pract.* 2020.
77. Shanafelt TD, West C, Zhao X, Novotny P, Kolars J, Habermann T, et al. Relationship between increased personal well-being and enhanced empathy among internal medicine residents. *J Gen Intern Med.* 2005;20(7):559-64.
78. Brady C, Bambury RM, O'Reilly S. Empathy and the wounded healer: a mixed-method study of patients and doctors views on empathy. *Ir Med J.* 2015;108(4):125-6.
79. Di Lillo M, Cicchetti A, Lo Scalzo A, Taroni F, Hojat M. The Jefferson Scale of Physician Empathy: preliminary psychometrics and group comparisons in Italian physicians. *Acad Med.* 2009;84(9):1198-202.
80. Moriarty A, Nearchou F, Byrne M, Cullen W, Hennessy E. General practitioners' training and their attitudes towards young people who self-harm: a cross-sectional survey. *Early Interv Psychiatry.* 2020.
81. Suh DH, Hong JS, Lee DH, Gonnella JS, Hojat M. The Jefferson Scale of Physician Empathy: a preliminary psychometric study and group comparisons in Korean physicians. *Med Teach.* 2012;34(6):e464-8.
82. Zenasni F, Boujut E, Buffel du Vaure C, Catu-Pinault A, Tavani JL, Rigal L, et al. Development of a French-language version of the Jefferson Scale of Physician Empathy and association with practice characteristics and burnout in a sample of general practitioners. *Int J Pers Cent Med.* 2012;2(4):759-66.
83. Cyrus A, Salehi B, Naziri M, Sedeh BS, Vosoulie R. Empathic communication and essential instruction for medical students. *J Biol Today's World.* 2017;6(6):97-101.
84. Ferreira S, Afonso P, Ramos MDR. Empathy and burnout: a multicentre comparative study between residents and specialists. *J Eval Clin Pract.* 2020;26(1):216-22.
85. Jing D, Jin Y, Liu J. The impact of monetary incentives on physician prosocial behavior in online medical consulting platforms: evidence from China. *JMIR.* 2019;21(7):e14685.
86. Osim JH, Essien EA, Okegbe J, Udofia O. The Jefferson scale of physician empathy: a preliminary study of validity and reliability among physicians in Nigerian tertiary hospital. *Acta Medica International.* 2019;6(1):11-6.
87. Derksen F, Bensing J, Kuiper S, van Meerendonk M, Lagro-Janssen A. Empathy: what does it mean for GPs? A qualitative study. *Fam Pract.* 2015;32(1):94-100.
88. Pardeshi GS, Kadam D, Chandanwale A, Bollinger R, Deluca A. Resident doctors' attitudes toward tuberculosis patients. *Indian J Tuberc.* 2017;64(2):89-92.
89. Chou CM, Kellom K, Shea JA. Attitudes and habits of highly humanistic physicians. *Acad Med.* 2014;89(9):1252-8.
90. Swendiman RA, Marcaccio CL, Han J, Hoffman DI, Weiner TM, Nance ML, et al. Attitudes and habits of highly humanistic surgeons: a single-institution, mixed-methods study. *Acad Med.* 2019;94(7):1027-32.
91. West CP, Huschka MM, Novotny PJ, Sloan JA, Kolars JC, Habermann TM, et al. Association of perceived medical errors with resident distress and empathy: a prospective longitudinal study. *JAMA.* 2006;296(9):1071-8.
92. Hojat M, Gonnella JS, Nasca TJ, Mangione S, Veloksi JJ, Magee M. The Jefferson Scale of Physician Empathy: Further psychometric data and differences by gender and specialty at item level. *Acad Med.* 2002;77(Suppl10):S58-S60.
93. Picard J, Catu-Pinault A, Boujut E, Botella M, Jaury P, Zenasni F. Burnout, empathy and their relationships: a qualitative study with residents in General Medicine. *Psychol Health Med.* 2016;21(3):354-61.

## References

94. Alcorta-Garza A, San-Martin M, Delgado-Bolton R, Soler-Gonzalez J, Roig H, Vivanco L. Cross-validation of the Spanish HP-version of the Jefferson scale of empathy confirmed with some cross-cultural differences. *Front Psychol.* 2016;7.
95. Cicekci F, Duran N, Ayhan B, Arican S, Ilban O, Kara I, et al. The communication between patient relatives and physicians in intensive care units. *BMC Anesthesiol.* 2017;17(1):97.
96. Hojat M, Gonnella JS, Nasca TJ, Mangione S, Vergare M, Magee M. Physician empathy: definition, components, measurement, and relationship to gender and specialty. *Am J Psychiatry.* 2002;159(9):1563-9.
97. Stanton C, Sethi FN, Dale O, Phelan M, Laban JT, Eliahoo J. Comparison of emotional intelligence between psychiatrists and surgeons. *Psychiatrist.* 2011;35(4):124-9.
98. Stratta EC, Riding DM, Baker P. Ethical erosion in newly qualified doctors: perceptions of empathy decline. *Int J Med Educ.* 2016;7:286-92.
99. Chaitoff A, Sun B, Windover A, Bokar D, Featherall J, Rothberg MB, et al. Associations between physician empathy, physician characteristics, and standardized measures of patient experience. *Acad Med.* 2017;92(10):1464-71.
100. Davidsen AS, Fosgerau CF. General practitioners' and psychiatrists' responses to emotional disclosures in patients with depression. *Patient Educ Couns.* 2014;95(1):61-8.
101. Bertakis KD, Azari R. Determinants and outcomes of patient-centered care. *Patient Educ Couns.* 2011;85(1):46-52.
102. Sandikci KB, Ustu Y, Sandikci MM, Kayhan Tetik B, Isik D, Ugurlu M. Attitudes and behaviors of physicians in dealing with difficult patients and relatives: a cross-sectional study in two training and research hospitals. *Turk J Med Sci.* 2017;47(1):222-33.
103. Paasche-Orlow M, Roter D. The communication patterns of internal medicine and family practice physicians. *J Am Board Fam Med.* 2003;16(6):485-93.
104. McFarland DC, Malone AK, Roth A. Acute empathy decline among resident physician trainees on a hematology-oncology ward: an exploratory analysis of house staff empathy, distress, and patient death exposure. *Psychooncology.* 2017;26(5):698-703.
105. McFarland DC, Roth A. Resilience of internal medicine house staff and its association with distress and empathy in an oncology setting. *Psychooncology.* 2017;26(10):1519-25.
106. Jin J, Li H, Song W, Jiang N, Zhao W, Wen D. The mediating role of psychological capital on the relation between distress and empathy of medical residents: a cross-sectional survey. *Med Educ Online.* 2020;25(1):1710326.
107. Mahoney S, Sladek RM, Neild T. A longitudinal study of empathy in pre-clinical and clinical medical students and clinical supervisors. *BMC Med Educ.* 2016;16(1):270.
108. Psychojos MA. Aging, empathy, and the Internet of Things: a measure of physician readiness to treat older adults: Massachusetts Institute of Technology; 2017.
109. Dhawan N, Steinbach AB, Halpern J. Physician empathy and compassion for inmate-patients in the correctional health care setting. *J Correct Health Care.* 2007;13(4):257-67.
110. Gatheshill G, Kucharska-Pietura K, Wattis J. Attitudes towards mental disorders and emotional empathy in mental health and other healthcare professionals. *Psychiatrist.* 2011;35(3):101-5.
111. Moralle MR, Preston JS, Chen L, Berberian WS. An exploratory study of empathy in resident physicians at an urban medical center. *Int J Caring Sci.* 2016;9(2):526-33.
112. Foo PK, Frankel RM, McGuire TG, Zaslavsky AM, Elston Lafata J, Ming T-S. Patient and physician race and the allocation of time and patient engagement efforts to mental health discussions in primary care: an observational study of audiorecorded periodic health examinations. *J Ambul Care Manage.* 2017;40(3):246-56.

## References

113. Bateman LB, White ML, Tofil NM, Clair JM, Needham BL. A qualitative examination of physician gender and parental status in pediatric end-of-life communication. *Health Commun.* 2017;32(7):903-9.
114. Bylund CL, Makoul G. Empathic communication and gender in the physician-patient encounter. *Patient Educ Couns.* 2002;48(3):207-16.
115. Dehning S, Reis E, Krause D, Gasperi S, Meyer S, Dargel S, et al. Empathy in high-tech and high-touch medicine. *Patient Educ Couns.* 2014;95(2):259-64.
116. Kliszcz J, Nowicka-Sauer K, Trzeciak B, Nowak P, Sadowska A. Empathy in health care providers--validation study of the Polish version of the Jefferson Scale of Empathy. *Adv Med Sci.* 2006;51:219-25.
117. Wasserman RC, Inui TS, Barriatua RD, Carter WB, Lippincott P. Responsiveness to maternal concern in preventive child health visits: an analysis of clinician-parent interactions. *J Dev Behav Pediatr.* 1983;4(3):171-6.
118. Borracci RA, Doval HC, Nunez C, Samarelli M, Tamini S, Tanus E. Measurement of empathy among Argentine cardiologists: Psychometrics and differences by age, gender, and subspecialty. *Cardiol J.* 2015;22(1):52-6.
119. Kobayasi R, Tempiski PZ, Arantes-Costa FM, Martins MA. Gender differences in the perception of quality of life during internal medicine training: a qualitative and quantitative analysis. *BMC Med Educ.* 2018;18(1):281.
120. Silvester J, Patterson F, Koczwara A, Ferguson E. "Trust me...": psychological and behavioral predictors of perceived physician empathy. *J Appl Psychol.* 2007;92(2):519-27.
121. Street Jr RL, Gordon H, Haidet P. Physicians' communication and perceptions of patients: is it how they look, how they talk, or is it just the doctor? *Soc Sci Med.* 2007;65(3):586-98.
122. Avasarala SK, Whitehouse S, Drake SM. Internship and empathy: variations across time and specialties. *South Med J.* 2015;108(10):591-5.
123. Komisar J, McFarland DC. Is empathy associated with a self-ascribed sense of meaning among resident physicians working with patients nearing the end of life on a hematology-oncology ward? *Psychooncology.* 2017;26(9):1403-6.
124. Yuguero O, Ramon Marsal J, Esquerda M, Vivanco L, Soler-Gonzalez J. Association between low empathy and high burnout among primary care physicians and nurses in Lleida, Spain. *Eur J Gen Pract.* 2017;23(1):4-10.
125. Epstein RM, Borrell i Carrio F. Pudor, honor, and autoridad: the evolving patient-physician relationship in Spain. *Patient Educ Couns.* 2001;45(1):51-7.
126. Kirmayer LJ. Empathy and alterity in cultural psychiatry. *Ethos.* 2008;36(4):457-74.
127. Haider SI, Riaz Q, Gill RC. Empathy in clinical practice: a qualitative study of early medical practitioners and educators. *J Pak Med Assoc.* 2020;70(1):116-22.
128. Fox FE, Rodham KJ, Harris MF, Taylor GJ, Sutton J, Scott J, et al. Experiencing "the other side": a study of empathy and empowerment in general practitioners who have been patients. *Qual Health Res.* 2009;19(11):1580-8.
129. Jaye C, Wilson H. When general practitioners become patients. *Health (London).* 2003;7(2):201-25.
130. Penssek L, Selic P. Empathy and burnout in Slovenian family medicine doctors: the first presentation of Jefferson scale of empathy results. *Zdr Varst.* 2018;57(3):155-65.
131. Uygur J, Brown JB, Herbert C. Understanding compassion in family medicine: a qualitative study. *Br J Gen Pract.* 2019;69(680):e208-e16.
132. Woolf K, Cave J, McManus IC, Dacre JE. 'It gives you an understanding you can't get from any book.' The relationship between medical students' and doctors' personal illness experiences and their performance: a qualitative and quantitative study. *BMC Med Educ.* 2007;7:50.

## References

133. Batton B, Verhulst S, Batton D, Davis A, Collin M, Walsh M. Perspectives of physician parents in the NICU. *Child Health Care*. 2011;40(4):326-43.
134. Krenek RJ, Zalewski C. Psychiatric illness in families of mental health professionals: relationship to career choice and self-perceived therapeutic variables. *J Soc Behav Pers*. 1993;8(3):439-52.
135. Wohlgenuth CM, Auerbach HP, Parker VA. Advantages and challenges: the experience of geriatrics health care providers as family caregivers. *Gerontologist*. 2015;55(4):595-604.
136. Anandarajah G, Roseman JL. A qualitative study of physicians' views on compassionate patient care and spirituality: medicine as a spiritual practice? *R I Med J* (2013). 2014;97(3):17-22.
137. Pawlikowski J, Sak JJ, Marczewski K. Physicians' religiosity and attitudes towards patients. *Ann Agric Environ Med*. 2012;19(3):503-7.
138. Batley NJ, Nasreddine Z, Chami A, Zebian D, Bachir R, Abbas HA. Cynicism and other attitudes towards patients in an emergency department in a middle eastern tertiary care center. *BMC Med Educ*. 2016;16:36.
139. Gottenborg E, Maw A, Ngov LK, Burden M, Ponomaryova A, Jones CD. You can't have it all: the experience of academic hospitalists during pregnancy, parental leave, and return to work. *J Hosp Med*. 2018;13(12):836-9.
140. Fulop E, Devecsery A, Hausz K, Kovacs Z, Csabai M. Relationship between empathy and burnout among psychiatric residents. *New Medicine*. 2011;2011-January(4):143-7.
141. Hojat M, Mangione S, Nasca TJ, Gonnella JS, Magee M. Empathy scores in medical school and ratings of empathic behavior in residency training 3 years later. *J Soc Psychol*. 2005;145(6):663-72.
142. Aomatsu M, Otani T, Tanaka A, Ban N, van Dalen J. Medical students' and residents' conceptual structure of empathy: a qualitative study. *Educ Health (Abingdon)*. 2013;26(1):4-8.
143. Muslin HL, Schlessinger N. Toward the teaching and learning of empathy. *Bull Menninger Clin*. 1971;35(4):262-71.
144. Scott E. A positively embodied approach to psychotherapy. *Women Ther*. 2019;42(1-2):131-46.
145. Peng J, Clarkin C, Doja A. Uncovering cynicism in medical training: a qualitative analysis of medical online discussion forums. *BMJ Open*. 2018;8(10):e022883.
146. Derksen FAWM, Olde Hartman T, Bensing J, Lagro-Janssen A. Empathy in general practice-the gap between wishes and reality: comparing the views of patients and physicians. *Fam Pract*. 2018;35(2):203-8.
147. Lyness Richard DA. Physicians' use of empathy in response to patients' emotional concerns. *Diss Abstr Int*. 1993;54(2-A):463-4.
148. Branch WT, Jr., Weil AB, Gilligan MC, Litzelman DK, Hafler JP, Plews-Ogan M, et al. How physicians draw satisfaction and overcome barriers in their practices: "It sustains me". *Patient Educ Couns*. 2017;100(12):2320-30.
149. Derksen FA, Olde Hartman TC, Bensing JM, Lagro-Janssen AL. Managing barriers to empathy in the clinical encounter: a qualitative interview study with GPs. *Br J Gen Pract*. 2016;66(653):e887-e95.
150. Ross R. "This will only hurt a bit" evaluating the usage of patient focused empathy amongst general surgery residents [Psy.D.]. *Ann Arbor: Rutgers The State University of New Jersey, Graduate School of Applied and Professional Psychology*; 2017.
151. Baker LR, Martimianakis MAT, Nasirzadeh Y, Northup E, Gold K, Friesen F, et al. Compassionate care in the age of evidence-based practice: a critical discourse analysis in the context of chronic pain care. *Acad Med*. 2018;93(12):1841-9.

## References

152. Pinder R. Striking balances: detachment or empathy in the management of Parkinson's disease? *Fam Pract*. 1992;9(3):274-8.
153. Ahrweiler F, Neumann M, Goldblatt H, Hahn EG, Scheffer C. Determinants of physician empathy during medical education: hypothetical conclusions from an exploratory qualitative survey of practicing physicians. *BMC Med Educ*. 2014;14:122.
154. Bessen S, Jain RH, Brooks WB, Mishra M. "Sharing in hopes and worries"-a qualitative analysis of the delivery of compassionate care in palliative care and oncology at end of life. *Int J Qual Stud Health Well-being*. 2019;14(1):1622355.
155. Mills J, Wand T, Fraser JA. Exploring the meaning and practice of self-care among palliative care nurses and doctors: A qualitative study. *BMC Palliat Care*. 2018;17(1):63.
156. Crowe S, Brugha R. "We've all had patients who've died ...": narratives of emotion and ideals of competence among junior doctors. *Soc Sci Med*. 2018;215:152-9.
157. Lin CS, Hsu MYF, Chong CF. Differences between emergency patients and their doctors in the perception of physician empathy: implications for medical education. *Educ Health (Abingdon)*. 2008;21(2):144.
158. Kemper KJ, Schwartz A, Wilson PM, Mahan JD, Schubert CJ, Staples BB, et al. Burnout in pediatric residents: three years of national survey data. *Pediatrics*. 2020;145(1).
159. Porthe V, Vargas I, Ronda E, Malmusi D, Bosch L, Vazquez ML. Has the quality of health care for the immigrant population changed during the economic crisis in Catalonia (Spain)? Opinions of health professionals and immigrant users. *Gac Sanit*. 2018;32(5):425-32.
160. Gilligan MC, Osterberg LG, Rider EA, Derse AR, Weil AB, Litzelman DK, et al. Views of institutional leaders on maintaining humanism in today's practice. *Patient Educ Couns*. 2019;102(10):1911-6.
161. Hayuni G, Hasson-Ohayon I, Goldzweig G, Bar Sela G, Braun M. Between empathy and grief: The mediating effect of compassion fatigue among oncologists. *Psychooncology*. 2019;28(12):2344-50.
162. Kealy D, Halli P, Ogrodniczuk JS, Hadjipavlou G. Burnout among Canadian psychiatry residents: a national survey. *Can J Psychiatry*. 2016;61(11):732-6.
163. Passalacqua SA. "Running on empty": examining the effect of physician stress, burnout, and empathy on patient-centered communication during the long-call shift. *Diss Abstr Int*. 2011;71(11-A):3856.
164. Salyers MP, Flanagan ME, Firmin R, Rollins AL. Clinicians' perceptions of how burnout affects their work. *Psychiatr Serv*. 2015;66(2):204-7.
165. Walocha E, Tomaszewski KA, Wilczek-Ruzyczka E, Walocha J. Empathy and burnout among physicians of different specialities. *Folia Med Cracov*. 2013;53(2):35-42.
166. McManus IC, Jonvik H, Richards P, Paice E. Vocation and avocation: leisure activities correlate with professional engagement, but not burnout, in a cross-sectional survey of UK doctors. *BMC Med*. 2011;9:100.
167. Roze des Ordons AL, MacIsaac L, Hui J, Everson J, Ellaway RH. Compassion in the clinical context: constrained, distributed, and adaptive. *J Gen Intern Med*. 2020;35(1):198-206.
168. Bishop JP, Perry JE, Hine A. Efficient, compassionate, and fractured: contemporary care in the ICU. *Hastings Cent Rep*. 2014;44(4):35-43.
169. Kerasidou A. Empathy and efficiency in healthcare at times of austerity. *Health Care Anal*. 2019;27(3):171-84.
170. Rider EA, Gilligan MAC, Osterberg LG, Litzelman DK, Plews-Ogan M, Weil AB, et al. Healthcare at the crossroads: the need to shape an organizational culture of humanistic teaching and practice. *J Gen Intern Med*. 2018;33(7):1092-9.

## References

171. Kerasidou A, Kingori P. Austerity measures and the transforming role of A&E professionals in a weakening welfare system. *PLoS One*. 2019;14(2):e0212314.
172. Lases LSS, Arah OA, Busch ORC, Heineman MJ, Lombarts KMJMH. Learning climate positively influences residents' work-related well-being. *Adv Health Sci Educ Theory Pract*. 2019;24(2):317-30.
173. van Hoorn BT, Menendez ME, Mackert M, Donovan EE, van Heijl M, Ring D. Missed empathic opportunities during hand surgery office visits. *Hand (N Y)*. 2019:1558944719873395.
174. Meeuwesen L, Harmsen JAM, Bernsen RMD, Bruijnzeels MA. Do Dutch doctors communicate differently with immigrant patients than with Dutch patients? *Soc Sci Med*. 2006;63(9):2407-17.
175. Jennifer SL, Alexander SC, Pollak KI, Jeffreys AS, Olsen MK, Rodriguez KL, et al. Negative emotions in cancer care: Do oncologists' responses depend on severity and type of emotion? *Patient Educ Couns*. 2009;76(1):51-6.
176. Johnson Shen M, Ostroff JS, Hamann HA, Haque N, Banerjee SC, McFarland DC, et al. Structured analysis of empathic opportunities and physician responses during lung cancer patient-physician consultations. *J Health Commun*. 2019;24(9):711-8.
177. Stein HF. 'Sick people' and 'trolls': a contribution to the understanding of the dynamics of physician explanatory models. *Cult Med Psychiatry*. 1986;10(3):221-9.
178. Bertakis KD, Azari R. Patient-centered care: the influence of patient and resident physician gender and gender concordance in primary care. *J Womens Health (Larchmt)*. 2012;21(3):326-33.
179. Pollak KI, Arnold R, Alexander SC, Jeffreys AS, Olsen MK, Abernethy AP, et al. Do patient attributes predict oncologist empathic responses and patient perceptions of empathy? *Support Care Cancer*. 2010;18(11):1405-11.
180. Rubinstein G, Bentwich ME. The enemy as a patient: what can be learned from the emotional experience of physicians and why does it matter ethically? *Dev World Bioeth*. 2017;17(2):100-11.
181. Park J, Saha S, Han D, Beach MC. Emotional communication in HIV care: an observational study of patients' expressed emotional needs. *J Gen Intern Med*. 2018;33(2 Supplement 1):181-2.
182. Bategay M, Weber R, Willi J, Eich D, Siegenthaler W, Luthy R. Exploring the doctor-patient relationship reduces staff stress and enhances empathy when caring for AIDS patients. *Psychother Psychosom*. 1991;56(3):167-73.
183. Polonsky WH, Belton A, Down S, Capehorn M, Gamerman V, Nagel F, et al. Physicians' challenges when discussing the type 2 diabetes diagnosis with patients: Insights from a cross-national study (IntroDia™). *Diabetologia*. 2014;57(1 SUPPL. 1):S424.
184. Bylund CL, Makoul G. Examining empathy in medical encounters: an observational study using the empathic communication coding system. *Health Commun*. 2005;18(2):123-40.
185. Epstein RM, Hadee T, Carroll J, Meldrum SC, Lardner J, Shields CG. "Could this be something serious?" Reassurance, uncertainty, and empathy in response to patients' expressions of worry. *J Gen Intern Med*. 2007;22(12):1731-9.
186. Butalid L, Bensing JM, Verhaak PFM. Talking about psychosocial problems: an observational study on changes in doctor-patient communication in general practice between 1977 and 2008. *Patient Educ Couns*. 2014;94(3):314-21.
187. Roth CS, Burgess DJ, Mahowald ML. Medical residents' beliefs and concerns about using opioids to treat chronic cancer and noncancer pain: a pilot study. *J Rehabil Res Dev*. 2007;44(2):263-70.

## References

188. Muggleton J, Guy H, Howard R. Breaking the taboo: an interpretative phenomenological analysis of healthcare professionals' experience of caring for palliative patients with disgusting symptoms. *BMJ Support Palliat Care*. 2015;5(2):189-95.
189. Lebowitz MS, Ahn W-k. Effects of biological explanations for mental disorders on clinicians' empathy. *PNAS*. 2014;111(50):17786-90.
