# Supplementary material
Source: PubMed Central journal article supplement (PMC8904692)
Supplement: 11606_2021_7055_MOESM3_ESM.pdf [file 11606_2021_7055_MOESM3_ESM.pdf]

Table 2: Included studies

## PREDICTORS OF PHYSICIAN COMPASSION: A SYSTEMATIC REVIEW

| Author(s) and Year                                    | Title                                                                                                                                                | Country                                                                                                                                                                     | Main constructs | Construct measurement | Sample - units of analysis          | Sample size | Specialty                                                                                                                            | Response rate (%) | Methodology  | Research Design                                           | Data Type                                                        |
|-------------------------------------------------------|------------------------------------------------------------------------------------------------------------------------------------------------------|-----------------------------------------------------------------------------------------------------------------------------------------------------------------------------|-----------------|-----------------------|-------------------------------------|-------------|--------------------------------------------------------------------------------------------------------------------------------------|-------------------|--------------|-----------------------------------------------------------|------------------------------------------------------------------|
| <b>Ahrweiler et al., 2014</b> <sup>153</sup>          | Determinants of physician empathy during medical education: hypothetical conclusions from an exploratory qualitative survey of practicing physicians | Germany                                                                                                                                                                     | Empathy         | --                    | Physicians                          | 42          | 33.3% internal medicine; 26.2% pediatrics; 14.3% rehabilitation; 11.9% general medicine; others &lt;5%                               | 67%               | Qualitative  | Qualitative description/thematic analysis                 | Reflective writing/open-ended written questionnaires             |
| <b>Alcorta-Garza et al., 2016</b> <sup>94</sup>       | Cross-validation of the Spanish HP-version of the Jefferson scale of empathy confirmed with some cross-cultural differences                          | Spain and 13 Latin American countries (Mexico, Colombia, Bolivia, Argentina, Dominican Republic, Venezuela, Peru, Ecuador, Chile, Honduras, Cuba, El Salvador, and Uruguay) | Empathy         | JSE                   | Physicians & physicians-in-training | 715         | 36% hospital specialty; 34% non-hospital specialty; 10% no specialty; 9% surgical specialty; 7% medical-surgical specialty; 4% other | 80%               | Quantitative | Correlation/association study: Analytical cross-sectional | Self-report (questionnaire)                                      |
| <b>Anandarajah &amp; Roseman, 2014</b> <sup>136</sup> | A qualitative study of physicians' views on compassionate patient care and spirituality: medicine as a spiritual practice?                           | United States                                                                                                                                                               | Compassion      | --                    | Residents                           | 12          | 100% family medicine                                                                                                                 | 92%               | Qualitative  | Qualitative description/thematic analysis                 | Interviews, Reflective writing/open-ended written questionnaires |

Table 2: Included studies

## PREDICTORS OF PHYSICIAN COMPASSION: A SYSTEMATIC REVIEW

| Author(s) and Year                                            | Title                                                                                                                       | Country       | Main constructs                     | Construct measurement | Sample - units of analysis       | Sample size | Specialty                                                                                                                                                                                                                   | Response rate (%) | Methodology  | Research Design                           | Data Type                          |
|---------------------------------------------------------------|-----------------------------------------------------------------------------------------------------------------------------|---------------|-------------------------------------|-----------------------|----------------------------------|-------------|-----------------------------------------------------------------------------------------------------------------------------------------------------------------------------------------------------------------------------|-------------------|--------------|-------------------------------------------|------------------------------------|
| <b>Aomatsu et al., 2013</b> <sup>142</sup>                    | Medical students' and residents' conceptual structure of empathy: a qualitative study                                       | Japan         | Empathy                             | --                    | Residents, medical students      | 13          | NR                                                                                                                                                                                                                          | --                | Qualitative  | Qualitative description/thematic analysis | Focus groups                       |
| <b>Avasarala, Whitehouse &amp; Drake, 2015</b> <sup>122</sup> | Internship and empathy: variations across time and specialties                                                              | United States | Empathy, Empathic concern (EC)      | IRI                   | Residents                        | 74          | 17.6% emergency medicine; 2.7% otolaryngology; 5.4% family medicine; 47.3% internal medicine; 5.4% neurology; 2.7% orthopedics; 4.1% obstetrics and gynecology; 4.1% pathology; 4.1% psychiatry; 5.4% surgery; 1.4% urology | 77%               | Quantitative | Non-randomized exposure: Cohort study     | Self-report (questionnaire)        |
| <b>Baker et al., 2018</b> <sup>151</sup>                      | Compassionate care in the age of evidence-based practice: a critical discourse analysis in the context of chronic pain care | Canada        | Compassion, Compassionate care (CC) | --                    | Physicians, residents (trainees) | 9           | 100% chronic pain clinicians and trainees                                                                                                                                                                                   | --                | Qualitative  | Discourse analysis                        | Interviews, Text/document analysis |
| <b>Bateman et al., 2017</b> <sup>113</sup>                    | A qualitative examination of physician gender and parental status in pediatric end-of-life communication                    | United States | Empathy                             | --                    | Physicians                       | 17          | 100% pediatricians (35% fellows, 65% attending physicians / 47% pediatric ED, 53% PICU)                                                                                                                                     | 81%               | Qualitative  | Grounded theory                           | Interviews                         |

Table 2: Included studies

## PREDICTORS OF PHYSICIAN COMPASSION: A SYSTEMATIC REVIEW

| Author(s) and Year                          | Title                                                                                                             | Country       | Main constructs   | Construct measurement                                                                                                  | Sample - units of analysis                       | Sample size | Specialty               | Response rate (%) | Methodology   | Research Design                                                                                       | Data Type                                                                          |
|---------------------------------------------|-------------------------------------------------------------------------------------------------------------------|---------------|-------------------|------------------------------------------------------------------------------------------------------------------------|--------------------------------------------------|-------------|-------------------------|-------------------|---------------|-------------------------------------------------------------------------------------------------------|------------------------------------------------------------------------------------|
| <b>Batley et al., 2016</b> <sup>138</sup>   | Cynicism and other attitudes towards patients in an emergency department in a middle eastern tertiary care center | Lebanon       | Empathy, cynicism | --                                                                                                                     | Physicians, residents, interns, medical students | 30          | 100% emergency medicine | --                | Qualitative   | Qualitative description/thematic analysis                                                             | Interviews                                                                         |
| <b>Battegay et al., 1991</b> <sup>182</sup> | Exploring the doctor-patient relationship reduces staff stress and enhances empathy when caring for AIDS patients | Switzerland   | Empathy           | --                                                                                                                     | Physicians                                       | 11          | --                      | --                | Qualitative   | Case study                                                                                            | Case study                                                                         |
| <b>Batton et al., 2011</b> <sup>133</sup>   | Perspectives of physician parents in the NICU                                                                     | United States | Compassion        | Other non-standardized: Item "having an infant who required NICU admission has made me a more compassionate physician" | Physicians                                       | 57          | --                      | 89%               | Mixed methods | Qualitative description/thematic analysis + Correlation/association study: Analytical cross-sectional | Reflective writing/open-ended written questionnaires + Self-report (questionnaire) |

Table 2: Included studies

## PREDICTORS OF PHYSICIAN COMPASSION: A SYSTEMATIC REVIEW

| Author(s) and Year                                  | Title                                                                                    | Country       | Main constructs               | Construct measurement | Sample - units of analysis | Sample size | Specialty                                                                                                                                                                                                                                                                                             | Response rate (%)                                                       | Methodology  | Research Design                       | Data Type                   |
|-----------------------------------------------------|------------------------------------------------------------------------------------------|---------------|-------------------------------|-----------------------|----------------------------|-------------|-------------------------------------------------------------------------------------------------------------------------------------------------------------------------------------------------------------------------------------------------------------------------------------------------------|-------------------------------------------------------------------------|--------------|---------------------------------------|-----------------------------|
| <b>Bayne et al., 2013<sup>38</sup></b>              | A comprehensive model for optimizing empathy in person-centered care                     | United States | Empathy, person-centered care | --                    | Physicians                 | 21          | Mixed: FM, Family Medicine; ID, Infectious Disease; MM, Maternal Fetal Medicine; OB, OBGYN; PS, Plastic Surgery; MS, Medical Student; GC, Grief Counselor; NP, Nurse Practitioner; GS, General Surgery; PN, Pathology/Neuropathology; NE, Nephrology; PD, Pediatrics; PSY, Psychiatry; GE, Geriatrics | --                                                                      | Qualitative  | Grounded theory                       | Interviews                  |
| <b>Bellini, Baime &amp; Shea, 2002<sup>66</sup></b> | Variation of mood and empathy during internship                                          | United States | Empathy                       | IRI                   | Interns                    | 61          | NR                                                                                                                                                                                                                                                                                                    | Time 1 (98%), time 2 (72%), time 3 (79%), time 4 (79%)                  | Quantitative | Non-randomized exposure: Cohort study | Self-report (questionnaire) |
| <b>Bellini &amp; Shea, 2005<sup>67</sup></b>        | Mood change and empathy decline persist during three years of internal medicine training | United States | Empathy                       | IRI                   | Residents                  | 61          | --                                                                                                                                                                                                                                                                                                    | From Time 1 to Time 6 (98%, 72%, 79%, 79%, 94%, and 95%, respectively). | Quantitative | Non-randomized exposure: Cohort study | Self-report (questionnaire) |

Table 2: Included studies

## PREDICTORS OF PHYSICIAN COMPASSION: A SYSTEMATIC REVIEW

| Author(s) and Year                               | Title                                                                                                                                        | Country        | Main constructs                     | Construct measurement           | Sample - units of analysis | Sample size | Specialty                                                   | Response rate (%)                                 | Methodology  | Research Design                                           | Data Type                                                                                                     |
|--------------------------------------------------|----------------------------------------------------------------------------------------------------------------------------------------------|----------------|-------------------------------------|---------------------------------|----------------------------|-------------|-------------------------------------------------------------|---------------------------------------------------|--------------|-----------------------------------------------------------|---------------------------------------------------------------------------------------------------------------|
| <b>Bertakis, 2011</b> <sup>101</sup>             | Determinants and outcomes of patient-centered care                                                                                           | United States  | Patient-centered care               | Modified Davis Observation Code | Physicians, residents      | 105         | Family practice 24.8%, general internal medicine 75.2%      | Based on referred/link ed study (84% of patients) | Quantitative | Correlation/association study: Analytical cross-sectional | Self-report (questionnaire), Assessed by coders (e.g., video- or audio recorded interview assessed by coders) |
| <b>Bertakis &amp; Azari, 2012</b> <sup>178</sup> | Patient-centered care: the influence of patient and resident physician gender and gender concordance in primary care.                        | United States  | Patient-centered care               | Modified Davis Observation Code | Physicians, residents      | 105         | Family practice 24.8%, general internal medicine 75.2%      | Based on other study (84% of patients)            | Quantitative | Non-randomized exposure: Cohort study                     | Self-report (questionnaire), Assessed by coders (e.g., video- or audio recorded interview assessed by coders) |
| <b>Bessen et al., 2019</b> <sup>154</sup>        | "Sharing in hopes and worries" - a qualitative analysis of the delivery of compassionate care in palliative care and oncology at end of life | United States  | Compassionate care (CC)             | N/A - qualitative               | Physicians                 | 13          | 46.2% palliative care physicians; 53.8% medical oncologists | 50%                                               | Qualitative  | Qualitative description/thematic analysis, Phenomenology  | Interviews                                                                                                    |
| <b>Bishop et al., 2014</b> <sup>168</sup>        | Efficient, compassionate, and fractured: contemporary care in the ICU                                                                        | United Kingdom | Compassion, Compassionate care (CC) | --                              | Residents                  | 12          | 100% ICU                                                    | --                                                | Qualitative  | Qualitative description/thematic analysis                 | Focus groups                                                                                                  |

Table 2: Included studies

## PREDICTORS OF PHYSICIAN COMPASSION: A SYSTEMATIC REVIEW

| Author(s) and Year                                      | Title                                                                                                                | Country       | Main constructs                  | Construct measurement | Sample - units of analysis                                                | Sample size | Specialty                                                      | Response rate (%) | Methodology   | Research Design                                                                                       | Data Type                                                                          |
|---------------------------------------------------------|----------------------------------------------------------------------------------------------------------------------|---------------|----------------------------------|-----------------------|---------------------------------------------------------------------------|-------------|----------------------------------------------------------------|-------------------|---------------|-------------------------------------------------------------------------------------------------------|------------------------------------------------------------------------------------|
| <b>Borracci et al., 2015<sup>118</sup></b>              | Measurement of empathy among Argentine cardiologists: psychometrics and differences by age, gender, and subspecialty | Argentina     | Compassionate care (CC), Empathy | JSPE                  | Physicians                                                                | 566         | 100% cardiologists (80.9% clinical; rest-other subspecialties) | 63%               | Quantitative  | Correlation/association study: Analytical cross-sectional                                             | Self-report (questionnaire)                                                        |
| <b>Brady, Bambury &amp; O'Reilly, 2015<sup>78</sup></b> | Empathy and the wounded healer: a mixed-method study of patients and doctors' views on empathy                       | Ireland       | Empathy                          | JSPE                  | Physicians, medical students, patients                                    | 361         | Mixed                                                          | 54%               | Mixed methods | Qualitative description/thematic analysis + Correlation/association study: Analytical cross-sectional | Reflective writing/open-ended written questionnaires + Self-report (questionnaire) |
| <b>Branch et al., 2017<sup>148</sup></b>                | How physicians draw satisfaction and overcome barriers in their practices: "It sustains me"                          | United States | Humanistic care                  | --                    | Physicians                                                                | 68          | --                                                             | 74%               | Qualitative   | Case study (small group course)                                                                       | Reflective writing/open-ended written questionnaires                               |
| <b>Bratek et al., 2015<sup>49</sup></b>                 | Empathy among physicians, medical students and candidates                                                            | Poland        | Empathy, Empathic concern (EC)   | IRI                   | Physicians, residents, trainees, medical students, med. school candidates | 96          | Mixed                                                          |                   | Quantitative  | Correlation/association study: Analytical cross-sectional                                             | Self-report (questionnaire)                                                        |

Table 2: Included studies

## PREDICTORS OF PHYSICIAN COMPASSION: A SYSTEMATIC REVIEW

| Author(s) and Year                                         | Title                                                                                                                                            | Country         | Main constructs | Construct measurement                                                                | Sample - units of analysis | Sample size                  | Specialty              | Response rate (%)        | Methodology  | Research Design                                                                | Data Type                                                                         |
|------------------------------------------------------------|--------------------------------------------------------------------------------------------------------------------------------------------------|-----------------|-----------------|--------------------------------------------------------------------------------------|----------------------------|------------------------------|------------------------|--------------------------|--------------|--------------------------------------------------------------------------------|-----------------------------------------------------------------------------------|
| <b>Butalid, Bensing &amp; Verhaak, 2014</b> <sup>186</sup> | Talking about psychosocial problems: an observational study on changes in doctor-patient communication in general practice between 1977 and 2008 | The Netherlands | Empathy         | Communication patterns were rated using the Roter Interaction Analysis System (RIAS) | Physicians                 | 204                          | 100% family medicine   | NA - retrospective study | Quantitative | Non-randomized exposure: (Interrupted) time-series, Analytical cross-sectional | Assessed by coders (e.g. (video- or audio recorded) interview assessed by coders) |
| <b>Bylund &amp; Makoul, 2002</b> <sup>114</sup>            | Empathic communication and gender in the physician-patient encounter                                                                             | United States   | Empathy         | Empathic Communication Coding System (ECCS)                                          | Physicians                 | 20                           | 100% internal medicine | --                       | Quantitative | Correlation/association study: Analytical cross-sectional                      | Assessed by coders (e.g. (video- or audio recorded) interview assessed by coders) |
| <b>Bylund &amp; Makoul, 2005</b> <sup>184</sup>            | Examining empathy in medical encounters: an observational study using the empathic communication coding system                                   | United States   | Empathy         | Empathic Communication Coding System (ECCS)                                          | Physicians                 | 20 physicians (100 patients) | 100% internal medicine | --                       | Quantitative | Correlation/association study: Analytical cross-sectional                      | Assessed by coders (e.g. (video- or audio recorded) interview assessed by coders) |

Table 2: Included studies

## PREDICTORS OF PHYSICIAN COMPASSION: A SYSTEMATIC REVIEW

| Author(s) and Year                            | Title                                                                                                                                 | Country       | Main constructs                   | Construct measurement | Sample - units of analysis | Sample size | Specialty                                                                     | Response rate (%) | Methodology  | Research Design                                           | Data Type                                                                                                      |
|-----------------------------------------------|---------------------------------------------------------------------------------------------------------------------------------------|---------------|-----------------------------------|-----------------------|----------------------------|-------------|-------------------------------------------------------------------------------|-------------------|--------------|-----------------------------------------------------------|----------------------------------------------------------------------------------------------------------------|
| <b>Carmel &amp; Glick, 1996</b> <sup>50</sup> | Compassionate-empathic physicians: personality traits and social-organizational factors that enhance or inhibit this behavior pattern | Israel        | Compassionate-empathic physicians | IRI                   | Physicians                 | 214         | General (28%); Surgery (22%); Gynecology (16%); Pediatrics (14%); Other (20%) | 70%               | Quantitative | Correlation/association study: Analytical cross-sectional | Self-report (questionnaire), Assessed by coders (e.g. (video- or audio recorded) interview assessed by coders) |
| <b>Chaitoff et al., 2017</b> <sup>99</sup>    | Associations between physician empathy, physician characteristics, and standardized measures of patient experience                    | United States | Empathy                           | JSE                   | Physicians                 | 847         | Mixed                                                                         | 76%               | Quantitative | Correlation/association study: Analytical cross-sectional | Self-report (questionnaire)                                                                                    |
| <b>Charles et al., 2018</b> <sup>51</sup>     | Empathy variation in general practice: a survey among general practitioners in Denmark                                                | Denmark       | Empathy                           | JSPE                  | Physicians                 | 464         | 100% family medicine                                                          | 39%               | Quantitative | Correlation/association study: Analytical cross-sectional | Self-report (questionnaire)                                                                                    |



Table 2: Included studies

## PREDICTORS OF PHYSICIAN COMPASSION: A SYSTEMATIC REVIEW

| Author(s) and Year                                | Title                                                                              | Country       | Main constructs | Construct measurement                                                                                                                                                                                                    | Sample - units of analysis     | Sample size | Specialty                                                                                                               | Response rate (%)                                                                                                                                     | Methodology  | Research Design                                           | Data Type                   |
|---------------------------------------------------|------------------------------------------------------------------------------------|---------------|-----------------|--------------------------------------------------------------------------------------------------------------------------------------------------------------------------------------------------------------------------|--------------------------------|-------------|-------------------------------------------------------------------------------------------------------------------------|-------------------------------------------------------------------------------------------------------------------------------------------------------|--------------|-----------------------------------------------------------|-----------------------------|
| <b>Chou, Kellom &amp; Shea, 2014<sup>89</sup></b> | Attitudes and habits of highly humanistic physicians                               | United States | Humanistic care | --                                                                                                                                                                                                                       | Physicians                     | 16          | General medicine 44%; pulmonary/critical care 25%; hematology/oncology 13%; infectious disease 13%; gastrointestinal 6% | 74% of approached residents - humanistic attending physicians represented 15.5% (92) of the faculty, selected 16 (mentioned >5 times) - 100% response | Qualitative  | Qualitative description/thematic analysis                 | Interviews                  |
| <b>Cicekci et al., 2017<sup>95</sup></b>          | The communication between patient relatives and physicians in intensive care units | Turkey        | Empathy         | Questionnaire based on the patient-physician communication questionnaire that was developed by Curtis et al. (2004) for chronic obstructive pulmonary disease patients in serious condition [validated in a pilot study] | Physicians, patients' families | 103         | 55% anesthesiology; 14% pulmonology; 9% cardiovascular surgery; 8% internal medicine; 3% surgery; 12% ED.               | --                                                                                                                                                    | Quantitative | Correlation/association study: Analytical cross-sectional | Self-report (questionnaire) |

Table 2: Included studies

## PREDICTORS OF PHYSICIAN COMPASSION: A SYSTEMATIC REVIEW

| Author(s) and Year                      | Title                                                                                                                                                            | Country | Main constructs               | Construct measurement                                       | Sample - units of analysis   | Sample size | Specialty                       | Response rate (%) | Methodology  | Research Design                                           | Data Type                                    |
|-----------------------------------------|------------------------------------------------------------------------------------------------------------------------------------------------------------------|---------|-------------------------------|-------------------------------------------------------------|------------------------------|-------------|---------------------------------|-------------------|--------------|-----------------------------------------------------------|----------------------------------------------|
| Clara et al., 2006 <sup>39</sup>        | The vascular surgeon facing clinical ethical dilemmas (the VASCUETHICS Study): 'V'-shaped association between compassionate attitudes and professional seniority | Spain   | Compassion                    | CED - clinical ethical dilemmas                             | Physicians                   | 153         | 100% surgery: vascular surgeons | 88%               | Quantitative | Correlation/association study: Analytical cross-sectional | Self-report (questionnaire), Behavioral task |
| Crowe & Brugha, 2018 <sup>156</sup>     | "We've all had patients who've died ...": narratives of emotion and ideals of competence among junior doctors                                                    | Ireland | Empathy                       | --                                                          | Physicians, residents        | 50          | --                              | --                | Qualitative  | Qualitative description/thematic analysis, Case study     | Interviews                                   |
| Cyrus et al., 2017 <sup>83</sup>        | Empathic communication and essential instruction for medical students                                                                                            | Iran    | Empathy                       | JSE, Empathy also anonymously reported by another physician | Residents, trainees, interns | 215         | Mixed                           | 90%               | Quantitative | Correlation/association study: Analytical cross-sectional | Self-report (questionnaire)                  |
| Daidsen & Fosgerau, 2014 <sup>100</sup> | General practitioners' and psychiatrists' responses to emotional disclosures in patients with depression                                                         | Denmark | Empathic opportunity response | --                                                          | Physicians                   | 23          | 52.2% GPs, 47.8% psychiatrists  | --                | Qualitative  | Discourse analysis                                        | Conversation analysis                        |

Table 2: Included studies

## PREDICTORS OF PHYSICIAN COMPASSION: A SYSTEMATIC REVIEW

| Author(s) and Year                               | Title                                                                                                          | Country         | Main constructs | Construct measurement                         | Sample - units of analysis | Sample size | Specialty                                    | Response rate (%)                                                                | Methodology  | Research Design                                           | Data Type                   |
|--------------------------------------------------|----------------------------------------------------------------------------------------------------------------|-----------------|-----------------|-----------------------------------------------|----------------------------|-------------|----------------------------------------------|----------------------------------------------------------------------------------|--------------|-----------------------------------------------------------|-----------------------------|
| Dehning et al., 2014 <sup>115</sup>              | Empathy in high-tech and high-touch medicine                                                                   | Germany         | Empathy         | JSPE, BEES, Reading the mind in the eyes test | Physicians                 | 116         | Surgery 50%; psychiatry 50%                  | 93% surgeons, 86% psychiatrists                                                  | Quantitative | Correlation/association study: Analytical cross-sectional | Self-report (questionnaire) |
| Derksen et al., 2015 <sup>87</sup>               | Empathy: what does it mean for GPs? A qualitative study                                                        | The Netherlands | Empathy         | --                                            | Physicians                 | 31          | 100% family medicine                         | 31% of 100 (21% of all but sufficient variety so did not reach out to other 48%) | Qualitative  | Iterative content analysis                                | Interviews                  |
| Derksen et al., 2016 <sup>149</sup>              | Managing barriers to empathy in the clinical encounter: a qualitative interview study with GPs                 | The Netherlands | Empathy         | --                                            | Physicians                 | 31          | 100% family medicine                         | 31% of 100 (21% of all but sufficient variety so did not reach out to other 48%) | Qualitative  | Iterative content analysis                                | Interviews                  |
| Derksen et al., 2018 <sup>146</sup>              | Empathy in general practice-the gap between wishes and reality: comparing the views of patients and physicians | The Netherlands | Empathy         | --                                            | Physicians, patients       | 31          | 100% family medicine                         | 31%                                                                              | Qualitative  | Qualitative description/thematic analysis                 | Interviews                  |
| Dhawan, Steinbach & Halpern, 2007 <sup>109</sup> | Physician empathy and compassion for inmate-patients in the correctional health care setting                   | United States   | Empathy         | IRI                                           | Physicians                 | 78          | 68% primary care; 13% psychiatric; 19% other | 19%                                                                              | Quantitative | Correlation/association study: Analytical cross-sectional | Self-report (questionnaire) |

Table 2: Included studies

## PREDICTORS OF PHYSICIAN COMPASSION: A SYSTEMATIC REVIEW

| Author(s) and Year                      | Title                                                                                                                  | Country       | Main constructs               | Construct measurement | Sample - units of analysis | Sample size | Specialty                 | Response rate (%) | Methodology   | Research Design                                                                                       | Data Type                                                                                                   |
|-----------------------------------------|------------------------------------------------------------------------------------------------------------------------|---------------|-------------------------------|-----------------------|----------------------------|-------------|---------------------------|-------------------|---------------|-------------------------------------------------------------------------------------------------------|-------------------------------------------------------------------------------------------------------------|
| Di Lillo et al., 2009 <sup>79</sup>     | The Jefferson Scale of Physician Empathy: preliminary psychometrics and group comparisons in Italian physicians        | Italy         | Empathy                       | JSPE                  | Physicians                 | 289         | 27% medical; 73% surgical | 37%               | Quantitative  | Correlation/association study: Analytical cross-sectional                                             | Self-report (questionnaire)                                                                                 |
| Epstein & Borrelli, 2001 <sup>125</sup> | Pudor, honor, and autoridad: the evolving patient-physician relationship in Spain                                      | Spain         | Empathy                       | --                    | Physicians                 | 20          | 100% family medicine      |                   | Qualitative   | Qualitative description/thematic analysis, Ethnography                                                | Interviews, Participant observation                                                                         |
| Epstein et al., 2007 <sup>185</sup>     | "Could this be something serious?" Reassurance, uncertainty, and empathy in response to patients' expressions of worry | United States | Empathic opportunity response | --                    | Physicians                 | 100         | 47% GPs, 53% Internists   | 33%               | Mixed methods | Qualitative description/thematic analysis + Correlation/association study: Analytical cross-sectional | Participant observation + Assessed by coders (e.g. (video- or audio recorded) interview assessed by coders) |

Table 2: Included studies

## PREDICTORS OF PHYSICIAN COMPASSION: A SYSTEMATIC REVIEW

| Author(s) and Year                                    | Title                                                                                                                                                                                                   | Country       | Main constructs | Construct measurement                                      | Sample - units of analysis | Sample size                  | Specialty                                                                                                                                                                                                                                     | Response rate (%) | Methodology  | Research Design                                           | Data Type                                                                         |
|-------------------------------------------------------|---------------------------------------------------------------------------------------------------------------------------------------------------------------------------------------------------------|---------------|-----------------|------------------------------------------------------------|----------------------------|------------------------------|-----------------------------------------------------------------------------------------------------------------------------------------------------------------------------------------------------------------------------------------------|-------------------|--------------|-----------------------------------------------------------|-----------------------------------------------------------------------------------|
| <b>Ferreira, Afons &amp; Ramos, 2020<sup>84</sup></b> | Empathy and burnout: a multicentre comparative study between residents and specialists                                                                                                                  | Portugal      | Empathy         | JSE                                                        | Physicians                 | 104                          | 13% Internal medicine; 8% Infectious diseases; 8% General practice; 8% Pediatrics; 7% Psychiatry; 7% Obstetrics and gynecology; 13% General surgery; 7% Orthopedics; 8% Plastic surgery; 7% Urology; 8% Otorhinolaryngology; 8% Ophthalmology | --                | Quantitative | Correlation/association study: Analytical cross-sectional | Self-report (questionnaire)                                                       |
| <b>Foo et al., 2017<sup>112</sup></b>                 | Patient and physician race and the allocation of time and patient engagement efforts to mental health discussions in primary care: an observational study of audiorecorded periodic health examinations | United States | Empathy         | Multidimensional interaction analysis (MDIA) coding system | Physicians                 | 59 physicians (322 patients) | 71% general internal medicine; 29% family medicine                                                                                                                                                                                            | 47%               | Quantitative | Correlation/association study: Analytical cross-sectional | Assessed by coders (e.g. (video- or audio recorded) interview assessed by coders) |

Table 2: Included studies

## PREDICTORS OF PHYSICIAN COMPASSION: A SYSTEMATIC REVIEW

| Author(s) and Year                                         | Title                                                                                                             | Country        | Main constructs | Construct measurement | Sample - units of analysis                         | Sample size | Specialty              | Response rate (%) | Methodology  | Research Design                                           | Data Type                                                        |
|------------------------------------------------------------|-------------------------------------------------------------------------------------------------------------------|----------------|-----------------|-----------------------|----------------------------------------------------|-------------|------------------------|-------------------|--------------|-----------------------------------------------------------|------------------------------------------------------------------|
| Foreback et al., 2018 <sup>62</sup>                        | Empathy in internal medicine residents at community-based hospitals: a cross-sectional study                      | United States  | Empathy         | JSE                   | Residents                                          | 45          | 100% internal medicine | 35%               | Quantitative | Correlation/association study: Analytical cross-sectional | Self-report (questionnaire)                                      |
| Fox et al., 2009 <sup>128</sup>                            | Experiencing "the other side": a study of empathy and empowerment in general practitioners who have been patients | United Kingdom | Empathy         | --                    | Physicians                                         | 17          | 100% family medicine   | 100%              | Qualitative  | Phenomenology (IPA)                                       | Interviews                                                       |
| Fulop et al., 2011 <sup>140</sup>                          | Relationship between empathy and burnout among psychiatric residents                                              | Hungary        | Empathy         | IRI                   | Residents                                          | 67          | --                     | --                | Quantitative | Correlation/association study: Analytical cross-sectional | Self-report (questionnaire)                                      |
| Gateshill, Kucharska-Pietura & Wattis, 2011 <sup>110</sup> | Attitudes towards mental disorders and emotional empathy in mental health and other healthcare professionals      | England        | Empathy         | BEES                  | Physicians                                         | 118         | --                     | --                | Quantitative | Correlation/association study: Analytical cross-sectional | Self-report (questionnaire)                                      |
| Gilligan et al., 2019 <sup>160</sup>                       | Views of institutional leaders on maintaining humanism in today's practice                                        | United States  | Compassion      | N/A - qualitative     | Physicians, Institutional leaders (81% physicians) | 32          | --                     | --                | Qualitative  | Qualitative description/thematic analysis                 | Interviews, Reflective writing/open-ended written questionnaires |

Table 2: Included studies

## PREDICTORS OF PHYSICIAN COMPASSION: A SYSTEMATIC REVIEW

| Author(s) and Year                                    | Title                                                                                                                                                      | Country                                      | Main constructs                | Construct measurement | Sample - units of analysis                                            | Sample size      | Specialty                                                        | Response rate (%) | Methodology  | Research Design                                           | Data Type                   |
|-------------------------------------------------------|------------------------------------------------------------------------------------------------------------------------------------------------------------|----------------------------------------------|--------------------------------|-----------------------|-----------------------------------------------------------------------|------------------|------------------------------------------------------------------|-------------------|--------------|-----------------------------------------------------------|-----------------------------|
| <b>Gleichgerrcht &amp; Decety, 2013</b> <sup>52</sup> | Empathy in clinical practice: how individual dispositions, gender, and experience moderate empathic concern, burnout, and emotional distress in physicians | Latin American countries (20); 47% Argentina | Empathy, Empathic concern (EC) | IRI                   | Physicians, Residents                                                 | 7,584            | Mixed                                                            | --                | Quantitative | Correlation/association study: Analytical cross-sectional | Self-report (questionnaire) |
| <b>Gottenborg et al., 2018</b> <sup>139</sup>         | You can't have it all: the experience of academic hospitalists during pregnancy, parental leave, and return to work                                        | United States                                | Empathy                        | --                    | Physicians                                                            | 10               | --                                                               | 100%              | Qualitative  | Qualitative description/thematic analysis                 | Interviews                  |
| <b>Greenberg et al., 2015</b> <sup>70</sup>           | Empathy, sense of power, and personality: do they change during pediatric residency?                                                                       | United States                                | Empathy, Empathic concern (EC) | IRI                   | Residents                                                             | T1 = 34, T2 = 25 | 100% pediatrics                                                  | 100% - 74%        | Quantitative | Non-randomized exposure: Cohort study                     | Self-report (questionnaire) |
| <b>Haider, Riaz &amp; Gill, 2020</b> <sup>127</sup>   | Empathy in clinical practice: a qualitative study of early medical practitioners and educators                                                             | Pakistan                                     | Empathy                        | --                    | Physicians, residents, medical students, physicians/clinical teachers | 109              | 52.3% medical students; 27.5% residents; 20.2% clinical teachers | --                | Qualitative  | Qualitative description/thematic analysis                 | Focus groups                |

Table 2: Included studies

## PREDICTORS OF PHYSICIAN COMPASSION: A SYSTEMATIC REVIEW

| Author(s) and Year                  | Title                                                                                                                     | Country       | Main constructs | Construct measurement                                  | Sample - units of analysis   | Sample size | Specialty                                                                                                                                                                                | Response rate (%) | Methodology  | Research Design                                           | Data Type                                                |
|-------------------------------------|---------------------------------------------------------------------------------------------------------------------------|---------------|-----------------|--------------------------------------------------------|------------------------------|-------------|------------------------------------------------------------------------------------------------------------------------------------------------------------------------------------------|-------------------|--------------|-----------------------------------------------------------|----------------------------------------------------------|
| Handford et al., 2013 <sup>40</sup> | Empathy as a function of clinical exposure - reading emotion in the eyes                                                  | Australia     | Empathy         | IRI, EQ Baron Cohen, Reading the mind in the eyes test | Physicians, medical students | 20          | Mixed                                                                                                                                                                                    | --                | Quantitative | Correlation/association study: Analytical cross-sectional | Self-report (questionnaire), Behavioral task, Heart Rate |
| Hayuni et al., 2019 <sup>161</sup>  | Between empathy and grief: The mediating effect of compassion fatigue among oncologists                                   | Israel        | Empathy         | IRI                                                    | Physicians                   | 71          | 100% oncology (26.8% breast; 11.3% lung; 16.9% hematology; 21.1% other; 12.7% no specialty)                                                                                              | 61%               | Quantitative | Correlation/association study: Analytical cross-sectional | Self-report (questionnaire)                              |
| Hojat et al., 2002a <sup>96</sup>   | Physician empathy: definition, components, measurement, and relationship to gender and specialty                          | United States | Empathy         | JSPE                                                   | Physicians                   | 704         | 12 specialty groups, most frequent are internal Medicine (9%); Pediatrics (11%); Family Medicine (10%)                                                                                   | 70%               | Quantitative | Correlation/association study: Analytical cross-sectional | Self-report (questionnaire)                              |
| Hojat et al., 2002b <sup>92</sup>   | The Jefferson Scale of Physician Empathy: further psychometric data and differences by gender and specialty at item level | United States | Empathy         | JSE                                                    | Physicians                   | 704         | 66% "people-oriented" specialties (e.g., family medicine, emergency medicine); 34% "technology-orientated" specialties (e.g., hospital-based specialties like anesthesiology, radiology) | --                | Quantitative | Correlation/association study: Analytical cross-sectional | Self-report (questionnaire)                              |



Table 2: Included studies

## PREDICTORS OF PHYSICIAN COMPASSION: A SYSTEMATIC REVIEW

| Author(s) and Year                 | Title                                                                                                                                   | Country       | Main constructs | Construct measurement                                                                                            | Sample - units of analysis | Sample size | Specialty                                                                                                                  | Response rate (%) | Methodology  | Research Design                                           | Data Type                                                                         |
|------------------------------------|-----------------------------------------------------------------------------------------------------------------------------------------|---------------|-----------------|------------------------------------------------------------------------------------------------------------------|----------------------------|-------------|----------------------------------------------------------------------------------------------------------------------------|-------------------|--------------|-----------------------------------------------------------|-----------------------------------------------------------------------------------|
| Hojat et al., 2005 <sup>141</sup>  | Empathy scores in medical school and ratings of empathic behavior in residency training 3 years later                                   | United States | Empathy         | JSPE, Empathic behavior in residency training by a postgraduate-rating form (Hojat, Veloski, & Borenstein, 1986) | Residents                  | 106         | 39% internal medicine; 16% family medicine; 13% emergency; 10% surgery; 7% pediatrics; 14% other                           | 50%               | Quantitative | Non-randomized exposure: Cohort study                     | Assessed by coders (e.g. (video- or audio recorded) interview assessed by coders) |
| Hong et al., 2011 <sup>63</sup>    | Empathy in Korean psychiatric residents                                                                                                 | South Korea   | Empathy         | JSPE                                                                                                             | Residents                  | 319         | 100% psychiatry                                                                                                            | 53%               | Quantitative | Correlation/association study: Analytical cross-sectional | Self-report (questionnaire)                                                       |
| Jaye & Wilson, 2003 <sup>129</sup> | When general practitioners become patients                                                                                              | New Zealand   | Empathy         | --                                                                                                               | Physicians                 | 26          | 100% family medicine                                                                                                       | 18%               | Qualitative  | Qualitative description/thematic analysis                 | Interviews                                                                        |
| Jiao et al., 2014 <sup>53</sup>    | Cross-sectional study of attitudes about suicide among psychiatrists in Shanghai                                                        | China         | Empathy         | The Scale of Public Attitudes about Suicide (SPAS) - empathy subscale (4)                                        | Physicians                 | 179         | 100% psychiatry                                                                                                            | 96%               | Quantitative | Correlation/association study: Analytical cross-sectional | Self-report (questionnaire)                                                       |
| Jin et al., 2020 <sup>106</sup>    | The mediating role of psychological capital on the relation between distress and empathy of medical residents: a cross-sectional survey | China         | Empathy         | JSPE                                                                                                             | Residents                  | 537         | 33.33% internal medicine; 23.06% surgery; 5.4% obstetrics and gynecology; 2.88% pediatrics; 8.65% dentistry; 26.49% other; | 87%               | Quantitative | Correlation/association study: Analytical cross-sectional | Self-report (questionnaire)                                                       |

Table 2: Included studies

## PREDICTORS OF PHYSICIAN COMPASSION: A SYSTEMATIC REVIEW

| Author(s) and Year                       | Title                                                                                                                         | Country       | Main constructs               | Construct measurement                                                                                                                                                                                           | Sample - units of analysis                                                        | Sample size                 | Specialty                             | Response rate (%) | Methodology  | Research Design                                              | Data Type                                                                                         |
|------------------------------------------|-------------------------------------------------------------------------------------------------------------------------------|---------------|-------------------------------|-----------------------------------------------------------------------------------------------------------------------------------------------------------------------------------------------------------------|-----------------------------------------------------------------------------------|-----------------------------|---------------------------------------|-------------------|--------------|--------------------------------------------------------------|---------------------------------------------------------------------------------------------------|
| Jing, Jin & Liu, 2019 <sup>85</sup>      | The impact of monetary incentives on physician prosocial behavior in online medical consulting platforms: evidence from China | China         | Physician prosocial behavior  | Other non-standardized: Physicians' prosocial behaviors were the free consulting services offered by physicians in an online health care community, measured by the logged volume of free answers in each month | Physicians                                                                        | 26,543                      | --                                    | --                | Quantitative | Non-randomized exposure: Before-and-after study (controlled) | Behavioral task                                                                                   |
| Johnson Shen et al., 2019 <sup>176</sup> | Structured analysis of empathic opportunities and physician responses during lung cancer patient-physician consultations      | United States | Empathic opportunity response | Empathic Communication Coding System (ECCS)                                                                                                                                                                     | Physicians                                                                        | 11 physicians (56 patients) | 100% oncology: lung cancer physicians | 70%               | Quantitative | Correlation/association study: Analytical cross-sectional    | Assessed by coders (e.g., video- or audio recorded interview assessed by coders), Behavioral task |
| Julia-Sanchis et al., 2019 <sup>41</sup> | Measuring the levels of burnout syndrome and empathy of Spanish emergency medical service professionals                       | Spain         | Empathy                       | BEES                                                                                                                                                                                                            | Physicians, nurses, nursing assistants, porters, emergency healthcare technicians | 544                         | multidisciplinary                     | --                | Quantitative | Correlation/association study: Analytical cross-sectional    | Self-report (questionnaire)                                                                       |

Table 2: Included studies

## PREDICTORS OF PHYSICIAN COMPASSION: A SYSTEMATIC REVIEW

| Author(s) and Year                       | Title                                                                                                                                                                  | Country       | Main constructs                | Construct measurement                                                                                          | Sample - units of analysis | Sample size                                    | Specialty              | Response rate (%) | Methodology  | Research Design                                                   | Data Type                   |
|------------------------------------------|------------------------------------------------------------------------------------------------------------------------------------------------------------------------|---------------|--------------------------------|----------------------------------------------------------------------------------------------------------------|----------------------------|------------------------------------------------|------------------------|-------------------|--------------|-------------------------------------------------------------------|-----------------------------|
| <b>Kataoka et al., 2012<sup>42</sup></b> | Measurement and correlates of empathy among female Japanese physicians                                                                                                 | Japan         | Empathy                        | JSE                                                                                                            | Physicians                 | 285                                            | Mixed                  | 21%               | Quantitative | Correlation/association study: Analytical cross-sectional         | Self-report (questionnaire) |
| <b>Katsari et al., 2020<sup>43</sup></b> | Physicians' self-assessed empathy and patients' perceptions of physicians' empathy: validation of the Greek Jefferson scale of patient perception of physician empathy | Greece        | Empathy                        | JSPE                                                                                                           | Physicians                 | 17                                             | 100% internal medicine | --                | Quantitative | Correlation/association study: Analytical cross-sectional         | Self-report (questionnaire) |
| <b>Kealy et al., 2016<sup>162</sup></b>  | Burnout among Canadian psychiatry residents: a national survey                                                                                                         | Canada        | Empathy                        | Other non-standardized: "Likert-scale items were used to assess residents' appraisals of empathic functioning" | Residents                  | 400                                            | 100% psychiatry        | 48%               | Quantitative | Correlation/association study: Analytical cross-sectional         | Self-report (questionnaire) |
| <b>Kemper et al., 2020<sup>158</sup></b> | Burnout in pediatric residents: three years of national survey data                                                                                                    | United States | Empathy, Empathic concern (EC) | IRI                                                                                                            | Residents                  | Cohort1 N=2723, Cohort2 N=3273, Cohort3 N=3657 | 100% pediatrics        | 61% - 66% - 61%   | Quantitative | Non-randomized exposure: Cohort study, Analytical cross-sectional | Self-report (questionnaire) |

Table 2: Included studies

## PREDICTORS OF PHYSICIAN COMPASSION: A SYSTEMATIC REVIEW

| Author(s) and Year                       | Title                                                                                                       | Country       | Main constructs     | Construct measurement                                                           | Sample - units of analysis                                               | Sample size               | Specialty                                                                                   | Response rate (%) | Methodology  | Research Design                                           | Data Type                                                                         |
|------------------------------------------|-------------------------------------------------------------------------------------------------------------|---------------|---------------------|---------------------------------------------------------------------------------|--------------------------------------------------------------------------|---------------------------|---------------------------------------------------------------------------------------------|-------------------|--------------|-----------------------------------------------------------|-----------------------------------------------------------------------------------|
| Kennifer et al., 2009 <sup>175</sup>     | Negative emotions in cancer care: do oncologists' responses depend on severity and type of emotion?         | United States | Empathy             | Other non-standardized: Developed their own codebook to code empathic responses | Physicians                                                               | 48                        | 100% oncologists                                                                            | --                | Quantitative | Correlation/association study: Analytical cross-sectional | Assessed by coders (e.g. (video- or audio recorded) interview assessed by coders) |
| Kerasidou & Kingori, 2019 <sup>171</sup> | Austerity measures and the transforming role of A&E professionals in a weakening welfare system             | England       | Empathy             | --                                                                              | Physicians, nurses                                                       | 16                        | 100% emergency medicine                                                                     | --                | Qualitative  | Qualitative description/thematic analysis                 | Interviews                                                                        |
| Kerasidou, 2019 <sup>169</sup>           | Empathy and efficiency in healthcare at times of austerity                                                  | England       | Compassion, Empathy | --                                                                              | Physicians, nurses                                                       | 16                        | 100% emergency medicine                                                                     | --                | Qualitative  | Qualitative description/thematic analysis                 | Interviews                                                                        |
| Khajavi & Hekmat, 1971 <sup>71</sup>     | A comparative study of empathy: the effects of psychiatric training                                         | United States | Empathy             | Hogan's empathy scale                                                           | Physicians, residents, social workers, nurses, psychologists             | Study 1: 106; Study 2: 52 | 100% psychiatric                                                                            | --                | Quantitative | Correlation/association study: Analytical cross-sectional | Self-report (questionnaire)                                                       |
| Kirmayer, 2008 <sup>126</sup>            | Empathy and alterity in cultural psychiatry                                                                 | Canada        | Empathy             | --                                                                              | Residents                                                                | 1                         | 100% psychiatry                                                                             | --                | Qualitative  | Case study                                                | Case study presented at the conference                                            |
| Kliszcz et al., 2006 <sup>116</sup>      | Empathy in health care providers - validation study of the Polish version of the Jefferson Scale of Empathy | Poland        | Empathy             | JSE, IRI                                                                        | Physicians, medical students, nurses; nursing students, midwife students | 118                       | No specialization or internists and pediatricians gaining specialization in family medicine | --                | Quantitative | Correlation/association study: Analytical cross-sectional | Self-report (questionnaire)                                                       |

Table 2: Included studies

## PREDICTORS OF PHYSICIAN COMPASSION: A SYSTEMATIC REVIEW

| Author(s) and Year                                  | Title                                                                                                                                                              | Country       | Main constructs | Construct measurement                                                                                                                       | Sample - units of analysis | Sample size | Specialty                                                           | Response rate (%) | Methodology   | Research Design                                                                                       | Data Type                                                                                          |
|-----------------------------------------------------|--------------------------------------------------------------------------------------------------------------------------------------------------------------------|---------------|-----------------|---------------------------------------------------------------------------------------------------------------------------------------------|----------------------------|-------------|---------------------------------------------------------------------|-------------------|---------------|-------------------------------------------------------------------------------------------------------|----------------------------------------------------------------------------------------------------|
| <b>Kobayasi et al., 2018<sup>119</sup></b>          | Gender differences in the perception of quality of life during internal medicine training: a qualitative and quantitative analysis                                 | Brazil        | Empathy         | JSE                                                                                                                                         | Residents                  | 109         | 100% internal medicine                                              | 91%               | Mixed methods | Qualitative description/thematic analysis + Correlation/association study: Analytical cross-sectional | Focus groups + Self-report (questionnaire)                                                         |
| <b>Komisar &amp; McFarland , 2017<sup>123</sup></b> | Is empathy associated with a self-ascribed sense of meaning among resident physicians working with patients nearing the end of life on a hematology-oncology ward? | United States | Empathy         | IRI                                                                                                                                         | Residents, interns         | 64          | NR                                                                  | 67%               | Quantitative  | Correlation/association study: Analytical cross-sectional                                             | Self-report (questionnaire)                                                                        |
| <b>Kondo et al., 2013<sup>54</sup></b>              | Characteristics associated with empathic behavior in Japanese oncologists                                                                                          | Japan         | Empathy         | Fujimori M, Akechi T, Morita T, Inagaki M, Akizuki N, Sakano Y, et al. Preferences of cancer patients regarding the disclosure of bad news. | Physicians                 | 60          | 100% oncology; mostly surgery (56.7%) and internal medicine (41.7%) | --                | Quantitative  | Correlation/association study: Analytical cross-sectional                                             | Assessed by coders (e.g. (video- or audio recorded) interview assessed by coders), Behavioral task |

Table 2: Included studies

## PREDICTORS OF PHYSICIAN COMPASSION: A SYSTEMATIC REVIEW

| Author(s) and Year                               | Title                                                                                                                                  | Country         | Main constructs | Construct measurement                                                                                                       | Sample - units of analysis | Sample size | Specialty                                                                                                                                                                                                                                                                                                                                       | Response rate (%) | Methodology  | Research Design                                           | Data Type                   |
|--------------------------------------------------|----------------------------------------------------------------------------------------------------------------------------------------|-----------------|-----------------|-----------------------------------------------------------------------------------------------------------------------------|----------------------------|-------------|-------------------------------------------------------------------------------------------------------------------------------------------------------------------------------------------------------------------------------------------------------------------------------------------------------------------------------------------------|-------------------|--------------|-----------------------------------------------------------|-----------------------------|
| <b>Kozeny &amp; Tisanska, 2013<sup>55</sup></b>  | The structure of the Jefferson Scale of Physician Empathy in Czech physicians                                                          | Czech Republic  | Empathy         | JSE                                                                                                                         | Physicians                 | 1305        | 16.7% general practitioners;<br>13.3% gynecology;<br>13.4% internal medicine;<br>11.6% surgery;<br>9.5% pediatrics;<br>3.7% otorhinolaryngology,<br>orthopedics,<br>neurology,<br>dermatology,<br>psychiatry,<br>ophthalmology;<br>1.8% cardiology,<br>urology,<br>allergology,<br>oncology,<br>geriatrics,<br>anesthesiology,<br>endocrinology | 84%               | Quantitative | Correlation/association study: Analytical cross-sectional | Self-report (questionnaire) |
| <b>Krenek &amp; Zalewski, 1993<sup>134</sup></b> | Psychiatric illness in families of mental health professionals: Relationship to career choice and self-perceived therapeutic variables | United States   | Empathy         | Other non-standardized: Did not state questionnaire just "questions related to feelings of empathy to psychiatric patients" | Physicians, psychologists  | 265         | 44% psychiatrists;<br>56% family practice physicians                                                                                                                                                                                                                                                                                            | 23%               | Quantitative | Correlation/association study: Analytical cross-sectional | Self-report (questionnaire) |
| <b>Lases et al., 2019<sup>172</sup></b>          | Learning climate positively influences residents' work-related well-being                                                              | The Netherlands | Empathy         | JSPE                                                                                                                        | Residents                  | 144         | 77.1% surgery;<br>22.9% gynecology                                                                                                                                                                                                                                                                                                              | 53%               | Quantitative | Correlation/association study: Analytical cross-sectional | Self-report (questionnaire) |

Table 2: Included studies

## PREDICTORS OF PHYSICIAN COMPASSION: A SYSTEMATIC REVIEW

| Author(s) and Year                               | Title                                                                                                                               | Country        | Main constructs                  | Construct measurement                                                 | Sample - units of analysis | Sample size            | Specialty                                | Response rate (%)      | Methodology  | Research Design                                           | Data Type                                    |
|--------------------------------------------------|-------------------------------------------------------------------------------------------------------------------------------------|----------------|----------------------------------|-----------------------------------------------------------------------|----------------------------|------------------------|------------------------------------------|------------------------|--------------|-----------------------------------------------------------|----------------------------------------------|
| <b>Lebowitz &amp; Ahn, 2014</b> <sup>189</sup>   | Effects of biological explanations for mental disorders on clinicians' empathy                                                      | United States  | Empathy                          | Other non-standardized: via adjectives, but used before and validated | Physicians                 | N1=132; N2=105; N3=106 | 100% psychiatry/mental health clinicians | 16.88%, 14.19%, 12.83% | Quantitative | Non-randomized exposure: non-randomized trial             | Self-report (questionnaire), Behavioral task |
| <b>Lee et al., 2018</b> <sup>72</sup>            | Empathy and burnout: a study on residents from a Singapore institution                                                              | Singapore      | Compassionate care (CC), Empathy | JSPE                                                                  | Residents                  | 446                    | 56.4% medical, 46.6% surgical            | 51%                    | Quantitative | Correlation/association study: Analytical cross-sectional | Self-report (questionnaire)                  |
| <b>Lelorain et al., 2013</b> <sup>56</sup>       | Empathic concern and professional characteristics associated with clinical empathy in French general practitioners                  | France         | Empathy, Empathic concern (EC)   | JSPE, Toronto Empathy Questionnaire                                   | Physicians                 | 295                    | 100% family medicine                     | 37%                    | Quantitative | Correlation/association study: Analytical cross-sectional | Self-report (questionnaire)                  |
| <b>Lin, Hsu &amp; Chong, 2008</b> <sup>157</sup> | Differences between emergency patients and their doctors in the perception of physician empathy: implications for medical education | China (Taiwan) | Empathy                          | --                                                                    | Physicians, nurses         | 14                     | 100% emergency medicine                  | --                     | Qualitative  | Phenomenology                                             | Interviews                                   |

Table 2: Included studies

## PREDICTORS OF PHYSICIAN COMPASSION: A SYSTEMATIC REVIEW

| Author(s) and Year                                      | Title                                                                                                  | Country       | Main constructs         | Construct measurement                            | Sample - units of analysis   | Sample size | Specialty                                                | Response rate (%)                     | Methodology   | Research Design                                                                                       | Data Type                                                                                                      |
|---------------------------------------------------------|--------------------------------------------------------------------------------------------------------|---------------|-------------------------|--------------------------------------------------|------------------------------|-------------|----------------------------------------------------------|---------------------------------------|---------------|-------------------------------------------------------------------------------------------------------|----------------------------------------------------------------------------------------------------------------|
| <b>Lown, Shin &amp; Jones, 2019</b> <sup>57</sup>       | Can organizational leaders sustain compassionate, patient-centered care and mitigate burnout?          | United States | Compassionate care (CC) | Schwartz Center Compassionate Care Scale (SCCCS) | Physicians                   | 380         | 38% primary care; 60% specialist                         | 62%                                   | Quantitative  | Correlation/association study: Analytical cross-sectional                                             | Self-report (questionnaire)                                                                                    |
| <b>*Lyness, 1993</b> <sup>147</sup>                     | Physicians' use of empathy in response to patients' emotional concerns                                 | United States | Empathy                 | Other non-standardized: Own coding structure     | Residents                    | 22          | 100% Pediatrics                                          | --                                    | Qualitative   | Qualitative description/thematic analysis                                                             | Interviews                                                                                                     |
| <b>Mahoney, Sladek &amp; Neild, 2016</b> <sup>107</sup> | A longitudinal study of empathy in pre-clinical and clinical medical students and clinical supervisors | Australia     | Empathy                 | JSE                                              | Physicians, medical students | 151         | Public - mixed (no family medicine); private - 70.5% GPs | 13% and 9.1% (public/private doctors) | Mixed methods | Qualitative description/thematic analysis + Correlation/association study: Analytical cross-sectional | Reflective writing/open-ended written questionnaires + Self-report (questionnaire)                             |
| <b>Mangione et al., 2002</b> <sup>73</sup>              | Assessment of empathy in different years of internal medicine training                                 | United States | Empathy                 | JSPE, ABIM definition (ABIM, 1988)               | Residents                    | 98          | 100% internal medicine                                   | 84%                                   | Quantitative  | Correlation/association study: Analytical cross-sectional                                             | Self-report (questionnaire), Assessed by coders (e.g. (video- or audio recorded) interview assessed by coders) |



Table 2: Included studies

## PREDICTORS OF PHYSICIAN COMPASSION: A SYSTEMATIC REVIEW

| Author(s) and Year                                       | Title                                                                                                                                                                       | Country        | Main constructs                | Construct measurement | Sample - units of analysis | Sample size      | Specialty                                    | Response rate (%) | Methodology  | Research Design                                                | Data Type                   |
|----------------------------------------------------------|-----------------------------------------------------------------------------------------------------------------------------------------------------------------------------|----------------|--------------------------------|-----------------------|----------------------------|------------------|----------------------------------------------|-------------------|--------------|----------------------------------------------------------------|-----------------------------|
| <b>McFarland &amp; Roth, 2017</b> <sup>105</sup>         | Resilience of internal medicine house staff and its association with distress and empathy in an oncology setting                                                            | United States  | Empathy, Empathic concern (EC) | IRI                   | Residents, interns         | T1 = 82, T2 = 56 | 100% oncology: hematology-oncology rotations | T1 - 85% T2 - 58% | Quantitative | Non-randomized exposure: Before-and-after study (uncontrolled) | Self-report (questionnaire) |
| <b>McFarland, Malone &amp; Roth, 2017</b> <sup>104</sup> | Acute empathy decline among resident physician trainees on a hematology-oncology ward: an exploratory analysis of house staff empathy, distress, and patient death exposure | United States  | Empathy, Empathic concern (EC) | IRI                   | Residents, interns         | T1 = 82, T2 = 56 | 100% oncology: hematology-oncology rotations | T1 - 85% T2 - 58% | Quantitative | Non-randomized exposure: Before-and-after study (uncontrolled) | Self-report (questionnaire) |
| <b>McManus et al., 2011</b> <sup>166</sup>               | Vocation and avocation: Leisure activities correlate with professional engagement, but not burnout, in a cross-sectional survey of UK doctors                               | United Kingdom | Empathy                        | IRI                   | Physicians                 | 2845             | NR                                           | 64%               | Quantitative | Correlation/association study: Analytical cross-sectional      | Self-report (questionnaire) |

Table 2: Included studies

## PREDICTORS OF PHYSICIAN COMPASSION: A SYSTEMATIC REVIEW

| Author(s) and Year                                   | Title                                                                                                            | Country         | Main constructs | Construct measurement                             | Sample - units of analysis | Sample size                  | Specialty            | Response rate (%)                                        | Methodology  | Research Design                                           | Data Type                                                                         |
|------------------------------------------------------|------------------------------------------------------------------------------------------------------------------|-----------------|-----------------|---------------------------------------------------|----------------------------|------------------------------|----------------------|----------------------------------------------------------|--------------|-----------------------------------------------------------|-----------------------------------------------------------------------------------|
| <b>Meeuwesen et al., 2006</b> <sup>174</sup>         | Do Dutch doctors communicate differently with immigrant patients than with Dutch patients?                       | The Netherlands | Empathy         | Roter's Interaction Analysis System (RIAS) coding | Physicians                 | 31 physicians (144 patients) | 100% family medicine | 42% for patients; NR for GPs                             | Quantitative | Correlation/association study: Analytical cross-sectional | Assessed by coders (e.g. (video- or audio recorded) interview assessed by coders) |
| <b>Mills, Wand &amp; Fraser, 2018</b> <sup>155</sup> | Exploring the meaning and practice of self-care among palliative care nurses and doctors: a qualitative study    | Australia       | Compassion      | --                                                | Physicians, nurses         | 12                           | 100% palliative care | --                                                       | Qualitative  | Qualitative description/thematic analysis                 | Interviews                                                                        |
| <b>Moralle et al., 2016</b> <sup>111</sup>           | An exploratory study of empathy in resident physicians at an urban medical center                                | United States   | Empathy         | JSE                                               | Residents                  | 172                          | NR                   | 36%                                                      | Quantitative | Correlation/association study: Analytical cross-sectional | Self-report (questionnaire)                                                       |
| <b>Moriarty et al., 2020</b> <sup>80</sup>           | General practitioners' training and their attitudes towards young people who self-harm: a cross-sectional survey | Ireland         | Empathy         | Self-harm knowledge, attitudes, and empathy       | Physicians                 | 225                          | 100% family medicine | Not possible to calculate due to snowballing recruitment | Quantitative | Correlation/association study: Analytical cross-sectional | Self-report (questionnaire)                                                       |

Table 2: Included studies

## PREDICTORS OF PHYSICIAN COMPASSION: A SYSTEMATIC REVIEW

| Author(s) and Year                                      | Title                                                                                                                                                              | Country        | Main constructs          | Construct measurement | Sample - units of analysis | Sample size | Specialty            | Response rate (%) | Methodology | Research Design                           | Data Type                                                                                                                          |
|---------------------------------------------------------|--------------------------------------------------------------------------------------------------------------------------------------------------------------------|----------------|--------------------------|-----------------------|----------------------------|-------------|----------------------|-------------------|-------------|-------------------------------------------|------------------------------------------------------------------------------------------------------------------------------------|
| <b>Muggleton, Guy &amp; Howard, 2015</b> <sup>188</sup> | Breaking the taboo: an interpretative phenomenological analysis of healthcare professionals' experience of caring for palliative patients with disgusting symptoms | United Kingdom | Empathy, caring behavior | --                    | Physicians, nurses, OTs    | 6           | 100% palliative care | --                | Qualitative | Phenomenology (IPA)                       | Interviews, Participant observation                                                                                                |
| <b>Muslin &amp; Schlessinger, 1971</b> <sup>143</sup>   | Toward the teaching and learning of empathy                                                                                                                        | United States  | Empathy                  | --                    | Residents                  | --          | --                   | --                | Qualitative | Qualitative description/thematic analysis | Reflective writing/open-ended written questionnaires, Participant observation, Observation and reflection on videotaped interviews |

Table 2: Included studies

## PREDICTORS OF PHYSICIAN COMPASSION: A SYSTEMATIC REVIEW

| Author(s) and Year                                   | Title                                                                                                                                    | Country       | Main constructs | Construct measurement                                     | Sample - units of analysis | Sample size | Specialty                                                                                                                                                                                             | Response rate (%) | Methodology  | Research Design                                           | Data Type                                                                         |
|------------------------------------------------------|------------------------------------------------------------------------------------------------------------------------------------------|---------------|-----------------|-----------------------------------------------------------|----------------------------|-------------|-------------------------------------------------------------------------------------------------------------------------------------------------------------------------------------------------------|-------------------|--------------|-----------------------------------------------------------|-----------------------------------------------------------------------------------|
| <b>Osim et al., 2019<sup>86</sup></b>                | The Jefferson scale of physician empathy: a preliminary study of validity and reliability among physicians in Nigerian tertiary hospital | Nigeria       | Empathy         | JSE                                                       | Physicians                 | 120         | 18.3% Surgery; 15.8% Internal medicine; 14.2% Obstetrics and Gynecology; 15.2% Family Medicine; 11.7% Pediatrics; 10% Laboratory Medicine; 5.8% Anesthesiology; 5% Community medicine; 6.7% Radiology | --                | Quantitative | Correlation/association study: Analytical cross-sectional | Self-report (questionnaire)                                                       |
| <b>Paasche-Orlow &amp; Roter, 2003<sup>103</sup></b> | The communication patterns of internal medicine and family practice physicians                                                           | United States | Empathy         | Roter Interaction Analysis System (RIAS) coding           | Physicians                 | 59          | 49% family physicians; 51% internists                                                                                                                                                                 | 16%               | Quantitative | Correlation/association study: Analytical cross-sectional | Assessed by coders (e.g. (video- or audio recorded) interview assessed by coders) |
| <b>Pardeshi et al., 2017<sup>88</sup></b>            | Resident doctors' attitudes toward tuberculosis patients                                                                                 | India         | Compassion      | Other non-standardized: Feeling compassion/desire to help | Residents                  | 305         | --                                                                                                                                                                                                    | 94%               | Quantitative | Correlation/association study: Analytical cross-sectional | Self-report (questionnaire)                                                       |

Table 2: Included studies

## PREDICTORS OF PHYSICIAN COMPASSION: A SYSTEMATIC REVIEW

| Author(s) and Year                | Title                                                                                                                                           | Country       | Main constructs | Construct measurement                                       | Sample - units of analysis | Sample size                 | Specialty                             | Response rate (%) | Methodology  | Research Design                                           | Data Type                                                                         |
|-----------------------------------|-------------------------------------------------------------------------------------------------------------------------------------------------|---------------|-----------------|-------------------------------------------------------------|----------------------------|-----------------------------|---------------------------------------|-------------------|--------------|-----------------------------------------------------------|-----------------------------------------------------------------------------------|
| Park et al., 2016 <sup>64</sup>   | A multicenter study investigating empathy and burnout characteristics in medical residents with various specialties                             | South Korea   | Empathy         | JSPE                                                        | Residents                  | 317                         | 27 different specialty training areas | 42%               | Quantitative | Correlation/association study: Analytical cross-sectional | Self-report (questionnaire)                                                       |
| Park et al., 2018 <sup>181</sup>  | Emotional communication in HIV care: an observational study of patients' expressed emotional needs                                              | United States | Empathy         | Verona Coding Definitions of Emotional Sequences (VR-CoDES) | Physicians                 | 17 physicians (43 patients) | 100% HIV clinicians                   | --                | Quantitative | Correlation/association study: Analytical cross-sectional | Assessed by coders (e.g. (video- or audio recorded) interview assessed by coders) |
| *Passalacqua, 2011 <sup>163</sup> | "Running on empty": examining the effect of physician stress, burnout, and empathy on patient-centered communication during the long-call shift | United States | Empathy         | State empathy (Tsang & Stanfords 2007)                      | Residents                  | 93                          | --                                    | --                | Quantitative | Non-randomized exposure: Cohort study                     | Self-report (questionnaire)                                                       |

Table 2: Included studies

## PREDICTORS OF PHYSICIAN COMPASSION: A SYSTEMATIC REVIEW

| Author(s) and Year                                           | Title                                                                                                       | Country               | Main constructs              | Construct measurement                                                                                                                                                        | Sample - units of analysis                                                                                  | Sample size            | Specialty                                       | Response rate (%) | Methodology  | Research Design                                                                                           | Data Type                                                                                                                       |
|--------------------------------------------------------------|-------------------------------------------------------------------------------------------------------------|-----------------------|------------------------------|------------------------------------------------------------------------------------------------------------------------------------------------------------------------------|-------------------------------------------------------------------------------------------------------------|------------------------|-------------------------------------------------|-------------------|--------------|-----------------------------------------------------------------------------------------------------------|---------------------------------------------------------------------------------------------------------------------------------|
| <b>Paul-Savoie et al., 2018<sup>44</sup></b>                 | The impact of pain invisibility on patient-centered care and empathetic attitude in chronic pain management | Canada                | Patient-centered orientation | JSPE, Patient Practitioner Orientation Scale (F-PPOS); Sherbrooke Observation Scale of patient-centered care (SOS-PCC) - observed; Reynolds Empathy Scale (F-RES) - observed | Physicians, nurses                                                                                          | 21                     | 50% physicians; 50% nurses                      | --                | Quantitative | Non-randomized exposure: Case-control study                                                               | Self-report (questionnaire), Assessed by coders (e.g. (video- or audio recorded) interview assessed by coders), Behavioral task |
| <b>Pawlikowski, Sak &amp; Marczewski, 2012<sup>137</sup></b> | Physicians' religiosity and attitudes towards patients                                                      | Poland                | Empathy                      | Scale of Attitude towards the Patient (SAAtP)                                                                                                                                | Physicians                                                                                                  | 324                    | 52% working in surgical units; 48% non-surgical | 61%               | Quantitative | Correlation/association study: Analytical cross-sectional                                                 | Self-report (questionnaire)                                                                                                     |
| <b>Peng, Clarkin &amp; Doja, 2018<sup>145</sup></b>          | Uncovering cynicism in medical training: a qualitative analysis of medical online discussion forums         | United States, Canada | Cynicism                     | N/A - qualitative                                                                                                                                                            | Residents, medical students, faculty; Pharmacy and dentistry (unsure whether students/professionals though) | 511 posts, 205 posters | --                                              | --                | Qualitative  | Qualitative description/thematic analysis, Narrative research (i.e., life experience), Discourse analysis | Content analysis (e.g., forums)                                                                                                 |

Table 2: Included studies

## PREDICTORS OF PHYSICIAN COMPASSION: A SYSTEMATIC REVIEW

| Author(s) and Year                                 | Title                                                                                                                  | Country        | Main constructs | Construct measurement | Sample - units of analysis | Sample size | Specialty               | Response rate (%) | Methodology  | Research Design                                           | Data Type                   |
|----------------------------------------------------|------------------------------------------------------------------------------------------------------------------------|----------------|-----------------|-----------------------|----------------------------|-------------|-------------------------|-------------------|--------------|-----------------------------------------------------------|-----------------------------|
| <b>Pensek &amp; Selic, 2018</b> <sup>130</sup>     | Empathy and burnout in Slovenian family medicine doctors: the first presentation of Jefferson scale of empathy results | Slovenia       | Empathy         | JSE                   | Physicians, trainees       | 316         | 100% family medicine    | 56%               | Quantitative | Correlation/association study: Analytical cross-sectional | Self-report (questionnaire) |
| <b>*Petrahai &amp; Nwangwu, 2003</b> <sup>74</sup> | A study of empathy in emergency medicine residents at a Connecticut residency program                                  | United States  | Empathy         | JSE                   | Residents                  | 31          | 100% emergency medicine | 97%               | Quantitative | Correlation/association study: Analytical cross-sectional | Self-report (questionnaire) |
| <b>Picard et al., 2016</b> <sup>93</sup>           | Burnout, empathy and their relationships: a qualitative study with residents in General Medicine                       | France         | Empathy         | N/A - qualitative     | Residents                  | 24          | 100% family medicine    | 92%               | Qualitative  | Qualitative description/thematic analysis                 | Interviews                  |
| <b>Pinder, 1992</b> <sup>152</sup>                 | Striking balances: detachment or empathy in the management of Parkinson's disease?                                     | United Kingdom | Empathy         | N/A - qualitative     | Physicians                 | 18          | 100% family medicine    | --                | Qualitative  | Qualitative description/thematic analysis                 | Interviews                  |

Table 2: Included studies

## PREDICTORS OF PHYSICIAN COMPASSION: A SYSTEMATIC REVIEW

| Author(s) and Year                 | Title                                                                                           | Country       | Main constructs               | Construct measurement                                                                                                                                   | Sample - units of analysis | Sample size                          | Specialty                                                                                         | Response rate (%) | Methodology  | Research Design                                           | Data Type                                                                         |
|------------------------------------|-------------------------------------------------------------------------------------------------|---------------|-------------------------------|---------------------------------------------------------------------------------------------------------------------------------------------------------|----------------------------|--------------------------------------|---------------------------------------------------------------------------------------------------|-------------------|--------------|-----------------------------------------------------------|-----------------------------------------------------------------------------------|
| Pollak et al., 2007 <sup>58</sup>  | Oncologist communication about emotion during visits with patients with advanced cancer         | United States | Empathic opportunity response | Continuers consisted of five behaviors that have been organized by educators under the mnemonic NURSE: Name, Understand, Respect, Support, and Explore. | Physicians                 | 74 physicians (398 audio-recordings) | 100% oncologists: 90% medical oncologists, 8% gynecological oncologists, 2% radiation oncologists | 67%               | Quantitative | Correlation/association study: Analytical cross-sectional | Assessed by coders (e.g. (video- or audio recorded) interview assessed by coders) |
| Pollak et al., 2010 <sup>179</sup> | Do patient attributes predict oncologist empathic responses and patient perceptions of empathy? | United States | Empathic opportunity response | Suchman's definitions of empathic opportunities and oncologists' responses to them                                                                      | Physicians                 | 74 physicians (264 audio-recordings) | 100% oncology                                                                                     | 67%               | Quantitative | Correlation/association study: Analytical cross-sectional | Assessed by coders (e.g. (video- or audio recorded) interview assessed by coders) |



Table 2: Included studies

## PREDICTORS OF PHYSICIAN COMPASSION: A SYSTEMATIC REVIEW

| Author(s) and Year                   | Title                                                                                                                                 | Country                                                                                                                                                                                                                                                                                                                        | Main constructs | Construct measurement | Sample - units of analysis | Sample size | Specialty                                                                                                      | Response rate (%) | Methodology  | Research Design                                           | Data Type                   |
|--------------------------------------|---------------------------------------------------------------------------------------------------------------------------------------|--------------------------------------------------------------------------------------------------------------------------------------------------------------------------------------------------------------------------------------------------------------------------------------------------------------------------------|-----------------|-----------------------|----------------------------|-------------|----------------------------------------------------------------------------------------------------------------|-------------------|--------------|-----------------------------------------------------------|-----------------------------|
| Polonsky et al., 2014 <sup>183</sup> | Physicians' challenges when discussing the type 2 diabetes diagnosis with patients: Insights from a cross-national study (IntroDiaTM) | Argentina, Australia, Austria, Brazil, Bulgaria, Canada, China, Denmark, France, Germany, India, Indonesia, Israel, Japan, South Korea, Mexico, the Netherlands, Norway, the Philippines, Russia, Saudi Arabia, South Africa, Spain, the United Arab Emirates, the United Kingdom (UK) and the United States of America (USA). | Empathy         | JSE                   | Physicians                 | 6,753       | 91.6% primary care physicians; 8.4% specialists (6.8% endocrinologist, 0.8% cardiologists, 0.7% diabetologist) | 73%               | Quantitative | Correlation/association study: Analytical cross-sectional | Self-report (questionnaire) |

Table 2: Included studies

## PREDICTORS OF PHYSICIAN COMPASSION: A SYSTEMATIC REVIEW

| Author(s) and Year                                          | Title                                                                                                                                                                     | Country       | Main constructs | Construct measurement                  | Sample - units of analysis                | Sample size | Specialty                                              | Response rate (%) | Methodology  | Research Design                                           | Data Type                                    |
|-------------------------------------------------------------|---------------------------------------------------------------------------------------------------------------------------------------------------------------------------|---------------|-----------------|----------------------------------------|-------------------------------------------|-------------|--------------------------------------------------------|-------------------|--------------|-----------------------------------------------------------|----------------------------------------------|
| <b>Porte et al., 2018</b> <sup>159</sup>                    | Has the quality of health care for the immigrant population changed during the economic crisis in Catalonia (Spain)? Opinions of health professionals and immigrant users | Spain         | Empathy         | --                                     | Physicians, administrative health workers | 34          | 55.9% GPs; 44.1% specialists                           | --                | Qualitative  | Qualitative description/thematic analysis                 | Interviews                                   |
| <b>*Psyhojos, 2017</b> <sup>108</sup>                       | Aging, empathy, and the Internet of Things: a measure of physician readiness to treat older adults                                                                        | United States | Empathy         | JSPE                                   | Physicians                                | 354         | Pediatrics 12.4%, family medicine 11.3%, surgery 11.6% | --                | Quantitative | Correlation/association study: Analytical cross-sectional | Self-report (questionnaire)                  |
| <b>Putrino et al., 2018</b> <sup>59</sup>                   | Are there differences in health professionals' empathy due to academic and clinical experience?                                                                           | Argentina     | Empathy         | IRI, Reading the mind in the eyes test | Physicians, medical students              | 33          | --                                                     | --                | Quantitative | Correlation/association study: Analytical cross-sectional | Self-report (questionnaire), Behavioral task |
| <b>Rawal, Strahlendorf &amp; Nimmon, 2020</b> <sup>65</sup> | Challenging the myth of the attrition of empathy in pediatrics residents                                                                                                  | Canada        | Empathy         | --                                     | Residents                                 | 10          | 100% pediatrics                                        | --                | Qualitative  | Phenomenology                                             | Interviews                                   |

Table 2: Included studies

## PREDICTORS OF PHYSICIAN COMPASSION: A SYSTEMATIC REVIEW

| Author(s) and Year                 | Title                                                                                                                                                                 | Country       | Main constructs                | Construct measurement                                                                                                                               | Sample - units of analysis      | Sample size | Specialty                         | Response rate (%) | Methodology   | Research Design                                                                                       | Data Type                                                                          |
|------------------------------------|-----------------------------------------------------------------------------------------------------------------------------------------------------------------------|---------------|--------------------------------|-----------------------------------------------------------------------------------------------------------------------------------------------------|---------------------------------|-------------|-----------------------------------|-------------------|---------------|-------------------------------------------------------------------------------------------------------|------------------------------------------------------------------------------------|
| Reed et al., 2018 <sup>75</sup>    | Variability of burnout and stress measures in pediatric residents: an exploratory single-center study from the pediatric resident burnout-resilience study consortium | United States | Empathy, Empathic concern (EC) | IRI                                                                                                                                                 | Residents                       | 109         | 100% pediatrics                   | 74%               | Quantitative  | Non-randomized exposure: Cohort study, Analytical cross-sectional                                     | Self-report (questionnaire)                                                        |
| Rider et al., 2018 <sup>170</sup>  | Healthcare at the crossroads: the need to shape an organizational culture of humanistic teaching and practice                                                         | United States | Compassion, humanism           | --                                                                                                                                                  | Physicians (faculty physicians) | 68          | 100% family medicine              | 74%               | Qualitative   | Qualitative description/thematic analysis                                                             | Reflective writing/open-ended written questionnaires                               |
| Roberts et al., 2011 <sup>45</sup> | Are doctors who have been ill more compassionate? Attitudes of resident physicians regarding personal health issues and the expression of compassion in clinical care | United States | Compassion, Empathy            | Other non-standardized: attitudes concerning compassion and empathy with patients in relation to their own and family members' personal health care | Residents                       | 155         | 46% primary care; 54% specialties | 71%               | Mixed methods | Qualitative description/thematic analysis + Correlation/association study: Analytical cross-sectional | Reflective writing/open-ended written questionnaires + Self-report (questionnaire) |

Table 2: Included studies

## PREDICTORS OF PHYSICIAN COMPASSION: A SYSTEMATIC REVIEW

| Author(s) and Year                            | Title                                                                                                                 | Country       | Main constructs                | Construct measurement                                                                                                                                                         | Sample - units of analysis                        | Sample size             | Specialty                                  | Response rate (%) | Methodology   | Research Design                                                                                       | Data Type                                                                          |
|-----------------------------------------------|-----------------------------------------------------------------------------------------------------------------------|---------------|--------------------------------|-------------------------------------------------------------------------------------------------------------------------------------------------------------------------------|---------------------------------------------------|-------------------------|--------------------------------------------|-------------------|---------------|-------------------------------------------------------------------------------------------------------|------------------------------------------------------------------------------------|
| Rosen et al., 2006 <sup>68</sup>              | Evolution of sleep quantity, sleep deprivation, mood disturbances, empathy, and burnout among interns                 | United States | Empathy, Empathic concern (EC) | IRI                                                                                                                                                                           | Residents                                         | T1 = 58, T1 and T2 = 47 | NR                                         | 98.3% - 79.7%     | Quantitative  | Non-randomized exposure: Cohort study                                                                 | Self-report (questionnaire)                                                        |
| *Ross & Indart, 2017 <sup>150</sup>           | "This will only hurt a bit": evaluating the usage of patient focused empathy amongst general surgery residents        | United States | Empathy                        | JSE                                                                                                                                                                           | Residents                                         | 25                      | 100% surgery                               | 50%               | Mixed methods | Qualitative description/thematic analysis + Correlation/association study: Analytical cross-sectional | Reflective writing/open-ended written questionnaires + Self-report (questionnaire) |
| Roth, Burgess & Mahowald, 2007 <sup>187</sup> | Medical residents' beliefs and concerns about using opioids to treat chronic cancer and noncancer pain: a pilot study | United States | Empathy                        | Other non-standardized: Developed own 28-item to assess residents' perceptions of efficacy and safety of using opioids to treat pain in non-cancer and cancer patient samples | Residents                                         | 72                      | 78% general medicine; 22% pediatrics       | 75%               | Quantitative  | Correlation/association study: Analytical cross-sectional                                             | Self-report (questionnaire)                                                        |
| Roze des Ordon et al., 2020 <sup>167</sup>    | Compassion in the clinical context: constrained, distributed, and adaptive                                            | Canada        | Compassion                     | --                                                                                                                                                                            | Physicians although mixed (physicians and nurses) | 6                       | Critical care (50%); Palliative care (50%) | --                | Qualitative   | Ethnography, Phenomenology                                                                            | Interviews, Focus groups, Participant observation                                  |

Table 2: Included studies

## PREDICTORS OF PHYSICIAN COMPASSION: A SYSTEMATIC REVIEW

| Author(s) and Year                                   | Title                                                                                                                                                  | Country       | Main constructs                | Construct measurement                                                                                                                                     | Sample - units of analysis | Sample size | Specialty                                                                                      | Response rate (%) | Methodology   | Research Design                                                                                       | Data Type                                                                         |
|------------------------------------------------------|--------------------------------------------------------------------------------------------------------------------------------------------------------|---------------|--------------------------------|-----------------------------------------------------------------------------------------------------------------------------------------------------------|----------------------------|-------------|------------------------------------------------------------------------------------------------|-------------------|---------------|-------------------------------------------------------------------------------------------------------|-----------------------------------------------------------------------------------|
| <b>Rubinstein &amp; Bentwich, 2017<sup>180</sup></b> | The enemy as a patient: what can be learned from the emotional experience of physicians and why does it matter ethically?                              | Israel        | Empathy                        | N/A - qualitative                                                                                                                                         | Physicians                 | 10          | 20% OB/GYN; 40% orthopedics; 30% surgery; 10% pediatrics                                       | --                | Qualitative   | Phenomenology                                                                                         | Interviews                                                                        |
| <b>Saguem et al., 2020<sup>76</sup></b>              | Empathic abilities and their mediators in Tunisian psychiatry trainees.                                                                                | Tunisia       | Empathy, Empathic concern (EC) | IRI                                                                                                                                                       | Trainees                   | 120         | Mental health/illness                                                                          | --                | Quantitative  | Correlation/association study: Analytical cross-sectional                                             | Self-report (questionnaire)                                                       |
| <b>Salyers et al., 2015<sup>164</sup></b>            | Clinicians' perceptions of how burnout affects their work                                                                                              | United States | Empathy                        | --                                                                                                                                                        | Physicians                 | 123         | --                                                                                             | --                | Mixed methods | Correlation/association study: Analytical cross-sectional + Qualitative description/thematic analysis | Self-report (questionnaire)+ Reflective writing/open-ended written questionnaires |
| <b>Sandikci et al., 2017<sup>102</sup></b>           | Attitudes and behaviors of physicians in dealing with difficult patients and relatives: a cross-sectional study in two training and research hospitals | Turkey        | Empathy                        | Other non-standardized: Developed their own survey measuring attitudes and behaviors of physicians in coping with difficult patients and their relatives. | Physicians, Residents      | 400         | 38.3% serving in internal branches; 32.5% serving in surgical branches; 26% in family medicine | --                | Quantitative  | Correlation/association study: Analytical cross-sectional                                             | Self-report (questionnaire)                                                       |

Table 2: Included studies

## PREDICTORS OF PHYSICIAN COMPASSION: A SYSTEMATIC REVIEW

| Author(s) and Year                                      | Title                                                                                                                          | Country                  | Main constructs       | Construct measurement                            | Sample - units of analysis         | Sample size                                                                                        | Specialty                                                       | Response rate (%) | Methodology  | Research Design                                           | Data Type                                    |
|---------------------------------------------------------|--------------------------------------------------------------------------------------------------------------------------------|--------------------------|-----------------------|--------------------------------------------------|------------------------------------|----------------------------------------------------------------------------------------------------|-----------------------------------------------------------------|-------------------|--------------|-----------------------------------------------------------|----------------------------------------------|
| <b>Santamaria-Garcia et al., 2017</b> <sup>46</sup>     | Empathy for others' suffering and its mediators in mental health professionals                                                 | Latin-American countries | Empathic concern (EC) | IRI, Empathy for pain task (EPT), Moral judgment | Physicians, residents, non-medical | Study 1: 1109; Study 2: experiment of 42 general-physicians, and a group of 28 non-medical workers | 16.7% psychiatrists, 36.2% GPs                                  | --                | Quantitative | Non-randomized exposure: non-randomized trial             | Self-report (questionnaire), Behavioral task |
| <b>*Scott, 2011</b> <sup>144</sup>                      | Empathy in healthcare settings                                                                                                 | United Kingdom           | Empathic concern (EC) | IRI                                              | Physicians, psychology students    | 297                                                                                                | 100% family medicine                                            | 75%               | Quantitative | Correlation/association study: Analytical cross-sectional | Self-report (questionnaire)                  |
| <b>Shanafelt et al., 2005</b> <sup>77</sup>             | Relationship between increased personal well-being and enhanced empathy among internal medicine residents                      | United States            | Empathy               | IRI                                              | Residents                          | 83                                                                                                 | categorical internal medicine and preliminary internal medicine | 50%               | Quantitative | Correlation/association study: Analytical cross-sectional | Self-report (questionnaire)                  |
| <b>Shariat, Eshtad &amp; Ansari, 2010</b> <sup>47</sup> | Empathy and its correlates in Iranian physicians: a preliminary psychometric study of the Jefferson Scale of Physician Empathy | Iran                     | Empathy               | JSPE                                             | Physicians                         | 207                                                                                                | 100% family medicine                                            | 75%               | Quantitative | Correlation/association study: Analytical cross-sectional | Self-report (questionnaire)                  |

Table 2: Included studies

## PREDICTORS OF PHYSICIAN COMPASSION: A SYSTEMATIC REVIEW

| Author(s) and Year                          | Title                                                                                                           | Country        | Main constructs | Construct measurement                                                                                                                                                               | Sample - units of analysis | Sample size | Specialty                       | Response rate (%) | Methodology  | Research Design                                           | Data Type                                                                                                      |
|---------------------------------------------|-----------------------------------------------------------------------------------------------------------------|----------------|-----------------|-------------------------------------------------------------------------------------------------------------------------------------------------------------------------------------|----------------------------|-------------|---------------------------------|-------------------|--------------|-----------------------------------------------------------|----------------------------------------------------------------------------------------------------------------|
| Silvester et al., 2007 <sup>120</sup>       | "Trust me...": psychological and behavioral predictors of perceived physician empathy                           | United Kingdom | Empathy         | Other non-standardized: "a capacity and motivation to take in patient/colleague perspective, and sense associated feelings—the ability to generate a safe/understanding atmosphere" | Physicians                 | 100         | 100% family medicine            | --                | Quantitative | Correlation/association study: Analytical cross-sectional | Self-report (questionnaire), Assessed by coders (e.g. (video- or audio recorded) interview assessed by coders) |
| Stanton et al., 2011 <sup>97</sup>          | Comparison of emotional intelligence between psychiatrists and surgeons                                         | England        | Empathy         | Bar-On Emotional Quotient Inventory (Bar-On EQ-i)                                                                                                                                   | Physicians                 | 148         | 61% psychiatrists; 39% surgeons | --                | Quantitative | Correlation/association study: Analytical cross-sectional | Self-report (questionnaire)                                                                                    |
| Stein, 1986 <sup>177</sup>                  | 'Sick people' and 'trolls': a contribution to the understanding of the dynamics of physician explanatory models | United States  | Empathy         | --                                                                                                                                                                                  | Physicians                 | 1           | --                              | --                | Qualitative  | Case study                                                | Case study                                                                                                     |
| Stratta, Riding & Baker, 2016 <sup>98</sup> | Ethical erosion in newly qualified doctors: perceptions of empathy decline                                      | United Kingdom | Empathy         | --                                                                                                                                                                                  | Physicians                 | 9           | --                              | 23%               | Qualitative  | Qualitative description/thematic analysis                 | Interviews                                                                                                     |

Table 2: Included studies

## PREDICTORS OF PHYSICIAN COMPASSION: A SYSTEMATIC REVIEW

| Author(s) and Year                                     | Title                                                                                                                 | Country       | Main constructs | Construct measurement                                         | Sample - units of analysis | Sample size                  | Specialty                                                   | Response rate (%)     | Methodology  | Research Design                                           | Data Type                                                                                                      |
|--------------------------------------------------------|-----------------------------------------------------------------------------------------------------------------------|---------------|-----------------|---------------------------------------------------------------|----------------------------|------------------------------|-------------------------------------------------------------|-----------------------|--------------|-----------------------------------------------------------|----------------------------------------------------------------------------------------------------------------|
| <b>Street, Gordon &amp; Haidet, 2007<sup>121</sup></b> | Physicians' communication and perceptions of patients: is it how they look, how they talk, or is it just the doctor?  | United States | Empathy         | Global affect scales of the Roter Interaction Analysis System | Physicians                 | 29 physicians (270 patients) | Family practice, general internal medicine (% not reported) | --                    | Quantitative | Correlation/association study: Analytical cross-sectional | Self-report (questionnaire), Assessed by coders (e.g. (video- or audio recorded) interview assessed by coders) |
| <b>Suh et al., 2012<sup>81</sup></b>                   | The Jefferson Scale of Physician Empathy: a preliminary psychometric study and group comparisons in Korean physicians | South Korea   | Empathy         | JSPE                                                          | Physicians                 | 229                          | mixed                                                       | 100%                  | Quantitative | Correlation/association study: Analytical cross-sectional | Self-report (questionnaire)                                                                                    |
| <b>Swendiman et al., 2019<sup>90</sup></b>             | Attitudes and habits of highly humanistic surgeons: a single-institution, mixed methods study.                        | United States | Humanistic care | --                                                            | Physicians                 | 10                           | 100% surgeons                                               | Defined by saturation | Qualitative  | Qualitative description/thematic analysis                 | Interviews                                                                                                     |



Table 2: Included studies

## PREDICTORS OF PHYSICIAN COMPASSION: A SYSTEMATIC REVIEW

| Author(s) and Year                                         | Title                                                            | Country       | Main constructs | Construct measurement                                                       | Sample - units of analysis      | Sample size                | Specialty                                                                                                                                                                                          | Response rate (%) | Methodology  | Research Design                                           | Data Type                                                                         |
|------------------------------------------------------------|------------------------------------------------------------------|---------------|-----------------|-----------------------------------------------------------------------------|---------------------------------|----------------------------|----------------------------------------------------------------------------------------------------------------------------------------------------------------------------------------------------|-------------------|--------------|-----------------------------------------------------------|-----------------------------------------------------------------------------------|
| <b>Uygun, Brown &amp; Herbert, 2019<sup>131</sup></b>      | Understanding compassion in family medicine: a qualitative study | Canada        | Compassion      | --                                                                          | Physicians, residents, trainees | 22                         | 100% family physicians of which 59% worked in the community; co-specialization: 54.5% geriatric/long-term care; 40.9% acute hospital medicine; 23% ED; 9% palliative; 9% inner city; 5% obstetrics | --                | Qualitative  | Phenomenology                                             | Interviews                                                                        |
| <b>van Hoorn et al., 2019<sup>173</sup></b>                | Missed empathic opportunities during hand surgery office visits  | United States | Empathy         | --                                                                          | Physicians                      | 3 physicians (83 patients) | 100% surgery: hand surgeons                                                                                                                                                                        | --                | Quantitative | Non-randomized exposure: Case-control study               | Assessed by coders (e.g. (video- or audio recorded) interview assessed by coders) |
| <b>Walocha et al., 2013<sup>165</sup></b>                  | Empathy and burnout among physicians of different specialties    | Poland        | Empathy         | Epstein Emotional Empathy Scale; Thematic Apperception Test (TAT) by Murray | Physicians                      | 71                         | 40.8% primary care; 32.4% non-surgical; 26.8% - surgical                                                                                                                                           | --                | Quantitative | Correlation/association study: Analytical cross-sectional | Self-report (questionnaire), Behavioral task                                      |
| <b>Walocha, Tomaszewska &amp; Mizia, 2013<sup>60</sup></b> | Empathy level differences between Polish surgeons and physicians | Poland        | Empathy         | Epstein Emotional Empathy Scale; Thematic Apperception Test (TAT) by Murray | Physicians                      | 92                         | 56.5% non-surgical; 43.5% surgical                                                                                                                                                                 | --                | Quantitative | Correlation/association study: Analytical cross-sectional | Self-report (questionnaire), Behavioral task                                      |

Table 2: Included studies

## PREDICTORS OF PHYSICIAN COMPASSION: A SYSTEMATIC REVIEW

| Author(s) and Year                                            | Title                                                                                                                   | Country       | Main constructs                | Construct measurement            | Sample - units of analysis         | Sample size        | Specialty              | Response rate (%) | Methodology  | Research Design                                           | Data Type                                                                         |
|---------------------------------------------------------------|-------------------------------------------------------------------------------------------------------------------------|---------------|--------------------------------|----------------------------------|------------------------------------|--------------------|------------------------|-------------------|--------------|-----------------------------------------------------------|-----------------------------------------------------------------------------------|
| <b>Wasserman et al., 1983</b> <sup>117</sup>                  | Responsiveness to maternal concern in preventive child health visits: an analysis of clinician-parent interactions      | United States | Empathy                        | Resource Exchange Analysis (REA) | Residents, pediatric nurses        | 11 (interactions)  | 100% pediatrics        | --                | Quantitative | Correlation/association study: Analytical cross-sectional | Assessed by coders (e.g. (video- or audio recorded) interview assessed by coders) |
| <b>West et al., 2006</b> <sup>91</sup>                        | Association of perceived medical errors with resident distress and empathy: a prospective longitudinal study            | United States | Empathy                        | IRI                              | Residents                          | 184                | 100% internal medicine | 84%               | Quantitative | Non-randomized exposure: Cohort study                     | Self-report (questionnaire)                                                       |
| <b>West et al., 2007</b> <sup>69</sup>                        | A prospective study of the relationship between medical knowledge and professionalism among internal medicine residents | United States | Empathy, Empathic concern (EC) | IRI                              | Residents                          | T1=87, T1 & T2= 55 | NR                     | 92% - 58%         | Quantitative | Non-randomized exposure: Cohort study                     | Self-report (questionnaire), Academic knowledge assessment                        |
| <b>Wohlgemuth, Auerbach &amp; Parker, 2015</b> <sup>135</sup> | Advantages and challenges: the experience of geriatrics health care providers as family caregivers                      | United States | Empathy                        | --                               | Physicians, nurses, social workers | 16                 | 18.8% physicians       | --                | Qualitative  | Qualitative description/thematic analysis                 | Interviews                                                                        |

Table 2: Included studies

## PREDICTORS OF PHYSICIAN COMPASSION: A SYSTEMATIC REVIEW

| Author(s) and Year                   | Title                                                                                                                                                                                                         | Country         | Main constructs | Construct measurement | Sample - units of analysis | Sample size | Specialty               | Response rate (%) | Methodology  | Research Design                                           | Data Type                   |
|--------------------------------------|---------------------------------------------------------------------------------------------------------------------------------------------------------------------------------------------------------------|-----------------|-----------------|-----------------------|----------------------------|-------------|-------------------------|-------------------|--------------|-----------------------------------------------------------|-----------------------------|
| Wolfshohl et al., 2019 <sup>48</sup> | Association between empathy and burnout among emergency medicine physicians                                                                                                                                   | United States   | Empathy         | JSE                   | Physicians, Residents      | 68          | 100% emergency medicine | 92-94%            | Quantitative | Correlation/association study: Analytical cross-sectional | Self-report (questionnaire) |
| Woolf et al., 2007 <sup>132</sup>    | 'It gives you an understanding you can't get from any book.' The relationship between medical students' and doctors' personal illness experiences and their performance: a qualitative and quantitative study | United Kingdom  | Empathy         | --                    | Physicians                 | 40          | --                      | --                | Qualitative  | Qualitative description/thematic analysis                 | Interviews                  |
| Yuguero et al., 2017 <sup>124</sup>  | Association between low empathy and high burnout among primary care physicians and nurses in Lleida, Spain                                                                                                    | Spain (Catalan) | Empathy         | JSPE                  | Physicians, nurses         | 267         | GPs 50.9%               | 53%               | Quantitative | Correlation/association study: Analytical cross-sectional | Self-report (questionnaire) |

Table 2: Included studies

## PREDICTORS OF PHYSICIAN COMPASSION: A SYSTEMATIC REVIEW

| Author(s) and Year                  | Title                                                                                                                                                                               | Country         | Main constructs                  | Construct measurement                                                | Sample - units of analysis | Sample size | Specialty                                                                    | Response rate (%) | Methodology  | Research Design                                           | Data Type                                                                                                      |
|-------------------------------------|-------------------------------------------------------------------------------------------------------------------------------------------------------------------------------------|-----------------|----------------------------------|----------------------------------------------------------------------|----------------------------|-------------|------------------------------------------------------------------------------|-------------------|--------------|-----------------------------------------------------------|----------------------------------------------------------------------------------------------------------------|
| Zandbelt et al., 2007 <sup>61</sup> | Determinants of physicians' patient-centered behaviour in the medical specialist encounter                                                                                          | The Netherlands | Patient-centered behavior        | Patient-centered Behaviour Coding Instrument (Zandbelt et al., 2005) | Physicians, Residents      | 30          | mixed: general internal medicine 50%, rheumatology 17%, gastroenterology 33% | 81%               | Quantitative | Correlation/association study: Analytical cross-sectional | Self-report (questionnaire), Assessed by coders (e.g. (video- or audio recorded) interview assessed by coders) |
| Zenasni et al., 2012 <sup>82</sup>  | Development of a French-language version of the Jefferson Scale of Physician Empathy and association with practice characteristics and burnout in a sample of general practitioners | France          | Compassionate care (CC), Empathy | JSPE                                                                 | Physicians                 | 308         | 100% family medicine                                                         | 67%               | Quantitative | Correlation/association study: Analytical cross-sectional | Self-report (questionnaire)                                                                                    |

## References

38. Bayne H, Neukrug E, Hays D, Britton B. A comprehensive model for optimizing empathy in person-centered care. *Patient Educ Couns.* 2013;93(2):209-15.
39. Clara A, Merino J, Mateos E, Ysa A, Roman B, Vidal-Barraquer F, et al. The vascular surgeon facing clinical ethical dilemmas (the VASCUETHICS Study): 'V'-shaped association between compassionate attitudes and professional seniority. *Eur J Vasc Endovasc Surg.* 2006;31(6):594-9.
40. Handford C, Lemon J, Grimm MC, Vollmer-Conna U. Empathy as a function of clinical exposure - reading emotion in the eyes. *PLoS One.* 2013;8(6):e65159.
41. Julia-Sanchis R, Richart-Martinez M, Garcia-Aracil N, Jose-Alcaide L, Piquer-Donat T, Castejon-de-la-Encina ME. Measuring the levels of burnout syndrome and empathy of Spanish emergency medical service professionals. *Australas Emerg Care.* 2019;22(3):193-9.
42. Kataoka HU, Koide N, Hojat M, Gonnella JS. Measurement and correlates of empathy among female Japanese physicians. *BMC Med Educ.* 2012;12:48.
43. Katsari V, Tyritidou A, Domeyer PR, Giorgi G. Physicians' self-assessed empathy and patients' perceptions of physicians' empathy: validation of the Greek Jefferson scale of patient perception of physician empathy. *Biomed Res Int.* 2020;2020:9379756.
44. Paul-Savoie E, Bourgault P, Potvin S, Gosselin E, Lafrenaye S. The impact of pain invisibility on patient-centered care and empathetic attitude in chronic pain management. *Pain Res Manag.* 2018;2018:6375713.
45. Roberts LW, Warner TD, Moutier C, Geppert CMA, Green Hammond KA. Are doctors who have been ill more compassionate? Attitudes of resident physicians regarding personal health issues and the expression of compassion in clinical care. *Psychosomatics.* 2011;52(4):367-74.
46. Santamaria-Garcia H, Baez S, Garcia AM, Flichtentrei D, Prats M, Mastandueno R, et al. Empathy for others' suffering and its mediators in mental health professionals. *Sci Rep.* 2017;7(1):6391.
47. Shariat SV, Eshtad E, Ansari S. Empathy and its correlates in Iranian physicians: a preliminary psychometric study of the Jefferson Scale of Physician Empathy. *Med Teach.* 2010;32(10):e417-21.
48. Wolfshohl JA, Keegan Bradley CB, Bell S, Hodges C, Knowles H, Chaudhari BR, et al. Association between empathy and burnout among emergency medicine physicians. *J Clin Med Res.* 2019;11(7):532.
49. Bratek A, Bulska W, Bonk M, Seweryn M, Krysta K. Empathy among physicians, medical students and candidates. *Psychiatr Danub.* 2015;27 Suppl 1:S48-52.
50. Carmel S, Glick SM. Compassionate-empathic physicians: personality traits and social-organizational factors that enhance or inhibit this behavior pattern. *Soc Sci Med.* 1996;43(8):1253-61.
51. Charles JA, Ahnfeldt-Mollerup P, Sondergaard J, Kristensen T. Empathy variation in general practice: a survey among general practitioners in Denmark. *Int J Environ Res Public Health.* 2018;15(3).
52. Gleichgerrcht E, Decety J. Empathy in clinical practice: how individual dispositions, gender, and experience moderate empathic concern, burnout, and emotional distress in physicians. *PLoS One.* 2013;8(4):e61526.
53. Jiao Y, Phillips MR, Sheng Y, Wu G, Li X, Xiong W, et al. Cross-sectional study of attitudes about suicide among psychiatrists in Shanghai. *BMC Psychiatry.* 2014;14:87.
54. Kondo K, Fujimori M, Shirai Y, Yamada Y, Ogawa A, Hizawa N, et al. Characteristics associated with empathic behavior in Japanese oncologists. *Patient Educ Couns.* 2013;93(2):350-3.
55. Kozeny J, Tisanska L. The structure of the Jefferson Scale of Physician Empathy in Czech physicians. *Cesk Psychol.* 2013;57(6):521-32.

## References

56. Lelorain S, Sultan S, Zenasni F, Catu-Pinault A, Jaury P, Boujut E, et al. Empathic concern and professional characteristics associated with clinical empathy in French general practitioners. *Eur J Gen Pract.* 2013;19(1):23-8.
57. Lown BA, Shin A, Jones RN. Can organizational leaders sustain compassionate, patient-centered care and mitigate burnout? *J Healthc Manag.* 2019;64(6):398-412.
58. Pollak KI, Arnold RM, Jeffreys AS, Alexander SC, Olsen MK, Abernethy AP, et al. Oncologist communication about emotion during visits with patients with advanced cancer. *J Clin Oncol.* 2007;25(36):5748-52.
59. Putrino N, Tabullo Á, Mesurado B, de Minzi MCR. Are there differences in health professionals' empathy due to academic and clinical experience? *Curr Psychol.* 2018.
60. Walocha E, Tomaszewska IM, Mizia E. Empathy level differences between Polish surgeons and physicians. *Folia Med Cracov.* 2013;53(1):47-54.
61. Zandbelt LC, Smets EMA, Oort FJ, Godfried MH, de Haes HCJM. Patient participation in the medical specialist encounter: does physicians' patient-centred communication matter? *Patient Educ Couns.* 2007;65(3):396-406.
62. Foreback J, Kusz H, Lepisto BL, Pawlaczyk B. Empathy in internal medicine residents at community-based hospitals: a cross-sectional study. *J Med Educ Curric Dev.* 2018;5.
63. Hong M, Bahn GH, Lee WH, Moon SJ. Empathy in Korean psychiatric residents. *Asia Pac Psychiatry.* 2011;3(2):83-90.
64. Park C, Lee YJ, Hong M, Jung C-H, Synn Y, Kwack Y-S, et al. A multicenter study investigating empathy and burnout characteristics in medical residents with various specialties. *J Korean Med Sci.* 2016;31(4):590-7.
65. Rawal S, Strahlendorf C, Nimmon L. Challenging the myth of the attrition of empathy in paediatrics residents. *Med Educ.* 2020;54(1):82-7.
66. Bellini LM, Baime M, Shea JA. Variation of mood and empathy during internship. *JAMA.* 2002;287(23):3143-6.
67. Bellini LM, Shea JA. Mood change and empathy decline persist during three years of internal medicine training. *Acad Med.* 2005;80(2):164-7.
68. Rosen IM, Gimotty PA, Shea JA, Bellini LM. Evolution of sleep quantity, sleep deprivation, mood disturbances, empathy, and burnout among interns. *Acad Med.* 2006;81(1):82-5.
69. West CP, Huntington JL, Huschka MM, Novotny PJ, Sloan JA, Kolars JC, et al. A prospective study of the relationship between medical knowledge and professionalism among internal medicine residents. *Acad Med.* 2007;82(6):587-92.
70. Greenberg L, Agrawal D, Toto R, Blatt B. Empathy, sense of power, and personality: do they change during pediatric residency? *South Med J.* 2015;108(8):471-4.
71. Khajavi F, Hekmat H. A comparative study of empathy: the effects of psychiatric training. *Arch Gen Psychiatry.* 1971;25(6):490-3.
72. Lee PT, Loh J, Sng G, Tung J, Yeo KK. Empathy and burnout: a study on residents from a Singapore institution. *Singapore Med J.* 2018;59(1):50-4.
73. Mangione S, Kane GC, Caruso JW, Gonnella JS, Nasca TJ, Hojat M. Assessment of empathy in different years of internal medicine training. *Med Teach.* 2002;24(4):370-3.
74. Petrahai SK, Nwangwu JT. A study of empathy in emergency medicine residents at a Connecticut residency program [M.P.H.]. *Ann Arbor: Southern Connecticut State University;* 2003.
75. Reed S, Kemper KJ, Schwartz A, Batra M, Staples BB, Serwint JR, et al. Variability of burnout and stress measures in pediatric residents: an exploratory single-center study from the pediatric resident burnout-resilience study consortium. *J Evid Based Integr Med.* 2018;23:2515690X18804779.

## References

76. Saguem BN, Bouzaâbia Z, Braham A, Nasr SB. Empathic abilities and their mediators in Tunisian psychiatry trainees. *J Ment Health Train Educ Pract.* 2020.
77. Shanafelt TD, West C, Zhao X, Novotny P, Kolars J, Habermann T, et al. Relationship between increased personal well-being and enhanced empathy among internal medicine residents. *J Gen Intern Med.* 2005;20(7):559-64.
78. Brady C, Bambury RM, O'Reilly S. Empathy and the wounded healer: a mixed-method study of patients and doctors views on empathy. *Ir Med J.* 2015;108(4):125-6.
79. Di Lillo M, Cicchetti A, Lo Scalzo A, Taroni F, Hojat M. The Jefferson Scale of Physician Empathy: preliminary psychometrics and group comparisons in Italian physicians. *Acad Med.* 2009;84(9):1198-202.
80. Moriarty A, Nearchou F, Byrne M, Cullen W, Hennessy E. General practitioners' training and their attitudes towards young people who self-harm: a cross-sectional survey. *Early Interv Psychiatry.* 2020.
81. Suh DH, Hong JS, Lee DH, Gonnella JS, Hojat M. The Jefferson Scale of Physician Empathy: a preliminary psychometric study and group comparisons in Korean physicians. *Med Teach.* 2012;34(6):e464-8.
82. Zenasni F, Boujut E, Buffel du Vaure C, Catu-Pinault A, Tavani JL, Rigal L, et al. Development of a French-language version of the Jefferson Scale of Physician Empathy and association with practice characteristics and burnout in a sample of general practitioners. *Int J Pers Cent Med.* 2012;2(4):759-66.
83. Cyrus A, Salehi B, Naziri M, Sedeh BS, Vosoulie R. Empathic communication and essential instruction for medical students. *J Biol Today's World.* 2017;6(6):97-101.
84. Ferreira S, Afonso P, Ramos MDR. Empathy and burnout: a multicentre comparative study between residents and specialists. *J Eval Clin Pract.* 2020;26(1):216-22.
85. Jing D, Jin Y, Liu J. The impact of monetary incentives on physician prosocial behavior in online medical consulting platforms: evidence from China. *JMIR.* 2019;21(7):e14685.
86. Osim JH, Essien EA, Okegbe J, Udofia O. The Jefferson scale of physician empathy: a preliminary study of validity and reliability among physicians in Nigerian tertiary hospital. *Acta Medica International.* 2019;6(1):11-6.
87. Derksen F, Bensing J, Kuiper S, van Meerendonk M, Lagro-Janssen A. Empathy: what does it mean for GPs? A qualitative study. *Fam Pract.* 2015;32(1):94-100.
88. Pardeshi GS, Kadam D, Chandanwale A, Bollinger R, Deluca A. Resident doctors' attitudes toward tuberculosis patients. *Indian J Tuberc.* 2017;64(2):89-92.
89. Chou CM, Kellom K, Shea JA. Attitudes and habits of highly humanistic physicians. *Acad Med.* 2014;89(9):1252-8.
90. Swendiman RA, Marcaccio CL, Han J, Hoffman DI, Weiner TM, Nance ML, et al. Attitudes and habits of highly humanistic surgeons: a single-institution, mixed-methods study. *Acad Med.* 2019;94(7):1027-32.
91. West CP, Huschka MM, Novotny PJ, Sloan JA, Kolars JC, Habermann TM, et al. Association of perceived medical errors with resident distress and empathy: a prospective longitudinal study. *JAMA.* 2006;296(9):1071-8.
92. Hojat M, Gonnella JS, Nasca TJ, Mangione S, Veloksi JJ, Magee M. The Jefferson Scale of Physician Empathy: Further psychometric data and differences by gender and specialty at item level. *Acad Med.* 2002;77(Suppl10):S58-S60.
93. Picard J, Catu-Pinault A, Boujut E, Botella M, Jaury P, Zenasni F. Burnout, empathy and their relationships: a qualitative study with residents in General Medicine. *Psychol Health Med.* 2016;21(3):354-61.

## References

94. Alcorta-Garza A, San-Martin M, Delgado-Bolton R, Soler-Gonzalez J, Roig H, Vivanco L. Cross-validation of the Spanish HP-version of the Jefferson scale of empathy confirmed with some cross-cultural differences. *Front Psychol.* 2016;7.
95. Cicekci F, Duran N, Ayhan B, Arican S, Ilban O, Kara I, et al. The communication between patient relatives and physicians in intensive care units. *BMC Anesthesiol.* 2017;17(1):97.
96. Hojat M, Gonnella JS, Nasca TJ, Mangione S, Vergare M, Magee M. Physician empathy: definition, components, measurement, and relationship to gender and specialty. *Am J Psychiatry.* 2002;159(9):1563-9.
97. Stanton C, Sethi FN, Dale O, Phelan M, Laban JT, Eliahoo J. Comparison of emotional intelligence between psychiatrists and surgeons. *Psychiatrist.* 2011;35(4):124-9.
98. Stratta EC, Riding DM, Baker P. Ethical erosion in newly qualified doctors: perceptions of empathy decline. *Int J Med Educ.* 2016;7:286-92.
99. Chaitoff A, Sun B, Windover A, Bokar D, Featherall J, Rothberg MB, et al. Associations between physician empathy, physician characteristics, and standardized measures of patient experience. *Acad Med.* 2017;92(10):1464-71.
100. Davidsen AS, Fosgerau CF. General practitioners' and psychiatrists' responses to emotional disclosures in patients with depression. *Patient Educ Couns.* 2014;95(1):61-8.
101. Bertakis KD, Azari R. Determinants and outcomes of patient-centered care. *Patient Educ Couns.* 2011;85(1):46-52.
102. Sandikci KB, Ustu Y, Sandikci MM, Kayhan Tetik B, Isik D, Ugurlu M. Attitudes and behaviors of physicians in dealing with difficult patients and relatives: a cross-sectional study in two training and research hospitals. *Turk J Med Sci.* 2017;47(1):222-33.
103. Paasche-Orlow M, Roter D. The communication patterns of internal medicine and family practice physicians. *J Am Board Fam Med.* 2003;16(6):485-93.
104. McFarland DC, Malone AK, Roth A. Acute empathy decline among resident physician trainees on a hematology-oncology ward: an exploratory analysis of house staff empathy, distress, and patient death exposure. *Psychooncology.* 2017;26(5):698-703.
105. McFarland DC, Roth A. Resilience of internal medicine house staff and its association with distress and empathy in an oncology setting. *Psychooncology.* 2017;26(10):1519-25.
106. Jin J, Li H, Song W, Jiang N, Zhao W, Wen D. The mediating role of psychological capital on the relation between distress and empathy of medical residents: a cross-sectional survey. *Med Educ Online.* 2020;25(1):1710326.
107. Mahoney S, Sladek RM, Neild T. A longitudinal study of empathy in pre-clinical and clinical medical students and clinical supervisors. *BMC Med Educ.* 2016;16(1):270.
108. Psychojos MA. Aging, empathy, and the Internet of Things: a measure of physician readiness to treat older adults: Massachusetts Institute of Technology; 2017.
109. Dhawan N, Steinbach AB, Halpern J. Physician empathy and compassion for inmate-patients in the correctional health care setting. *J Correct Health Care.* 2007;13(4):257-67.
110. Gatheshill G, Kucharska-Pietura K, Wattis J. Attitudes towards mental disorders and emotional empathy in mental health and other healthcare professionals. *Psychiatrist.* 2011;35(3):101-5.
111. Moralle MR, Preston JS, Chen L, Berberian WS. An exploratory study of empathy in resident physicians at an urban medical center. *Int J Caring Sci.* 2016;9(2):526-33.
112. Foo PK, Frankel RM, McGuire TG, Zaslavsky AM, Elston Lafata J, Ming T-S. Patient and physician race and the allocation of time and patient engagement efforts to mental health discussions in primary care: an observational study of audiorecorded periodic health examinations. *J Ambul Care Manage.* 2017;40(3):246-56.



## References

113. Bateman LB, White ML, Tofil NM, Clair JM, Needham BL. A qualitative examination of physician gender and parental status in pediatric end-of-life communication. *Health Commun.* 2017;32(7):903-9.
114. Bylund CL, Makoul G. Empathic communication and gender in the physician-patient encounter. *Patient Educ Couns.* 2002;48(3):207-16.
115. Dehning S, Reis E, Krause D, Gasperi S, Meyer S, Dargel S, et al. Empathy in high-tech and high-touch medicine. *Patient Educ Couns.* 2014;95(2):259-64.
116. Kliszcz J, Nowicka-Sauer K, Trzeciak B, Nowak P, Sadowska A. Empathy in health care providers--validation study of the Polish version of the Jefferson Scale of Empathy. *Adv Med Sci.* 2006;51:219-25.
117. Wasserman RC, Inui TS, Barriatua RD, Carter WB, Lippincott P. Responsiveness to maternal concern in preventive child health visits: an analysis of clinician-parent interactions. *J Dev Behav Pediatr.* 1983;4(3):171-6.
118. Borracci RA, Doval HC, Nunez C, Samarelli M, Tamini S, Tanus E. Measurement of empathy among Argentine cardiologists: Psychometrics and differences by age, gender, and subspecialty. *Cardiol J.* 2015;22(1):52-6.
119. Kobayasi R, Tempiski PZ, Arantes-Costa FM, Martins MA. Gender differences in the perception of quality of life during internal medicine training: a qualitative and quantitative analysis. *BMC Med Educ.* 2018;18(1):281.
120. Silvester J, Patterson F, Koczwara A, Ferguson E. "Trust me...": psychological and behavioral predictors of perceived physician empathy. *J Appl Psychol.* 2007;92(2):519-27.
121. Street Jr RL, Gordon H, Haidet P. Physicians' communication and perceptions of patients: is it how they look, how they talk, or is it just the doctor? *Soc Sci Med.* 2007;65(3):586-98.
122. Avasarala SK, Whitehouse S, Drake SM. Internship and empathy: variations across time and specialties. *South Med J.* 2015;108(10):591-5.
123. Komisar J, McFarland DC. Is empathy associated with a self-ascribed sense of meaning among resident physicians working with patients nearing the end of life on a hematology-oncology ward? *Psychooncology.* 2017;26(9):1403-6.
124. Yuguero O, Ramon Marsal J, Esquerda M, Vivanco L, Soler-Gonzalez J. Association between low empathy and high burnout among primary care physicians and nurses in Lleida, Spain. *Eur J Gen Pract.* 2017;23(1):4-10.
125. Epstein RM, Borrell i Carrio F. Pudor, honor, and autoridad: the evolving patient-physician relationship in Spain. *Patient Educ Couns.* 2001;45(1):51-7.
126. Kirmayer LJ. Empathy and alterity in cultural psychiatry. *Ethos.* 2008;36(4):457-74.
127. Haider SI, Riaz Q, Gill RC. Empathy in clinical practice: a qualitative study of early medical practitioners and educators. *J Pak Med Assoc.* 2020;70(1):116-22.
128. Fox FE, Rodham KJ, Harris MF, Taylor GJ, Sutton J, Scott J, et al. Experiencing "the other side": a study of empathy and empowerment in general practitioners who have been patients. *Qual Health Res.* 2009;19(11):1580-8.
129. Jaye C, Wilson H. When general practitioners become patients. *Health (London).* 2003;7(2):201-25.
130. Penssek L, Selic P. Empathy and burnout in Slovenian family medicine doctors: the first presentation of Jefferson scale of empathy results. *Zdr Varst.* 2018;57(3):155-65.
131. Uygur J, Brown JB, Herbert C. Understanding compassion in family medicine: a qualitative study. *Br J Gen Pract.* 2019;69(680):e208-e16.
132. Woolf K, Cave J, McManus IC, Dacre JE. 'It gives you an understanding you can't get from any book.' The relationship between medical students' and doctors' personal illness experiences and their performance: a qualitative and quantitative study. *BMC Med Educ.* 2007;7:50.

## References

133. Batton B, Verhulst S, Batton D, Davis A, Collin M, Walsh M. Perspectives of physician parents in the NICU. *Child Health Care*. 2011;40(4):326-43.
134. Krenek RJ, Zalewski C. Psychiatric illness in families of mental health professionals: relationship to career choice and self-perceived therapeutic variables. *J Soc Behav Pers*. 1993;8(3):439-52.
135. Wohlgenuth CM, Auerbach HP, Parker VA. Advantages and challenges: the experience of geriatrics health care providers as family caregivers. *Gerontologist*. 2015;55(4):595-604.
136. Anandarajah G, Roseman JL. A qualitative study of physicians' views on compassionate patient care and spirituality: medicine as a spiritual practice? *R I Med J* (2013). 2014;97(3):17-22.
137. Pawlikowski J, Sak JJ, Marczewski K. Physicians' religiosity and attitudes towards patients. *Ann Agric Environ Med*. 2012;19(3):503-7.
138. Batley NJ, Nasreddine Z, Chami A, Zebian D, Bachir R, Abbas HA. Cynicism and other attitudes towards patients in an emergency department in a middle eastern tertiary care center. *BMC Med Educ*. 2016;16:36.
139. Gottenborg E, Maw A, Ngov LK, Burden M, Ponomaryova A, Jones CD. You can't have it all: the experience of academic hospitalists during pregnancy, parental leave, and return to work. *J Hosp Med*. 2018;13(12):836-9.
140. Fulop E, Devecsery A, Hausz K, Kovacs Z, Csabai M. Relationship between empathy and burnout among psychiatric residents. *New Medicine*. 2011;2011-January(4):143-7.
141. Hojat M, Mangione S, Nasca TJ, Gonnella JS, Magee M. Empathy scores in medical school and ratings of empathic behavior in residency training 3 years later. *J Soc Psychol*. 2005;145(6):663-72.
142. Aomatsu M, Otani T, Tanaka A, Ban N, van Dalen J. Medical students' and residents' conceptual structure of empathy: a qualitative study. *Educ Health (Abingdon)*. 2013;26(1):4-8.
143. Muslin HL, Schlessinger N. Toward the teaching and learning of empathy. *Bull Menninger Clin*. 1971;35(4):262-71.
144. Scott E. A positively embodied approach to psychotherapy. *Women Ther*. 2019;42(1-2):131-46.
145. Peng J, Clarkin C, Doja A. Uncovering cynicism in medical training: a qualitative analysis of medical online discussion forums. *BMJ Open*. 2018;8(10):e022883.
146. Derksen FAWM, Olde Hartman T, Bensing J, Lagro-Janssen A. Empathy in general practice-the gap between wishes and reality: comparing the views of patients and physicians. *Fam Pract*. 2018;35(2):203-8.
147. Lyness Richard DA. Physicians' use of empathy in response to patients' emotional concerns. *Diss Abstr Int*. 1993;54(2-A):463-4.
148. Branch WT, Jr., Weil AB, Gilligan MC, Litzelman DK, Hafler JP, Plews-Ogan M, et al. How physicians draw satisfaction and overcome barriers in their practices: "It sustains me". *Patient Educ Couns*. 2017;100(12):2320-30.
149. Derksen FA, Olde Hartman TC, Bensing JM, Lagro-Janssen AL. Managing barriers to empathy in the clinical encounter: a qualitative interview study with GPs. *Br J Gen Pract*. 2016;66(653):e887-e95.
150. Ross R. "This will only hurt a bit" evaluating the usage of patient focused empathy amongst general surgery residents [Psy.D.]. *Ann Arbor: Rutgers The State University of New Jersey, Graduate School of Applied and Professional Psychology*; 2017.
151. Baker LR, Martimianakis MAT, Nasirzadeh Y, Northup E, Gold K, Friesen F, et al. Compassionate care in the age of evidence-based practice: a critical discourse analysis in the context of chronic pain care. *Acad Med*. 2018;93(12):1841-9.

## References

152. Pinder R. Striking balances: detachment or empathy in the management of Parkinson's disease? *Fam Pract*. 1992;9(3):274-8.
153. Ahrweiler F, Neumann M, Goldblatt H, Hahn EG, Scheffer C. Determinants of physician empathy during medical education: hypothetical conclusions from an exploratory qualitative survey of practicing physicians. *BMC Med Educ*. 2014;14:122.
154. Bessen S, Jain RH, Brooks WB, Mishra M. "Sharing in hopes and worries"-a qualitative analysis of the delivery of compassionate care in palliative care and oncology at end of life. *Int J Qual Stud Health Well-being*. 2019;14(1):1622355.
155. Mills J, Wand T, Fraser JA. Exploring the meaning and practice of self-care among palliative care nurses and doctors: A qualitative study. *BMC Palliat Care*. 2018;17(1):63.
156. Crowe S, Brugha R. "We've all had patients who've died ...": narratives of emotion and ideals of competence among junior doctors. *Soc Sci Med*. 2018;215:152-9.
157. Lin CS, Hsu MYF, Chong CF. Differences between emergency patients and their doctors in the perception of physician empathy: implications for medical education. *Educ Health (Abingdon)*. 2008;21(2):144.
158. Kemper KJ, Schwartz A, Wilson PM, Mahan JD, Schubert CJ, Staples BB, et al. Burnout in pediatric residents: three years of national survey data. *Pediatrics*. 2020;145(1).
159. Porthe V, Vargas I, Ronda E, Malmusi D, Bosch L, Vazquez ML. Has the quality of health care for the immigrant population changed during the economic crisis in Catalonia (Spain)? Opinions of health professionals and immigrant users. *Gac Sanit*. 2018;32(5):425-32.
160. Gilligan MC, Osterberg LG, Rider EA, Derse AR, Weil AB, Litzelman DK, et al. Views of institutional leaders on maintaining humanism in today's practice. *Patient Educ Couns*. 2019;102(10):1911-6.
161. Hayuni G, Hasson-Ohayon I, Goldzweig G, Bar Sela G, Braun M. Between empathy and grief: The mediating effect of compassion fatigue among oncologists. *Psychooncology*. 2019;28(12):2344-50.
162. Kealy D, Halli P, Ogrodniczuk JS, Hadjipavlou G. Burnout among Canadian psychiatry residents: a national survey. *Can J Psychiatry*. 2016;61(11):732-6.
163. Passalacqua SA. "Running on empty": examining the effect of physician stress, burnout, and empathy on patient-centered communication during the long-call shift. *Diss Abstr Int*. 2011;71(11-A):3856.
164. Salyers MP, Flanagan ME, Firmin R, Rollins AL. Clinicians' perceptions of how burnout affects their work. *Psychiatr Serv*. 2015;66(2):204-7.
165. Walocha E, Tomaszewski KA, Wilczek-Ruzyczka E, Walocha J. Empathy and burnout among physicians of different specialities. *Folia Med Cracov*. 2013;53(2):35-42.
166. McManus IC, Jonvik H, Richards P, Paice E. Vocation and avocation: leisure activities correlate with professional engagement, but not burnout, in a cross-sectional survey of UK doctors. *BMC Med*. 2011;9:100.
167. Roze des Ordons AL, MacIsaac L, Hui J, Everson J, Ellaway RH. Compassion in the clinical context: constrained, distributed, and adaptive. *J Gen Intern Med*. 2020;35(1):198-206.
168. Bishop JP, Perry JE, Hine A. Efficient, compassionate, and fractured: contemporary care in the ICU. *Hastings Cent Rep*. 2014;44(4):35-43.
169. Kerasidou A. Empathy and efficiency in healthcare at times of austerity. *Health Care Anal*. 2019;27(3):171-84.
170. Rider EA, Gilligan MAC, Osterberg LG, Litzelman DK, Plews-Ogan M, Weil AB, et al. Healthcare at the crossroads: the need to shape an organizational culture of humanistic teaching and practice. *J Gen Intern Med*. 2018;33(7):1092-9.

## References

171. Kerasidou A, Kingori P. Austerity measures and the transforming role of A&E professionals in a weakening welfare system. *PLoS One*. 2019;14(2):e0212314.
172. Lases LSS, Arah OA, Busch ORC, Heineman MJ, Lombarts KMJM. Learning climate positively influences residents' work-related well-being. *Adv Health Sci Educ Theory Pract*. 2019;24(2):317-30.
173. van Hoorn BT, Menendez ME, Mackert M, Donovan EE, van Heijl M, Ring D. Missed empathic opportunities during hand surgery office visits. *Hand (N Y)*. 2019:1558944719873395.
174. Meeuwesen L, Harmsen JAM, Bernsen RMD, Bruijnzeels MA. Do Dutch doctors communicate differently with immigrant patients than with Dutch patients? *Soc Sci Med*. 2006;63(9):2407-17.
175. Jennifer SL, Alexander SC, Pollak KI, Jeffreys AS, Olsen MK, Rodriguez KL, et al. Negative emotions in cancer care: Do oncologists' responses depend on severity and type of emotion? *Patient Educ Couns*. 2009;76(1):51-6.
176. Johnson Shen M, Ostroff JS, Hamann HA, Haque N, Banerjee SC, McFarland DC, et al. Structured analysis of empathic opportunities and physician responses during lung cancer patient-physician consultations. *J Health Commun*. 2019;24(9):711-8.
177. Stein HF. 'Sick people' and 'trolls': a contribution to the understanding of the dynamics of physician explanatory models. *Cult Med Psychiatry*. 1986;10(3):221-9.
178. Bertakis KD, Azari R. Patient-centered care: the influence of patient and resident physician gender and gender concordance in primary care. *J Womens Health (Larchmt)*. 2012;21(3):326-33.
179. Pollak KI, Arnold R, Alexander SC, Jeffreys AS, Olsen MK, Abernethy AP, et al. Do patient attributes predict oncologist empathic responses and patient perceptions of empathy? *Support Care Cancer*. 2010;18(11):1405-11.
180. Rubinstein G, Bentwich ME. The enemy as a patient: what can be learned from the emotional experience of physicians and why does it matter ethically? *Dev World Bioeth*. 2017;17(2):100-11.
181. Park J, Saha S, Han D, Beach MC. Emotional communication in HIV care: an observational study of patients' expressed emotional needs. *J Gen Intern Med*. 2018;33(2 Supplement 1):181-2.
182. Bategay M, Weber R, Willi J, Eich D, Siegenthaler W, Luthy R. Exploring the doctor-patient relationship reduces staff stress and enhances empathy when caring for AIDS patients. *Psychother Psychosom*. 1991;56(3):167-73.
183. Polonsky WH, Belton A, Down S, Capehorn M, Gamerman V, Nagel F, et al. Physicians' challenges when discussing the type 2 diabetes diagnosis with patients: Insights from a cross-national study (IntroDia™). *Diabetologia*. 2014;57(1 SUPPL. 1):S424.
184. Bylund CL, Makoul G. Examining empathy in medical encounters: an observational study using the empathic communication coding system. *Health Commun*. 2005;18(2):123-40.
185. Epstein RM, Hadee T, Carroll J, Meldrum SC, Lardner J, Shields CG. "Could this be something serious?" Reassurance, uncertainty, and empathy in response to patients' expressions of worry. *J Gen Intern Med*. 2007;22(12):1731-9.
186. Butalid L, Bensing JM, Verhaak PFM. Talking about psychosocial problems: an observational study on changes in doctor-patient communication in general practice between 1977 and 2008. *Patient Educ Couns*. 2014;94(3):314-21.
187. Roth CS, Burgess DJ, Mahowald ML. Medical residents' beliefs and concerns about using opioids to treat chronic cancer and noncancer pain: a pilot study. *J Rehabil Res Dev*. 2007;44(2):263-70.

## References

188. Muggleton J, Guy H, Howard R. Breaking the taboo: an interpretative phenomenological analysis of healthcare professionals' experience of caring for palliative patients with disgusting symptoms. *BMJ Support Palliat Care*. 2015;5(2):189-95.
189. Lebowitz MS, Ahn W-k. Effects of biological explanations for mental disorders on clinicians' empathy. *PNAS*. 2014;111(50):17786-90.
